# Supplementary material for: Phosphoproteomic Profiling of In Vivo Signaling in Liver by the Mammalian Target of Rapamycin Complex 1 (mTORC1)
Source: PLoS One. 2011 Jun 28;6(6):e21729. doi: 10.1371/journal.pone.0021729 (PMC3125343; doi:10.1371/journal.pone.0021729)
Supplement: Table S1 — Table of peptide sequences, phosphorylation site assignment statistics (standard deviation and coefficient of variation), and quantitative analysis for all data described in this manuscript. (XLS) [file pone.0021729.s001.xls]

## Sheet: All Proteomic Data
Supplemental Material 1: Table of peptide sequences, phosphorylation site assignment statistics (standard deviation and coefficient of variation), and quantitative analysis for all data described in this manuscript.
counter	protein name	peptide sequence	phospho site	minimum mass error (ppm)	xcorr (max for all animal samples)	gi	swissprot accession	hprd accession	string accession number	scansite motif	peak area Control 1	peak area Rapamycin 1	peak area Control 2	peak area Rapamycin 2	peak area Control 3	peak area Rapamycin 3	Control / Rap. ratio 1	Control / Rap. ratio 2	Control / Rap. ratio 3	isolated mass Control 1	isolated mass Rapamycin 1	isolated mass Control 2	isolated mass Rapamycin 2	isolated mass Control 3	isolated mass Rapamycin 3	ascore (max for all animal samples)	charge state Control 1	charge state Rapamycin 1	charge state Control 2	charge state Rapamycin 2	charge state Control 3	charge state Rapamycin 3	mass error (ppm) Control 1	mass error (ppm) Rapamycin 1	mass error (ppm) Control 2	mass error (ppm) Rapamycin 2	mass error (ppm) Control 3	mass error (ppm) Rapamycin 3	xcorr Control 1	xcorr Rapamycin 1	xcorr Control 2	xcorr Rapamycin 2	xcorr Control 3	xcorr Rapamycin 3	ascore Control 1	ascore Rapamycin 1	ascore Control 2	ascore Rapamycin 2	ascore Control 3
824948	0 beta-2 globin [Rattus norvegicus]	K.GTFAS*LSELHCDK.L	S88	0.304277	3.2806	395937	P02088				12696.8	15819.4	443044	65047.2	110029	83654.8	0.802608	6.81112	1.31527			772.828				32.1312			2						2.11699						3.2806						32.1312
823243	10-formyltetrahydrofolate dehydrogenase [Rattus norvegicus]	K.GS*ASSDLELTEAELATAEAVR.S	S309	6.43632	4.3876	11968144	P28037				99142.1	195747	8244.25	19343.2	2.00084e+06	57738.7	0.50648	0.426208	34.6534					734.01		10.9691					3						6.43632						4.3876						10.9691
822599	10-formyltetrahydrofolate dehydrogenase [Rattus norvegicus]	K.GSAS*SDLELTEAELATAEAVR.S	S311	13.6771	3.7839	11968144	P28037				239955	212717	1.16575e+06	1.91058e+06	816112	3.53953e+06	1.12805	0.610154	0.23057					734.017	734.015	7.03769					3	3					15.927	13.6771					3.7839	3.5215
822598	10-formyltetrahydrofolate dehydrogenase [Rattus norvegicus]	K.GSASS*DLELTEAELATAEAVR.S	S312	2.87272	6.6117	11968144	P28037				7.1548e+06	2.38454e+06	5.62806e+06	8.66199e+06	9.36699e+06	6.95986e+06	3.00049	0.649742	1.34586			1100.51	1100.51	1100.52	1100.51	9.6384			2	2	2	2			2.87272	2.87272	18.1224	6.91358			3.7435	3.3961	6.2055	6.6117				9.6384
824172	10-formyltetrahydrofolate dehydrogenase [Rattus norvegicus]	K.GSASS*DLELTEAELATAEAVR.S	S312	8.84991	3.8693	11968144	P28037				239955	110857	645028	1.47874e+06	2.60345e+06	1.26711e+06	2.16453	0.436201	2.05464					734.012	734.019	7.03769					3	3					8.84991	18.6724					3.3333	3.8693					7.03769
824517	10-formyltetrahydrofolate dehydrogenase [Rattus norvegicus]	K.SGAAS*VDVVR.L	S354	11.2735	4.1383	11968144	O75891	2594			244651	271952	12229.3	13454.5	3356.2	164293	0.89961	0.908932	0.0204281						520.749	55.7106						2						12.2154						4.1383
826957	1110064P04Rik protein [Mus musculus] [MASS=32323]	K.S*PAVLEAER.G	S231	19.0306	2.7895	31127128					1.08046e+08	2.918e+07	3.35641e+06	1.34202e+06	3.40996e+07	227275	3.70273	2.50102	150.037	526.234	526.234	526.235	526.234			100	2	2	2	2			19.8391	19.9532	19.0306	19.8391			2.7895	2.6839	2.6834	2.6183			100	100	100	100
825134	2,3-oxidosqualene:lanosterol cyclase [Rattus norvegicus]	K.CIS*IGPIS*K.T	S335S340	4.04597	2.6816	639865	Q8BLN5		395850		ND	ND	410826	227492	ND	ND	1	1.80589	1				567.735			100				2						4.04597						2.6816						100
826829	230kDa phosphatidylinositol 4-kinase [Rattus norvegicus]	K.TSS*VSSISQVSPER.G	S199*	6.74349	3.5431	1944499	P42356	8972	396176		1.57572e+06	3.27799e+07	620935	783762	3.95586e+07	256685	0.0480699	0.79225	154.113	772.359						-0.268721	2						6.74349						3.5431
827114	26S proteasome subunit p112 [Rattus norvegicus]	R.TVGT*PIASVPGSTNTGTVPGPEK.D	T273*	12.6874	3.9157	3288594	O88761		405366	p38_Kin (T273) 0.27%	2.07449e+06	1.86339e+06	1.06534e+06	76182.1	349799	1.04898e+06	1.11329	13.9841	0.333465		1124.06					-0.819172		2						12.6874						3.9157
823009	26S proteasome subunit p112 [Rattus norvegicus]	K.TAGAVAGKT*PDAS*PEPK.D	T311S315*	1.65646	5.7446	3288594	O88761		405366		3.39759e+06	3.32056e+06	3.05581e+06	1.55568e+06	861694	142434	1.0232	1.9643	6.0498	878.885	878.884	878.883		878.886		107.427	2	2	2		2		3.73983	3.25599	1.65646		5.61828		5.6186	5.1846	3.4935		5.7446		107.427	102.652	26.9236		87.2737
825209	2700008B19Rik-like protein [Rattus norvegicus]	K.ALPAGPSLEEASLS*SPK.G	S713	3.17791	3.805	119351091			396529		5.92634e+06	3.88888e+06	363316	625329	382036	2.92351e+06	1.52392	0.581	0.130677		867.43		867.424			42.4279		2		2				9.6548		3.17791				3.805		2.5134				42.4279		6.53213
824780	2700008B19Rik-like protein [Rattus norvegicus]	K.ALPAGPSLEEASLSS*PK.G	S714	0.859366	3.4293	119351091			396529		6.32841e+06	3.97032e+06	338792	625329	523375	510012	1.59393	0.541781	1.0262		867.429	867.426	867.423		867.432	33.8039		2	2	2		2		8.74354	5.01198	2.19744		12.6135		3.4293	2.6835	3.3165		3.3009		27.6042	30.193	33.8039
821989	2-hydroxyphytanoyl-CoA lyase [Rattus norvegicus]	K.ECCMPPPLSLAETS*AVR.A	S204	3.37361	4.4442	25165938			411662		1.69469e+06	5.75698e+06	3.0104e+06	2.31773e+06	5.17025e+06	758774	0.294371	1.29886	6.81396		999.426			999.444		27.6042		2			2			4.56993			13.8797			2.8952			4.4442			10.7918			27.6042
822047	3 alpha-hydroxysteroid dehydrogenase; 3alphaHSD [Rattus sp.]	K.S*PVLLDDPVLCAIAK.K	S232	1.45489	5.1471	236058	P23457		405135		269478	527223	601321	135861	389236	1.56342e+06	0.511127	4.42601	0.248965					845.929	845.94	100					2	2					1.45489	14.0874					4.9454	5.1471					100
823500	3 alpha-hydroxysteroid dehydrogenase; 3alphaHSD [Rattus sp.]	K.TWVDQKS*PVLLDDPVLCAIAK.K	S232	7.78926	5.5819	236058	P23457		405135		21090	29621.4	4299.38	ND	784.4	84756.5	0.711984	4299.38	0.00925474						816.753	44.5767						3						7.78926						5.5819
823785	3 alpha-hydroxysteroid dehydrogenase; 3alphaHSD [Rattus sp.]	R.DKTWVDQKS*PVLLDDPVLCAIAK.K	S232	2.84987	7.0566	236058	P23457		405135		ND	550867	1.40334e+06	5.80118e+06	201137	485954	1.81532e-06	0.241906	0.413902			897.791	897.79		897.795	69.6789			3	3		3			4.51816	3.56698		8.73904			6.3364	6.008		7.0566			58.4553	69.6789
827430	3-hydroxy-3-methylglutaryl-Coenzyme A synthase 2; 3-hydroxy-3-methylglutary-Coenzyme A synthase [Rattus norvegicus]	K.DAS*PGSPLEK.L	S430	3.1283	2.39	27465521	P54869		406164		1.29589e+06	671508	91011.5	415157	1.14078e+06	211578	1.92982	0.219222	5.39175	1080.46	1080.45					28.5733	1	1					3.1283	5.49768					1.998	2.39					28.5733	28.5733
823016	3-hydroxy-3-methylglutaryl-Coenzyme A synthase 2; 3-hydroxy-3-methylglutary-Coenzyme A synthase [Rattus norvegicus]	K.DASPGS*PLEK.L	S433	1.95287	2.5914	27465521	P54869		406164	Cdc2_Kin (S433) 0.32% Cdk5_Kin (S433) 0.58% p38_Kin (S433) 0.83%	1744274	5.13871e+06	1.00208e+06	1.97458e+06	2.45796e+06	1.71369e+06	0.339438	0.507491	1.43431	1080.46	1080.47		1080.47	1080.48	1080.48	20.0607	1	1		1	1	1	3.08201	5.4606		4.77572	17.3164	14.6047	2.3843	2.5914		2.5063	2.4146	2.585	17.4269	17.4269		17.4269	16.4088
823017	3-hydroxy-3-methylglutaryl-Coenzyme A synthase 2; 3-hydroxy-3-methylglutary-Coenzyme A synthase [Rattus norvegicus]	K.DASPGS*PLEK.L	S433	2.34159	2.5591	27465521	P54869		406164	Cdc2_Kin (S433) 0.32% Cdk5_Kin (S433) 0.58% p38_Kin (S433) 0.83%	4.10346e+06	1.59009e+07	4.01918e+06	8.03865e+06	4.59155e+06	2.21894e+06	0.258064	0.499982	2.06925			540.736	540.735	540.737		68.0645			2	2	2				3.47073	2.34159	5.61794				2.4563	2.2862	2.5591				37.6956	46.8588	68.0645
827532	3-hydroxy-3-methylglutaryl-Coenzyme A synthase 2; 3-hydroxy-3-methylglutary-Coenzyme A synthase [Rattus norvegicus]	K.LVS*SVSDLPK.R	S440	2.37426	2.2849	27465521	P54869		406164		1.24983e+06	1.53164e+06	649822	2.68188e+06	347644	ND	0.816008	0.242301	347644		562.785					10.7918		2						2.37426						2.2849						10.7918
825682	3-hydroxy-3-methylglutaryl-Coenzyme A synthase 2; 3-hydroxy-3-methylglutary-Coenzyme A synthase [Rattus norvegicus]	K.LVSS*VSDLPK.R	S441	1.83182	3.0136	27465521	P54869		406164		1.24983e+06	1.53164e+06	698124	3.09591e+06	335029	ND	0.816008	0.225499	335029		562.786		562.786			19.0849		2		2				4.9797		4.75739				2.6294		3.0136				19.0849		13.9358
822413	3-hydroxyanthranilate 3,4-dioxygenase [Rattus norvegicus]	R.VKS*WVEENR.A	S9	0.0733762	3.8423	1040694	Q78JT3		413186		1.09675e+07	1.94208e+07	8.36613e+06	1.19742e+07	9.4655e+06	7.64095e+06	0.564727	0.698682	1.23879	613.784	613.786	613.784	613.783	613.791	613.788	100	2	2	2	2	2	2	2.91873	6.69349	2.82905	1.1251	14.6587	10.5824	3.8423	3.1606	3.4987	3.4268	3.2428	3.1898	100	100	100	100	100
824914	3-hydroxyanthranilate 3,4-dioxygenase [Rattus norvegicus]	R.VKS*WVEENR.A	S9	0.70115	3.8138	1040694	Q78JT3		413186		18543.2	168358	528672	573402	300048	62736.6	0.110142	0.921993	4.78266			409.523	409.524			100			3	3					1.59797	0.790831					2.9009	3.8138					100	100
827218	3-hydroxyanthranilate 3,4-dioxygenase [Rattus norvegicus]	K.S*WVEENR.A	S9	2.59157	2.8925	1040694	Q78JT3		413186		4.7636e+06	4.0693e+06	214216	146525	619356	ND	1.17062	1.46198	619356	500.202	500.202					100	2	2					4.11248	3.93237					2.6773	2.8925					100	100
824064	3'-phosphoadenosine 5'-phosphosulfate synthase 2 (predicted) [Rattus norvegicus] [MASS=39458]	R.HDEFDFIS*GTR.M	S306	0.904839	4.2162	149062716			401272		46412.6	31339.7	54966.8	3192.85	33982.9	369381	1.48095	17.2156	0.0919996	702.286					702.29	25.8003	2					2	0.904839					6.64733	4.2162					4.025	25.8003
825374	4-hydroxyphenylpyruvate dioxygenase [Rattus norvegicus]	R.KKS*QIQEYVDYNGGAGVQHIALR.T	S250	3.69586	4.8058	3435296	P32755		395893	PKA_Kin (S247) 0.58%	119925	39673.1	28861.4	142849	518.2	24534.9	3.02282	0.202042	0.021121				885.444			6.19789				3						3.69586						4.8058						6.19789
822185	4-trimethylaminobutyraldehyde dehydrogenase [Rattus norvegicus]	K.VSFTGS*VPTGMK.I	S233	3.7115	2.9226	7248632	P49189	4109	397385	PKC_mu (S201) 0.81%	22002	7450	2836.32	ND	616613	5044.2	2.95329	2836.32	122.242					645.796		22.043					2						3.7115						2.9226						22.043
823394	5'-3' exoribonuclease 2 (predicted), isoform CRA_a [Rattus norvegicus] [MASS=108646]	R.NS*PGCQVASNPR.Q	S448*	2.04894	4.2698	149041185	Q9DBR1		401881		1.20784e+07	832800	991171	446626	1.61182e+06	3.3857e+06	14.5034	2.21924	0.476067		683.785		683.785	683.79	683.792	126.212		2		2	2	2		4.01738		3.65882	11.2471	14.8254		3.7852		4.2116	3.1423	4.2698		67.5247		126.212	36.1732
823322	5'-3' exoribonuclease 2 (predicted), isoform CRA_a [Rattus norvegicus] [MASS=108646]	R.KAEDS*DS*EPEPEDNVR.L	S499S501*	0.333887	5.4075	149041185	Q9H0D6	10309	401881	Casn_Kin2 (S501) 0.17%	3.73686e+07	1.69713e+07	2.93745e+07	1.75974e+07	1.50428e+07	10308.4	2.20188	1.66925	1459.28	988.865	988.869	988.863	988.862	988.868		100	2	2	2	2	2		3.29839	7.55793	1.25966	0.824599	6.51076		5.0691	5.4075	5.0444	4.9433	5.0519		100	100	100	100	100
826418	5'-3' exoribonuclease 2 (predicted), isoform CRA_a [Rattus norvegicus] [MASS=108646]	K.AEDS*DS*EPEPEDNVR.L	S499S501*	2.93191	4.6589	149041185	Q9H0D6	10309	401881	Casn_Kin2 (S501) 0.17%	6.78084e+06	7.10935e+06	4.68296e+06	2.38749e+06	75777	316093	0.953793	1.96146	0.23973	924.821	924.82	924.817				100	2	2	2				7.6543	6.0369	3.26188				4.4555	4.6589	4.1094				100	100	100
827842	5'-3' exoribonuclease 2 (predicted), isoform CRA_a [Rattus norvegicus] [MASS=108646]	R.KAEDS*DS*EPEPEDNVR.L	S499S501*	1.28496	3.7559	149041185	Q9H0D6	10309	401881	Casn_Kin2 (S501) 0.17%	4359.93	5.14604e+06	5.15207e+06	4.95902e+06	1.18943e+06	ND	0.000847239	1.03893	1.18943e+06			659.578				100			3						1.65426						3.7559						100
824202	5'-AMP-activated protein kinase alpha-1 catalytic subunit [Rattus norvegicus]	R.SGS*ISNYR.S	S485	0.342539	3.0143	1155267	Q5EG47		402438	Akt_Kin (S485) 0.47%	3.98127e+06	4.91154e+06	2.73595e+06	8.78879e+06	218693	80410.7	0.810595	0.3113	2.7197		482.201	482.201	482.2	482.204		41.229		2	2	2	2			1.54661	0.664318	0.342539	7.18289			2.9665	2.959	3.0143	2.5058			41.229	39.2689	22.6557	13.9358
821871	5I2 antigen precursor [Rattus norvegicus]	R.NS*LTQEV.-	S492	2.8379	2.2482	987688					1.72458e+06	823982	909859	310515	2.76898e+06	817642	2.09298	2.93016	3.38654	870.369	870.368	870.363		870.366		32.5648	1	1	1		1		9.28342	8.85832	2.8379		5.84812		2.0895	2.2482	2.0202		2.0809		30.0974	32.5648	27.9961		22.5438
821944	6-phosphofructokinase [Rattus norvegicus]	R.TLS*IDKGF.-	S775	1.24942	2.9388	56887	P12382		395814	Akt_Kin (S775) 0.91%	575510	142415	917084	1.36662e+06	1.52578e+06	259662	4.04108	0.67106	5.87601			480.726	480.727	480.728	480.731	38.1398			2	2	2	2			1.24942	3.86278	4.81025	11.1718			2.9388	2.8669	2.4866	2.4609			25.2895	28.945	38.1398
822197	6-phosphofructokinase [Rattus norvegicus]	R.TLS*IDKGF.-	S775	0.312356	2.6959	56887	P12382		395814	Akt_Kin (S775) 0.91%	2.10844e+06	1.07033e+06	431561	250897	1.42797e+06	49695.6	1.9699	1.72007	28.7343					960.444		11.9539					1						0.312356						2.6959						11.9539
827964	6-phosphogluconolactonase (predicted), isoform CRA_a [Rattus norvegicus] [MASS=38794]	R.FALGLSGGS*LVSMLAR.D	S83	2.6826	5.0145	149036104	O95336	12001	405587		612321	1.96566e+07	548520	1.32298e+06	10604.5	155987	0.031151	0.414611	0.067983			829.923	829.923			39.3892			2	2					2.86345	3.30954					4.7389	5.0145					39.3892	36.0382
827675	6-pyruvoyl-tetrahydropterin synthase [Rattus norvegicus]	R.LHS*PSLSAEENLK.V	S27	0.0265833	3.3838	8394115	P27213		400206	p38_Kin (S27) 0.75%	1.44368e+06	9.03476e+06	1.90809e+06	82637	1867.37	924102	0.159792	23.09	0.00202074	752.856						32.1312	2						0.0265833						3.3838						32.1312
825299	A kinase (PRKA) anchor protein 13, isoform CRA_b [Rattus norvegicus] [MASS=301402]	K.FLSHS*TDSLNK.I	S1891*	0.519348	3.6601	149057214	Q12802	5253	401203		1.71034e+06	763496	667523	1.11274e+06	1089.67	151123	2.24014	0.599891	0.00721044	664.8			664.799			22.043	2			2			3.0935			2.08492			2.8924			3.6601			9.0759			22.043
822818	A kinase (PRKA) anchor protein 13, isoform CRA_b [Rattus norvegicus] [MASS=301402]	K.SGSLDSELSVS*PK.R	S2676	2.35995	3.7305	149057214	Q12802	5253	401203	Cdk5_Kin (S1344) 0.34% Cdc2_Kin (S1344) 0.8%	1.76965e+06	460796	3.62813e+06	4.78209e+06	4.60897e+06	1.32997e+06	3.84041	0.758691	3.46548			693.315		693.318		47.7991			2		2				2.35995		7.29632				3.7305		3.7062				47.7991		25.8003
824049	A kinase (PRKA) anchor protein 13, isoform CRA_b [Rattus norvegicus] [MASS=301402]	R.EDQRT*PPPGQEISR.L	T932	0.041426	3.6001	149057214					3.71084e+06	6.31866e+06	1.33645e+06	1.5193e+06	966918	3.67793e+06	0.587284	0.879649	0.262897			563.925	563.925		563.929	143.04			3	3		3			0.822602	0.47344		8.62837			3.6001	3.4684		3.4192			143.04	116.874
823716	A kinase (PRKA) anchor protein 2 (predicted) [Rattus norvegicus] [MASS=95940]	R.TLS*MIEEEIR.A	S730	7.64265	3.7189	55250573	Q9Y2D5	9197	401422	PKC_epsilon (S740) 0.36% Akt_Kin (S740) 0.37%	28746.3	50845	4665.35	9037.98	371987	223800	0.565372	0.516194	1.66214						650.801	35.1415						2						7.64265						3.7189
826693	A kinase anchor protein 8 [Rattus norvegicus]	R.ADSEGDLS*ENDDGAGDLR.S	S326*	5.74194	3.6217	27661722	Q63014		398646		80742.9	248459	ND	183297	5093.23	27490.4	0.324974	5.45563e-06	0.185273		958.369					63.4184		2						5.74194						3.6217						63.4184
824182	A kinase anchor protein 8 [Rattus norvegicus]	R.NEAAVPAAAAGS*PVPVIAIPGILEDELEQTDAEAK.D	S659	3.17523	6.273	27661722	Q63014		398646		788279	714262	1.72904e+06	3.69718e+06	3.45221e+06	287267	1.10363	0.467665	12.0174				1179.59	1179.6		98.3073				3	3					3.17523	13.648					6.273	5.131					98.3073	90.2514
822602	Aa2-041 [Rattus norvegicus] [MASS=184459]	K.KAEGEPQEES*PLKSK.S	S318*	0.909713	4.5412	33086522	Q9NYF8	16544	412876	Cdk5_Kin (S175) 0.84%	5.41759e+06	6.27497e+06	1.0422e+07	7.70309e+06	1.89386e+06	784479	0.863365	1.35296	2.41417	868.913	868.912	868.913	868.91	868.911		64.3411	2	2	2	2	2		5.26249	3.50642	4.62915	1.46821	3.1552		3.8424	4.5412	4.1015	4.0708	3.8684		64.3411	33.4593	34.6358	44.3847	52.0794
822605	Aa2-041 [Rattus norvegicus] [MASS=184459]	K.KAEGEPQEES*PLKSK.S	S318*	0.126669	5.6149	33086522	Q9NYF8	16544	412876	Cdk5_Kin (S175) 0.84%	6.69564e+06	6.81772e+06	2.09285e+07	15151859	4.71837e+06	1.31572e+06	0.982095	1.38125	3.58615	579.61	579.609	579.61	579.609	579.61		54.6281	3	3	3	3	3		2.23398	1.49699	3.08035	0.863651	3.18399		5.1112	5.1141	5.0759	5.6149	5.0905		46.9117	47.8353	42.9663	53.9345	54.6281
822638	Aa2-041 [Rattus norvegicus] [MASS=184459]	K.KAEGEPQEES*PLK.S	S318*	0.427158	4.9083	33086522	Q9NYF8	16544	412876	Cdk5_Kin (S175) 0.84%	1.24324e+07	1.51359e+07	1.59606e+07	1.25923e+07	6659387	5.19695e+07	0.82138	1.26749	0.12814	761.346		761.346	761.346	761.351	761.351	100	2		2	2	2	2	0.82803		0.506018	0.427158	7.00535	7.16307	4.9083		4.7857	4.8492	4.7506	4.3794	100		100	100	100
823296	Aa2-041 [Rattus norvegicus] [MASS=184459]	K.KAEGEPQEES*PLK.S	S318*	0.499447	3.9915	33086522	Q9NYF8	16544	412876	Cdk5_Kin (S175) 0.84%	1.61885e+06	4.83709e+06	7.56151e+06	6.20836e+06	260361	1.05935e+07	0.334674	1.21796	0.0245775	507.9		507.9	507.9	507.903	507.903	100	3		3	3	3	3	1.55748		1.61663	1.74149	6.49277	7.51793	2.9511		3.9915	3.5722	3.7871	3.8263	100		100	100	100
826251	Aa2-041 [Rattus norvegicus] [MASS=184459]	K.AEGEPQEES*PLK.S	S318*	2.29623	3.7982	33086522	Q9NYF8	16544	412876	Cdk5_Kin (S175) 0.84%	1.88409e+07	3.17408e+06	15650.5	587232	632854	3.72061e+06	5.93586	0.0266513	0.170094	697.3	697.301	697.301				100	2	2	2				3.08555	4.04709	4.31259				3.7533	3.7982	2.6743				100	100	100
826093	Aa2-041 [Rattus norvegicus] [MASS=184459]	K.KAEGEPQEESPLKS*K.S	S322*	0.765771	4.1122	33086522	Q9NYF8	16544	412876		1.95336e+06	6.27497e+06	1.0422e+07	7.70309e+06	1.22668e+06	784479	0.311295	1.35296	1.56369	868.914	868.913					22.5527	2	2					5.82674	4.91128					4.1122	3.7282					20.569	22.5527
822585	Aa2-041 [Rattus norvegicus] [MASS=184459]	K.SATSGDIWPGLSAYDNS*PR.S	S362*	4.38787	4.6654	33086522	Q8K019		412876		3.1809e+06	3.48496e+06	5.41094e+06	1.24171e+07	722279	3.43314e+06	0.912752	0.435764	0.210384	1037.47		1037.46		1037.45		82.8127	2		2		2		18.6313		5.68011		4.38787		4.2375		4.6654		3.9522		56.1562		82.8127		34.3832
822494	Aa2-041 [Rattus norvegicus] [MASS=184459]	R.YSPS*QNS*PIHHIPSR.R	S427S430*	0.61709	3.0753	33086522	Q9NYF8	16544	412876	DNA_PK (S285) 0.19% Cdk5_Kin (S288) 0.27% Cdc2_Kin (S288) 0.38%	5.46803e+06	3.19532e+06	3.55174e+06	707324	4.11752e+06	2.55501e+06	1.71126	5.02138	1.61155			940.4		940.399		26.2915			2		2				2.43644		0.61709				2.6454		3.0753				26.2915		15.3281
823568	Aa2-041 [Rattus norvegicus] [MASS=184459]	R.TDGDWDDQEVLDYFS*DKESAK.Q	S526	0.25167	5.8536	33086522			412876		4.06639e+06	73889.7	712526	5.23424e+06	109933	3.62004e+06	55.0333	0.136128	0.030368	848.35	848.354	848.343	848.343		848.346	36.4844	3	3	3	3		3	8.11629	12.835	0.644904	0.25167		4.55363	5.1744	5.1285	5.8536	5.4406		5.5954	20.5843	11.2115	18.3674	21.741
825518	Aa2-041 [Rattus norvegicus] [MASS=184459]	K.GRTDGDWDDQEVLDYFS*DKESAK.Q	S526	0.0217696	6.6381	33086522			412876		62214.8	50040.3	3.20559e+06	3.82709e+06	13134.6	416223	1.2433	0.837604	0.0315565			919.388	919.388			33.1676			3	3					5.10132	5.23194					5.8438	6.6381					26.4844	33.1676
825301	Aa2-041 [Rattus norvegicus] [MASS=184459]	K.FHDS*EGDDTEETEDYR.Q	S538*	2.65223	6.259	33086522	Q8K019		412876		1.31332e+07	4.72907e+06	205781	4.12548e+06	174160	1.51211e+06	2.77713	0.0498806	0.115177	1012.86	1012.87		1012.86			138.021	2	2		2			7.77886	11.4534		5.06245			6.259	4.8884		6.2338			138.021	138.021		125.869
827039	Aa2-041 [Rattus norvegicus] [MASS=184459]	K.FHDS*EGDDTEETEDYR.Q	S538*	3.45729	4.2076	33086522	Q8K019		412876		ND	2.39056e+06	18061.2	1.77818e+06	127116	18913.3	4.18313e-07	0.0101571	6.721		675.578					17.8444		3						7.70971						4.2076						17.8444
825799	Aa2-041 [Rattus norvegicus] [MASS=184459]	K.EVQS*PEQVK.S	S637*	0.106809	2.4366	33086522	Q8K019		412876	p38_Kin (S492) 0.4%	831694	520833	615926	505346	3.18663e+06	54721	1.59685	1.21882	58.2341		562.257	562.257				100		2	2					2.82152	3.25766					2.3737	2.4366					100	100
822344	Aa2-041 [Rattus norvegicus] [MASS=184459]	K.ELFDYS*PPLHK.S	S653*	0.0420862	2.8385	33086522	Q8K019		412876		525432	1.38277e+06	3.48795e+06	182217	3.2285e+06	2.54193e+06	0.379984	19.1417	1.2701	713.33	713.326	713.328		713.331		30.193	2	2	2		2		5.17658	0.0420862	2.95304		6.80389		2.8385	2.6087	2.2439		2.4177		30.193	30.193	13.8917		16.9461
826231	Aa2-041 [Rattus norvegicus] [MASS=184459]	K.NT*PSQHSHSIQHS*PER.S	T397S408*	2.04816	2.9588	33086522	Q9NYF8	16544	412876	Cdc2_Kin (S266) 0.67% Cdk5_Kin (S266) 0.86%	849023	921636	4362.75	22375.9	26206.4	4318.83	0.921213	0.194976	6.06794	667.938						46.7809	3						2.04816						2.9588						46.7809
826109	Aa2-041 [Rattus norvegicus] [MASS=184459]	R.TDGDWDDQEVLDY*FSDKESAK.Q	Y524	1.23869	4.9007	33086522			412876		15017.4	60166.3	691378	5.23424e+06	14407.5	12094.7	0.249597	0.132088	1.19122		848.345		848.344			24.4059		3		3				3.0043		1.23869				4.2172		4.9007				24.4059		10.9255
825845	Aa2-141 [Rattus norvegicus] [MASS=28772]	K.HPASAQSSPSSTPHS*SPK.Q	S144	3.86133	4.9393	33086504			404784		2850.65	2.6013e+06	71931.2	203921	797.167	93.4	0.00109585	0.35274	8.53498			623.945	623.945			11.9539			3	3					3.90412	3.86133					4.9393	4.2621					9.55447	11.9539
825967	Aa2-141 [Rattus norvegicus] [MASS=28772]	R.EEKHPASAQSSPSSTPHSS*PK.Q	S145	7.60635	3.3412	33086504			404784	Cdk5_Kin (S145) 0.03% Cdc2_Kin (S145) 0.06%	311766	ND	126284	197.85	343.767	ND	311766	638.28	343.767			752.675				12.0862			3						7.60635						3.3412						12.0862
826975	Ab1-119 [Rattus norvegicus] [MASS=27875]	R.S*SSSEEASQELESDDG.-	S230	6.69694	3.0178	33086458			416348		738703	7.71123e+06	114598	991700	343998	6347.97	0.0957958	0.115557	54.1903	868.81						12.2185	2						6.69694						3.0178						12.2185
826830	Ab1-119 [Rattus norvegicus] [MASS=27875]	R.SSS*SEEASQELESDDG.-	S232	0.092134	3.5844	33086458			416348	Clk2_Kin (S232) 0.39%	1.51604e+06	1.57895e+06	164026	1.20894e+06	63620.1	7984.63	0.960154	0.135678	7.96781	868.805						-0.222764	2						0.092134						3.5844
826913	Ab1-119 [Rattus norvegicus] [MASS=27875]	R.SSSS*EEASQELESDDG.-	S233	4.87156	3.9768	33086458			416348		640848	1.55447e+06	168234	1.27506e+06	56497.2	5293.5	0.412262	0.131942	10.6729	868.809						10.7918	2						4.87156						3.9768						10.7918
826422	Ab1-119 [Rattus norvegicus] [MASS=27875]	R.SSSSEEASQELES*DDG.-	S242	4.12877	3.4303	33086458			416348		7211.3	767275	17252.2	83408.9	9536.37	ND	0.00939859	0.206838	9536.37		868.809					105.088		2						5.22282						3.4303						105.088
826138	Ab2-292 [Rattus norvegicus] [MASS=67930]	K.EELEQQT*DGDCDEEDDDKDGEMPK.S	T582	0.0791184	6.3677	33086592			400114		2.99594e+07	1.0603e+07	1.63611e+07	8.01316e+06	501285	13279.5	2.82557	2.04178	37.7489	969.691	969.694	969.684	969.685			100	3	3	3	3			8.58256	11.5443	1.38285	2.34947			6.132	3.7123	6.3677	5.7786			100	100	100	100
821878	Ab2-404 [Rattus norvegicus] [MASS=157988]	K.ADASS*TENILYK.V	S103	2.85999	3.9068	33086604			416930		1.27989e+06	1.28465e+06	1.0939e+06	3.07873e+06	851084	1.9539e+06	0.996292	0.355311	0.435582	696.312	696.313	696.31	696.311	696.312		22.4677	2	2	2	2	2		4.93671	6.34513	3.18336	4.29717	5.64092		3.9068	2.9072	3.6094	3.291	2.8618		22.4677	19.0849	16.9461	16.9461	12.0862
826500	Ab2-404 [Rattus norvegicus] [MASS=157988]	R.DSCSS*PPSLNYGK.A	S1072	0.851444	4.1538	33086604			416930		6.49044e+06	3.28039e+06	2.15213e+06	3.88215e+06	1.33529e+06	1.0038e+06	1.97855	0.554365	1.33023	746.299	746.298		746.297			27.2803	2	2		2			5.26954	4.69969		2.81579			2.4947	3.3383		4.1538			27.2803	23.8995		16.9461
826272	Ab2-404 [Rattus norvegicus] [MASS=157988]	R.DSCSSPPS*LNYGK.A	S1075	4.86059	3.0617	33086604			416930		2.38846e+06	3.29745e+06	735554	1.57515e+06	790377	544015	0.724335	0.466976	1.45286	746.298						7.97037	2						4.86059						3.0617						7.97037
827390	Ab2-404 [Rattus norvegicus] [MASS=157988]	R.SRSS*PSTDHYSQEVPVEPNR.Q	S831	8.65629	4.6322	33086604			416930		106828	236789	472176	50235.4	451138	79320.7	0.451152	9.39926	5.68752		784.687					-0.457575		3						8.65629						4.6322
825304	Ab2-404 [Rattus norvegicus] [MASS=157988]	R.SRSS*PS*TDHYSQEVPVEPNR.Q	S831S833	3.8898	4.8437	33086604			416930		7.35541e+06	962207	4.20072e+06	1.23448e+06	1025.87	256922	7.64431	3.40282	0.00399291				811.339			9.49991				3						3.8898						4.8437						9.49991
827415	Ab2-404 [Rattus norvegicus] [MASS=157988]	R.SSPS*TDHYSQEVPVEPNR.Q	S833	4.66119	2.8077	33086604			416930		1.04592e+06	1.53322e+06	8397.83	113539	1.22929e+06	67942.9	0.682171	0.073964	18.093		1054.96					-0.132283		2						14.3865						2.8077
822594	ABC50 [Rattus norvegicus]	K.GAEQGS*EEEKEEKEGEVK.A	S203	0.0579187	4.2395	10863747	Q6MG08		395553	Casn_Kin2 (S203) 0.32%	7.4644e+07	9.29006e+07	8.0098e+07	1.01012e+08	9.96956e+07	2.18639e+07	0.803482	0.792959	4.55983	691.297	691.296	691.296	691.299	691.298	691.302	100	3	3	3	3	3	3	3.38823	1.88718	1.18251	5.14991	4.01085	10.2853	3.9305	4.2395	4.2266	4.0303	3.8634	3.7382	100	100	100	100	100
824457	ABC50 [Rattus norvegicus]	K.GAEQGS*EEEKEEK.E	S203	1.76516	3.399	10863747	Q6MG08		395553	Casn_Kin2 (S203) 0.32%	8755.7	16975.3	10104.1	214318	31538.1	83590.3	0.51579	0.0471454	0.377294	765.305	765.308	765.308	765.306	765.319		100	2	2	2	2	2		1.76516	5.8054	4.92937	3.32766	19.7695		2.2725	3.1426	3.399	3.3972	3.1508		100	100	100	100	100
824489	ABC50 [Rattus norvegicus]	K.GAEQGS*EEEKEEK.E	S203	1.88284	3.0698	10863747	Q6MG08		395553	Casn_Kin2 (S203) 0.32%	7103.38	44369.7	47246.6	21694	65458.1	115.467	0.160095	2.17786	566.901		510.539		510.54	510.543		100		3		3	3			2.06589		2.54314	9.36837			3.0698		2.8911	2.5268			100		100	100
823379	ABC50 [Rattus norvegicus]	K.QLS*VPAS*DEEDEVPVPVPR.G	S80S84*	11.1652	3.5764	10863747	Q6MG08		395553	Cam_Kin2 (S80) 0.39% ATM_Kin (S84) 0.63%	156589	304907	3427.25	295064	143136	1.84263e+06	0.513563	0.0116153	0.0776801						1112	100						2						14.0216						3.5764
821956	ABC50 [Rattus norvegicus]	K.QLSVPAS*DEEDEVPVPVPR.G	S84*	0.200654	3.9899	10863747	Q6MG08		395553	ATM_Kin (S84) 0.63%	5.07427e+07	5.58679e+07	9.99618e+07	1.27169e+08	1.83484e+08	1.62994e+08	0.908261	0.786056	1.12571	1072.01	1072.01	1072	1072.01	1072.01	1072.02	62.2536	2	2	2	2	2	2	6.92017	6.12223	2.58049	3.61642	10.1119	14.0969	3.9495	3.5187	3.7666	3.8445	3.8111	3.9899	49.1569	51.5287	62.2536	58.0006	44.7993
823372	ABC50 [Rattus norvegicus]	K.QLSVPAS*DEEDEVPVPVPR.G	S84*	1.47457	4.0583	10863747	Q6MG08		395553	ATM_Kin (S84) 0.63%	7939525	8.17108e+06	5.80939e+06	4.13505e+06	1.69417e+07	1.98933e+07	0.971661	1.40491	0.851631	715.007	715.013	715.005	715.004		715.012	40.4863	3	3	3	3		3	4.54969	13.6069	2.58516	1.47457		12.2397	3.3636	3.5756	2.8723	2.9238		4.0583	39.6687	29.0347	20.923	40.4863
825371	Abelson murine leukemia viral (v-abl) oncogene homolog 2 (mapped) [Rattus norvegicus] [MASS=131470]	R.DKS*PSSLLEDAK.E	S629*	0.722825	2.9264	149058323	P42684	1259		Clk2_Kin (S595) 0.87%	998712	3.1641e+06	767673	912085	51324.5	26254.7	0.315639	0.841668	1.95487	685.316			685.315			22.4115	2			2			0.722825			1.32883			2.8983			2.9264			22.4115			11.3033
825673	ABTAP [Rattus rattus] [MASS=97534]	R.DTTDLSVEAS*PK.G	S180	1.77271	4.0134	42491219			410307	Cdk5_Kin (S180) 0.35% Cdc2_Kin (S180) 0.7%	4.54643e+06	1.96705e+06	3.54626e+06	2.93917e+06	819509	673759	2.31129	1.20655	1.21632	671.796	671.795		671.795			80.4819	2	2		2			6.13741	3.50072		3.5901			3.2921	2.6936		4.0134			46.4558	52.9315		80.4819
823097	ABTAP [Rattus rattus] [MASS=97534]	K.DGATS*EEETELEK.Q	S686	1.26516	3.9514	42491219				Casn_Kin2 (S686) 0.63%	2.33557e+07	1.92052e+07	1.55029e+07	1.35784e+07	3.45866e+06	7.79759e+06	1.21611	1.14173	0.443555	759.303	759.304	759.301	759.301	759.313		33.8039	2	2	2	2	2		6.97812	7.21534	3.8416	3.75594	18.9639		3.916	3.8718	3.6435	3.9514	3.9378		30.193	33.8039	33.8039	33.8039	33.8039
825186	ABTAP [Rattus rattus] [MASS=97534]	K.DGAT*SEEETELEK.Q	T685	1.93069	2.9223	42491219				Casn_Kin2 (T685) 0.31%	1.87756e+06	4.74759e+06	1559374	442422	923335	604579	0.395476	3.52463	1.52724				759.3			16.8124				2						1.93069						2.9223						16.8124
822195	Ac1002 [Rattus norvegicus] [MASS=93847]	K.EFGATECINPQDFS*K.S	S741	2.16707	5.61	32264595	P11766	64	408418		262176	785636	503337	1.03821e+06	878301	1.14629e+06	0.333712	0.484813	0.766209		911.878	911.879		911.875	911.888	121.166		2	2		2	2		7.05528	8.66273		3.97204	18.6365		5.61	4.6305		2.3505	2.5616		100.979	105.475		77.5281
825916	Ac2-155 [Rattus norvegicus] [MASS=102062]	R.RDS*FSENEK.Q	S799	2.50111	2.8242	33086620			402184	Akt_Kin (S550) 0.02% Clk2_Kin (S550) 0.13% PKA_Kin (S550) 0.3% PKC_epsilon (S550) 0.36%	731965	800960	372089	735168	19219.4	5441.13	0.913859	0.506128	3.53224			596.24	596.239			27.6042			2	2					3.83559	2.50111					2.8205	2.8242					22.6067	27.6042
823281	Ac2-155 [Rattus norvegicus] [MASS=102062]	R.S*PDRGVSQSSTQEEPTSK.K	S92	3.42523	4.6728	33086620			402184	Cdk5_Kin (S92) 0.59% Cdc2_Kin (S92) 0.8%	9.22284e+06	2774868	1.56758e+06	2.4531e+06	923502	225250	3.3237	0.63902	4.0999		667.295			667.298	667.294	7.53161		3			3	3		5.16533			9.83559	3.42523		3.9312			4.6728	4.0862		5.31908			2.9243
823282	Ac2-155 [Rattus norvegicus] [MASS=102062]	R.S*PDRGVSQSSTQEEPTSK.K	S92	1.54011	3.7916	33086620			402184	Cdk5_Kin (S92) 0.59% Cdc2_Kin (S92) 0.8%	ND	801516	705562	623875	464266	6557.6	1.24764e-06	1.13094	70.7981		1000.44	1000.43		1000.44		38.1697		2	2		2			8.71553	1.54011		4.07527			3.2568	3.0025		3.7916			27.9039	38.1697		25.1055
822274	Ac2-269 [Rattus norvegicus] [MASS=37728]	R.KES*PPPLVPPAAR.E	S5	0.097307	4.0008	32527757			404572		4.46179e+07	1.09451e+08	1.42875e+08	7.15458e+07	2.6432e+08	1.36254e+08	0.40765	1.99697	1.93991	719.879	719.88	719.88	719.879	719.888	719.882	100	2	2	2	2	2	2	3.57949	5.61597	4.51085	3.6629	15.5411	7.22152	3.875	4.0008	3.4234	3.6676	3.9607	3.4996	100	100	100	100	100
823237	acetyl-CoA carboxylase [Rattus norvegicus]	R.MAMPINVS*DPDLLR.H	S1338	1.55592	4.4323	3080546			395500		2.26192e+06	2.80205e+06	3.68362e+06	4.4248e+06	1.03244e+07	1.34789e+06	0.807238	0.832494	7.65964	826.393	826.395	826.385	826.385	826.395	826.395	100	2	2	2	2	2	2	12.3443	15.226	2.73647	2.96047	14.4147	14.7114	4.4323	4.1635	4.4292	4.3478	4.3426	2.8904	100	100	100	100	100
823251	acetyl-coenzyme A carboxylase [Rattus norvegicus]	R.FIIGSVS*EDNS*EDEISNLVK.L	S25S29*	7.21013	4.7613	11559962	Q9TTS3	1938	413245	Casn_Kin2 (S29) 0.23% DNA_PK (S29) 0.79%	155222	36503	1.9012e+06	1.71954e+06	2.50668e+06	301007	4.25232	1.10564	8.32763					1178.01		55.2078					2						7.21013						4.7613						55.2078
822223	acetyl-coenzyme A carboxylase [Rattus norvegicus]	R.FIIGSVSEDNS*EDEISNLVK.L	S29*	0.712076	6.4227	11559962	Q9TTS3	1938	413245	Casn_Kin2 (S29) 0.23% DNA_PK (S29) 0.79%	1.86888e+06	1.47235e+06	6.79437e+06	8.83943e+06	1.68549e+07	1.39348e+06	1.26931	0.768644	12.0956	1138.04	1138.04	1138.02	1138.03	1138.04	1138.04	80.3839	2	2	2	2	2	2	15.6303	14.9841	1.99996	4.57573	16.272	11.8722	5.8997	5.5217	5.6728	6.0447	6.4227	6.1629	75.8279	57.7661	39.3481	71.7261	65.2179
823241	acetyl-coenzyme A carboxylase [Rattus norvegicus]	R.FIIGSVSEDNS*EDEISNLVK.L	S29*	13.0765	3.9377	11559962	Q9TTS3	1938	413245	Casn_Kin2 (S29) 0.23% DNA_PK (S29) 0.79%	137285	22230.5	144276	802162	1.59147e+06	1.44187e+06	6.17551	0.179858	1.10375					759.027		5.56899					3						13.0765						3.9377						5.56899
822288	acetyl-coenzyme A carboxylase [Rattus norvegicus]	R.SSMS*GLHLVK.Q	S79*	0.342546	3.7022	11559962	Q9TTS3	1938	413245		2.25455e+07	4.85745e+07	2.64796e+07	3.15512e+07	7.50107e+07	6.59893e+07	0.464143	0.839258	1.13671	569.772	569.771	569.771	569.771	569.779	569.772	55.2084	2	2	2	2	2	2	3.4518	2.48565	2.05527	0.983721	15.3529	3.5572	3.5124	3.4384	3.3772	3.4663	3.3571	3.7022	44.9354	47.7991	44.9354	55.2084	34.6479
821934	acidic calcium-independent phospholipase A2 [Rattus norvegicus]	R.DFT*PVCTTELGR.A	T44*	0.887759	4.5542	2317735	O77834	3817	407906		1.6841e+06	3.0868e+06	1.68452e+06	1.95579e+06	6.1666e+06	4.32392e+06	0.545582	0.8613	1.42616	738.322	738.32	738.32	738.321	738.324	738.319	75.8279	2	2	2	2	2	2	8.66067	6.83774	6.09908	7.25112	12.0558	4.6082	3.9764	4.1907	3.8602	4.5542	4.0194	3.8088	58.4756	71.3744	71.7261	61.305	67.4031
823025	Acin1_predicted protein [Rattus norvegicus] [MASS=59841]	R.TAQVPS*PPR.G	S180*	0.203392	2.7415	60688451	Q9UKV3	5191	403006	Cdk5_Kin (S246) 0.73% Cdc2_Kin (S246) 0.84%	3.05151e+07	2.66306e+07	1.24977e+07	8.28518e+06	1.99129e+06	1.73868e+07	1.14587	1.50844	0.114529	516.748	516.748	516.748	516.747	516.75		83.8372	2	2	2	2	2		0.910422	2.09203	1.02665	0.319616	5.75306		2.7203	2.6417	2.7057	2.7415	2.3756		78.7344	82.0812	83.8372	78.7344	52.1871
826430	Actin binding LIM protein family, member 3 [Mus musculus]	R.ASS*PGYIDSPTYSR.Q	S373	3.04302	3.7403	62825940	O94929	12411			2.76308e+06	777824	912586	114889	25654.2	27123.8	3.55232	7.94321	0.94582	790.841	790.84					9.08485	2	2					7.75618	6.1303					3.7403	3.0889					9.08485
821865	Actin-binding LIM protein 1 [Rattus norvegicus] [MASS=48700]	R.TLS*PTPSAEGFQDGR.D	S115	0.669624	4.9071	76779373			402873		2.15954e+06	3.40674e+06	904221	736485	1.16172e+06	1.12432e+06	0.633904	1.22775	1.03327	821.864	821.865	821.861	821.86	821.863		26.0224	2	2	2	2	2		6.24573	6.91535	1.93582	0.669624	5.27783		4.4001	4.2781	4.9071	4.1995	4.0754		26.0224	22.1525	26.0224	14.8319	12.342
828059	Actin-binding LIM protein 1 [Rattus norvegicus] [MASS=48700]	R.STS*QGSINSPVYSR.H	S136*	4.98499	3.8962	76779373	O14639	3819	402873		201730	245805	319326	384159	59823.1	358039	0.82069	0.831232	0.167086			781.85	781.852			10.6145			2	2					4.98499	7.56385					3.7517	3.8962						10.6145
827008	Actin-binding LIM protein 1 [Rattus norvegicus] [MASS=48700]	K.TSS*LPGYGK.N	S304*	5.92254	2.8417	76779373	Q8K4G5		402873	1433_m1 (S174) 0.65%	2.13286e+06	2.40447e+06	757934	1.24284e+06	247613	935764	0.887042	0.60984	0.26461	495.224						21.742	2						5.92254						2.8417						21.742
822617	activator of G-protein signaling 3 [Rattus norvegicus]	R.APS*SDEECFFDLLSK.F	S467	9.78212	5.7095	6448792			405797		70259.3	45055	10873.5	41673.1	891343	189194	1.55941	0.260923	4.71127					912.882	912.891	33.8917					2	2					9.78212	19.4819					5.7095	4.0987					33.8917
823274	activator of G-protein signaling 3 [Rattus norvegicus]	R.APS*S*DEECFFDLLSK.F	S467S468	6.79365	4.7979	6448792			405797		128510	24344.4	ND	22086.5	149888	4824.67	5.27885	4.52766e-05	31.0669					952.863		145.871					2						6.79365						4.7979						145.871
823287	actopaxin [Rattus norvegicus]	K.SPSVPKS*PTPK.S	S14*	3.23759	3.4805	13526899	Q9NVD7	16283	404166	Cdc2_Kin (S14) 0.11% Erk1_Kin (S14) 0.13% Cdk5_Kin (S14) 0.17% GSK3_Kin (S14) 0.89%	ND	ND	ND	10489.7	50662.1	ND	1	9.53316e-05	50662.1					402.205		7.34686					3						3.23759						3.4805						7.34686
822059	actopaxin [Rattus norvegicus]	K.SPTPKS*PPSR.K	S19*	1.95847	2.9179	13526899	Q9NVD7	16283	404166	Cdc2_Kin (S19) 0.01% Cdk5_Kin (S19) 0.01% Erk1_Kin (S19) 0.41%	1.373e+06	452712	1.66225e+06	2.65626e+06	113240	56661	3.03283	0.625787	1.99854		567.273	567.273	567.272	567.272		22.043		2	2	2	2			4.00515	3.67874	1.95847	2.06433			2.6975	2.6694	2.38	2.9179			22.043	15.9852	18.4321	17.2389
824751	acyl Coenzyme A dehydrogenase, long chain [Rattus norvegicus]	R.IFS*SEHDIFR.E	S54	1.42794	2.9512	6978431	Q60HI0		402463		19610.3	796106	725807	927787	ND	1.00669e+06	0.0246328	0.782299	9.93356e-07		665.798	665.797			665.798	23.8995		2	2			2		5.103	2.6229			4.63704		2.6978	2.9512			2.6524		23.8995	23.8995
822332	acyl Coenzyme A dehydrogenase, long chain [Rattus norvegicus]	R.IFSS*EHDIFR.E	S55	1.33776	3.19	6978431	Q60HI0		402463		886357	2.56131e+06	1.47834e+06	473821	6.16725e+06	559332	0.346057	3.12003	11.0261	665.796	665.798	665.796	665.797	665.8		30.193	2	2	2	2	2		1.7962	3.81786	1.42794	2.25465	7.48539		2.9974	2.9705	3.19	2.9249	2.9213		25.5751	27.6042	30.193	25.5751	30.193
822724	acyl-coA oxidase [Rattus norvegicus]	R.RQS*EIKQSEPEPQILDFQTQQYK.L	S310	1.86527	7.1148	8394149	P07872		400165	PKA_Kin (S310) 0.59%	54494.3	1.1971e+06	2.32911e+06	9.05875e+06	5.74996e+06	2.06989e+06	0.0455218	0.257111	2.7779	967.453	967.476	967.47	967.471	967.484	967.47	52.4156	3	3	3	3	3	3	13.3053	10.8295	4.27873	5.09585	19.2385	4.40285	5.461	5.9889	6.8567	6.7796	7.1148	6.674	28.653	46.1732	46.1732	52.4156	46.1003
821828	acyl-CoA synthetase short-chain family member 2 (predicted) [Rattus norvegicus] [MASS=78887]	R.AELGMNDS*PSQSPPVK.R	S263*	0.880952	5.3443	149030886	Q9QXG4		405936		2.04842e+07	3.14083e+07	2.86392e+06	3.3775e+06	2.36358e+07	1.79981e+07	0.65219	0.847942	1.31324	868.889	868.888	868.883	868.888	868.884	868.896	34.6479	2	2	2	2	2	2	8.18761	7.62335	0.950046	7.27213	3.1956	15.9893	5.225	4.4869	4.2437	4.7917	4.5772	5.3443	22.4677	26.4292	34.6479	31.9863	19.0849
823357	acyl-CoA synthetase short-chain family member 2 (predicted) [Rattus norvegicus] [MASS=78887]	R.AELGMNDS*PSQS*PPVK.R	S263S267*	4.72277	4.3905	149030886	Q9QXG4		405936	Cdc2_Kin (S267) 0.49% Cdk5_Kin (S267) 0.56%	7.9271e+06	3.42558e+06	531922	3.87273e+06	3.04958e+06	5.2752e+06	2.31409	0.137351	0.578097	908.873	908.869			908.882	908.879	32.1312	2	2			2	2	8.57581	4.72277			19.1715	15.6103	4.2493	3.8366			4.3905	4.3774	32.1312	19.0849			29.8287
822166	acyl-CoA synthetase short-chain family member 2 (predicted) [Rattus norvegicus] [MASS=78887]	R.AELGMNDSPS*QSPPVK.R	S265*	0.0345472	4.6728	149030886	Q9QXG4		405936		1.18831e+08	3.14788e+07	2.89219e+06	3.38248e+06	2.36836e+07	3.76935e+06	3.77494	0.85505	6.2832	868.886	868.892	868.884	868.884	868.882	868.887	19.0849	2	2	2	2	2	2	5.02659	11.4638	2.25132	2.8271	0.0345472	6.50058	4.6668	4.5389	4.43	3.7494	4.4901	4.6728	10.8814	10.8814	19.0849	13.9358	9.0759
823443	acyl-CoA synthetase short-chain family member 2 (predicted) [Rattus norvegicus] [MASS=78887]	R.AELGMNDSPS*QS*PPVK.R	S265S267*	0.693556	4.5668	149030886	Q9QXG4		405936	Cdc2_Kin (S267) 0.49% Cdk5_Kin (S267) 0.56%	441881	717510	215615	51062.5	1.51732e+06	2.41943e+06	0.615853	4.22258	0.627141			908.865			908.873	21.6419			2			2			0.693556			8.55379			3.5044			4.5668			21.6419
821842	acyl-CoA synthetase short-chain family member 2 (predicted) [Rattus norvegicus] [MASS=78887]	R.AELGMNDSPSQS*PPVK.R	S267*	0.0345472	5.8112	149030886	Q9QXG4		405936	Cdc2_Kin (S267) 0.49% Cdk5_Kin (S267) 0.56%	2.10702e+07	3.14696e+07	2.89219e+06	2.31411e+06	2.36836e+07	1.8054e+07	0.669539	1.2498	1.31182	868.881	868.888	868.885		868.885	868.885	55.2084	2	2	2		2	2	0.529723	7.62335	3.69078		3.27045	4.1111	4.7759	5.1372	4.695		5.0171	5.8112	44.9354	44.6853	47.7991		39.7221
821877	acyl-CoA synthetase short-chain family member 2 (predicted) [Rattus norvegicus] [MASS=78887]	R.GWS*PPPEVR.R	S30*	0.0362159	3.0886	149030886	Q9QXG4		405936	Akt_Kin (S30) 0.6% 1433_m1 (S30) 0.61%	1.83145e+08	1.06828e+08	65131406	1.13846e+08	3.1678e+08	9.04778e+07	1.71438	0.5721	3.50119	552.749	552.75	552.748	552.75	552.75	552.754	100	2	2	2	2	2	2	3.39523	5.05209	0.516076	4.94345	4.4998	11.2359	2.8221	2.7478	3.0886	2.8611	2.8685	2.9701	100	100	100	100	100
822290	acyl-CoA synthetase short-chain family member 2 (predicted) [Rattus norvegicus] [MASS=78887]	R.VRGWS*PPPEVR.R	S30*	0.0661932	3.5133	149030886	Q9QXG4		405936	Akt_Kin (S30) 0.6% 1433_m1 (S30) 0.61%	7.84593e+07	9.21874e+07	1.49146e+07	1.55281e+07	2.6134e+08	4.46022e+08	0.851085	0.960488	0.585935	680.335	680.334	680.333	680.332	680.338	680.332	100	2	2	2	2	2	2	3.76564	2.96397	1.43418	0.5369	8.88452	0.360385	3.1455	3.2897	3.1419	3.5133	3.1788	3.5058	100	100	100	100	100
823770	acyl-CoA thioesterase 7, isoform CRA_a [Rattus norvegicus] [MASS=40968]	R.LIHSAPGLLDTCSQIPPPPS*PPPPAVAAK.M	S25	0.501906	5.1429	149024729					122483	647765	3.04543e+06	7014686	1.23446e+06	1.06491e+07	0.189085	0.43415	0.115922	1003.52		1003.52	1003.52	1003.52	1003.53	146.79	3		3	3	3	3	2.48958		4.81628	2.82197	9.15721	13.6576	4.1115		4.7856	4.5781	4.7079	5.1429	99.8458		138.46	130.422	133.237
823894	acyl-CoA-binding protein [Rattus norvegicus]	K.AKWDS*WNK.L	S58	7.60893	2.4732	262139	P31786		414002		ND	16441.8	258499	618475	12718.8	1.39102e+06	6.08205e-05	0.417962	0.00914347						1114.48	100						1						7.60893						2.4732
822358	acyl-Coenzyme A oxidase 2, branched chain, isoform CRA_a [Rattus norvegicus] [MASS=82976]	R.VS*LGDTWSWQVHPDIDSER.H	S66	0.884262	2.9878	149040076			399284		90456.4	19828.3	100531	300014	1.3457e+06	1580206	4.56199	0.335089	0.851596	1154.02			1154.02	1154.02	1154.02	32.5438	2			2	2	2	8.29206			8.76886	13.1597	14.7505	2.7565			2.9878	2.4371	2.4022	7.16518			32.5438	16.1979
824041	acyl-Coenzyme A oxidase 2, branched chain, isoform CRA_a [Rattus norvegicus] [MASS=82976]	R.VS*LGDTWSWQVHPDIDSER.H	S66	0.351104	3.0168	149040076			399284		ND	1.12845e+06	ND	509809	1.3666e+06	285039	8.8617e-07	1.96152e-06	4.79443				769.675		769.684	48.5455				3		3				1.06632		12.4142				3.0168		2.7108				48.5455
824586	acyl-Coenzyme A oxidase 2, branched chain, isoform CRA_a [Rattus norvegicus] [MASS=82976]	K.S*PANTQENPAYK.K	S713	14.7112	3.4895	149040076	Q9QXD1		399284		1.92362e+06	343873	19489.1	13261.2	333282	786501	5.594	1.46963	0.423754						700.308	52.2549						2						14.7112						3.4895
823140	acyl-peptide hydrolase [Rattus norvegicus]	K.ALDISAS*DDEMARPK.K	S187	2.41943	4.2469	1619608	P13676		413189		828149	1.20734e+07	1.6206e+06	2.11585e+07	1.04283e+07	215719	0.068593	0.0765934	48.3419		849.886		849.878	849.883		47.4269		2		2	2			13.9925		4.50332	11.114			3.9864		4.2469	4.0825			39.7221		47.4269	41.8699
828016	adaptor protein GRB14 [Mus musculus]	R.SVS*ENSLVAMDFSGEK.S	S370	15.9177	4.2731	7262857	Q9JLM9				217137	680149	6.06815e+06	5.15257e+06	748391	1.39917e+06	0.31925	1.17769	0.53488			890.393				-0.362122			2						15.9177						4.2731
827881	adaptor protein GRB14 [Mus musculus]	R.SVSENS*LVAMDFSGEK.S	S373	13.1084	5.0331	7262857	Q9JLM9				349292	947852	5.54168e+06	4.32478e+06	739548	1.39314e+06	0.368509	1.28138	0.53085			890.391				9.12045			2						13.1084						5.0331						9.12045
823571	adaptor-related protein complex 3, delta 1 subunit, isoform CRA_a [Rattus norvegicus] [MASS=112971]	K.KVPVPEGLDLDAWINEPPS*DS*ES*EDEKPK.A	S632S634S636	3.22211	8.519	149034505			406055	Casn_Kin2 (S636) 0.09% GSK3_Kin (S632) 0.38% DNA_PK (S636) 0.79%	156714	1.03281e+06	6.70743e+06	3.60135e+06	1.48674e+06	1.13244e+07	0.151735	1.86247	0.131286	1154.16	1154.18		1154.16		1154.17	100	3	3		3		3	6.502	19.2023		5.44435		12.6398	5.9046	5.6898		8.519		7.2156	100	100		100
826920	adaptor-related protein complex 3, delta 1 subunit, isoform CRA_a [Rattus norvegicus] [MASS=112971]	R.HS*SLPT*ES*DEDIAPAQR.V	S754T758S760	7.35385	3.4058	149034505			406055	PKA_Kin (S754) 0.48% DNA_PK (S760) 0.76%	2.98048e+06	1.53621e+06	5.1797e+06	779883	634787	103552	1.94015	6.64164	6.13015	1046.9						52.8957	2						8.28562						3.4058						52.8957
822946	adaptor-related protein complex 3, delta 1 subunit, isoform CRA_a [Rattus norvegicus] [MASS=112971]	R.HSS*LPTES*DEDIAPAQR.V	S755S760	0.561407	5.5515	149034505			406055	1433_m1 (S755) 0.03% Akt_Kin (S755) 0.27% DNA_PK (S760) 0.76%	2.24386e+06	1.21848e+07	9.71832e+06	9.69453e+06	1.7231e+06	552667	0.184153	1.00245	3.11779	1006.91	1006.91	1006.91	1006.9	1006.91		32.2355	2	2	2	2	2		4.32232	7.59633	2.57352	1.08307	5.41531		5.1661	4.2912	4.5078	4.8061	5.5515		27.0871	24.0327	32.2355	30.8748	27.6752
826919	adaptor-related protein complex 3, delta 1 subunit, isoform CRA_a [Rattus norvegicus] [MASS=112971]	R.HSS*LPT*ES*DEDIAPAQR.V	S755T758S760	1.05602	4.5463	149034505			406055	1433_m1 (S755) 0.03% Akt_Kin (S755) 0.27% DNA_PK (S760) 0.76%	2.98048e+06	1.53621e+06	5.19942e+06	824472	643161	103552	1.94015	6.30636	6.21101	1046.89		1046.89				45.0828	2		2				4.90258		1.05602				4.0528		4.5463				39.2875		45.0828
822270	adaptor-related protein complex 3, delta 1 subunit, isoform CRA_a [Rattus norvegicus] [MASS=112971]	R.HSSLPTES*DEDIAPAQR.V	S760	0.0258688	6.4801	149034505			406055	DNA_PK (S760) 0.76%	2.7708e+07	2.18088e+07	4.56262e+07	5.32684e+07	5.92245e+07	52408182	1.27049	0.856535	1.13006	966.923	966.927	966.924	966.926	966.93	966.923	44.6853	2	2	2	2	2	2	2.55583	6.72066	3.75613	6.15155	10.1301	2.55583	6.1731	6.4801	5.3696	5.9893	6.4308	6.0716	44.6853	44.6853	39.2689	44.6853	44.6853
822273	adaptor-related protein complex 3, delta 1 subunit, isoform CRA_a [Rattus norvegicus] [MASS=112971]	R.HSSLPTES*DEDIAPAQR.V	S760	0.08278	4.127	149034505			406055	DNA_PK (S760) 0.76%	1.17861e+07	1.48887e+07	3.4499e+06	9.7445e+06	9.05788e+06	8.55425e+06	0.791614	0.354036	1.05887	644.95	644.951	644.952	644.95	644.962	644.957	32.6992	3	3	3	3	3	3	0.843321	3.02146	3.77682	1.50556	19.3132	11.17	3.6429	4.127	3.2728	3.8757	3.3773	3.0744	29.7187	32.6992	7.87106	13.1326	16.2197
822352	adaptor-related protein complex 3, delta 1 subunit, isoform CRA_a [Rattus norvegicus] [MASS=112971]	R.VDIITEEMPENALPS*DEDDKDPNDPYR.A	S784	0.422224	6.0268	149034505			406055		1.07927e+07	6.9909e+06	5.66303e+06	5.53647e+07	2.48516e+07	1.08646e+07	1.54382	0.102286	2.28739	1066.46		1066.46	1066.45	1066.46		61.663	3		3	3	3		6.37711		5.18239	1.52627	7.29349		5.9435		6.0268	5.5181	5.7389		42.2922		42.7435	47.3706	61.663
823101	adaptor-related protein complex 3, delta 1 subunit, isoform CRA_a [Rattus norvegicus] [MASS=112971]	R.HSSLPT*ESDEDIAPAQR.V	T758	1.79011	4.1021	149034505			406055		3.06156e+06	14234.1	3.09261e+07	4.24745e+07	5.86905e+06	1.51132e+06	215.085	0.728109	3.88339				644.95	644.955	644.957	7.15687				3	3	3				1.79011	8.23137	11.9254				4.1021	3.7611	3.2911				4.8632	7.15687
825936	adaptor-related protein complex 3, delta 1 subunit, isoform CRA_a [Rattus norvegicus] [MASS=112971]	R.HSSLPT*ESDEDIAPAQR.V	T758	2.55583	3.8855	149034505			406055		2.76697e+07	2.17352e+07	970153	5.33085e+07	1.33589e+06	4.31302e+07	1.27304	0.0181988	0.0309735	966.93	966.928	966.925				32.8593	2	2	2				10.0939	7.50706	4.51149				2.6017	3.8855	3.4379				32.8593	12.1386	12.1748
823118	adaptor-related protein complex 3, delta 1 subunit, isoform CRA_a [Rattus norvegicus] [MASS=112971]	R.HSSLPT*ES*DEDIAPAQR.V	T758S760	0.228537	5.6929	149034505			406055	DNA_PK (S760) 0.76%	8.69659e+06	1.21738e+07	9.33972e+06	9.6798e+06	7.08687e+06	324256	0.714371	0.964867	21.8558	1006.9	1006.91	1006.91	1006.9	1006.91		67.0183	2	2	2	2	2		0.228537	10.7511	1.59479	1.10791	10.145		5.398	4.8095	4.307	5.6929	4.9985		58.5201	67.0183	21.5922	38.4837	58.5418
827054	adaptor-related protein complex 3, delta 1 subunit, isoform CRA_a [Rattus norvegicus] [MASS=112971]	R.HSSLPT*ES*DEDIAPAQR.V	T758S760	5.19671	4.1609	149034505			406055	DNA_PK (S760) 0.76%	8654.38	6.66461e+06	3.39022e+06	2.01131e+06	572748	4389.07	0.00129856	1.68558	130.494		671.608					4.90969		3						5.19671						4.1609						4.90969
826434	ADD1/SREBP-1c [Rattus norvegicus]	K.VTPAPLS*PPPSAPTAVK.M	S73	5.29272	3.6599	12249193	P56720		416341	Erk1_Kin (S73) 00% p38_Kin (S73) 0.41% GSK3_Kin (S73) 0.43%	878271	526131	ND	222679	14360.4	4805.37	1.6693	4.49077e-06	2.98841		855.452					20.8179		2						5.29272						3.6599						20.8179
824960	adducin 3, gamma [Rattus norvegicus]	R.TEEVLSPDGSPS*KSPSK.K	S646*	1.43027	3.3461	13928748	Q9QYB5		412968		1.45395e+06	2.18544e+06	1.27733e+06	769104	288867	103607	0.665289	1.66081	2.78812			608.948				6.0656			3						1.43027						3.3461						6.0656
822651	adducin 3, gamma [Rattus norvegicus]	K.SPDRTEEVLSPDGSPSKS*PSK.K	S648*	0.17105	6.2827	13928748	Q62847		412968	Cdk5_Kin (S648) 0.01% Cdc2_Kin (S648) 0.01%	1.15682e+06	1.98539e+06	1.37793e+06	1.95151e+06	5.28774e+06	3.01453e+06	0.582665	0.706081	1.75408	760.678	760.684	760.688	760.686	760.688	760.689	29.8287	3	3	3	3	3	3	8.39028	0.495606	4.58762	1.53944	5.07006	6.35511	5.567	6.271	6.2827	6.0492	6.0384	5.6907	16.5348	25.5284	22.1506	29.8287	26.0224
825340	adducin 3, gamma [Rattus norvegicus]	R.TEEVLSPDGSPSKS*PSK.K	S648*	1.507	5.5592	13928748	Q9QYB5		412968	Cdk5_Kin (S648) 0.01% Cdc2_Kin (S648) 0.01%	3.63578e+06	2.12129e+06	1.09303e+06	426481	1.48793e+06	1.43539e+06	1.71395	2.56291	1.03661	912.922	912.927		912.919			35.0978	2	2		2			5.18403	11.4037		2.57558			5.5592	5.2452		4.8986			35.0978	25.5751		19.8227
826249	adducin 3, gamma [Rattus norvegicus]	R.TEEVLSPDGSPSKS*PSK.K	S648*	4.43876	3.8531	13928748	Q9QYB5		412968	Cdk5_Kin (S648) 0.01% Cdc2_Kin (S648) 0.01%	2.58443e+06	ND	ND	ND	176822	2620.33	2.58443e+06	1	67.4809	608.951						4.89808	3						5.94574						3.8531						4.89808
826396	adenine phosphoribosyl transferase (predicted) [Rattus norvegicus]	R.S*FPDFPIPGVLFR.D	S15	8.77986	4.1372	61556832	P47952		403152	1433_m1 (S15) 0.28% Akt_Kin (S15) 0.81%	536182	166436	67264	269268	ND	55985.3	3.22154	0.249803	1.78618e-05	786.394						100	2						9.04071						4.1372						100
821950	adenine phosphoribosyl transferase (predicted) [Rattus norvegicus]	K.IDYIAGLDS*R.G	S66	0.8482	4.7366	61556832	P47952	29			1659961	1.15258e+06	1.30244e+06	1.99011e+06	3.17785e+06	2.05908e+06	1.44021	0.654458	1.54334	601.78	601.777	601.777	601.78	601.781	601.787	134.364	2	2	2	2	2	2	5.72117	1.97082	0.8482	5.92906	7.95806	17.4959	4.3669	3.3786	3.8235	4.2685	4.0868	4.7366	119.826	89.3265	134.364	128.693	120.656
825444	adenosine monophosphate deaminase 2 (isoform L) [Rattus norvegicus]	R.QIS*QDVKLEPDILLR.A	S113*	0.611813	3.3019	156119591	Q01433	11808	416655	Cam_Kin2 (S49) 0.05% ATM_Kin (S49) 0.13% DNA_PK (S49) 0.27%	137502	748022	550019	906870	5483.5	20236	0.183821	0.606502	0.270978			616.328	616.329			100			3	3					0.611813	2.6963					3.3019	2.9571					100	100
824525	adenosine monophosphate deaminase 2 (isoform L) [Rattus norvegicus]	K.TDS*DSDLQLYK.E	S135	1.04795	4.8531	156119591	Q01433	11808	416655		1.63382e+07	7.56806e+06	1.75362e+06	387384	873405	3.42341e+06	2.15883	4.52682	0.255127	682.789	682.789	682.788	682.789		682.798	41.4063	2	2	2	2		2	5.87731	7.30632	5.43029	6.68342		19.1193	4.5562	4.8531	4.5772	4.1098		3.7076	38.3626	35.8493	41.4063	35.8493
824964	adenosine monophosphate deaminase 2 (isoform L) [Rattus norvegicus]	K.TDS*DSDLQLYKEQGEGQGDR.G	S135	2.94707	5.1381	156119591	Q01433	11808	416655		962904	97349.8	69079.2	19503.8	327584	287964	9.89117	3.54183	1.13759	774.327		774.321				16.9024	3		3				4.62738		2.94707				4.5475		5.1381				16.9024		11.9539
825431	adenosine monophosphate deaminase 2 (isoform L) [Rattus norvegicus]	K.QDFLKTDS*DSDLQLYK.E	S135	1.71351	4.4644	156119591	Q01433	11808	416655		37408.7	112015	874183	ND	1011.5	99158.2	0.33396	874183	0.0102009		665.968	665.971				32.6992		3	3					2.60034	1.71351					3.8739	4.4644					10.9255	32.6992
823698	adenylate kinase 3 [Rattus norvegicus]	K.VPETIQKAS*VTP.-	S224	2.51172	3.6857	450312	P29411		403743		878654	3.72059e+06	1.65298e+06	3.04695e+06	688377	2.35953e+06	0.23616	0.542504	0.291743				675.341	675.346	675.348	34.4899				2	2	2				3.1415	10.3802	12.7289				3.6857	3.1076	2.8685				34.4899	32.1312
824032	ADP-ribosylation factor 1 [Rattus norvegicus]	K.LGLHS*LR.H	S147	2.5701	2.5868	438862	P36397	54	411890		445867	242128	45213.8	96043.2	42993.7	365874	1.84146	0.470765	0.11751	438.23					438.232	100	2					2	2.85567					8.29281	2.5868					2.4045	100
823924	ADP-ribosylation factor GTPase activating protein 2 [Rattus norvegicus]	R.HGTDLWIDNMNSAPS*HSPEKK.D	S143	14.807	6.0076	75517323			412590		7.59701e+06	6.79804e+06	1.27327e+06	8471.02	6.4924e+06	3.90996e+06	1.11753	150.309	1.66048						815.374	2.20295						3						14.807						6.0076
822518	ADP-ribosylation factor GTPase activating protein 2 [Rattus norvegicus]	R.HGTDLWIDNMNSAPSHS*PEKK.D	S145	1.22746	6.1945	75517323			412590		7.86442e+06	6.90734e+06	75619.1	12388.7	4539687	4.25898e+06	1.13856	6.10389	1.06591			815.367		815.361	815.36	24.2815			3		3	3			6.33775		1.22746	2.2749			5.1477		6.1945	5.621			13.1326		24.2815
825942	ADP-ribosylation factor GTPase activating protein 2 [Rattus norvegicus]	R.HGTDLWIDNMNSAPSHS*PEKK.D	S145	10.2165	3.7178	75517323			412590		9540.95	5080.35	89486.6	ND	11064	ND	1.87801	89486.6	11064			1222.55				9.0759			2						10.2165						3.7178						9.0759
821852	ADP-ribosylation factor GTPase activating protein 2 [Rattus norvegicus]	K.VSNQS*FTEIER.Q	S239	0.129533	3.9858	75517323			412590		2.48871e+06	1.42527e+06	3.42622e+06	2.7697e+07	2.53599e+06	2.10218e+06	1.74614	0.123704	1.20636	695.311	695.309	695.309	695.309	695.309	695.317	42.4279	2	2	2	2	2	2	6.80765	3.90757	5.05177	4.87906	4.44009	15.8532	3.8357	3.7062	3.8237	2.8756	3.9858	3.797	29.8287	42.4279	39.2689	32.1312	29.8287
824008	ADP-ribosylation factor GTPase activating protein 2 [Rattus norvegicus]	K.SSRS*QLDLFDDVGTFASGPPK.Y	S339	9.20977	4.5523	75517323	Q8N6H7	6069	412590	DNA_PK (S339) 0.46%	ND	ND	50487.6	ND	344937	81479.2	1	50487.6	4.23344						768.703	-0.362122						3						17.1564						4.5523
824581	ADP-ribosylation factor GTPase activating protein 2 [Rattus norvegicus]	R.S*QLDLFDDVGTFASGPPK.Y	S339	10.5729	5.3897	75517323	Q8N6H7	6069	412590	DNA_PK (S339) 0.46%	2.67863e+06	3.91415e+06	ND	201098	712073	1.66419e+06	0.684344	4.9727e-06	0.42788						987.459	156.152						2						10.5729						5.3897
827456	ADP-ribosylation factor guanine nucleotide-exchange factor 1(brefeldin A-inhibited) (predicted), isoform CRA_a [Rattus norvegicus] [MASS=207889]	R.LSVS*SNDTQESGNSSGPSPGAK.F	S393	6.08435	3.831	149060934	O46382	9163	398249		247988	234742	20416.8	283234	146039	414915	1.05643	0.0720846	0.351973	1093.47						3.85606	2						6.08435						3.831						3.85606
827515	ADP-ribosylation factor guanine nucleotide-exchange factor 1(brefeldin A-inhibited) (predicted), isoform CRA_a [Rattus norvegicus] [MASS=207889]	R.LSVSS*NDTQESGNSSGPSPGAK.F	S394	5.52624	3.6581	149060934	O46382	9163	398249		247988	234742	20416.8	283234	138694	519961	1.05643	0.0720846	0.26674		1093.47					22.4677		2						5.52624						3.6581						22.4677
823630	ADP-ribosylation factor-directed GTPase-activating protein 1 [Rattus norvegicus]	R.S*SDSWDIWGSGSASNNK.N	S359	1.18227	5.3099	1130494	Q62848				1.71393e+06	1.22013e+06	2.53467e+06	1.0067e+07	1.88445e+06	895793	1.40471	0.25178	2.10367			939.374	939.373	939.367	939.383	35.3857			2	2	2	2			3.46161	2.74799	3.81845	13.3457			5.3099	4.492	4.8733	4.1162			35.3857	19.8227	29.8287
827989	ADP-ribosylation factor-directed GTPase-activating protein 1 [Rattus norvegicus]	R.SS*DSWDIWGSGSASNNK.N	S360	3.31249	4.3296	1130494	Q62848			PKA_Kin (S360) 0.39%	1.89479e+06	1.08775e+06	6.47646e+06	4.85687e+06	85917.9	235169	1.74194	1.33346	0.365345				939.374			12.1307				2						3.31249						4.3296						12.1307
827962	ADP-ribosylation factor-directed GTPase-activating protein 1 [Rattus norvegicus]	R.SSDS*WDIWGSGSASNNK.N	S362	5.7356	3.3321	1130494	Q62848			Akt_Kin (S362) 0.6%	1898938	1.13524e+06	6465595	4.85687e+06	111435	22743.4	1.67271	1.33123	4.89965				939.376			7.78151				2						5.7356						3.3321						7.78151
825081	ADP-ribosylation factor-like 6 interacting protein 4 [Rattus norvegicus]	R.S*AGEDNDGPVLTDEQK.S	S142	0.775056	5.364	66910579			395723		9.48134e+06	3.31962e+06	6.353e+06	8.97207e+06	946395	2.03268e+06	2.85615	0.708086	0.46559	877.866	877.866	877.86	877.862			102.671	2	2	2	2			7.14072	7.41997	0.775056	2.47903			4.9009	4.3078	5.364	4.9987			99.7485	56.4023	102.671	97.9371
827377	AE binding protein 2 isoform 1 [Mus musculus] [MASS=51960]	R.RGS*LEMSSDGEPLSR.M	S199	0.176395	3.9724	54112427			399959	PKA_Kin (S199) 0.07% Akt_Kin (S199) 0.24% Cam_Kin2 (S199) 0.83%	603353	243993	82455.9	174083	1.42242e+06	1.17079e+06	2.47283	0.473659	1.21492	850.869	850.875					42.6992	2	2					0.176395	6.71471					3.495	3.9724					42.6992	28.9425
823186	AE binding protein 2 isoform 1 [Mus musculus] [MASS=51960]	R.LSPLS*PGS*PGPAAR.G	S21S24	0.0340914	3.6948	54112427			399959	p38_Kin (S24) 0.09% p38_Kin (S21) 0.13% Erk1_Kin (S21) 0.35% Erk1_Kin (S24) 0.71% Cdc2_Kin (S24) 0.76%	2.78754e+06	2.50875e+06	4.58613e+06	8.61796e+06	4.77939e+06	3.08065e+06	1.11113	0.532159	1.55142	733.832	733.833	733.828	733.828	733.838	733.826	59.153	2	2	2	2	2	2	8.35915	10.0228	2.78185	3.03413	16.2614	0.0340914	3.6948	3.6567	3.5488	3.0612	2.9108	2.3703	59.153	47.4998	36.7104	18.4644	57.8957
826847	AE binding protein 2 isoform 1 [Mus musculus] [MASS=51960]	R.LSPLSPGS*PGPAAR.G	S24	7.79555	3.3153	54112427			399959	p38_Kin (S24) 0.09% Erk1_Kin (S24) 0.71% Cdc2_Kin (S24) 0.76%	4.78558e+06	1.91994e+06	1.29646e+06	28702.3	461817	345056	2.49257	45.169	1.33838	693.848						18.8106	2						7.79555						3.3153						18.8106
823053	AF4/FMR2 family, member 4 (predicted) [Rattus norvegicus] [MASS=125682]	R.SSS*PGKPQAVSSLSSSHSR.S	S175	1.08347	4.3042	149052562			398914	Cdk5_Kin (S175) 0.8%	6.87828e+06	6.13255e+06	1.42905e+06	2.16982e+06	5.48856e+06	2.0375e+06	1.1216	0.658602	2.69377	655.973		655.974	655.974	655.979	655.976	10.6145	3		3	3	3	3	1.54636		3.13341	2.85364	9.36965	5.926	3.2009		3.7099	4.0893	4.2314	4.3042	7.90838		7.23456	7.23456	10.6145
823065	AF4/FMR2 family, member 4 (predicted) [Rattus norvegicus] [MASS=125682]	R.SKS*PRDPDANWDSPSR.G	S207*	1.26662	4.5258	149052562	Q9UHB7	9187	398914	Cdc2_Kin (S212) 0.7% Cdk5_Kin (S212) 0.72%	731618	814854	1.48749e+06	1.7228e+06	1.46177e+06	241422	0.897852	0.863415	6.05483	632.277	632.276	632.277	632.276	632.278	632.28	30.3463	3	3	3	3	3	3	3.77873	2.71267	3.72596	3.00293	6.38583	9.09319	4.5258	3.7696	4.1226	4.0865	3.9629	3.678	30.3463	15.1851	30.3463	15.1851	28.396
822437	AHNAK nucleoprotein isoform 1 [Mus musculus] [MASS=604249]	R.LRS*EDGVEGDLGETQSR.T	S136	0.518716	5.0958	61743961			406723		3.6898e+06	6.30486e+06	3.15117e+06	1.0108e+06	3.5254e+06	3.78113e+06	0.585231	3.11751	0.932367	964.431	964.428	964.426	964.426	964.429	964.442	226.397	2	2	2	2	2	2	8.47574	4.92777	2.9048	3.02929	6.06893	19.8094	4.5972	3.9951	5.0958	4.3146	4.3782	4.3636	168.138	163.705	172.2	226.397	134.806
824891	AHNAK nucleoprotein isoform 1 [Mus musculus] [MASS=604249]	R.LRS*EDGVEGDLGETQSR.T	S136	0.114117	5.5238	61743961			406723		3.04896e+06	5.55955e+06	2.62498e+06	688080	3.57203e+06	346352	0.548418	3.81494	10.3133		643.289	643.286	643.285			119.439		3	3	3				6.15711	1.40053	0.114117				4.789	5.5238	4.0329				102.793	119.439	98.5422
825005	AHSG(alpha 2 HS-glycoprotein) homolog/fetuin homolog [Mus sp.]	R.HAFSPVASVES*ASGETLHSPK.V	S312	13.2549	4.4138	248764	P29699				2.31665e+07	3.16782e+07	33425258	1.40924e+07	7.37327e+07	5.06845e+07	0.731307	2.37187	1.45474	740.025		740.021	740.021			44.1903	3		3	3			19.1158		14.1566	14.1566			4.3611		4.1908	4.4138			7.87106		33.224	44.1903
823812	Ajuba protein [Rattus norvegicus] [MASS=58081]	R.SSFASSSASDASKPSS*PR.G	S147	13.8086	4.9411	34874123	-	16426	402496	Cdc2_Kin (S147) 0.51% GSK3_Kin (S147) 0.61% Cdk5_Kin (S147) 0.84%	ND	841644	42445.1	1.21172e+06	100033	1.12006e+06	1.18815e-06	0.0350287	0.08931						918.407	16.9461						2						13.8086						4.9411
822853	Akap9 protein [Rattus norvegicus] [MASS=53690]	R.DGFGLS*PGIEK.T	S368	0.666925	3.1173	71051720			399222		692240	644604	1.38242e+06	1.45484e+06	452237	117286	1.0739	0.95022	3.85584	600.274	600.277			600.271	600.277	100	2	2			2	2	5.55212	9.82872			0.666925	10.1372	2.8389	2.8578			2.8308	3.1173	100	100			100
823624	A-kinase anchor protein121; AKAP121 [Rattus norvegicus]	R.S*ESSGNLPSIVDTR.L	S101	2.81509	5.1203	3309579	O88884		396436	1433_m1 (S101) 0.32% PKA_Kin (S101) 0.54%	4.25265e+06	1.24519e+06	3.253e+06	5.72338e+06	1.9152e+06	3.37555e+06	3.41527	0.568371	0.567374	771.353		771.35	771.349	771.355	771.348	25.5541	2		2	2	2	2	9.30791		5.63666	3.68427	11.6819	2.81509	3.8331		3.8711	4.9734	4.0881	5.1203	25.5541		15.5751	25.5541	12.2185
822841	A-kinase anchor protein121; AKAP121 [Rattus norvegicus]	R.SES*SGNLPSIVDTR.L	S103	2.81509	5.3058	3309579	O88884		396436	Akt_Kin (S103) 0.14% Clk2_Kin (S103) 0.5%	4.25265e+06	1.24519e+06	3.253e+06	5.72338e+06	1.9152e+06	3.33593e+06	3.41527	0.568371	0.574112	771.35	771.353	771.348	771.35	771.352	771.357	15.1851	2	2	2	2	2	2	5.81828	9.14576	2.81509	5.26694	8.27659	14.3737	4.2911	5.3058	4.0133	4.2215	3.9255	4.806	13.8039	13.8039	15.1851	6.46264	3.85606
823392	A-kinase anchor protein121; AKAP121 [Rattus norvegicus]	R.TGATAS*PSAGAPPPK.T	S375	6.62037	3.7695	3309579	O88884		396436		1.59747e+06	857953	2.10121e+06	6.17424e+06	2.73866e+07	267624	1.86196	0.340319	102.333	695.33	695.329				695.334	26.0224	2	2				2	7.76454	6.62037				13.5645	3.5173	3.7695				3.7499	17.7936	11.3033
822889	AKT1 substrate 1 (proline-rich) (predicted), isoform CRA_b [Rattus norvegicus] [MASS=26348]	K.S*LPVSVPVWAFK.E	S171	2.05714	3.8326	149056020			406801		26139.5	134441	2.6129e+06	1.0143e+07	1.48213e+07	1.60415e+07	0.194431	0.257608	0.923933				705.367	705.374	705.374	64.472				2	2	2				2.39763	13.1372	12.0093				3.8326	3.4805	3.7552				64.472	64.4284
827831	AKT1 substrate 1 (proline-rich) (predicted), isoform CRA_b [Rattus norvegicus] [MASS=26348]	R.TEARS*S*DEENGPPS*SPDLDR.I	S190S191S199*	2.29693	4.6667	149056020	Q96B36	12441	406801	Casn_Kin2 (S67) 0.31%	1.64239e+06	1.48272e+06	4.31321e+06	2.62612e+06	44981	364598	1.10769	1.64243	0.123372			800.289				15.1892			3						2.29693						4.6667						15.1892
827897	AKT1 substrate 1 (proline-rich) (predicted), isoform CRA_b [Rattus norvegicus] [MASS=26348]	K.RTEARS*S*DEENGPPS*SPDLDR.I	S190S191S199*	4.53236	6.0778	149056020	Q96B36	12441	406801	Casn_Kin2 (S67) 0.31%	458143	275182	3.20228e+06	1.43151e+06	1.32484e+06	11985.4	1.66487	2.23699	110.538			852.325				45.2945			3						4.64978						6.0778						45.2945
826906	AKT1 substrate 1 (proline-rich) (predicted), isoform CRA_b [Rattus norvegicus] [MASS=26348]	R.S*SDEENGPPS*SPDLDR.I	S190S199*	4.46913	4.2527	149056020	Q96B36	12441	406801	Casn_Kin2 (S67) 0.31%	2.86739e+06	32356.8	2.96356e+06	335345	11184.5	ND	88.6178	8.83736	11184.5	931.334						36.6193	2						4.46913						4.2527						36.6193
827900	AKT1 substrate 1 (proline-rich) (predicted), isoform CRA_b [Rattus norvegicus] [MASS=26348]	R.TEARS*SDEENGPPS*SPDLDR.I	S190S199*	1.73359	4.2682	149056020	Q96B36	12441	406801	Casn_Kin2 (S67) 0.31%	40741.8	152915	3.03817e+06	145210	5.49675e+06	26367.5	0.266435	20.9226	208.467			773.633				8.89678			3						1.88453						4.2682						8.89678
826817	AKT1 substrate 1 (proline-rich) (predicted), isoform CRA_b [Rattus norvegicus] [MASS=26348]	R.S*SDEENGPPSS*PDLDR.I	S190S200*	1.82097	4.1587	149056020	Q96B36	12441	406801	Casn_Kin2 (S67) 0.31% Cdc2_Kin (S77) 0.56%	2.56702e+06	32356.8	2.98836e+06	335345	11184.5	ND	79.335	8.91131	11184.5	931.337						30.8059	2						7.61683						4.1587						30.8059
826800	AKT1 substrate 1 (proline-rich) (predicted), isoform CRA_b [Rattus norvegicus] [MASS=26348]	R.SSDEENGPPS*SPDLDR.I	S199*	2.71652	4.2051	149056020	Q96B36	12441	406801		7.84993e+06	2.38697e+06	9.69744e+07	851973	8.43798e+07	1.07516e+06	3.28866	113.823	78.4812	891.352		891.35				117.317	2		2				5.57334		3.27778				4.2051		3.8361				117.317		111.533
823333	AKT1 substrate 1 (proline-rich) (predicted), isoform CRA_b [Rattus norvegicus] [MASS=26348]	R.LNT*SDFQK.L	T234*	3.83556	1.9835	149056020	Q96B36	12441	406801	Akt_Kin (T111) 0.86%	6.54303e+06	8.20057e+06	2.82045e+06	3.70251e+06	3.66341e+06	2.75871e+06	0.797874	0.761766	1.32794		1032.45	1032.44		1032.45		23.8995		1	1		1			10.8092	3.83556		8.32003			1.9169	1.7128		1.9835			23.8995	7.59668		22.4677
824631	AKT1 substrate 1 (proline-rich) (predicted), isoform CRA_b [Rattus norvegicus] [MASS=26348]	R.LNT*SDFQK.L	T234*	1.51098	3.9511	149056020	Q96B36	12441	406801	Akt_Kin (T111) 0.86%	3.0981e+07	2.62209e+07	9.12519e+06	6.28328e+06	3.68545e+06	1.11211e+07	1.18154	1.4523	0.331394	516.725	516.726	516.725	516.725		516.73	33.8039	2	2	2	2		2	2.57641	4.23267	2.34396	2.10181		11.6809	3.2257	3.9511	3.5601	3.1552		3.2529	27.6042	33.8039	33.8039	33.8039
822613	alcohol sulfotransferase [Rattus rattus]	R.DVLVS*GYYFWGK.T	S128	4.68394	4.1207	311662	P22789		412991		881526	55354.8	1.28914e+06	1.26371e+06	322886	22821.7	15.925	1.02013	14.1482		757.347			757.355		39.2689		2			2			6.77815			17.989			4.1207			3.161			39.2689			29.8287
822187	alcohol sulfotransferase [Rattus rattus]	K.ENNMS*NYNLMEK.E	S228	4.94701	3.0636	311662	P22789		412991		7604.02	ND	1113.47	ND	1.17625e+06	22966.6	7604.02	1113.47	51.2158					783.806		11.3033					2						4.94701						3.0636						11.3033
825002	aldehyde dehydrogenase preprotein [Rattus norvegicus]	R.VVGNPFDS*RTEQGPQVDETQFK.K	S356	1.12972	5.1407	55605	P20000		395898		747942	169198	43808.6	52825.4	123545	37628.4	4.42052	0.829309	3.2833	853.392	853.394	853.394				64.2287	3	3	3				1.60662	4.78076	3.95205				5.1407	4.9006	4.0839				32.7581	20.8807	64.2287
826286	aldehyde dehydrogenase preprotein [Rattus norvegicus]	R.VVGNPFDSRT*EQGPQVDETQFK.K	T358	1.48935	4.9036	55605	P20000		395898		747942	358202	90107.8	47211.9	101580	23441.5	2.08805	1.90858	4.33334	853.391	853.396					7.87106	3	3					1.48935	6.86036					4.9036	3.8402					7.87106	7.87106
825685	aldolase A [Rattus norvegicus]	K.GILAADES*TGSIAK.R	S36*	3.63142	4.9267	1619605	P04075	70	408548		672007	1.73201e+06	1.38092e+06	5.45397e+06	1.55997e+06	148258	0.387993	0.253195	10.5221	706.84		706.84	706.84			20.096	2		2	2			3.63142		3.63142	4.33929			4.0889		4.9267	3.6836			12.0862		13.8917	20.096
825683	aldolase A [Rattus norvegicus]	K.GILAADESTGS*IAK.R	S39*	0.035394	4.1325	1619605	P04075	70	408548	Casn_Kin1 (S39) 0.14%	658301	1.75528e+06	496852	1.45718e+06	1.56799e+06	210310	0.375041	0.340967	7.45562	706.837		706.839	706.839			44.9354	2		2	2			0.035394		3.14298	2.45634			3.987		4.1325	3.99			9.12045		24.1234	44.9354
825667	aldolase A [Rattus norvegicus]	R.LQS*IGTENTEENR.R	S46*	1.25424	4.3156	1619605	P04075	70	408548	Cam_Kin2 (S46) 0.15% Akt_Kin (S46) 0.17%	3.34365e+06	1.2102e+07	801943	2.09384e+06	539172	246031	0.276288	0.383001	2.19148	785.843	785.848		785.845			56.1562	2	2		2			2.41934	8.79232		5.52626			3.7192	4.3156		3.973			48.6251	48.6251		56.1562
823034	aldolase B [Rattus norvegicus]	R.FPALTS*EQKK.E	S10	3.58131	3.1471	1619606	P00884		398767		6157.68	ND	8538.83	ND	3.92503e+06	1.62794e+06	6157.68	8538.83	2.41103					614.805	614.807	23.8995					2	2					3.58131	6.86144					3.1471	2.7006					23.8995
824423	aldolase B [Rattus norvegicus]	K.ETTIQGLDGLS*ER.C	S132	0.226867	3.0258	1619606	P05062	1972	398767		285052	702394	1.53608e+06	3.31062e+06	1.37935e+06	657311	0.40583	0.463985	2.09848			749.847		749.843		70.2708			2		2				5.6783		0.226867				3.0258		2.3981				61.2045		70.2708
822969	aldolase B [Rattus norvegicus]	R.IS*DQCPSSLAIQENANALAR.Y	S155	1.30025	5.664	1619606	P00884		398767		4.12169e+06	3.21175e+06	2.97924e+06	7.59172e+06	2.43241e+06	5.28408e+06	1.28331	0.392433	0.460327		1119.52	1119.52	1119.52	1119.53	1119.51	53.5914		2	2	2	2	2		5.66569	3.2618	5.55398	11.6619	1.42537		5.2274	5.6342	5.664	5.3935	5.4396		30.592	43.3795	49.4945	53.5914
823926	aldolase B [Rattus norvegicus]	R.IS*DQCPSSLAIQENANALAR.Y	S155	3.15009	7.081	1619606	P00884		398767		233697	641252	3.16227e+06	9.45766e+06	919724	1.26308e+06	0.364438	0.334361	0.72816		746.685	746.682	746.681		746.693	49.822		3	3	3		3		7.56466	4.21352	3.15009		19.3471		5.1804	6.0742	7.081		5.0981		27.9804	49.822	31.0879
824425	aldolase B [Rattus norvegicus]	R.AVLRIS*DQCPSSLAIQENANALAR.Y	S155	2.33816	6.4808	1619606	P00884		398767		4793.45	11027.9	734889	989812	503961	46662	0.434668	0.742454	10.8003			893.114	893.115	893.117		38.2522			3	3	3				5.64369	6.19274	8.38147				5.9265	6.0259	6.4808				6.9897	20.3007	38.2522
825694	aldolase B [Rattus norvegicus]	R.ISDQCPS*SLAIQENANALAR.Y	S160	4.29395	4.677	1619606	P00884		398767		98974.6	352704	2.1066e+06	7.11685e+06	1.31192e+06	369368	0.280616	0.296002	3.55181				746.684			8.98472				3						7.07763						4.677						8.98472
823978	aldolase B [Rattus norvegicus]	R.ISDQCPSS*LAIQENANALAR.Y	S161	3.04732	6.1217	1619606	P00884		398767		2.06524e+06	1.90478e+06	2.81376e+06	7.07885e+06	3.74257e+06	1.9428e+06	1.08424	0.397489	1.92638			1119.52	1119.52		1119.53	27.6042			2	2		2			3.2618	7.73445		17.0103			5.9373	6.1217		5.1776			16.9461	27.6042
822832	aldolase B [Rattus norvegicus]	K.GILAADES*VGTMGNR.L	S36	0.0381997	6.2645	1619606	P07341	1972	398767		7.67391e+06	6.51228e+06	4.88455e+06	3.45486e+07	3.17032e+08	6.42197e+07	1.17837	0.141382	4.93668	785.856		785.855	785.853	785.85	785.851	71.6986	2		2	2	2	2	6.93956		5.79359	4.15738	0.0381997	1.51525	5.7755		5.9281	5.6017	6.0698	6.2645	36.0382		56.1562	67.4031	67.4031
822965	aldolase B [Rattus norvegicus]	K.GILAADES*VGTMGNR.L	S36	6.38568	2.6668	1619606	P07341	1972	398767		132624	27460.5	16898.8	141942	4.00067e+06	1.58189e+06	4.82964	0.119055	2.52904					1570.71		32.2792					1						13.4525						2.6668						32.2792
822184	aldolase B [Rattus norvegicus]	K.GILAADESVGT*MGNR.L	T39	2.36838	5.9304	1619606	P07341	1972	398767		7.67391e+06	6.55235e+06	2.69845e+06	1.72522e+07	2.4275e+08	5.13348e+07	1.17117	0.156412	4.72877	785.855	785.854	785.854	785.855	785.853	785.864	82.8127	2	2	2	2	2	2	5.55802	5.0296	5.09327	6.30291	3.15147	17.6034	5.6712	4.0286	5.5804	4.9911	5.9304	5.7726	43.4475	60.2879	67.701	48.3877	76.7252
824421	aldolase B [Rattus norvegicus]	K.GILAADESVGT*MGNR.L	T39	11.2242	4.1971	1619606	P07341	1972	398767		228583	109896	3125.85	347742	288118	43888.8	2.08	0.00898899	6.56474					524.242		12.9427					3						11.2242						4.1971						12.9427
825838	aldolase B [Rattus norvegicus]	R.FPALT*SEQKK.E	T9	0.903469	3.0401	1619606	P00884		398767		1.27101e+07	1.12127e+07	2.31014e+06	5.02967e+06	10587.7	19472.1	1.13355	0.459301	0.543735	614.804			614.803				2			2			2.2953			0.903469			3.0401			2.7344
828130	alpha adducin [Rattus norvegicus]	R.GDDASEEGQNGSS*PK.S	S40*	5.51497	3.5907	633620	Q9QYC0		402640	Cdk5_Kin (S40) 0.23% Cdc2_Kin (S40) 0.49%	45.8	ND	15072.5	3337.28	786.133	274.2	45.8	4.51639	2.86701			779.293				13.6173			2						5.51497						3.5907						13.6173
821792	alpha adducin [Rattus norvegicus]	K.SPPDQSAVPNT*PPSTPVK.L	T185*	0.205383	5.1299	633620	Q9QYC0		402640	Erk1_Kin (T185) 0.38%	7.94453e+06	1.62381e+07	3.45001e+06	972218	3.1804e+06	2.62363e+06	0.489251	3.5486	1.21221	949.956	949.954	949.951	949.953	949.95	949.961	76.7252	2	2	2	2	2	2	7.92036	5.99294	2.32767	4.38149	2.13282	13.7026	4.9923	5.1031	4.9018	4.4603	5.1299	4.5883	76.7252	67.4031	42.4584	56.1562	31.741
821923	alpha adducin [Rattus norvegicus]	K.SPPDQSAVPNT*PPST*PVKLEGGLPQEPTSR.D	T185T189*	0.147988	5.53	633620	Q63028		402640	Cdc2_Kin (T189) 0.25% Erk1_Kin (T185) 0.38% Cdk5_Kin (T189) 0.42%	1.70083e+06	2.3475e+06	2.60484e+06	2.10774e+06	1.14593e+06	1.4298e+06	0.724525	1.23585	0.801463		1081.84	1081.84	1081.85	1081.85		23.1073		3	3	3	3			4.59379	3.99567	7.75392	11.4782			5.2222	4.7704	5.53	4.1727			15.9793	18.9911	23.1073	18.2001
827261	alpha adducin [Rattus norvegicus]	K.SPPDQSAVPNTPPST*PVK.L	T189*	16.2145	3.5088	633620	Q9QYC0		402640	Cdc2_Kin (T189) 0.25% Cdk5_Kin (T189) 0.42%	4.1845e+06	1.09429e+07	2.13626e+06	1.11738e+06	3.17684e+06	380517	0.382394	1.91185	8.34875		949.964					9.65582		2						16.2145						3.5088						9.65582
821941	alpha(10-inhibitor 3, precursor [Rattus norvegicus]	R.DT*EELTYSVPYGR.E	T651	0.596392	4.2831	55562			398552		2.64557e+06	1.61205e+06	2.12156e+06	1.9023e+06	1.79761e+06	3.85054e+06	1.64112	1.11526	0.466847	805.352	805.349	805.348	805.344	805.343	805.349	79.1965	2	2	2	2	2	2	11.8221	8.0326	6.89574	1.96312	0.596392	7.34924	4.2831	3.8452	3.717	3.6108	3.2031	2.8502	76.3681	79.1965	68.5184	69.9212	33.1676
822718	alpha-2-globin chain [Rattus norvegicus]	K.TYFSHIDVS*PGSAQVK.A	S50	0.627812	3.5536	3367720	P01946		413379		9.88116e+06	1.0511e+07	3.02043e+06	8.06335e+06	1.98622e+06	8.45652e+06	0.940082	0.374588	0.234874	605.951	605.951	605.951	605.95	605.958	605.957	42.0419	3	3	3	3	3	3	4.21293	3.71178	3.71178	1.69068	15.6069	13.9934	3.1767	2.7563	3.1891	3.2949	3.5536	3.0192	21.7173	21.9965	24.2041	42.0419	28.2624
822719	alpha-2-globin chain [Rattus norvegicus]	K.TYFSHIDVS*PGSAQVK.A	S50	0.0495641	5.5905	3367720	P01946		413379		1.43608e+07	1.49296e+07	2.08769e+06	8828561	3.77495e+06	3.05925e+07	0.9619	0.23647	0.123395	908.425	908.419	908.422	908.425	908.426	908.435	67.701	2	2	2	2	2	2	6.27257	0.154199	2.57733	5.88708	7.41253	17.7657	4.5711	4.995	5.0259	5.2242	5.5905	4.6429	63.6419	56.1562	61.229	67.701	56.1562
827583	alpha-2-globin chain [Rattus norvegicus]	K.TY*FSHIDVSPGSAQVK.A	Y43	6.54242	2.6526	3367720	P01946		413379		92439.7	ND	1566.62	83704.5	21535.1	859.633	92439.7	0.0187161	25.0515	908.425						-0.457575	2						6.54242						2.6526
823452	alpha-adducin, normotensive phenotype [Rattus norvegicus]	R.S*PGTPAGEGSGSPPK.W	S355*	7.66215	3.3554	785039	Q9QYC0		402640		711799	993074	39494.2	114343	1.73911e+07	864969	0.716763	0.345402	20.106						703.309	33.6118						2						7.66215						3.3554
823387	alpha-adducin, normotensive phenotype [Rattus norvegicus]	R.SPGT*PAGEGSGSPPK.W	T358*	4.61723	4.5842	785039	Q9QYC0		402640	p38_Kin (T358) 0.24% Cdc2_Kin (T358) 0.78%	890465	1.3218e+06	57601.7	294622	1.73981e+07	861688	0.673674	0.19551	20.1908	703.307	703.307				703.315	42.2564	2	2				2	5.0512	4.96583				15.9075	3.9543	4.4956				4.5842	23.7138	15.8493
822028	alpha-alpha enolase (NNE) [Rattus norvegicus]	R.AAVPSGAS*TGIYEALELR.D	S40*	9.22051	4.5883	56107	Q9LEJ0	573	397382		1.19932e+06	844528	1.51068e+06	816364	1.01055e+06	1.06753e+06	1.42011	1.8505	0.946627					942.967		22.4677					2						9.22051						4.5883						22.4677
826717	alpha-alpha enolase (NNE) [Rattus norvegicus]	R.IEEELGS*K.A	S419	1.35104	2.6753	56107	Q9PVK2	1400	405264		3.51953e+06	1.46714e+06	133472	599546	158497	335950	2.3989	0.222622	0.471786		492.719					100		2						2.65128						2.6753						100
824278	alpha-alpha enolase (NNE) [Rattus norvegicus]	K.TIAPALVS*K.K	S79	3.14438	2.3085	56107	Q9XSJ4	1400	405264		20814.7	91358.2	730341	2.66617e+06	1.57942e+06	335416	0.227835	0.273928	4.70883				979.525	979.531		47.0685				1	1					3.14438	8.82055					1.9488	2.3085					47.0685	34.9504
826696	alpha-alpha enolase (NNE) [Rattus norvegicus]	K.TIAPALVS*K.K	S79	2.81769	2.5872	56107	Q9XSJ4	1400	405264		137911	1.89022e+06	ND	109303	968489	1.20146e+06	0.0729602	9.14884e-06	0.806094		490.266					86.322		2						3.37919						2.5872						86.322
822720	alphaII spectrin [Rattus norvegicus]	R.WRS*LQQLAEER.S	S1217	0.280804	4.1727	1495198	P07751	1684	412436		3.4979e+06	4.23348e+06	234598	777650	2.43736e+06	3.4789e+06	0.826248	0.301676	0.700613	748.359	748.357		748.361	748.366	748.371	100	2	2		2	2	2	3.46324	0.929327		6.15759	13.4985	19.9501	4.1233	4.1727		3.6329	3.744	4.0737	100	100		100	100
822952	alphaII spectrin [Rattus norvegicus]	R.S*LQQLAEER.S	S1217	0.901584	3.6788	1495198	P07751	1684	412436		1.43374e+07	2.09976e+07	2.61322e+06	1.4464e+07	4.59623e+06	4.10281e+06	0.68281	0.180671	1.12026	577.267	577.267		577.268	577.27	577.27	100	2	2		2	2	2	0.901584	1.95921		2.80011	6.92655	7.45535	3.4504	3.4285		3.435	3.5096	3.6788	100	100		100	100
827581	alphaII spectrin [Rattus norvegicus]	R.WRS*LQQLAEER.S	S1217	1.71825	4.196	1495198	P07751	1684	412436		1.52433e+06	2.09761e+06	106151	217976	5485.3	42276.2	0.726701	0.486984	0.129749	499.241						100	3						2.20631						4.196						100
825733	alphaII spectrin [Rattus norvegicus]	K.LGES*QTLQQFSR.D	S1550	4.41751	3.5531	1495198	P07751	1684	412436		2.9042e+06	1.37982e+06	463187	921238	1.71097e+06	814061	2.10476	0.502788	2.10177		737.35		737.35			40.192		2		2				13.2796		13.0285				2.7273		3.5531				40.192		25.8003
827075	alternative stop codon [Rattus norvegicus]	K.AADGY*VKPQIK.Q	Y699*	4.67065	3.7994	1143542	P42232		406281		688809	6.14021e+06	76822.1	178829	752391	440199	0.11218	0.429584	1.70921		635.319					100		2						4.76517						3.7994						100
826752	Amida [Rattus norvegicus]	R.TTATLDPS*SPAPGEGPSGR.K	S170	2.40172	3.4953	6970379			402976		612367	1.43157e+06	1.36384e+06	2.03907e+06	663726	2.33607e+07	0.427758	0.668852	0.0284121	939.423	939.42					49.1569	2	2					5.78857	2.40703					3.4953	3.1197					12.0862	49.1569
822778	Amida [Rattus norvegicus]	R.TTATLDPSS*PAPGEGPSGR.K	S171	1.3047	4.3865	6970379			402976	p38_Kin (S171) 0.65%	276055	1.43157e+06	1.36384e+06	1.33778e+06	663726	969983	0.192833	1.01947	0.684266	939.415	939.424		939.419	939.435	939.413	22.4677	2	2		2	2	2	2.9875	7.02402		1.3047	18.9843	4.28689	3.9471	3.8414		3.757	4.3865	3.6788	9.77724	19.0849		9.77724	21.214
822629	Amida [Rattus norvegicus]	K.LLPYPTLAS*PPFD.-	S246	2.68745	3.6225	6970379			402976		315956	539727	547025	1.17868e+06	2.13031e+06	1.94841e+06	0.5854	0.4641	1.09336		755.871	755.868		755.87	755.877	90.579		2	2		2	2		7.20842	4.30256		6.07652	16.2569		3.6225	3.4391		3.4645	3.599		61.229	90.579		71.6986
822968	AMME chromosomal region gene 1-like [Rattus norvegicus]	R.ENVSDLTLGPGNS*PITR.M	S148	1.47037	5.5934	157817650	Q6DCA0	14625	404298	Cdc2_Kin (S74) 0.5%	512915	1.8645e+06	2.03293e+06	4.28412e+06	983249	966088	0.275095	0.474528	1.01776	925.45	925.448	925.443	925.442	925.44	925.44	67.701	2	2	2	2	2	2	13.0224	11.0385	4.77329	4.50841	2.00014	1.47037	5.3877	5.5881	4.6771	5.5934	5.181	4.0844	45.2534	67.701	61.229	55.8469	33.1745
827026	AMP-activated protein kinase [Rattus norvegicus]	R.TS*CGSPNYAAPEVISGR.L	S173*	4.84345	4.4916	488376	Q13131	2735	399460		1.09101e+06	814703	649136	94361.7	705065	6.37971e+06	1.33915	6.87923	0.110517	923.404		923.4				13.8021	2		2				9.00964		4.84345				4.1851		4.4916						13.8021
821904	AMP-activated protein kinase [Rattus norvegicus]	R.MPPLIADS*PK.A	S377	1.84581	3.9952	488376	P54646	2735	399460		25120756	1.11798e+06	5.35354e+06	55726.8	7.19478e+06	65866	22.4699	96.0677	109.234	574.778		574.776		574.776		100	2		2		2		5.56354		2.58588		1.95029		3.6831		2.8129		3.9952		100		100		100
822186	AMP-activated protein kinase [Rattus norvegicus]	R.MPPLIADS*PK.A	S377	3.60456	2.8005	488376	P54646	2735	399460		20851.8	11590.4	4460.82	ND	1.4631e+08	31549.9	1.79905	4460.82	4637.4					1148.56		100					1						12.433						2.8005						100
821888	AMP-activated protein kinase [Rattus norvegicus]	R.T*SCGSPNYAAPEVISGR.L	T172*	0.31423	5.2488	488376	Q13131	2735	399460		3.17494e+06	814703	649136	1.47971e+06	674059	6.37147e+06	3.89704	0.438693	0.105793	923.404	923.407	923.4	923.401	923.398	923.408	32.2792	2	2	2	2	2	2	8.80919	12.9103	5.0439	5.97033	3.0556	13.1758	4.9182	4.1121	4.5089	4.1679	3.429	5.2488	25.1609	32.2792	28.396	32.2792	18.576
822360	AMP-activated protein kinase beta [Rattus norvegicus]	R.S*QNNFVAILDLPEGEHQYK.F	S108*	0.0438203	6.0307	1185269	Q9R078		395759		98438.6	125218	9.86313e+06	8.73096e+06	5.50644e+06	3.49665e+06	0.78614	1.12967	1.57477		1141.54	1141.53	1141.53	1141.55	1141.54	141.605		2	2	2	2	2		8.01466	3.30404	3.41359	15.0739	12.2914		4.3663	5.575	5.0779	6.0307	5.5098		105.566	132.231	128.339	141.605
824909	AMP-activated protein kinase beta [Rattus norvegicus]	R.S*QNNFVAILDLPEGEHQYK.F	S108*	3.11123	2.5165	1185269	Q9R078		395759		41282	227650	189378	784081	54169.5	5.5498e+06	0.18134	0.241528	0.00976062				761.357			75.5873				3						3.11123						2.5165						75.5873
822530	AMP-activated protein kinase beta [Rattus norvegicus]	K.CSDVSELSS*SPPGPYHQEPYISKPEER.F	S181*	0.427843	6.2382	1185269	P80386		395759		2.22403e+07	2.29296e+07	7619165	1599417	5.45499e+06	24510532	0.969938	4.76371	0.222557	1052.46	1052.47	1052.46	1052.46	1052.47		38.3626	3	3	3	3	3		3.37519	10.7023	1.06168	3.05827	12.908		4.5899	5.5841	4.2752	6.2382	5.5446		22.833	38.3626	29.0327	29.0327	25.4218
822306	AMP-activated protein kinase beta [Rattus norvegicus]	K.CSDVSELSSS*PPGPYHQEPYISKPEER.F	S182*	2.42444	5.4245	1185269	P80386		395759		3.39251e+06	7.37292e+06	7.11194e+06	6.57188e+06	8.62046e+06	2.33887e+06	0.460131	1.08218	3.68574	1052.47			1052.47	1052.47		16.4427	3			3	3		8.12894			5.2767	8.84517		3.7899			5.4245	4.5691		7.17855			16.4427	4.77121
824440	amphiphysin [Rattus norvegicus]	K.S*PSPPPDGSPAATPEIR.V	S296*	0.039868	4.0693	2145469	O08539		402415	Erk1_Kin (S296) 0.12%	5.26755e+07	1.72438e+07	1.43713e+07	4.447e+06	2.17732e+06	1.46262e+07	3.05475	3.23169	0.148864		878.407	878.403	878.404	878.402		15.2724		2	2	2	2			6.88003	2.39207	3.08691	1.00239			3.4533	4.0693	3.6886	3.0008			8.46185	8.23909	15.2724	6.77781
825260	amphiphysin [Rattus norvegicus]	K.S*PSPPPDGS*PAATPEIR.V	S296S304*	0.615548	4.3014	2145469	O08539		402415	Erk1_Kin (S296) 0.12% GSK3_Kin (S304) 0.82%	7.11017e+06	1.03727e+07	1.41042e+06	2.69835e+06	4.38024e+06	5.83995e+06	0.685468	0.522697	0.750049	918.392	918.388	918.385	918.386			35.3109	2	2	2	2			8.19272	4.06914	1.0132	1.49801			4.3014	3.8958	3.2199	3.1223			27.3474	19.2781	35.3109	25.9956
823108	amphiphysin [Rattus norvegicus]	K.SPS*PPPDGSPAATPEIR.V	S298*	0.0284771	4.7099	2145469	O08539		402415	GSK3_Kin (S298) 0.24% Erk1_Kin (S298) 0.71%	5.2733e+07	3.9108e+07	2.34404e+07	4.447e+06	9.45033e+06	2.02954e+06	1.3484	5.27105	4.6564	878.406	878.407	878.404	878.403	878.417	878.41	20.012	2	2	2	2	2	2	5.17142	6.88003	2.80784	2.52876	18.5212	10.32	4.7099	4.3948	4.5571	4.6164	4.4727	4.5266	10.6145	20.012	11.9539	16.9024	13.8039
823135	amphiphysin [Rattus norvegicus]	K.SPS*PPPDGS*PAATPEIR.V	S298S304*	1.49801	5.0084	2145469	O08539		402415	GSK3_Kin (S298) 0.24% Erk1_Kin (S298) 0.71% GSK3_Kin (S304) 0.82%	7.11125e+06	1.03079e+07	1.12422e+07	3.06491e+06	4.45469e+06	3.46264e+06	0.689886	3.66803	1.2865	918.39	918.391	918.388	918.387	918.397	918.392	25.0088	2	2	2	2	2	2	6.32976	7.13051	3.67149	2.47308	13.5146	8.59582	5.0084	4.0378	3.9683	3.6666	2.8669	4.1567	25.0088	19.1149	20.9991	24.4041	14.9823
822157	amphiphysin [Rattus norvegicus]	K.SPSPPPDGS*PAATPEIR.V	S304*	0.0968222	5.2982	2145469	O08539		402415	GSK3_Kin (S304) 0.82%	1.01906e+08	9.20846e+07	7.08689e+07	3.89338e+07	2.21892e+07	5.09975e+07	1.10666	1.82024	0.435103	878.407	878.409	878.403	878.402	878.409	878.417	57.7661	2	2	2	2	2	2	7.05089	9.06704	2.32373	1.00239	8.50889	18.3845	5	5.2982	5.189	5.2157	5.2193	5.2949	36.2248	52.8794	57.7661	42.783	25.4411
824763	amphiphysin [Rattus norvegicus]	K.SPSPPPDGS*PAAT*PEIR.V	S304T308*	0.680916	4.0935	2145469	O08539		402415	GSK3_Kin (S304) 0.82%	1.10168e+06	3.56161e+06	1.97483e+06	456976	6.32303e+06	839035	0.30932	4.32152	7.53608	918.395	918.385				918.4	40.6065	2	2				2	11.9186	0.680916				17.5673	4.0935	3.2256				3.4335	18.5295	33.2846
827040	amphiphysin [Rattus norvegicus]	R.VNHEPEPASGAS*PGATIPK.S	S324	5.20912	5.1869	2145469	O08539		402415		ND	2.88635e+06	ND	ND	2.38279e+06	ND	3.46458e-07	1	2.38279e+06		646.973					18.5494		3						5.20912						5.1869						18.5494
827445	amyotrophic lateral sclerosis 2 (juvenile) chromosome region, candidate 13 isoform a [Mus musculus]	R.TS*PTVATQTGASVTSTR.G	S102	3.30121	3.4361	83582792					755585	707076	618728	1.33538e+06	120993	115099	1.0686	0.463336	1.05121	872.912						-0.457575	2						3.30121						3.4361
827458	amyotrophic lateral sclerosis 2 (juvenile) chromosome region, candidate 13 isoform a [Mus musculus]	R.TSPT*VATQTGASVTSTR.G	T104	3.83994	2.9963	83582792					750376	707076	614677	1.32638e+06	149005	120837	1.06124	0.463426	1.23311	872.913	872.915					7.60422	2	2					3.83994	6.94053					2.9963	2.7285					7.60422
824323	anaphase promoting complex subunit 1 (predicted) [Rattus norvegicus] [MASS=216077]	R.SFDFEGSLS*PVIAPK.K	S688*	16.0711	3.2005	149023243	P53995			Erk1_Kin (S688) 0.23%	1.68339e+06	4.77893e+06	1.88316e+06	1.35775e+06	220462	35666.8	0.352252	1.38698	6.18115					837.408		19.8227					2						16.0711						3.2005						19.8227
826674	androgen-induced proliferation inhibitor [Rattus norvegicus] [MASS=17094]	R.METVSNASSSSNPS*SPGR.I	S56*	2.92303	3.8838	55977038	-	5624			63629.4	876723	299755	272822	214971	222080	0.0725764	1.09872	0.96799	937.886	937.891					36.0382	2	2					2.92303	8.77972					3.8838	2.8505					36.0382	26.1779
822906	androgen-induced proliferation inhibitor [Rattus norvegicus] [MASS=17094]	R.METVSNASSSSNPSS*PGR.I	S57*	0.138685	5.3099	55977038	-	5624		Cdc2_Kin (S1166) 0.16% Cdk5_Kin (S1166) 0.25%	2.51823e+06	2.63198e+06	222992	482442	209005	222080	0.956781	0.462214	0.941127	937.887	937.889		937.883	937.891		30.193	2	2		2	2		4.5499	6.17676		0.138685	8.19299		4.7569	5.3099		4.9224	4.6039		27.6042	30.193		25.5751	19.0849
823422	androgen-induced proliferation inhibitor [Rattus norvegicus] [MASS=6236]	R.AES*PETSAVESTQSTPQK.G	S34	0.643894	6.4332	58257368			411357		1.87091e+07	3.50923e+07	4.10044e+06	1.0033e+07	1.28832e+06	3.21656e+06	0.533139	0.408697	0.400528	978.931	978.93	978.927	978.93	978.935	978.945	76.816	2	2	2	2	2	2	5.887	4.3897	1.51775	5.07447	9.50501	19.8581	6.3423	6.019	5.1261	6.4332	5.1602	5.9881	76.816	56.1562	56.1562	61.229	28.396
825722	androgen-induced proliferation inhibitor [Rattus norvegicus] [MASS=6236]	R.AESPET*SAVESTQSTPQK.G	T37	3.72537	3.6808	58257368			411357		1.78495e+06	3.02002e+06	33536.8	2.3137e+06	420910	39437.4	0.59104	0.0144948	10.6729	652.955			652.955			6.45244	3			3			3.81736			3.72537			2.8863			3.6808			5.65093			6.45244
821998	androgen-inducible aldehyde reductase [Rattus norvegicus]	R.FFGNS*WSETYR.N	S234	0.875416	4.1502	6815049	Q8CG45		405236		6.39746e+06	1.90733e+06	3.23893e+06	2.29889e+06	3.03525e+07	648019	3.35415	1.40891	46.8389	737.301	737.302	737.299	737.299	737.297	737.302	35.3857	2	2	2	2	2	2	7.75654	8.66587	5.4357	5.02175	1.71011	9.16126	3.9341	4.0326	3.8116	4.1502	4.0815	3.739	29.8287	35.3857	25.8003	27.6809	26.0224
827314	androgen-inducible aldehyde reductase [Rattus norvegicus]	R.MDAS*ASAATVR.A	S33	5.5283	3.32	6815049	Q8CG45		405236		352081	1.42338e+06	21767.7	83670.6	77732.8	19673.1	0.247356	0.26016	3.95122	580.247						26.0224	2						5.5283						3.32						26.0224
824299	ankyrin 1, erythroid [Rattus norvegicus] [MASS=187123]	R.LGYIS*VTDVLK.V	S688	5.6847	3.5483	149057782	P16157	1693	410865		543098	ND	ND	26702	89215.5	11638.8	543098	3.74503e-05	7.66535					644.337		16.118					2						5.6847						3.5483						16.118
823406	ankyrin repeat domain protein 17 [Rattus norvegicus]	R.NS*PLDCGSASPNK.G	S1881*	1.61226	4.4872	157819499	-	10648	408627		3.89585e+06	6.11327e+06	1.60689e+06	1.09775e+06	3.29793e+06	1.0967e+07	0.637277	1.46381	0.300714	713.79	713.789	713.791	713.792		713.792	109.903	2	2	2	2		2	4.43721	2.81094	5.80411	6.31582		6.91866	3.9678	4.4872	3.9292	3.7369		4.274	109.903	109.903	106.247	102.437
822928	ankyrin repeat domain protein 17 [Rattus norvegicus]	R.APS*PAPSSVPLGSEKPSSVSQDR.K	S2156	0.330493	4.6656	157819499			408627	GSK3_Kin (S461) 0.29%	4.75559e+06	8.57882e+06	1.33308e+07	1.49882e+07	1.11847e+07	5.55633e+06	0.554341	0.889416	2.01296	787.379	787.376	787.38	787.38	787.386	787.389	68.194	3	3	3	3	3	3	4.36418	0.440657	4.67772	4.67772	13.0543	16.3125	3.9082	3.9558	4.6656	3.9823	4.1354	4.0418	64.0649	60.5348	64.18	68.194	38.4711
826777	ankyrin repeat domain protein 17 [Rattus norvegicus]	R.APSPAPS*SVPLGSEKPSSVSQDR.K	S2160	5.10142	3.6411	157819499			408627	GSK3_Kin (S465) 0.23%	4.75559e+06	8.44391e+06	ND	21788.9	3491.07	440725	0.563198	4.58949e-05	0.0079212		787.38					7.78151		3						5.10142						3.6411						7.78151
826778	ankyrin repeat domain protein 17 [Rattus norvegicus]	R.APSPAPSS*VPLGSEKPSSVSQDR.K	S2161	4.52095	3.7725	157819499			408627		4.75559e+06	8.44807e+06	ND	21788.9	3491.07	440725	0.56292	4.58949e-05	0.0079212		787.379					21.7169		3						4.52095						3.7725						21.7169
821874	annexin V-binding protein ABP-7 [Rattus norvegicus]	K.SVPTIDS*GNEDDDSSFK.I	S115	0.00528334	4.3458	1514949					1.34252e+08	1.41712e+08	3.46871e+07	1.80441e+08	7.31669e+07	144921968	0.947359	0.192235	0.504871	946.883	946.88	946.882	946.879	946.881	946.887	76.7283	2	2	2	2	2	2	8.51138	5.15651	7.47587	4.31647	5.54219	11.9296	3.6808	4.3458	3.4129	3.7646	3.9243	3.6832	67.701	67.4031	76.7283	71.6986	67.701
822266	annexin V-binding protein ABP-7 [Rattus norvegicus]	K.TSFDENDS*EELEDKDSK.S	S14	0.0677051	5.4411	1514949				Casn_Kin2 (S14) 0.12%	2.16173e+07	1.90496e+07	2.91735e+07	2.91275e+07	1.50431e+07	1.2545e+06	1.13479	1.00158	11.9913	1034.41	1034.41	1034.4	1034.4	1034.41	1034.41	109.084	2	2	2	2	2	2	9.95738	5.61949	0.285329	1.48467	13.6472	7.85856	4.8662	5.4411	5.2485	5.0801	5.4099	4.6707	73.3942	88.2421	75.3542	109.084	71.2524
822774	annexin V-binding protein ABP-7 [Rattus norvegicus]	K.TSFDENDS*EELEDKDSK.S	S14	0.198279	4.3917	1514949				Casn_Kin2 (S14) 0.12%	2.63958e+07	1.89886e+07	5.11936e+07	3.25591e+07	5.01107e+06	5.80268e+06	1.39009	1.57233	0.863578	689.939	689.939	689.936	689.936	689.942	689.941	64.7638	3	3	3	3	3	3	4.93277	5.63883	0.768936	1.21385	10.2475	8.29864	4.3917	4.1571	3.6	3.9965	3.9003	3.4424	60.6163	59.9599	56.5168	56.2882	64.7638
823069	annexin V-binding protein ABP-7 [Rattus norvegicus]	K.KTSFDENDS*EELEDKDSK.S	S14	1.03375	4.502	1514949				Casn_Kin2 (S14) 0.12%	2.26287e+06	2.65917e+06	6.40443e+06	5.58148e+06	1.85802e+06	3.93843e+06	0.850971	1.14744	0.471767	732.636		732.635	732.635	732.637		32.5319	3		3	3	3		3.53842		1.65309	1.95365	4.45376		3.192		4.502	3.4959	2.6907		28.4952		32.5319	22.7591	27.4144
827671	annexin V-binding protein ABP-7 [Rattus norvegicus]	K.KTSFDENDS*EELEDKDSK.S	S14	1.84891	4.5933	1514949				Casn_Kin2 (S14) 0.12%	173053	381658	1.43313e+06	73986.9	ND	ND	0.453425	19.37	1	1098.45						55.4348	2						1.84891						4.5933						55.4348
827692	annexin V-binding protein ABP-7 [Rattus norvegicus]	K.KPARPNS*EVLLSGSEDADDPNK.L	S32	3.58394	3.966	1514949					740626	438740	1.17841e+06	27696.3	ND	13539.4	1.68808	42.5473	7.38587e-05		1210.06					9.95635		2						3.58394						3.966						9.95635
822423	annexin V-binding protein ABP-7 [Rattus norvegicus]	K.KPARPNSEVLLS*GSEDADDPNK.L	S37	0.19842	5.2327	1514949					7.73966e+06	5.60979e+06	1.17808e+07	6.69559e+06	9.77426e+06	50792.2	1.37967	1.75949	192.436	807.047	807.046	807.044	807.046	807.047		33.9769	3	3	3	3	3		4.67524	4.26187	0.954894	4.26187	5.19196		5.199	4.9677	5.2327	4.9802	3.7887		29.3	26.4844	23.9245	33.9769	11.645
825303	annexin V-binding protein ABP-7 [Rattus norvegicus]	K.KPARPNSEVLLSGS*EDADDPNK.L	S39	0.285229	4.5246	1514949					7.73966e+06	5.60979e+06	1.17808e+07	3.34027e+06	470.7	ND	1.37967	3.52691	470.7	807.046			807.04			13.1326	3			3			4.28668			3.2822			4.5246			4.3152			13.1326			6.50909
827684	annexin V-binding protein ABP-7 [Rattus norvegicus]	K.KPARPNSEVLLSGS*EDADDPNK.L	S39	9.03629	4.2844	1514949					741575	438740	1.17841e+06	25196.2	ND	13539.4	1.69024	46.7693	7.38587e-05	1210.07						9.0759	2						9.03629						4.2844						9.0759
826547	annexin V-binding protein ABP-7 [Rattus norvegicus]	R.VNS*SGES*GGESDEFLQSR.K	S83S87	5.17419	4.6583	1514949				Akt_Kin (S83) 0.27%	253743	523496	12233.2	19767.5	34854.6	5632.9	0.484709	0.618857	6.18769		1022.89					26.734		2						5.17419						4.6583						26.734
826364	annexin V-binding protein ABP-7 [Rattus norvegicus]	R.VNS*SGESGGES*DEFLQSR.K	S83S91	6.78806	4.5306	1514949				Akt_Kin (S83) 0.27%	777142	1.0261e+06	27310.1	33421.9	117238	ND	0.757371	0.817132	117238	1022.89	1022.89					25.3684	2	2					11.3851	6.78806					4.4997	4.5306					17.7225	25.3684
822953	annexin V-binding protein ABP-7 [Rattus norvegicus]	R.VNSSGESGGES*DEFLQSR.K	S91	3.96988	4.5714	1514949					1.16056e+06	972372	2718.32	43084.4	495137	132620	1.19353	0.0630931	3.7335		982.902			982.907		42.2669		2			2			4.65188			9.86866			4.4442			4.5714			42.2669			36.4844
822878	antioxidant enzyme B166 [Rattus norvegicus]	K.GVLFGVPGAFT*PGCSK.T	T96	9.24847	3.3497	6103726	Q9GLW7	5958	407375		1.74724e+06	1.89044e+06	164551	306368	292238	89970.5	0.924246	0.537103	3.24816					837.399		1.02662					2						9.24847						3.3497						1.02662
827437	APC protein [Rattus norvegicus]	K.QSVGSGS*PVQTVGLENR.L	S2710	0.406722	3.6347	1580725	P70478		406899		466194	377830	39075.3	182449	163096	5633.67	1.23387	0.214172	28.9502	897.919						22.4115	2						4.55753						3.6347						22.4115
823932	APEX nuclease [Rattus norvegicus]	R.AAAEDGEEPKS*EPETKK.S	S18	2.08879	4.0789	624915	P43138		400508	Casn_Kin2 (S18) 0.65%	368029	381615	7.86052e+06	1.44984e+07	70298.4	54493.2	0.964399	0.542166	1.29004	632.621		632.616	632.616	632.619	632.626	43.3379	3		3	3	3	3	11.0716		3.24396	2.63209	8.17051	19.859	3.3558		4.0789	3.3482	2.9656	3.821	43.3379		31.7449	32.6634	11.2614
824044	APEX nuclease [Rattus norvegicus]	R.AAAEDGEEPKS*EPETK.K	S18	1.6688	2.9793	624915	P43138		400508	Casn_Kin2 (S18) 0.65%	5.09833e+06	606158	349076	5.06761e+06	18648.4	673499	8.41088	0.0688838	0.0276888				589.917		589.919	16.4584				3		3				1.6688		5.99635				2.9793		2.7915				16.4584
824045	APEX nuclease [Rattus norvegicus]	R.AAAEDGEEPKS*EPETK.K	S18	0.305476	4.1166	624915	P43138		400508	Casn_Kin2 (S18) 0.65%	2.07152e+06	295543	1.18907e+06	1.98512e+06	2.80895e+06	117095	7.00922	0.598994	23.9886	884.373	884.372	884.373	884.373	884.377	884.37	71.1999	2	2	2	2	2	2	3.96552	2.24015	4.17482	3.93158	7.83484	0.305476	4.1166	4.1096	3.6305	3.9228	3.5522	3.9384	71.1999	49.1569	48.0864	61.7261	52.0794
825024	APEX nuclease [Rattus norvegicus]	R.AAAEDGEEPKS*EPETKK.S	S18	1.0022	3.7161	624915	P43138		400508	Casn_Kin2 (S18) 0.65%	28212.9	26440.6	1.18197e+06	2.5436e+06	1382.57	62.9	1.06703	0.464685	21.9804		948.425	948.421	948.418			59.1569		2	2	2				8.21271	3.83472	1.0022				2.9651	3.618	3.7161				31.9863	42.2792	59.1569
823960	APEX nuclease [Rattus norvegicus]	R.AAAEDGEEPKSEPET*K.K	T22	1.43687	2.7417	624915	P43138		400508		4.34216e+06	1.26459e+06	2.755e+06	207007	7.4185e+06	1.51996e+06	3.43365	13.3087	4.88071	589.916			589.916	589.918	589.919	25.5318	3			3	3	3	1.54435			1.43687	4.33887	5.37409	2.5381			2.5557	2.5362	2.7417	19.7445			8.19544	23.4002
823197	apolipoprotein E [Rattus norvegicus]	R.NEVNTMLGQS*TEELR.S	S139	0.949588	5.1522	295916	P02650		405681		7.11938e+06	321231	6.39479e+06	1.28828e+07	4.74343e+06	5.58422e+06	22.1628	0.49638	0.849435		900.899	900.898	900.897	900.899	900.904	16.9461		2	2	2	2	2		3.59287	2.91539	2.37674	3.65951	9.82896		4.8519	4.7444	5.0452	5.1522	3.988		12.0862	16.9461	16.9461	13.8917
827875	apolipoprotein E [Rattus norvegicus]	R.NEVNTMLGQST*EELR.S	T140	0.538655	4.3224	295916	P02650		405681		15530	321231	1.56549e+06	1.33169e+06	679178	1.75053e+06	0.0483453	1.17556	0.387984			900.898				20.096			2						2.84875						4.3224						20.096
822626	apoptotic chromatin condensation inducer 1 [Rattus norvegicus] [MASS=135287]	K.SSSFSEEKGES*DDEKPR.K	S216*	0.0852642	4.9263	149063915	Q9JIX8		403006	Casn_Kin2 (S216) 0.31%	8.92575e+06	9.61006e+06	9.34389e+06	1.13633e+07	2.51766e+06	1.47075e+07	0.928793	0.822284	0.171182	997.405	997.411	997.406	997.404	997.414	997.421	103.285	2	2	2	2	2	2	0.125389	6.38976	1.48961	1.1285	9.08307	16.1849	4.2927	4.9263	4.7404	4.1394	4.1511	4.1316	103.285	78.5798	89.8708	89.6679	69.0201
822682	apoptotic chromatin condensation inducer 1 [Rattus norvegicus] [MASS=135287]	K.SSSFSEEKGES*DDEKPR.K	S216*	0.0752331	3.9951	149063915	Q9JIX8		403006	Casn_Kin2 (S216) 0.31%	2.09473e+07	2.15784e+07	2.83375e+07	3.5742e+07	1.9314e+07	6.59283e+07	0.970755	0.792836	0.292954	665.274	665.272	665.273	665.273	665.277	665.282	65.4031	3	3	3	3	3	3	2.38238	0.0752331	0.476476	0.657036	6.99663	14.1587	3.9906	3.8836	3.9951	3.8186	3.2473	3.3322	65.4031	55.8992	46.3396	64.3385	55.8992
827773	apoptotic chromatin condensation inducer 1 [Rattus norvegicus] [MASS=135287]	K.S*QSPSLPPLPEDLEK.A	S385	3.24438	3.5877	149063915			403006		3.67634e+07	3.45513e+07	6.34461e+07	9.48863e+07	1.50196e+07	7.45466e+07	1.06402	0.668654	0.201479			858.913	858.911			11.2494			2	2					5.14324	3.24438					2.7864	3.5877					11.2494	8.23909
823227	apoptotic chromatin condensation inducer 1 [Rattus norvegicus] [MASS=135287]	K.SQS*PSLPPLPEDLEK.A	S387	1.68335	3.6654	149063915			403006		3.67725e+07	3.455e+07	6.34393e+07	9.49766e+07	1.13638e+07	7.45338e+07	1.06433	0.667947	0.152466	858.914	858.917	858.912	858.91	858.922	858.917	20.096	2	2	2	2	2	2	6.65766	9.79132	4.95102	2.32407	15.6917	10.6417	3.4511	3.256	3.6654	3.1579	2.792	3.1082	20.096	19.8691	16.7265	16.9024	16.9024
827000	apoptotic chromatin condensation inducer 1 [Rattus norvegicus] [MASS=135287]	K.APVVLQPEQIVS*EEETPPPLLTK.E	S411*	0.944366	4.7253	149063915	Q9JIX8		403006		1.88226e+06	1.27572e+06	1.31888e+06	259428	74157.3	1320486	1.47545	5.08379	0.0561591	1297.67						23.6248	2						0.944366						4.7253						23.6248
823133	apoptotic chromatin condensation inducer 1 [Rattus norvegicus] [MASS=135287]	R.GLS*PLSSTADTK.A	S479	0.708273	3.1749	149063915			403006		5.06247e+06	4.02072e+06	9.7924e+06	1.18342e+07	2.75174e+06	2.23845e+06	1.2591	0.827465	1.22931	1256.59	1256.6	1256.58	1256.58	1256.59		41.0781	1	1	1	1	1		8.96873	17.1256	2.9445	4.79077	11.3959		3.1749	2.8237	2.7784	3.1651	2.2841		31.5836	40.8094	31.5836	40.7059	41.0781
823352	apoptotic chromatin condensation inducer 1 [Rattus norvegicus] [MASS=135287]	R.GLS*PLSSTADTK.A	S479	0.358116	3.8064	149063915			403006		1.0103e+08	5.60591e+07	4.6119e+07	5.61153e+07	433631	4.44563e+07	1.8022	0.821861	0.00975411	628.794	628.795	628.794	628.794	628.802	628.798	76.7283	2	2	2	2	2	2	3.66073	5.11705	2.29989	2.2044	15.9956	9.97939	3.667	3.8064	3.7626	3.6219	2.5343	3.6908	68.0645	68.0645	68.0645	68.0645	55.8469
824144	apoptotic chromatin condensation inducer 1 [Rattus norvegicus] [MASS=135287]	R.GLS*PLSSTADTKAES*PAER.V	S479S491	0.0385192	5.8815	149063915			403006		5.23756e+06	4.93102e+06	6.25187e+06	7.57502e+06	6.35112e+06	3.12725e+06	1.06216	0.825326	2.0309	1038.96	1038.96	1038.95	1038.95	1038.96	1038.97	44.1204	2	2	2	2	2	2	8.97007	9.91377	2.9756	2.15225	7.09229	18.3781	4.9486	4.8238	5.1775	5.8815	5.3819	4.9357	35.6438	30.7699	34.0216	44.1204	29.1825
826574	apoptotic chromatin condensation inducer 1 [Rattus norvegicus] [MASS=135287]	R.GLS*PLSSTADTKAES*PAER.V	S479S491	0.592232	3.8214	149063915			403006		5.78907e+06	4.44994e+06	5.32436e+06	6.45951e+06	3.16605e+06	2.16672e+06	1.30093	0.824268	1.46122	692.974	692.972	692.97	692.969			37.313	3	3	3	3			8.61377	5.70562	2.6193	1.56002			3.4287	3.6775	3.5244	3.8214			37.313	29.5032	32.5236	36.3735
824229	apoptotic chromatin condensation inducer 1 [Rattus norvegicus] [MASS=135287]	R.GLS*PLSSTADT*KAESPAER.V	S479T487	0.592232	3.2998	149063915			403006		5.80225e+06	4.44994e+06	4.42666e+06	6.45951e+06	3.15704e+06	2.18399e+06	1.30389	0.685293	1.44554	692.973	692.972	692.968	692.97	692.977	692.98	33.4032	3	3	3	3	3	3	7.73266	5.70562	0.592232	3.54375	12.846	17.4296	2.9641	3.2998	2.8559	3.1627	2.8017	3.0038	25.3309	33.4032	26.1943	27.3035	22.8091
827713	apoptotic chromatin condensation inducer 1 [Rattus norvegicus] [MASS=135287]	R.GLSPLS*STADTKAES*PAER.V	S482S491	2.09929	5.5574	149063915			403006		5.23295e+06	4.9471e+06	6.25187e+06	7.59397e+06	6.39631e+06	2.25227e+06	1.05778	0.823267	2.83994				1038.95			26.3667				2						3.3319						5.5574						26.3667
825161	apoptotic chromatin condensation inducer 1 [Rattus norvegicus] [MASS=135287]	K.SLS*PGVSR.D	S658*	0.69129	2.1615	149063915	Q9UKV3	5191	403006		163207	67472.8	894935	1.40078e+06	44307.5	ND	2.41886	0.638885	44307.5				441.708			28.945				2						0.69129						2.1615						28.945
826999	apoptotic chromatin condensation inducer 1 [Rattus norvegicus] [MASS=135287]	K.APVVLQPEQIVSEEET*PPPLLTK.E	T415*	9.07353	4.8981	149063915	Q9JIX8		403006	Erk1_Kin (T417) 0.36%	4.0178e+06	1.5803e+06	1.4645e+06	1.03905e+06	136166	2.58032e+06	2.54242	1.40947	0.052771	865.458	865.462					51.5438	3	3					9.07353	13.6603					4.8981	3.5613					51.5438	30.1464
826123	A-raf protein (AA 1 - 604) [Rattus norvegicus]	R.SAS*EPSLHR.A	S580*	2.43545	2.2528	55757	P10398	1265	400794	1433_m1 (S621) 00%	4.24968e+06	4.72052e+06	ND	84117.8	ND	239815	0.900258	1.18881e-05	4.16987e-06	532.233	532.234					22.6557	2	2					2.43545	3.34756					2.0877	2.2528					22.6557	22.6557
825423	archvillin [Mus musculus]	R.YPS*GSEIPVVEDEEKVDER.A	S632	1.42668	4.4107	22036196	Q8K4L3				10067.9	560328	1313435	ND	ND	545797	0.0179678	1313435	1.83218e-06		753.009	753.003				29.7344		3	3					8.95875	1.42668					3.8459	4.4107					16.0806	29.7344
823494	arfaptin 1 [Rattus norvegicus]	K.HSLPS*GLGLSETQITSHGFDSTK.E	S39	0.375128	4.1046	9717247	Q9JHU5		400966		28393.9	136514	1.49975e+06	1912.6	112618	682033	0.207993	784.144	0.165121	827.062		827.058			827.057	26.9283	3		3			3	8.03898		3.76337			1.98858	3.4795		4.1046			3.5977	12.1271		26.9283
824005	arfaptin 1 [Rattus norvegicus]	K.HSLPSGLGLS*ETQITSHGFDSTK.E	S44	2.29515	3.5127	9717247	Q9JHU5		400966		507810	105708	1.5024e+06	ND	112618	562736	4.80389	1.5024e+06	0.200126	827.06					827.053	17.5391	3					3	6.02219					2.29515	3.5127					2.6014	17.5391
822742	arginase 1; arginase 1, liver [Rattus norvegicus]	K.GKFPDVPGFS*WVTPCISAK.D	S163	1.74412	5.2278	8392920	Q61176		402562		2137.43	ND	44931.8	961071	200209	985269	2137.43	0.0467518	0.203202			725.01	725.013	725.025	725.022	112.781			3	3	3	3			1.74412	3.27654	18.8674	14.4865			4.3158	5.2278	4.2421	4.5816			33.9852	112.781	49.4124
823961	arginase 1; arginase 1, liver [Rattus norvegicus]	K.FPDVPGFS*WVTPCISAK.D	S163	16.0418	4.2781	8392920	Q61176		402562		13548.5	ND	615095	645791	1.17708e+07	4.47365e+06	13548.5	0.952467	2.63113					994.471	994.471	51.9673					2	2					16.0418	16.6555					4.2781	3.8783					43.4475
822736	arginase 1; arginase 1, liver [Rattus norvegicus]	R.DHGDLAFVDVPNDS*PFQIVK.N	S62	1.64409	7.4651	8392920	P07824		402562		6.43144e+06	2.66723e+06	2.38777e+06	7.07769e+06	2.77124e+07	1.86197e+07	2.41128	0.337366	1.48834	1147.04	1147.04	1147.04	1147.04	1147.05	1147.05	100	2	2	2	2	2	2	11.5478	8.03289	5.47738	6.11408	13.7806	17.7228	7.3486	6.9733	6.7191	7.1436	6.6539	7.4651	100	100	100	100	100
822737	arginase 1; arginase 1, liver [Rattus norvegicus]	R.DHGDLAFVDVPNDS*PFQIVK.N	S62	0.04361	5.0548	8392920	P07824		402562		1.45617e+07	1.25344e+07	6.81309e+06	4.67999e+07	1.11204e+08	7.70509e+07	1.16174	0.145579	1.44325	765.028	765.026	765.026	765.027	765.028	765.029	100	3	3	3	3	3	3	6.69409	4.51361	4.1124	5.23317	6.90777	7.70582	4.6247	4.7465	4.8344	4.549	5.0356	5.0548	100	100	100	100	100
823796	arginase 1; arginase 1, liver [Rattus norvegicus]	K.TGLLSGLDIMEVNPT*LGKTPEEVTR.T	T281	8.81329	6.1843	8392920	P07824		402562		ND	196276	5146.57	443259	7082.3	649375	5.09488e-06	0.0116108	0.0109063						917.469	37.7424						3						8.81329						6.1843
823765	argininosuccinate synthetase (AA 1-412) [Rattus norvegicus]	K.TQDPAKAPNT*PDVLEIEFKK.G	T219	2.81326	5.5244	55767	P09034		400041	p38_Kin (T219) 0.87%	9870.98	120981	59787.7	2.12575e+06	883627	4.45504e+06	0.0815914	0.0281255	0.198343				774.388		774.39	104.384				3		3				2.81326		5.68682				5.5244		5.3892				86.7307
823772	argininosuccinate synthetase (AA 1-412) [Rattus norvegicus]	K.TQDPAKAPNT*PDVLEIEFK.K	T219	0.0501585	4.375	55767	P09034		400041	p38_Kin (T219) 0.87%	3365.38	4323.23	14092.7	1.05195e+06	32062.3	1.06036e+06	0.778441	0.0133967	0.0302372						731.695	106.522						3						10.3006						4.375
827277	argininosuccinate synthetase (AA 1-412) [Rattus norvegicus]	K.APNT*PDVLEIEFK.K	T219	4.84306	4.6379	55767	P09034		400041	p38_Kin (T219) 0.87%	613060	935098	955960	296374	380317	52115.3	0.655611	3.22552	7.29761	776.873	776.875	776.872				100	2	2	2				6.56903	8.69429	4.84306				3.8985	4.6379	3.1443				100	100	100
825546	armadillo repeat containing 1 (predicted), isoform CRA_a [Rattus norvegicus]	R.VGS*HPEGGASWLSTAANFLSR.S	S260	2.28415	5.4128	149048517	Q9NVT9	16506	402833		15976.5	20232.9	59768.9	ND	205.267	4.94394e+06	0.789627	59768.9	4.15188e-05			742.013				8.07281			3						2.28415						5.4128						8.07281
822481	arrestin, beta 1 [Rattus norvegicus]	K.DDKDEEDDGTGS*PHLNNR.-	S412*	1.41847	4.0202	6978537	Q8BWG8		414315		699802	1.07433e+06	933238	666807	1.8752e+06	1.62527e+06	0.651386	1.39956	1.15378		698.611		698.607	698.609		26.4844		3		3	3			6.13712		1.41847	4.38912			3.3188		3.9869	4.0202			26.4844		21.741	19.7187
825327	arrestin, beta 1 [Rattus norvegicus]	K.GMKDDKDEEDDGTGS*PHLNNR.-	S412*	0.676359	5.403	6978537	Q8BWG8		414315		445823	1.00449e+06	1.77638e+06	576157	1.49997e+06	125055	0.443829	3.08315	11.9945		803.996	803.992	803.995			20.7239		3	3	3				4.85898	0.676359	4.09548				4.9141	3.486	5.403				19.7187	11.1454	20.7239
827413	arrestin, beta 1 [Rattus norvegicus]	K.GMKDDKDEEDDGT*GSPHLNNR.-	T410*	1.74276	5.1752	6978537	Q8BWG8		414315	Casn_Kin1 (T410) 0.02%	284399	1.00449e+06	2909.6	2905.65	1.49997e+06	58487.5	0.283127	1.00136	25.6461		803.995					12.763		3						3.61415						5.1752						12.763
824466	aryl hydrocarbon receptor nuclear translocator 1; aryl hydrocarbon receptor nuclear translocator [Rattus norvegicus]	R.FARS*DDEQSSADKER.L	S77*	0.225183	5.7795	7549744	P27540	524	411084		5.90924e+06	5.86062e+06	914771	312805	308783	424952	1.0083	2.92441	0.726631	607.591		607.587	607.588	607.589		95.2131	3		3	3	3		6.76092		1.53234	2.23534	4.84964		4.6814		5.7795	5.4476	4.2376		95.2131		91.2825	88.6336	75.2094
822948	ASAP1 splice variant a [Rattus norvegicus] [MASS=127117]	R.TLS*DPPSPLPHGPPNK.G	S851	2.9703	2.9921	81537513	O97902	5809	416680	Akt_Kin (S201) 0.53% GSK3_Kin (S201) 0.67%	5.14782e+06	1.66129e+06	1.55258e+06	1.2487e+06	2.5252e+06	1.04164e+06	3.09868	1.24336	2.42424	867.422	867.421	867.421		867.419		-0.222764	2	2	2		2		5.99826	5.28885	5.22541		2.9703		2.9921	2.4957	2.3874		2.2413
822960	ASAP1 splice variant a [Rattus norvegicus] [MASS=127117]	R.TLS*DPPS*PLPHGPPNK.G	S851S855	4.44371	2.8677	81537513	O97902	5809	416680	Erk1_Kin (S205) 0.14% Akt_Kin (S201) 0.53% Cdc2_Kin (S205) 0.59% GSK3_Kin (S201) 0.67% p38_Kin (S205) 0.79% Cdk5_Kin (S205) 0.83%	1.15729e+06	5.44992e+06	475291	944814	869242	453746	0.21235	0.503052	1.9157		907.406			907.404		28.0643		2			2			7.33816			4.44371			2.8677			2.7189			28.0643			18.6298
823373	ash2 (absent, small, or homeotic)-like (Drosophila) (predicted) [Rattus norvegicus] [MASS=68228]	R.S*PPWEP.-	S618	3.06702	1.9151	149057828	Q9UBL3	5309			2.08926e+06	2.78672e+06	928489	1.16692e+06	1.70505e+06	7.57845e+06	0.749721	0.795676	0.224987	792.303	792.302	792.299	792.299	792.305	792.308	100	1	1	1	1	1	1	8.68354	6.7651	3.60975	3.29421	11.233	14.2369	1.8309	1.9151	1.7234	1.6671	1.6476	1.7179	100	100	100	100	100
826058	Aspartoacylase-3 [Rattus norvegicus] [MASS=35419]	R.ISVPALPGLTPSS*TQTP.-	S315	1.08255	3.3635	56789470			405267		ND	41964.4	392820	752875	1093.63	253668	2.38297e-05	0.52176	0.00431129				582.63			10.3703				3						1.08255						3.3635						10.3703
827279	Aspartoacylase-3 [Rattus norvegicus] [MASS=35419]	R.ISVPALPGLTPSST*QTP.-	T316	6.01988	2.3838	56789470			405267		6.61053e+06	7.9919e+06	6.88517e+06	3.82564e+06	5.27452e+06	3.53426e+07	0.827154	1.79975	0.14924		873.449		873.445			2.37996		2		2				10.35		6.01988				2.3838		2.3776						2.37996
822049	Aspartoacylase-3 [Rattus norvegicus] [MASS=35419]	R.ISVPALPGLTPSSTQT*P.-	T318	1.40331	3.7577	56789470			405267		4.12497e+06	8.00476e+06	5.07725e+06	4.68854e+06	1.30593e+07	2.18511e+07	0.515314	1.08291	0.597653	873.446	873.447	873.441	873.443	873.442	873.447	45.2506	2	2	2	2	2	2	7.62364	8.18495	1.40331	3.29347	2.45149	7.97303	3.0412	3.2339	3.7577	3.6097	3.7424	3.0171	22.5438	27.9961	45.2506	40.8892	27.9961
822318	astrocytic phosphoprotein [Rattus sp.]	K.DIIRQPS*EEEIIK.L	S116*	0.169716	3.9851	5640119	Q9Z297	4579	398739		1.23239e+06	1.45928e+07	1.04294e+07	5.74853e+06	4.18206e+07	1.49188e+07	0.0844514	1.81428	2.80322	825.423	825.417	825.412	825.413	825.414	825.419	100	2	2	2	2	2	2	15.0378	6.90376	1.4244	2.23661	3.57009	10.3041	3.5643	3.422	3.9851	3.5966	3.6155	3.5944	100	100	100	100	100
822525	astrocytic phosphoprotein [Rattus sp.]	K.YKDIIRQPS*EEEIIK.L	S116*	0.468837	3.4266	5640119	Q9Z297	4579	398739		804806	717105	2.89679e+06	503278	989861	1.35327e+06	1.1223	5.75585	0.731457	647.665		647.663	647.661	647.662	647.663	102.12	3		3	3	3	3	3.58067		1.41166	1.89081	1.32408	0.468837	3.1284		3.4266	2.7967	3.096	3.1781	68.8819		80.2558	68.8952	81.118
821779	AT rich interactive domain 1A (Swi1 like) (predicted) [Rattus norvegicus] [MASS=207493]	R.GPS*PSPVGSPASVAQSR.S	S314*	0.252895	5.3184	149024190	O14497	4319	398799	GSK3_Kin (S313) 0.58%	3.03559e+07	27837613	4.96072e+06	2.00193e+07	6.83298e+07	5.44414e+07	1.09046	0.247796	1.25511	830.892	830.894	830.892	830.891	830.89	830.904	60.386	2	2	2	2	2	2	4.36543	7.30981	4.58821	3.85362	2.30616	19.4364	4.5545	4.8717	5.1074	5.3184	5.171	4.6345	39.4012	44.6853	44.6853	51.1501	35.3857
828095	AT rich interactive domain 1A (Swi1 like) (predicted) [Rattus norvegicus] [MASS=207493]	R.GPS*PSPVGSPASVAQSR.S	S314*	3.80545	4.5636	149024190	O14497	4319	398799	GSK3_Kin (S313) 0.58%	238096	237698	433237	548785	475825	6214.8	1.00168	0.789448	76.5632			554.265				9.91226			3						6.01525						4.5636						9.91226
823347	AT rich interactive domain 1A (Swi1 like) (predicted) [Rattus norvegicus] [MASS=207493]	R.GPS*PS*PVGSPASVAQSR.S	S314S316*	2.53915	4.3622	149024190	O14497	4319	398799	GSK3_Kin (S315) 0.13% GSK3_Kin (S313) 0.58%	368406	1.23365e+06	634521	708186	381930	372499	0.298631	0.89598	1.02532		870.88		870.874		870.888	60.4998		2		2		2		10.2542		2.53915		18.601		4.2771		4.3622		3.8531		60.4998		59.6668
821840	AT rich interactive domain 1A (Swi1 like) (predicted) [Rattus norvegicus] [MASS=207493]	R.GPS*PSPVGS*PASVAQSR.S	S314S320*	0.614683	5.8041	149024190	O14497	4319	398799	GSK3_Kin (S319) 0.56% GSK3_Kin (S313) 0.58% p38_Kin (S319) 0.78%	3.18338e+07	1.12789e+07	1.01469e+07	1.62769e+07	2.02812e+07	9.84576e+06	2.82242	0.623391	2.05989	870.881	870.882	870.876	870.875	870.875	870.888	41.1441	2	2	2	2	2	2	11.2767	12.2188	5.0668	4.1534	4.64744	19.3707	4.1617	4.3332	5.7202	5.483	5.3872	5.8041	22.4604	26.433	36.1621	41.1441	29.2936
828060	AT rich interactive domain 1A (Swi1 like) (predicted) [Rattus norvegicus] [MASS=207493]	R.GPSPS*PVGSPASVAQSR.S	S316*	3.14913	5.0477	149024190	O14497	4319	398799	GSK3_Kin (S315) 0.13%	238096	237698	433237	547752	475825	6214.8	1.00168	0.790937	76.5632			554.263	554.263			6.63512			3	3					3.91986	3.14913					4.4076	5.0477					6.63512	5.0515
821889	AT rich interactive domain 1A (Swi1 like) (predicted) [Rattus norvegicus] [MASS=207493]	R.NPQMPQYTSPQPGSALS*PR.Q	S390	3.23507	5.9366	149024190			398799	Cdc2_Kin (S388) 0.73%	1.00278e+06	739184	43611.7	157686	4.51412e+06	1.85776e+06	1.3566	0.276572	2.42986					1068.49	1068.5	76.7921					2	2					6.43735	15.81					5.9332	5.9366					76.7921
825204	ataxia telangiectasia mutated homolog (human) (mapped), isoform CRA_a [Rattus norvegicus]	R.SAT*PANSDSESENFLR.C	T1892	0.991834	3.4784	149041675	Q62388		414029	GSK3_Kin (T1891) 0.32%	55071.1	208416	18957.8	350236	636774	45763.7	0.264237	0.0541285	13.9144				902.875			-0.409586				2						2.52668						3.4784
825817	ataxin 2 (predicted) [Rattus norvegicus] [MASS=42432]	R.TS*PAGGTWSSVVSGVPR.L	S122	3.6816	3.6461	149063395	O70305		395842		926923	1.39083e+06	3.35173e+06	7.2768e+06	3.68484e+06	1.33414e+06	0.666453	0.460605	2.76195		862.901	862.908				9.54243		2	2					3.6816	4.81213					3.3203	3.6461						9.54243
823713	ataxin 2 (predicted) [Rattus norvegicus] [MASS=42432]	R.T*SPAGGTWSSVVSGVPR.L	T121	0.776902	4.3162	149063395	O70305		395842		923146	1.43144e+06	3.30178e+06	7.02723e+06	2.61247e+06	1.23734e+06	0.644909	0.469855	2.11135		862.912	862.909	862.909	862.908	862.905	67.8048		2	2	2	2	2		9.9083	5.44988	5.58902	5.16579	1.62917		4.0594	4.3162	4.2109	3.532	3.8386		64.5504	58.7319	57.9511	64.0649
821806	ataxin 2 (predicted) [Rattus norvegicus] [MASS=42432]	R.ALT*PSIEAK.D	T196	0.633979	2.4271	149063395	O70305		395842		3.22372e+06	5.74069e+06	2.39215e+06	3.87018e+06	4.78015e+06	1.49573e+06	0.561556	0.618097	3.19587	1009.5	1009.5	1009.5	1009.5	1009.5	1009.51	44.9354	1	1	1	1	1	1	3.05102	1.1788	2.93215	4.14066	6.49825	17.6223	2.2921	2.4073	2.4271	2.0735	2.1111	1.9157	39.4012	44.9354	32.5648	26.1101	35.563
822793	ataxin 2 (predicted) [Rattus norvegicus] [MASS=42432]	R.ALT*PSIEAK.D	T196	0.257554	3.2786	149063395	O70305		395842		6.1285e+06	1.46717e+07	9.31419e+06	1.52743e+07	1.32896e+07	6.06569e+06	0.41771	0.609794	2.19095	505.252	505.252	505.253	505.254	505.254	505.258	44.6853	2	2	2	2	2	2	0.80238	0.742944	2.80337	3.7048	4.67558	12.2931	2.8635	3.2786	2.7531	3.0544	2.5958	2.679	44.6853	44.6853	44.6853	44.6853	44.6853
821915	ataxin 2-like (predicted), isoform CRA_a [Rattus norvegicus] [MASS=28198]	K.GPPQS*PVFEGVYNNSR.M	S109*	0.0820656	5.4109	149067895	Q8WWM7	6394	405815	p38_Kin (S58) 0.05%	2.9186e+06	2.75683e+06	1.48228e+07	8.21136e+06	8.59408e+06	5.4834e+06	1.05868	1.80516	1.56729	914.417	914.419	914.412	914.413	914.412	914.421	143.397	2	2	2	2	2	2	11.2483	13.5953	5.63514	6.63633	6.23695	15.9861	4.501	5.0687	5.4109	5.089	4.9802	5.0273	73.3005	107.693	143.397	118.198	119.103
821970	ataxin 2-like (predicted), isoform CRA_b [Rattus norvegicus] [MASS=51253]	K.EVDGLLTSDPMGS*PVSSK.T	S347*	5.38219	5.4624	149067896	Q7TQH0		405815		4.41913e+07	4.40662e+06	358950	273997	1.11666e+07	1.08898e+06	10.0284	1.31005	10.2542		949.938	949.932		949.932	949.936	64.3411		2	2		2	2		12.7076	6.47231		5.70343	10.0112		5.3716	5.4624		5.172	3.0594		64.3411	24.6479		37.6956
822013	ataxin 2-like (predicted), isoform CRA_b [Rattus norvegicus] [MASS=51253]	K.STSTPTS*PGPR.T	S437	0.907921	2.4747	149067896	Q8WWM7	6394	405815	Cdc2_Kin (S767) 0.2% Erk1_Kin (S767) 0.23% Cdk5_Kin (S767) 0.31% p38_Kin (S767) 0.71% GSK3_Kin (S767) 0.79%	4.64313e+06	1.06534e+06	4.01295e+06	1.58709e+06	52389.9	596118	4.35836	2.52849	0.0878851		584.258		584.258	584.255		28.1518		2		2	2			4.63379		3.06636	0.907921			2.2879		2.1839	2.4747			28.1518		16.9461	16.9461
824476	ataxin 2-like (predicted), isoform CRA_b [Rattus norvegicus] [MASS=51253]	R.QGSGRES*PSLVSR.E	S93*	0.152813	3.0588	149067896	Q7TQH0		405815		1.64322e+06	1.76575e+06	1.01875e+06	1.80171e+06	1.97145e+06	3.60149e+06	0.93061	0.565437	0.547399		480.56	480.56	480.56	480.564		27.8076		3	3	3	3			1.04191	0.152813	0.909934	10.3912			2.6338	2.8015	2.8589	3.0588			23.9769	26.4844	27.8076	16.2197
821782	ATP citrate lyase [Rattus norvegicus]	R.TAS*FSESR.A	S454*	0.145171	2.7463	8392839	P53396	155	404975	Akt_Kin (S454) 0.1%	1.1594e+07	2.32569e+07	5.39298e+07	4.36431e+07	3.62504e+06	4.91078e+06	0.498517	1.2357	0.73818	482.694	482.695	482.693	482.693	482.692	482.696	26.0224	2	2	2	2	2	2	3.94035	5.32984	1.151	2.10498	0.145171	7.85993	2.3501	2.7463	2.3387	2.4272	2.2074	2.349	19.8227	17.7936	26.0224	22.6067	16.118
822418	ATP citrate lyase [Rattus norvegicus]	R.TAS*FSESRADEVAPAK.K	S454*	0.0916499	4.079	8392839	P53396	155	404975	Akt_Kin (S454) 0.1%	1.16265e+07	1.96765e+07	2.3151e+06	8.28302e+06	7.06813e+06	2.21679e+07	0.590881	0.279499	0.318846	873.396	873.398	873.395	873.39	873.406	873.398	17.336	2	2	2	2	2	2	6.52428	7.9162	4.98344	0.956597	17.5736	7.92192	4.079	3.1129	3.1004	3.123	2.9039	3.1202	17.336	6.07455	9.55447	8.93947	12.0862
822662	ATP citrate lyase [Rattus norvegicus]	R.TAS*FSESRADEVAPAK.K	S454*	0.223397	3.8764	8392839	P53396	155	404975	Akt_Kin (S454) 0.1%	2.85394e+06	6.84464e+06	1.09964e+06	3.29684e+06	1.40449e+06	4712712	0.416959	0.333545	0.298022	582.599	582.598	582.599	582.599	582.6	582.601	50.6181	3	3	3	3	3	3	3.99821	3.05308	3.8951	3.99821	6.8336	8.19687	3.3878	3.0408	2.9934	3.8764	3.3272	3.4161	50.6181	35.0978	19.7344	37.6943	35.5806
826638	ATP citrate lyase [Rattus norvegicus]	R.TASFS*ESRADEVAPAK.K	S456*	4.47937	2.8604	8392839	P53396	155	404975		4.60725e+06	1.97403e+07	2.3151e+06	5.37841e+06	1.76464e+06	1.4013e+07	0.233394	0.430442	0.125929	873.395	873.396					7.78151	2	2					4.47937	6.59302					2.8604	2.7006					7.78151
824437	ATP citrate lyase [Rattus norvegicus]	K.AKPAMPQDS*VPSPR.S	S477*	12.3082	3.19	8392839	P53396	155	404975		12556.6	712219	26881.5	89410	5.89305e+06	729686	0.0176302	0.300654	8.07614					780.875		17.2389					2						12.3082						3.19						17.2389
821788	ATP citrate lyase [Rattus norvegicus]	K.PAMPQDSVPS*PR.S	S480*	0.205642	4.2525	8392839	P53396	155	404975		1.06577e+08	1.18027e+08	5.95707e+06	4.30523e+06	7.35179e+07	1.18288e+08	0.902992	1.38368	0.621514	681.303	681.304	681.301	681.304	681.304	681.308	61.229	2	2	2	2	2	2	4.50941	5.94154	1.63779	5.85341	6.03701	12.9332	3.883	4.1863	3.8504	4.2525	4.067	3.9917	43.4475	61.229	51.1501	61.229	51.9673
822658	ATP citrate lyase [Rattus norvegicus]	K.AKPAMPQDSVPS*PR.S	S480*	1.35834	4.4596	8392839	P53396	155	404975		2.91248e+06	5.39645e+06	3.82664e+06	3.27311e+06	5.72133e+06	1.12835e+07	0.539704	1.16911	0.507052	780.87	780.875	780.867	780.868	780.868	780.872	37.4269	2	2	2	2	2	2	5.1258	11.533	1.35834	2.69105	2.84483	8.00904	3.6753	4.163	4.0809	4.1486	4.0108	4.4596	28.1518	28.1518	28.396	34.3832	28.1518
822770	ATP citrate lyase [Rattus norvegicus]	R.T*ASFSESRADEVAPAK.K	T452*	0.509802	3.42	8392839	P53396	155	404975		1.16265e+07	1.96765e+07	2.3151e+06	6.4948e+06	1.9402e+06	2.21679e+07	0.590881	0.356454	0.0875229	873.395	873.398	873.396	873.393	873.392	873.396	15.8433	2	2	2	2	2	2	5.0579	8.55201	6.17487	3.16764	1.70125	5.8942	3.0574	2.9725	3.42	3.2573	2.7572	2.76	9.20819	7.31499	10.7918	15.8433	9.20819
825716	Atp8b2 protein [Rattus norvegicus] [MASS=62039]	K.STSAPQMS*PGSSDNQSSSPQPAQQK.L	S492*	1.90269	4.9202	66911473	Q14157		405393		1.59997e+06	1.35384e+06	1.32284e+06	2.27297e+06	684404	64734.4	1.1818	0.581987	10.5725	1306.56	1306.57	1306.56	1306.56			34.5908	2	2	2	2			6.08704	15.5275	5.43622	8.518			4.9202	4.3068	4.6578	4.7226			30.193	25.5751	17.348	34.5908
822092	Atp8b2 protein [Rattus norvegicus] [MASS=62039]	K.STSAPQMSPGS*SDNQSSSPQPAQQK.L	S495*	0.918803	4.784	66911473	Q14157		405393		4.79165e+06	1.98182e+06	3.40106e+06	862397	686776	4.25149e+06	2.4178	3.94373	0.161538	871.373	871.379	871.373	871.374	871.376	871.379	25.5907	3	3	3	3	3	3	3.86279	11.014	4.49446	5.731	7.92844	11.014	4.518	4.5415	4.3328	4.784	4.0835	4.4112	13.4324	14.6862	17.7936	25.5907	14.6862
823013	Atp8b2 protein [Rattus norvegicus] [MASS=62039]	K.STSAPQMSPGS*SDNQSSSPQPAQQK.L	S495*	1.97542	4.4716	66911473	Q14157		405393		569590	1.35384e+06	1.32284e+06	2.27799e+06	684404	19154.1	0.420723	0.580702	35.7314	1306.57	1306.56		1306.56	1306.55		34.258	2	2		2	2		11.6955	11.2284		7.49202	3.91259		3.3635	4.2952		4.4716	4.3259		13.8917	34.258		24.3136	16.9461
826457	Atp8b2 protein [Rattus norvegicus] [MASS=62039]	K.STSAPQMSPGSS*DNQSSSPQPAQQK.L	S496*	1.51985	4.4205	66911473	Q14157		405393	GSK3_Kin (S471) 0.29%	4.79165e+06	1.10022e+06	2.88936e+06	1.06002e+07	1.08777e+07	868821	4.35518	0.272575	12.5201	871.372	871.373					20.096	3	3					3.05118	3.81685					3.8452	4.4205					20.096	10.8814
825715	Atp8b2 protein [Rattus norvegicus] [MASS=62039]	K.STSAPQMSPGSSDNQS*SSPQPAQQK.L	S500*	3.65223	4.4433	66911473	Q14157		405393		2.23195e+06	2.28391e+06	3.79939e+06	4.75572e+06	731376	1.29255e+06	0.977253	0.798908	0.565841	871.379	871.373		871.372			21.214	3	3		3			11.6457	4.21499		3.65223			3.3356	4.4433		4.104			20.1368	14.8686		21.214
826344	Atp8b2 protein [Rattus norvegicus] [MASS=62039]	K.STSAPQMSPGSSDNQS*SSPQPAQQK.L	S500*	3.65989	4.6365	66911473	Q14157		405393		1.74842e+06	1.36263e+06	1.32284e+06	2.27799e+06	680188	64734.4	1.28312	0.580702	10.5074	1306.55	1306.56					32.1525	2	2					3.65989	6.83738					3.3677	4.6365					10.9255	32.1525
825770	Atp8b2 protein [Rattus norvegicus] [MASS=62039]	K.STSAPQMSPGSSDNQSS*SPQPAQQK.L	S501*	4.84666	4.9356	66911473	Q14157		405393		2.76202e+06	1.32711e+06	3.39521e+06	3.33261e+06	ND	250049	2.08123	1.01878	3.99922e-06				871.373			13.9358				3						4.84666						4.9356						13.9358
825714	Atp8b2 protein [Rattus norvegicus] [MASS=62039]	K.STSAPQMSPGSSDNQSSS*PQPAQQK.L	S502*	4.14225	4.8265	66911473	Q14157		405393		2.91903e+06	1.98625e+06	3.69294e+06	4.30444e+06	723797	256327	1.46962	0.857937	2.82373		871.379		871.373			28.8307		3		3				10.7078		4.14225				3.0206		4.8265				7.78151		28.8307
825462	ATP-binding cassette, sub-family F (GCN20), member 1 [Rattus norvegicus]	K.NKPSATDS*EGEDDEDMTK.E	S100	0.0634529	4.3407	27704250	Q6MG08		395553	Casn_Kin2 (S100) 0.27%	915931	1.34551e+06	2.38678e+06	654006	1700.27	11608	0.68073	3.64948	0.146474	683.595	683.594	683.592				30.2302	3	3	3				3.1043	1.58144	0.473456				4.1196	4.3407	3.6192				30.2302	19.2072	3.0553
827121	ATP-binding cassette, sub-family F (GCN20), member 1 [Rattus norvegicus]	K.NKPS*ATDSEGEDDEDMTK.E	S96	4.35383	5.4453	27704250	Q6MG08		395553		2.17623e+06	4.00759e+06	ND	ND	740041	330561	0.543026	1	2.23874		683.596					10.9255		3						4.35383						5.4453						10.9255
826342	ATP-binding cassette, sub-family F (GCN20), member 1 [Rattus norvegicus]	K.NKPS*ATDS*EGEDDEDMTK.E	S96S100	3.3494	4.5016	27704250	Q6MG08		395553	Casn_Kin2 (S100) 0.27%	3.69702e+06	319532	ND	3627.05	189666	39813.4	11.5701	0.000275706	4.76387	710.252	710.251					55.0625	3	3					4.81036	3.9507					4.5016	3.2509					55.0625	9.5498
826343	ATP-binding cassette, sub-family F (GCN20), member 1 [Rattus norvegicus]	K.NKPS*ATDS*EGEDDEDMTK.E	S96S100	4.64594	3.9691	27704250	Q6MG08		395553	Casn_Kin2 (S100) 0.27%	6.80143e+06	4242	ND	ND	594581	ND	1603.36	1	594581	1064.87						85.58	2						4.64594						3.9691						85.58
822635	ATP-binding cassette, sub-family F (GCN20), member 1 [Rattus norvegicus]	K.NKPSAT*DSEGEDDEDMTK.E	T98	0.527147	5.3285	27704250	Q6MG08		395553		3.7624e+06	4.13903e+06	2.18685e+06	259119	1.65708e+06	626112	0.909004	8.43956	2.64662	1024.89	1024.89	1024.89		1024.9		51.3101	2	2	2		2		5.07621	4.48073	0.527147		17.9422		4.7972	5.3285	4.0888		5.0292		44.6853	51.3101	37.9745		42.4279
827644	ATP-binding cassette, sub-family F (GCN20), member 1 [Rattus norvegicus]	K.NKPSAT*DSEGEDDEDMTK.E	T98	1.58144	3.8661	27704250	Q6MG08		395553		604301	319722	15180.8	178144	57107	13373	1.89008	0.0852167	4.27031	683.594						1.01709	3						1.58144						3.8661						1.01709
824259	ATP-binding cassette, sub-family F (GCN20), member 1 [Rattus norvegicus]	K.NKPSAT*DS*EGEDDEDMTK.E	T98S100	0.746924	5.9337	27704250	Q6MG08		395553	Casn_Kin2 (S100) 0.27%	6.80143e+06	4.09213e+06	7.56035e+06	4.19081e+06	1.83007e+06	18857.1	1.66207	1.80403	97.0496	1064.87	1064.88	1064.87		1064.88		61.4848	2	2	2		2		4.30302	9.57839	1.66296		8.20201		4.0327	5.0253	5.9337		5.131		61.4549	57.9148	49.2595		61.4848
826304	ATP-binding cassette, sub-family F (GCN20), member 1 [Rattus norvegicus]	K.NKPSAT*DS*EGEDDEDMTK.E	T98S100	3.69233	4.6752	27704250	Q6MG08		395553	Casn_Kin2 (S100) 0.27%	3.69702e+06	2.38148e+06	4.05058e+06	3.34075e+06	891737	31200.6	1.5524	1.21248	28.5807	710.252	710.252					17.688	3	3					5.67001	5.5009					4.6752	4.5214					17.688	15.0232
825625	atypical PKC specific binding protein [Rattus norvegicus]	R.RS*SDPALTGLSTSVSDNNFSSEEPSR.K	S143*	1.29776	6.6775	3868778	Q99NH2		415782		8674.17	245941	5.1539e+06	4.09607e+06	639491	5.45655e+06	0.0352693	1.25826	0.117197			940.755	940.752			20.5056			3	3					6.49233	2.85437					6.6775	5.8147					19.5424	20.5056
823767	atypical PKC specific binding protein [Rattus norvegicus]	R.RSS*DPALTGLSTSVSDNNFSSEEPSR.K	S144*	0.322668	6.3965	3868778	Q99NH2		415782	PKA_Kin (S144) 0.7%	426916	885449	5.15924e+06	1.22669e+07	411209	5.46366e+06	0.482146	0.420584	0.0752626	940.759	940.758	940.749	940.755	940.745	940.766	14.9642	3	3	3	3	3	3	10.6479	9.58423	0.322668	6.55616	4.35072	18.6329	5.7676	5.9461	6.3965	5.8596	5.551	6.1719	9.08485		14.9642	13.6248
824598	atypical PKC specific binding protein [Rattus norvegicus]	R.AGS*PNRDVGPSLGLK.K	S873*	0.226134	2.9529	3868778	Q9Z340		415782	Cdc2_Kin (S873) 0.87%	1.88234e+06	8.00302e+06	3.68749e+06	9.63924e+06	5.45419e+06	3.20354e+06	0.235204	0.38255	1.70255	774.389	774.387	774.383	774.385		774.393	54.7711	2	2	2	2		2	8.82559	6.38339	0.226134	2.67483		13.1608	2.664	2.9529	2.8276	2.9049		2.5864	43.144	41.9135	54.7711	43.9547
825575	atypical PKC specific binding protein [Rattus norvegicus]	R.RSSDPALT*GLSTSVSDNNFSSEEPSR.K	T149*	2.84728	5.4619	3868778	Q99NH2		415782		4882.5	13030.7	1.93505e+06	1.22802e+07	554730	5.49918e+06	0.374691	0.157574	0.100875			940.752	940.752			14.18			3	3					2.84728	2.84728					5.4619	4.4511					6.56882	14.18
823279	Autophagy-related 4B (yeast) [Rattus norvegicus]	R.FFDS*EDEDFEILSL.-	S214	2.81119	3.0871	68533688	Q6PZ03	16499	405899		1.36056e+07	2.75659e+07	5.30247e+06	5.32665e+06	5.1305e+06	130423	0.493566	0.995461	39.3375		893.371	893.363		893.366	893.371	156.631		2	2		2	2		11.5583	2.81119		5.33677	11.2167		3.0871	2.2405		2.412	2.9399		121.915	76.6256		61.8226
827130	Autophagy-related 4B (yeast) [Rattus norvegicus]	R.FFDS*EDEDFEILSL.-	S214	12.1687	2.2283	68533688	Q6PZ03	16499	405899		1976.62	112573	38618.8	ND	ND	10929.8	0.0175586	38618.8	9.1493e-05		1785.74					51.326		1						12.1687						2.2283						51.326
824668	BAF60b [Rattus norvegicus]	K.ADGDNSGTAGT*PGGTPAADK.V	T155	17.2739	4.8445	2723484	O54772		401087	Casn_Kin1 (T155) 0.68%	781986	35128.3	236951	84012.5	77608	460081	22.2609	2.82042	0.168683						920.389	42.4584						2						17.2739						4.8445
826622	basement membrane-associated chondroitin proteoglycan Bamacan [Rattus norvegicus]	K.KGDVEGS*QSQDEGEGSGESER.G	S1065*	2.78609	6.1784	1785540	Q9UQE7	5829	403232	DNA_PK (S1065) 0.67% ATM_Kin (S1065) 0.83%	6.19689e+06	405810	40634.9	50647	17122.5	60662.8	15.2704	0.802316	0.282257	749.63	749.631					72.6004	3	3					2.78609	5.14936					6.1784	5.1317					71.0508	72.6004
822731	basement membrane-associated chondroitin proteoglycan Bamacan [Rattus norvegicus]	K.KGDVEGSQS*QDEGEGSGESER.G	S1067*	0.400557	7.6957	1785540	Q9UQE7	5829	403232	DNA_PK (S1067) 0.08% ATM_Kin (S1067) 0.14%	6.19722e+06	809036	5.02547e+06	7.02934e+06	4.30473e+06	1.15468e+07	7.66001	0.714928	0.372808	749.629	749.631	749.631	749.631	749.639	749.633	30.2302	3	3	3	3	3	3	1.64673	4.3349	4.25479	4.6598	14.767	7.67729	7.6957	7.2433	7.5845	7.1386	7.0902	7.2849	18.3674	30.2302	14.3391	30.2302	21.741
822732	basement membrane-associated chondroitin proteoglycan Bamacan [Rattus norvegicus]	K.KGDVEGSQS*QDEGEGSGESER.G	S1067*	0.0445064	5.6703	1785540	Q9UQE7	5829	403232	DNA_PK (S1067) 0.08% ATM_Kin (S1067) 0.14%	2.41825e+06	4.15321e+06	1.95503e+06	3.15979e+06	469502	2.95436e+06	0.582259	0.618719	0.158919	1123.94	1123.95	1123.94	1123.94	1123.94	1123.95	51.1501	2	2	2	2	2	2	4.82892	8.5229	0.591935	3.96105	0.382755	8.5229	5.0416	5.2127	5.6703	5.4104	4.8013	4.4761	44.9354	39.2689	39.2689	51.1501	39.2689
823691	basement membrane-associated chondroitin proteoglycan Bamacan [Rattus norvegicus]	K.GDVEGSQS*QDEGEGSGESER.G	S1067*	18.029	4.1193	1785540	Q9UQE7	5829	403232	DNA_PK (S1067) 0.08% ATM_Kin (S1067) 0.14%	ND	35214.1	38188.4	51529.6	29108.4	155290	2.83977e-05	0.741097	0.187445						1059.91	39.2689						2						18.029						4.1193
826882	Basic leucine zipper and W2 domains 1 [Rattus norvegicus]	K.NAEEES*ESEAEEGD.-	S411	1.33997	3.5681	38181837	Q7L1Q6	16570	403199	Casn_Kin2 (S411) 0.04%	8.40936e+06	1.05049e+06	1.94539e+07	2.92966e+06	537972	8.74082e+06	8.00517	6.64035	0.0615471	802.766	802.766	802.762				35.3857	2	2	2				7.65336	8.10832	2.78589				3.271	2.866	3.5681				35.3857	4.58638	22.4115
826951	Basic leucine zipper and W2 domains 1 [Rattus norvegicus]	K.NAEEES*ESEAEEGD.-	S411	5.56552	3.2167	38181837	Q7L1Q6	16570	403199	Casn_Kin2 (S411) 0.04%	1.51622e+06	198872	7.7238e+06	1.66711e+06	455270	555592	7.6241	4.63305	0.819433	1604.54		1604.52				29.8287	1		1				19.6442		5.56552				3.2167		3.0769				12.3145		29.8287
826953	Basic leucine zipper and W2 domains 1 [Rattus norvegicus]	K.NAEEES*ES*EAEEGD.-	S411S413	1.40696	3.2066	38181837	Q7L1Q6	16570	403199	Casn_Kin2 (S411) 0.04%	2.29445e+06	160138	4.03628e+07	7.30202e+06	513733	1.07634e+07	14.3279	5.52762	0.0477298	842.747		842.745				100	2		2				4.73735		2.63582				2.6765		3.2066				100		100
827890	Basic leucine zipper and W2 domains 1 [Rattus norvegicus]	K.NAEEES*ES*EAEEGD.-	S411S413	4.78484	3.4208	38181837	Q7L1Q6	16570	403199	Casn_Kin2 (S411) 0.04%	113354	ND	5.94308e+06	1.70479e+06	17393.4	ND	113354	3.48611	17393.4			1684.49				100			1						4.85608						3.4208						100
826885	Basic leucine zipper and W2 domains 1 [Rattus norvegicus]	K.NAEEESES*EAEEGD.-	S413	1.33997	3.4039	38181837	Q7L1Q6	16570	403199		8.40936e+06	1.05049e+06	1.16962e+07	2.92966e+06	537972	1.55844e+06	8.00517	3.99234	0.3452	802.765		802.762	802.761			42.4279	2		2	2			6.20746		2.86067	1.33997			3.3744		3.4039	2.821			9.0759		42.4279	9.47294
824596	BAT3 [Rattus norvegicus]	R.T*SPEPQREDASPAPGTTAEEAMSR.G	T978*	0.435435	5.2652	4587081	Q6MG49		411867		9.132e+06	1.02761e+07	3.92099e+06	5.7994e+06	1.77501e+06	1.985e+06	0.888664	0.676104	0.894212	865.713	865.713	865.707	865.709		865.713	76.7446	3	3	3	3		3	8.8936	7.75686	1.55678	3.74165		8.32715	4.9062	5.0061	5.2652	5.0811		4.0114	67.1439	58.5591	76.7446	45.9877
825140	B-cell CLL/lymphoma 9-like (predicted), isoform CRA_a [Rattus norvegicus]	R.SVS*VDSGEQR.E	S118	0.279851	2.8727	149041482	-	10612	401967	Akt_Kin (S118) 0.03% Clk2_Kin (S118) 0.32%	1.29279e+06	255186	59624.8	473700	91739.7	5219.43	5.06609	0.12587	17.5766				572.239			39.8691				2						2.50116						2.8727						39.8691
825669	B-cell CLL/lymphoma 9-like (predicted), isoform CRA_a [Rattus norvegicus]	R.EAPGS*PPLSPR.G	S21*	3.76405	2.0412	149041482	-	10612	401967	GSK3_Kin (S21) 0.15% Erk1_Kin (S21) 0.46% Cdc2_Kin (S21) 0.72%	5.59951e+06	3.64856e+06	3.26418e+06	8.6341e+06	1236676	296472	1.53472	0.378057	4.17131				594.279			51.935				2						3.76405						2.0412						51.935
822931	B-cell CLL/lymphoma 9-like (predicted), isoform CRA_a [Rattus norvegicus]	R.EAPGS*PPLS*PR.G	S21S25*	1.1992	2.5839	149041482	-	10612	401967	Cdc2_Kin (S25) 0.04% Erk1_Kin (S25) 0.06% Cdk5_Kin (S25) 0.12% GSK3_Kin (S21) 0.15% Erk1_Kin (S21) 0.46% GSK3_Kin (S25) 0.68%	5.29477e+06	5.62877e+06	5898683	1.3984e+07	3.19522e+06	3.12476e+06	0.940662	0.421816	1.02255			634.26	634.261	634.265		100			2	2	2				1.1992	2.92699	8.03142				2.5839	2.0349	2.1198				100	100	100
823139	Bcl-2 associated death promoter [Rattus norvegicus]	R.SRS*APPNLWAAQR.Y	S137*	0.971485	4.069	2290970	Q92934	4409	407390	1433_m1 (S136) 00% Akt_Kin (S136) 0.01%	7.57112e+06	1.43065e+07	1.00196e+07	9.82935e+06	2.35501e+07	6.43861e+06	0.529209	1.01935	3.65763	767.377	767.376	767.372	767.371	767.384	767.38	35.1415	2	2	2	2	2	2	8.99758	7.65447	2.64061	2.08641	18.6405	14.0244	4.069	3.8119	2.8271	3.2225	3.2674	3.0067	29.0327	29.0327	35.1415	25.4218	30.0607
823185	Bcl-2 associated death promoter [Rattus norvegicus]	R.S*APPNLWAAQR.Y	S137*	1.88284	3.0952	2290970	Q92934	4409	407390	1433_m1 (S136) 00% Akt_Kin (S136) 0.01%	8.27926e+06	1.66961e+07	5.9701e+06	2.29819e+07	6.35099e+06	1.93919e+07	0.495879	0.259774	0.327508	645.81	645.808	645.805	645.804	645.811	645.807	100	2	2	2	2	2	2	10.3904	7.93424	3.2078	1.88284	11.8161	5.19136	2.5856	2.911	2.6455	2.5497	2.8012	3.0952	100	100	100	100	100
823167	Bcl-2 associated death promoter [Rattus norvegicus]	R.RMS*DEFEGSFK.G	S156*	1.73444	3.7622	2290970	Q61337		407390	PKA_Kin (S155) 0.2%	15182.5	19641.6	9.26362e+06	8.49259e+06	1.12396e+06	9.36987e+06	0.772977	1.09079	0.119955			706.784	706.783	706.785	706.789	119.826			2	2	2	2			3.37685	2.08133	5.28118	10.9871			3.4263	3.0498	3.0208	3.7622			108.231	93.826	76.6883
825834	Bcl2-associated athanogene 3 (predicted) [Rattus norvegicus] [MASS=61490]	R.S*QSPAASDCSSSSSSASLPSSGR.S	S174*	4.35542	3.7388	55249759	O95817	4860	406862		33501.7	ND	951152	ND	23206.1	187254	33501.7	951152	0.123929			760.644				10.4576			3						4.43876						3.7388						10.4576
827332	Bcl2-associated athanogene 3 (predicted) [Rattus norvegicus] [MASS=61490]	R.S*QSPAASDCSSSSSSASLPSSGR.S	S174*	1.09653	4.1301	55249759	O95817	4860	406862		2.22625e+06	179328	899871	ND	6.83813e+06	1.20611e+06	12.4144	899871	5.66957	1140.46						46.9013	2						1.09653						4.1301						46.9013
823415	Bcl2-associated athanogene 3 (predicted) [Rattus norvegicus] [MASS=61490]	R.SQS*PAASDCSSSSSSASLPSSGR.S	S176*	1.2325	5.6294	55249759	O95817	4860	406862	GSK3_Kin (S173) 0.61%	2.23635e+06	1.12456e+07	985401	2.0498e+06	7.3867e+06	1.19884e+07	0.198864	0.48073	0.616154	1140.46		1140.47			1140.47	-0.315171	2		2			2	2.38167		7.09234			13.9477	5.6294		5.551			5.1987
821929	BCL2-associated transcription factor 1, isoform CRA_a [Rattus norvegicus]	R.IDIS*PSALR.K	S658*	0.589623	3.5177	149039639	Q8K019				7.21889e+06	3.40754e+06	3.64212e+06	7596329	2.05383e+06	2.17216e+06	2.11851	0.479458	0.945524	526.265	526.265	526.264	526.264	526.265	526.269	44.9354	2	2	2	2	2	2	4.6504	3.84205	1.52161	2.21584	4.18441	11.1552	3.5143	3.5177	3.3392	3.343	3.2329	2.8331	35.3857	32.342	25.8003	44.9354	16.118
822450	BCL2-associated transcription factor 1, isoform CRA_a [Rattus norvegicus]	R.RIDIS*PSALR.K	S658*	1.79692	2.6713	149039639	Q8K019				4.08982e+06	4.84683e+06	6.07997e+06	1.11939e+06	2184116	87597.6	0.843813	5.43148	24.9335		604.305	604.315	604.315	604.318		26.0224		2	2	2	2			14.2762	1.89629	2.40141	7.35326			2.4331	2.4007	2.5936	2.6713				26.0224	17.7936	7.78151
826089	BCL2-associated transcription factor 1, isoform CRA_a [Rattus norvegicus]	R.RIDISPS*ALR.K	S660*	2.93138	2.7195	149039639	Q8K019				281862	1.59223e+06	1.24872e+07	1.22646e+07	3695.33	515248	0.177023	1.01815	0.00717195		604.315					9.0759		2						2.93138						2.7195						9.0759
822905	Bcl-2-interacting death suppressor [Rattus norvegicus] [MASS=61524]	R.S*QSPAASDCSSSSSSASLGSSGR.S	S174	2.25012	5.2057	108937164					1.1033e+06	7.11207e+06	651073	846580	1.73382e+06	1.33715e+06	0.15513	0.769063	1.29665	747.302	747.302		747.299	747.303	747.303	53.5248	3	3		3	3	3	6.41995	6.33959		2.25012	8.05395	7.72804	4.5909	5.2057		4.8876	5.1201	4.1452	26.4677	53.5248		5.83577	29.5493
822081	Bcl-2-interacting death suppressor [Rattus norvegicus] [MASS=61524]	R.SQS*PAASDCSSSSSSASLGSSGR.S	S176	0.397343	5.6803	108937164					1.1033e+06	6792392	730166	2.96537e+06	5.12166e+06	473813	0.162431	0.246231	10.8095	747.302	747.302		747.3	747.3	747.3	31.4588	3	3		3	3	3	6.29941	6.41995		3.47786	4.29486	4.12967	2.9854	4.739		5.3552	5.6803	4.0447	22.833	31.4588		20.8039	10.3253
822082	Bcl-2-interacting death suppressor [Rattus norvegicus] [MASS=61524]	R.SQS*PAASDCSSSSSSASLGSSGR.S	S176	0.0491098	6.132	108937164					1.70249e+06	7.18979e+06	2.92067e+06	7.27027e+06	7.14126e+06	1.55203e+06	0.236793	0.401728	4.60123	1120.45	1120.45		1120.45	1120.45	1120.45	-0.268721	2	2		2	2	2	9.9692	10.3174		6.91551	4.41094	8.00484	5.7004	5.5333		6.132	5.4405	5.7136
822149	Bcl-2-interacting death suppressor [Rattus norvegicus] [MASS=61524]	K.AAPS*PAPAEAAPLK.S	S401	0.0875483	2.9799	108937164					4.82939e+06	1.43096e+07	3.92866e+06	2.43005e+06	8.26677e+06	3669242	0.337493	1.6167	2.25299	685.842	685.842	685.84	685.843	685.841	685.85	100	2	2	2	2	2	2	4.00532	4.27526	0.620134	5.61036	2.04279	14.7809	2.7419	2.9799	2.7889	2.8795	2.5746	2.2108	100	100	100	100	100
825829	beta II spectrin-short isoform [Rattus norvegicus]	K.VSEEAESQQWDTSKGDQVS*QNGLPAEQGSPR.M	S26*	13.4149	4.7587	18032222	Q62261		398411	DNA_PK (S2127) 0.82%	ND	14116.7	1.24586e+06	ND	459675	83874.6	7.08381e-05	1.24586e+06	5.4805			1142.18				27.013			3						13.4149						4.7587						27.013
826030	beta II spectrin-short isoform [Rattus norvegicus]	K.VSEEAESQQWDTSKGDQVSQNGLPAEQGS*PR.M	S36*	6.28118	5.6128	18032222	Q62261		398411		ND	102834	1.24586e+06	ND	443251	61827.6	9.72437e-06	1.24586e+06	7.16914			1142.18				43.7159			3						11.917						5.6128						43.7159
827460	beta II spectrin-short isoform [Rattus norvegicus]	K.GDQVSQNGLPAEQGS*PR.M	S36*	1.00561	4.3365	18032222	Q62261		398411		1.45408e+06	4.66568e+06	268916	928246	89279	162355	0.311656	0.289703	0.549901	910.407	910.408					113.809	2	2					5.83029	6.76994					4.3365	3.4291					113.809	91.3999
823598	beta prime COP [Rattus norvegicus]	R.ATAQQEPDGKPAS*SPVIMASQTTHK.E	S859	11.1004	4.477	2454309	O35142				785870	4.25852e+06	376771	27298.7	132828	1.00749e+06	0.184541	13.8018	0.13184						887.428	17.3798						3						11.1004						4.477
824661	beta-actin [Rattus norvegicus]	K.S*YELPDGQVITIGNER.F	S239	18.4404	2.8112	55575	P84185	15	413405		181717	128698	42055.1	34768.6	88622.8	1.28403e+06	1.41196	1.20957	0.0690191						935.951	127.132						2						19.5468						2.8112
822440	beta-catenin [Rattus norvegicus]	R.RTS*MGGTQQQFVEGVR.M	S552*	1.96147	5.0187	4731569	P35222	286	406114	PKA_Kin (S552) 0.18% Akt_Kin (S552) 0.61%	19099.3	59033.9	3211.1	4678.68	716206	67659.2	0.323531	0.686327	10.5855					930.934		14.9642					2						9.70519						5.0187						14.9642
823987	beta-globin (AA 1-147) [Rattus norvegicus]	K.EFTPS*AQAAFQK.V	S126	1.36692	4.8204	55825			403373		559993	2.47716e+06	3.02314e+06	4.7085e+06	1.28837e+06	119212	0.226062	0.64206	10.8074			702.801	702.816		702.812	35.3857			2	2		2			17.1864	3.2393		1.36692			4.8204	2.9606		3.2363			35.3857	26.0224
822512	beta-globin (AA 1-147) [Rattus norvegicus]	K.VVAGVAS*ALAHK.Y	S140	0.0831511	4.8698	55823	P02091		415423		1.14666e+07	1.99445e+07	5.05188e+06	39950615	4.06366e+06	3.47366e+07	0.574927	0.126453	0.116985	601.82	601.819	601.819	601.82	601.824	601.827	100	2	2	2	2	2	2	2.76061	0.424071	1.43851	2.76061	8.74742	14.0274	4.2555	4.8698	4.1812	4.4513	4.467	4.6253	100	100	100	100	100
822704	beta-globin (AA 1-147) [Rattus norvegicus]	K.VVAGVAS*ALAHKYH.-	S140	4.12575	5.0837	55823	P02091		415423		12637	12342480	9.06214e+06	5.44679e+07	6.87681e+06	1.71591e+07	0.00102387	0.166376	0.400768		751.884	751.883	751.883	751.893	751.894	61.63		2	2	2	2	2		6.40155	5.42336	4.36531	18.0931	19.5571		3.8896	4.8257	4.8606	5.0837	4.6784		39.6889	60.6234	61.63	51.6532
825573	beta-globin (AA 1-147) [Rattus norvegicus]	K.VVAGVAS*ALAHKYH.-	S140	4.82446	3.2359	55823	P02091		415423		808.775	ND	2.00303e+06	1.08887e+07	7944.97	ND	808.775	0.183955	7944.97			1502.77	1502.76			32.3426			1	1					13.515	7.01375					3.2359	2.8419					32.3426	25.3608
822045	beta-globin (AA 1-147) [Rattus norvegicus]	R.YFDS*FGDLSSASAIMGNPK.V	S45	0.531894	6.5466	55823	P02091		415423		421217	1.32976e+06	2.10567e+06	4.59913e+06	1.14356e+06	1.08219e+06	0.316763	0.457842	1.05671			1043.95		1043.95	1043.96	30.144			2		2	2			4.91161		7.1877	13.1534			6.4292		6.5466	6.303			27.1827		30.144
822039	beta-globin (AA 1-147) [Rattus norvegicus]	R.YFDSFGDLSSAS*AIMGNPK.V	S53	1.22192	7.6022	55823	P02091		415423	Casn_Kin1 (S53) 0.38%	506215	1.33069e+06	2.12678e+06	4.58855e+06	1.76417e+06	1.07081e+06	0.380414	0.463497	1.6475		1043.96	1043.95	1043.95	1043.95	1043.96	36.0382		2	2	2	2	2		15.9614	3.21052	4.14971	8.94149	14.0926		5.7534	6.7908	7.6022	7.3704	6.364		25.3523	36.0382	31.8699	28.431
824325	beta-globin (AA 1-147) [Rattus norvegicus]	R.YFDSFGDLSSAS*AIMGNPK.V	S53	4.34618	4.0621	55823	P02091		415423	Casn_Kin1 (S53) 0.38%	ND	36951.9	32552.3	ND	76825.4	20683.7	2.70622e-05	32552.3	3.71429					696.302		19.3323					3						4.34618						4.0621						19.3323
825702	beta-globin (AA 1-147) [Rattus norvegicus]	K.FGDLSSAS*AIMGNPQVK.A	S53	4.12359	4.8498	55825	P11517		415574	Casn_Kin1 (S53) 0.38%	12870.6	485153	628507	2.64468e+06	1.10139e+06	402239	0.0265291	0.237649	2.73814				901.419			38.1697				2						6.08825						4.8498						38.1697
825638	beta-globin (AA 1-147) [Rattus norvegicus]	K.VVAGVASALAHKY*H.-	Y146	7.58603	3.1706	55823	P02091		415423		808.775	ND	2.00303e+06	1.08887e+07	7944.97	ND	808.775	0.183955	7944.97			1502.77	1502.76			24.4707			1	1					13.515	7.58603					3.1706	2.4559					22.9971	24.4707
824328	beta-globin (AA 1-147) [Rattus norvegicus]	R.Y*FDSFGDLSSASAIMGNPK.V	Y42	9.78483	4.5049	55823	P02091		415423		ND	36951.9	21754.4	ND	98998	ND	2.70622e-05	21754.4	98998					696.306		14.7739					3						9.78483						4.5049						14.7739
827172	beta-globin [Mus musculus]	K.VVAGVAT*ALGHK.Y	T140	4.78948	3.8607	156257673					1.08618e+07	7.46302e+06	5.04395e+06	39950615	1.62715e+06	3.47366e+07	1.45541	0.126255	0.0468425	601.821	601.824					100	2	2					4.78948	10.2691					3.1207	3.8607					100	100
825794	betaine-homocysteine methyltransferase [Rattus norvegicus]	K.AGAAIVGVNCHFDPS*TSLQTIK.L	S222	5.66747	3.623	2072346	O09171		401432		81417.9	20841.8	678491	678869	422760	133276	3.90648	0.999444	3.17205			789.383	789.384			2.91887			3	3					5.66747	7.06214					3.2447	3.623					2.91887	2.20295
823075	betaine-homocysteine methyltransferase [Rattus norvegicus]	K.HGS*WGSGLDMHTK.P	S330	0.241189	4.6255	2072346	Q93088	4200	401432		1.64249e+06	1.971e+06	1.08708e+06	2.53309e+06	1.51683e+06	4262.77	0.833328	0.429154	355.833	498.207	498.206	498.208	498.208	498.212		53.4379	3	3	3	3	3		1.59453	0.241189	3.24934	3.73842	12.3876		4.5824	4.1211	3.9391	4.202	4.6255		34.17	53.4379	38.0615	20.054	30.6312
823986	betaine-homocysteine methyltransferase [Rattus norvegicus]	K.HGS*WGSGLDMHTKPWIR.A	S330	4.55272	3.6167	2072346	O35490	12069	401432		5.08409e+06	11614.2	ND	1662.83	75598.3	1.33908e+07	437.749	0.000601386	0.00564554						682.315	31.9863						3						4.55272						3.6167
823989	betaine-homocysteine methyltransferase [Rattus norvegicus]	K.HGS*WGSGLDMHTKPWIR.A	S330	2.05386	2.998	2072346	O35490	12069	401432		7414.2	ND	ND	ND	3555.07	1.01541e+06	7414.2	1	0.00350111						1022.97	33.9358						2						2.05386						2.998
827541	betaine-homocysteine methyltransferase [Rattus norvegicus]	K.HGS*WGSGLDMHTK.P	S330	1.50073	3.8787	2072346	Q93088	4200	401432		683618	1.07011e+06	5221.7	80271.1	196432	2063.73	0.638827	0.0650508	95.183	746.808	746.807					51.9529	2	2					2.72677	1.50073					3.8787	3.1807					38.1697	51.9529
827579	betaine-homocysteine methyltransferase [Rattus norvegicus]	K.AGPWT*PEAAVEHPEAVR.Q	T45	3.30544	3.3914	2072346	Q93088	4200	401432		527092	ND	ND	79281.2	5711.3	ND	527092	1.26133e-05	5711.3	632.963						100	3						4.95025						3.3914						100
821854	biliverdin reductase A [Rattus norvegicus]	R.FTAS*PLEEER.F	S154	2.97965	3.3445	16758714	P46844		401653		1.50197e+06	1.28486e+06	2.19987e+06	3.57245e+06	2.72788e+06	390433	1.16897	0.615787	6.9868		629.775		629.773	629.773		44.9354		2		2	2			6.65849		3.07499	2.97965			3.3445		2.4791	3.3129			44.9354		44.6853	44.6853
824739	Bin1 protein [Rattus norvegicus] [MASS=45833]	K.S*PSQSS*LPAVVVETFSATVNGAVEGSTTTGR.L	S301S306	12.7171	7.3472	57921002				GSK3_Kin (S301) 0.75%	ND	ND	ND	ND	ND	90211.8	1	1	1.1085e-05						1066.17	1.65497						3						12.7171						7.3472
822865	binding protein [Rattus norvegicus]	K.YQVQS*QENFEPFMK.A	S11	0.29114	5.5056	56131	P02692		398650	DNA_PK (S11) 0.34% ATM_Kin (S11) 0.4%	482680	1.8434e+06	8.57553e+06	3.39353e+06	2.45151e+07	2.50772e+07	0.261842	2.52702	0.977583	927.9	927.899	927.894	927.895	927.895	927.892	105.676	2	2	2	2	2	2	8.71795	7.67202	2.53938	3.32653	3.59072	0.29114	3.765	4.795	4.8317	4.8357	5.222	5.5056	62.2603	89.5128	84.5098	96.6148	105.676
821831	binding protein [Rattus norvegicus]	K.LTITYGS*K.V	S56	0.0415602	2.9105	56131	P02692		398650		9.91326e+06	3.7074e+07	1.6221e+07	1.04404e+07	3.16639e+07	1.65823e+07	0.267391	1.55368	1.9095	481.735	481.735	481.734	481.734	481.735	481.74	47.7991	2	2	2	2	2	2	2.80531	3.00271	1.3507	1.67279	3.31441	14.3485	2.6858	2.6161	2.5809	2.4379	2.9105	2.4846	44.9354	47.7991	29.8287	11.3033	32.342
822170	binding protein [Rattus norvegicus]	K.LTITYGS*K.V	S56	2.31698	2.3917	56131	P02692		398650		4.72613e+06	1.86933e+07	1.8783e+07	2.21121e+07	6.88461e+07	1.85522e+07	0.252825	0.849444	3.71093	962.463	962.465	962.465	962.462	962.463		42.79	1	1	1	1	1		3.45987	5.87034	5.808	2.504	4.21834		2.3917	2.1497	2.1195	1.871	2.0682		26.1625	27.9961	42.79	24.533	30.0974
826788	BPY2 interacting protein 1 (predicted), isoform CRA_b [Rattus norvegicus] [MASS=102805]	R.ANS*QDSLASR.D	S462	3.42055	3.0849	149036090			405838	DNA_PK (S87) 0.1% ATM_Kin (S87) 0.32%	ND	1.1657e+06	2710.6	148344	12112.5	17466.4	8.57855e-07	0.0182724	0.693471		564.74					45.2534		2						3.42055						3.0849						45.2534
825483	BPY2 interacting protein 1 (predicted), isoform CRA_b [Rattus norvegicus] [MASS=102805]	R.STS*PHDVDLCLVSPCEFSHR.K	S659	1.00288	3.3566	149036090			405838	Clk2_Kin (S285) 0.2%	87945.8	293823	1.51086e+06	ND	ND	113354	0.299315	1.51086e+06	8.82196e-06		808.354	808.344				-0.362122		3	3					12.5586	1.00288					3.3306	3.3566
825738	brahma-related protein 1 [Rattus norvegicus]	R.DSEAGSST*PTTSTR.S	T1390	3.07465	4.2274	22095171			400503		53663	5.04024e+06	531368	876965	64104.2	80969.9	0.0106469	0.605917	0.791704				738.8			19.0849				2						5.14021						4.2274						19.0849
824147	brain-enriched SH3-domain protein [Rattus norvegicus]	K.FVS*FTSR.L	S27	0.140784	2.3614	7689361	Q8N5V2	10442	404534	Akt_Kin (S27) 0.86%	1.26997e+06	1.08923e+07	5.82862e+06	4.26779e+06	2.07865e+06	19189.3	0.116594	1.36572	108.323	462.207	462.207	462.206	462.206	462.208		67.6078	2	2	2	2	2		5.10068	4.76496	1.7977	2.0576	7.74304		2.1142	2.3614	2.1699	2.0951	2.3013		39.7221	67.6078	47.4269	60.386	60.386
822366	branched chain alpha-ketoacid dehydrogenase subunit E1 alpha [Rattus norvegicus]	R.IGHHS*TSDDSSAYR.S	S256*	0.576694	5.6709	27676484	P11178	2009	407036		1.57543e+07	4.39182e+06	3.7007e+06	4.09935e+06	244239	326025	3.58719	0.902753	0.749144	538.219	538.22	538.219	538.219	538.22		22.6067	3	3	3	3	3		2.39359	3.64618	2.39359	1.59986	3.7578		5.3477	5.6709	5.0447	5.0207	4.769		17.7936	17.7936	20.7239	22.6067	10.9255
825596	branched chain alpha-ketoacid dehydrogenase subunit E1 alpha [Rattus norvegicus]	R.IGHHS*TSDDSSAYR.S	S256*	0.967358	4.676	27676484	P11178	2009	407036		3.17341e+06	2.7506e+06	857453	670308	157674	2476.9	1.15371	1.27919	63.6576	806.826	806.826	806.825	806.824			22.4677	2	2	2	2			4.29729	3.23692	2.02773	0.967358			4.676	3.3588	3.7331	4.0379			21.214	22.4677	13.8917	13.8917
823445	branched chain alpha-ketoacid dehydrogenase subunit E1 alpha [Rattus norvegicus]	R.S*VDEVNYWDK.Q	S266*	1.94825	3.722	27676484	P11178	2009	407036		1.40314e+06	5.82646e+06	1.63222e+06	7.01468e+06	828323	9.20207e+06	0.240822	0.232687	0.0900149		667.775	667.77	667.771		667.778	98.7295		2	2	2		2		10.1833	1.94825	3.59676		13.75		3.4068	3.5896	2.6928		3.722		80.6227	74.8531	80.3482
825533	branched chain alpha-ketoacid dehydrogenase subunit E1 alpha [Rattus norvegicus]	R.S*VDEVNYWDKQDHPISR.L	S266*	1.58676	3.4749	27676484	P11178	2009	407036		2.03928e+06	8.7593e+06	3.42243e+07	6.25797e+07	755993	4.77271e+07	0.232813	0.546891	0.0158399	723.319	723.326	723.321	723.322			58.9005	3	3	3	3			1.58676	9.34056	1.82661	3.0259			3.3581	2.9133	3.4749	3.4359			51.8084	46.1033	46.682	58.9005
827749	branched chain alpha-ketoacid dehydrogenase subunit E1 alpha [Rattus norvegicus]	R.S*VDEVNYWDK.Q	S266*	3.01229	2.8943	27676484	P11178	2009	407036		825462	1.58332e+06	1.12954e+06	4.77497e+06	519601	2.02387e+06	0.52135	0.236555	0.256737				1334.54			78.7781				1						5.2078						2.8943						78.7781
826074	branched chain alpha-ketoacid dehydrogenase subunit E1 alpha [Rattus norvegicus]	R.IGHHST*SDDSSAYR.S	T257*	3.61518	3.7079	27676484	P11178	2009	407036		1.51917e+07	2.7506e+06	857453	852232	164189	ND	5.52306	1.00613	164189	806.826	806.828					22.4677	2	2					3.61518	5.58088					3.3421	3.7079					22.4677	13.6173
827233	branched chain alpha-ketoacid dehydrogenase subunit E1 alpha [Rattus norvegicus]	R.IGHHST*SDDSSAYR.S	T257*	2.73464	4.6203	27676484	P11178	2009	407036		230126	176414	3.68795e+06	4.10283e+06	244239	3340	1.30447	0.898881	73.1256	538.222	538.219		538.219			13.9358	3	3		3			8.07366	2.73464		2.84626			4.6203	4.2825		4.4911			13.9358	13.9358		4.58638
822484	branched-chain alpha-ketoacid dehydrogenase kinase [Rattus norvegicus] [MASS=43364]	R.S*TSATDTHHVELAR.E	S1*	1.46444	3.4729	924921	O55028		406331		5.05908e+06	1.20323e+07	6.12208e+06	1.15299e+07	8.01798e+06	1.55706e+07	0.420458	0.530976	0.514945	802.859			802.858	802.862	802.862	15.7344	2			2	2	2	2.60483			1.99413	6.5619	6.02599	3.1404			3.2195	3.1379	3.4729	14.7712			8.23909	15.2288
822393	branched-chain alpha-ketoacid dehydrogenase kinase [Rattus norvegicus] [MASS=43364]	R.STS*ATDTHHVELAR.E	S3*	1.08431	4.249	924921	O55028		406331	Akt_Kin (S33) 0.05% 1433_m1 (S33) 0.34% Clk2_Kin (S33) 0.4%	5.06922e+06	1.20323e+07	6.12208e+06	1.15299e+07	1.41304e+07	1.55467e+07	0.421301	0.530976	0.908901	802.863	802.86	802.86	802.859	802.863	802.867	7.90838	2	2	2	2	2	2	7.32216	3.67044	3.67044	2.8354	8.00763	13.1798	4.249	3.0745	3.6104	2.8977	3.3523	3.3589	4.58638	7.90838
825617	branched-chain alpha-ketoacid dehydrogenase kinase [Rattus norvegicus] [MASS=43364]	R.ST*SATDTHHVELAR.E	T2*	1.53922	3.1668	924921	O55028		406331		5.06922e+06	1.20323e+07	6.12208e+06	1.15299e+07	1.41297e+07	1.55467e+07	0.421301	0.530976	0.908856	802.861	802.858		802.859			-0.222764	2	2		2			5.26573	1.53922		2.14992			3.1668	2.5583		2.8718
827663	breakpoint cluster region (predicted) [Rattus norvegicus] [MASS=140996]	R.HQDGLPYIDDS*PSSSPHLSSK.G	S442*	2.76946	4.899	149043782	P11274	1044	395878	GSK3_Kin (S459) 0.56%	133499	225438	410233	51828.4	272.433	30151.5	0.592175	7.91521	0.00903549	783.015						27.8076	3						2.76946						4.899						27.8076
823038	Brefeldin A-inhibited guanine nucleotide-exchange factor 2 [Rattus norvegicus] [MASS=201973]	R.HLDVDLDRQS*LSSIDR.N	S1518	0.0513107	3.5102	31126988			399191		1.48944e+06	1.14638e+06	963860	719414	1.13739e+07	1.72828e+06	1.29925	1.33979	6.58108	650.313	650.308	650.312	650.31	650.316	650.322	21.741	3	3	3	3	3	3	6.06488	1.26224	4.92067	1.84205	11.1394	19.8722	3.0119	2.9219	3.5102	3.4557	3.0683	2.8334	11.1454	21.741	17.5473	11.2671	13.1326
827565	Brefeldin A-inhibited guanine nucleotide-exchange factor 2 [Rattus norvegicus] [MASS=201973]	R.HLDVDLDRQS*LSSIDR.N	S1518	5.32089	3.9635	31126988			399191		336047	234828	6239.55	22956.2	748503	ND	1.43104	0.271803	748503	974.968	974.968					44.6853	2	2					7.88639	8.82536					3.8199	3.9635					17.7936	44.6853
825887	Brefeldin A-inhibited guanine nucleotide-exchange factor 2 [Rattus norvegicus] [MASS=201973]	R.HLDVDLDRQS*LSS*IDR.N	S1518S1521	3.13473	4.1415	31126988			399191		83986.1	431628	458620	1.12827e+06	3.33669e+06	42863	0.19458	0.406483	77.8455		676.967	676.967	676.968			12.6621		3	3	3				3.58818	3.13473	4.67251				4.1415	4.1265	3.4132				5.99739	12.6621	12.5672
825510	Brefeldin A-inhibited guanine nucleotide-exchange factor 2 [Rattus norvegicus] [MASS=201973]	R.HLDVDLDRQSLS*SIDR.N	S1520	3.05811	3.3336	31126988			399191		ND	ND	ND	ND	ND	ND	1	1	1			650.311				10.9255			3						3.05811						3.3336						10.9255
823950	Brefeldin A-inhibited guanine nucleotide-exchange factor 2 [Rattus norvegicus] [MASS=201973]	R.HLDVDLDRQSLSS*IDR.N	S1521	0.708087	3.9613	31126988			399191		574199	2.8682e+06	961436	406678	243421	1.67368e+06	0.200195	2.36412	0.145441		650.312	650.311			650.309	13.9358		3	3			3		4.5615	3.15047			0.708087		3.3309	3.6577			3.9613		13.9358	10.8814
822691	Brefeldin A-inhibited guanine nucleotide-exchange factor 2 [Rattus norvegicus] [MASS=201973]	R.ELEKPIQSKPQS*PVIQATAGS*PK.F	S218S227	0.223656	5.4283	31126988			399191	p38_Kin (S218) 0.31%	6.01024e+06	3.3397e+06	7.29003e+06	1.05373e+07	3.42624e+06	903898	1.79964	0.691831	3.79052		865.096	865.098	865.098	865.102	865.106	42.3033		3	3	3	3	3		2.33296	4.44996	4.46539	9.25465	13.4192		4.0516	5.4283	4.8874	5.3256	4.9217		27.7516	42.2417	27.8762	42.3033
822155	Brefeldin A-inhibited guanine nucleotide-exchange factor 2 [Rattus norvegicus] [MASS=201973]	K.PQSPVIQATAGS*PK.F	S227	0.273839	5.1433	31126988			399191		1.61893e+07	1.70155e+07	7.1848e+06	5.45544e+06	6.2082e+06	9.19734e+06	0.951442	1.317	0.674999	730.861	730.866	730.863	730.865	730.865	730.872	90.579	2	2	2	2	2	2	0.527139	7.1266	2.533	5.4562	5.0386	15.4853	5.0856	5.1433	5.1165	5.0723	5.0716	4.8988	82.8127	90.579	82.8127	90.579	90.579
822427	Brefeldin A-inhibited guanine nucleotide-exchange factor 2 [Rattus norvegicus] [MASS=201973]	R.ELEKPIQSKPQSPVIQATAGS*PK.F	S227	0.0835555	5.8883	31126988			399191		2.78447e+07	1.57378e+07	1.76266e+07	3.33838e+07	1.17962e+07	1.07172e+07	1.76929	0.527999	1.10068	838.441	838.443	838.438	838.44	838.454	838.45	43.2622	3	3	3	3	3	3	2.75732	5.13664	0.0835555	1.9536	18.0556	13.3209	5.411	5.0125	5.7608	5.67	5.8883	5.1103	35.3529	40.1748	37.4273	40.1748	34.9475
824856	Brefeldin A-inhibited guanine nucleotide-exchange factor 2 [Rattus norvegicus] [MASS=201973]	R.QSLSS*ADNLEPDAQGHPVAAR.F	S356	1.85911	3.6218	31126988			399191		2.84467e+06	298272	1.12305e+06	555220	1.17153e+06	796243	9.53717	2.02272	1.47133	748.346		748.344	748.343			19.2768	3		3	3			5.87154		3.17876	1.85911			3.6218		3.4045	3.1491			14.9152		19.2768
824355	Brefeldin A-inhibited guanine nucleotide-exchange factor 2 [Rattus norvegicus] [MASS=201973]	R.ELEKPIQSKPQSPVIQAT*AGSPK.F	T224	1.73477	4.5789	31126988			399191		2.7888e+07	1.58318e+07	1.76393e+07	3.33914e+07	1.19018e+07	80695.7	1.76152	0.528258	147.49	838.446		838.44	838.441	838.447		9.03271	3		3	3	3		8.65786		1.73477	2.74936	10.0425		4.5392		4.383	3.9251	4.5789		9.03271		7.92548
822144	bromodomain containing 3 (predicted), isoform CRA_a [Rattus norvegicus] [MASS=81408]	R.SES*PPPLSEPK.Q	S263*	0.0561097	3.7225	149039214	Q8K2F0		398728	1433_m1 (S262) 0.34% Erk1_Kin (S262) 0.57%	1.9161e+08	6.61087e+07	5.85482e+07	3.60152e+07	2.56377e+07	7.0022e+07	2.89841	1.62565	0.366138	624.284	624.284	624.283	624.282	624.288	624.289	45.2895	2	2	2	2	2	2	3.87156	3.3826	2.10812	1.03402	11.2138	11.5985	3.7225	3.3631	3.46	3.1686	3.091	3.3063	45.2895	35.8493	41.4063	45.2895	35.1415
823219	bromodomain-containing 2 [Rattus norvegicus]	R.KADTTTPTPTAILAPGS*PAS*PPGSLEPK.A	S297S300*	2.187	6.0816	46237556	P25440	3326	395369	p38_Kin (S251) 0.06% p38_Kin (S254) 0.13% GSK3_Kin (S254) 0.22% Erk1_Kin (S254) 0.54% Cdc2_Kin (S254) 0.76% Erk1_Kin (S251) 0.76%	6.64399e+06	1.91146e+06	8.13368e+06	8.11502e+06	804750	1.88756e+06	3.47587	1.0023	0.426344	954.8	954.806	954.799	954.793	954.799		41.6991	3	3	3	3	3		9.30693	15.9446	8.25886	2.187	9.09731		6.0816	5.1125	5.0293	5.3021	4.6755		41.6991	38.0784	39.0536	31.2346	29.7938
826222	bromodomain-containing 2 [Rattus norvegicus]	R.KADTTTPTPTAILAPGS*PASPPGS*LEPK.A	S297S304*	2.31976	4.7585	46237556	P25440	3326	395369	p38_Kin (S251) 0.06% Erk1_Kin (S251) 0.76%	6.64399e+06	1.91146e+06	8.13368e+06	8.11502e+06	1.3715e+06	2344300	3.47587	1.0023	0.585036	954.801		954.793				18.639	3		3				10.8231		2.31976				4.229		4.7585				15.4231		18.639
824671	BTB and CNC homology 1 (predicted), isoform CRA_b [Rattus norvegicus] [MASS=81543]	R.ISES*PEPGQR.T	S448*	1.8991	4.0811	149059763	O14867	4127	396036		7.79209e+06	7.5545e+06	2.384e+06	1.10029e+06	432098	1.22097e+06	1.03145	2.1667	0.353898			590.257	590.257		590.263	39.2689			2	2		2			1.8991	2.40779		12.344			2.6435	3.2673		4.0811			13.9358	17.7936
822630	BUD13 homolog (yeast) [Rattus norvegicus] [MASS=71869]	R.HDTPDPS*PPR.R	S161	0.32541	3.4447	67678288			405771		2.08877e+06	2.94773e+06	9.36317e+07	6.36416e+07	1.67205e+06	34372.8	0.708602	1.47124	48.6445	599.75	599.749			599.752		62.2536	2	2			2		2.72843	1.20151			7.31749		3.262	2.9507			3.4447		62.2536	49.1569			62.2536
823072	BUD13 homolog (yeast) [Rattus norvegicus] [MASS=71869]	R.ARHDS*PDLELPK.A	S296	3.27232	4.0518	67678288			405771		172715	462716	868549	852138	720185	1.19565e+06	0.373263	1.01926	0.602337			486.566		486.567		100			3		3				3.90345		4.84329				3.7992		4.0518				100		100
823923	BUD13 homolog (yeast) [Rattus norvegicus] [MASS=71869]	R.HDS*PDLELPK.A	S296	0.0975181	3.9129	67678288			405771		3.54998e+06	4.33539e+06	3.16587e+06	1.70987e+06	393981	275826	0.818838	1.85153	1.42837	615.776	615.777	615.773	615.77	615.786	615.776	100	2	2	2	2	2	2	3.07181	5.94857	0.495717	6.05429	19.1457	4.2664	3.8313	3.8036	3.9129	3.6083	2.4249	3.4805	100	100	100	100	100
826295	BUD13 homolog (yeast) [Rattus norvegicus] [MASS=71869]	R.HGT*PEPS*PPR.R	T144S148	1.70924	3.33	67678288			405771		719999	38374.2	7288.27	5195.75	539467	1603.8	18.7626	1.40274	336.368	617.737						100	2						1.70924						3.33						100
824474	BUD13 homolog (yeast) [Rattus norvegicus] [MASS=71869]	R.VRHDT*PDPS*PPR.R	T157S161	0.195615	3.8545	67678288			405771		1.00656e+06	799923	1.3407e+06	1.09504e+06	2.06019e+06	960661	1.25832	1.22434	2.14456	511.883			511.88	511.882		100	3			3	3		6.40961			0.280382	5.20985		2.9178			3.8545	3.2886		100			100	100
826296	BUD13 homolog (yeast) [Rattus norvegicus] [MASS=71869]	R.HDT*PDPS*PPR.R	T157S161	1.87726	3.6257	67678288			405771		2.53666e+06	459317	10436.5	7285.18	453294	7772.83	5.52268	1.43256	58.3178	639.733						100	2						3.40253						3.6257						100
823629	bystin-like [Rattus norvegicus] [MASS=50027]	R.LGPGVPQDGS*DEEDEEWPTLEK.A	S97	0.0997188	4.2896	149069448					2.72383e+06	1332322	7.97289e+06	5.97516e+06	631183	2.49526e+06	2.04442	1.33434	0.252953	1254.02	1254.02	1254.04	1254.04		1254.03	170.02	2	2	2	2		2	3.49017	7.47897	7.44296	8.4162		3.93688	3.8148	3.7082	4.2896	3.5447		4.0355	150.243	127.533	170.02	168.441
823682	bystin-like [Rattus norvegicus] [MASS=50027]	R.LGPGVPQDGS*DEEDEEWPTLEK.A	S97	1.49578	4.563	149069448					3.46566e+06	2.03932e+06	8.48793e+06	5.29581e+06	695759	1.70442e+06	1.69942	1.60276	0.408209	836.361	836.364		836.359		836.356	117.696	3	3		3		3	7.48683	10.9171		5.22125		1.49578	3.8976	4.5587		3.5752		4.563	117.696	98.2912		57.6345
824707	C3G protein [Rattus norvegicus]	R.AVS*GSSLPVGINR.Q	S203	0.441398	4.3807	6119709			403094		4.39403e+06	1.89421e+06	2.28688e+06	825466	524897	968889	2.31972	2.77041	0.541751	668.838		668.837	668.836		668.844	44.6853	2		2	2		2	5.37156		2.90274	1.90025		14.0422	3.6605		4.0364	4.0612		4.3807	35.3857		26.0224	44.6853
827608	C3G protein [Rattus norvegicus]	K.LSRS*DEQLSSLDR.D	S252	2.04323	3.7525	6119709			403094		1.79931e+06	6.05981e+06	2.03041e+06	16853.9	597	1.03166e+06	0.296925	120.471	0.000578679	793.367	793.366					28.945	2	2					2.8252	2.04323					3.3507	3.7525					28.945	25.2895
824768	C3G protein [Rattus norvegicus]	R.S*DEQLSSLDR.D	S252*	0.805202	3.3499	6119709	Q13905	2627	403094		97803.4	393880	114006	270022	243549	9061.9	0.248308	0.422209	26.8761			615.256			615.268	38.7451			2			2			0.805202			19.7718			2.7128			3.3499			21.9372
826175	CaBP1 [Rattus norvegicus]	R.EPWDGKDGELPVEDDIDLS*DVELDDLEKDEL.-	S419*	1.3333	7.0629	488838	Q922R8				254571	9707.3	29606.3	28962.5	ND	13853.7	26.2247	1.02223	7.21829e-05	1208.21						100	3						15.2817						7.0629						100
824526	cactin [Rattus norvegicus] [MASS=89296]	R.S*PGVAALAASQQQSLQER.L	S142	2.0511	5.8128	62866955					1.26585e+06	1.45808e+06	483482	264601	128820	1.10805e+06	0.868166	1.82721	0.116258			960.966	960.965		960.976	103.456			2	2		2			3.5764	3.13391		14.066			5.6716	5.2696		5.8128			103.456	67.0435
827705	CAK beta (cell adhesion kinase beta) [Rattus norvegicus]	K.RNS*LPQIPTLNLESR.R	S375*	11.9475	3.2835	1000680	P70600		408320	PKA_Kin (S375) 0.36%	3681.05	770309	733288	ND	416.767	385069	0.00477867	733288	0.00108232		909.478					52.8794		2						12.1346						3.2835						52.8794
822263	Calcium binding protein [Rattus norvegicus]	R.AQRLS*QETEALGR.S	S368*	3.07395	3.5052	871525	Q02818	3205	407221	ATM_Kin (S368) 0.18%	1.43815e+06	2.06675e+06	136602	77106.1	882378	253795	0.695852	1.77161	3.47674	769.874	769.877			769.881		32.2792	2	2			2		5.05608	9.33877			14.0958		2.5815	2.9556			3.5052		32.2792	28.396			25.3523
825486	Calcium binding protein [Rattus norvegicus]	K.SGKLS*QELDFVSHNVR.T	S85	1.04963	5.1228	871525	Q02819		407221	ATM_Kin (S85) 0.85%	242973	135874	1.75459e+06	990703	ND	9732.87	1.78822	1.77106	0.000102745	632.64	632.64	632.64				61.9958	3	3	3				2.04652	1.62983	2.04652				4.9314	3.7478	5.1228				61.9958	35.4867	29.4661
827688	Calcium binding protein [Rattus norvegicus]	K.SGKLS*QELDFVSHNVR.T	S85	2.57397	3.9394	871525	Q02819		407221	ATM_Kin (S85) 0.85%	110086	105705	124576	2197.85	634.2	141724	1.04144	56.681	0.00447488	948.457						45.0249	2						2.7322						3.9394						45.0249
822508	calcium-regulated heat stable protein CRHSP-24 [Rattus sp.]	K.HETWSGHVIS*S.-	S146	0.295557	3.9591	4583309	Q9Y2V2	8515	396538		4.41287e+06	4.6184e+06	3.522e+06	5.39819e+06	3.11628e+06	6.2282e+06	0.955496	0.65244	0.500349	660.279	660.278	660.274	660.276	660.279	660.284	89.8708	2	2	2	2	2	2	7.35856	5.69134	0.462282	2.08405	6.43401	14.573	3.7346	3.3956	3.7147	2.7213	3.6437	3.9591	75.823	89.8708	60.4958		60.2649
824935	calcium-regulated heat stable protein CRHSP-24 [Rattus sp.]	K.HETWSGHVISS*.-	S147	0.318292	3.8903	4583309	Q9Y2V2	8515	396538		4.41287e+06	2.89438e+06	3.522e+06	5.35597e+06	3.8621e+06	6.33818e+06	1.52463	0.657583	0.609338		660.278	660.274	660.276			15.0965		2	2	2				5.97174	0.318292	1.80365				3.201	3.8903	2.657				11.2338	9.54243	15.0965
823819	calcium-regulated heat stable protein CRHSP-24 [Rattus sp.]	R.DRS*PSPLR.G	S30	0.655108	2.7139	4583309	Q9CR86		396538	Akt_Kin (S30) 0.25% Clk2_Kin (S30) 0.74%	3.80097e+06	1.30809e+07	4.5585e+07	9.46855e+07	4.63408e+06	3.30383e+06	0.290574	0.481436	1.40264	504.237	504.239	504.238	504.238	504.24	504.24	32.342	2	2	2	2	2	2	0.655108	3.01746	2.41198	2.29287	6.35253	5.20114	2.6826	2.641	2.6874	2.7139	2.6378	2.691	26.0224	32.342	27.6809	17.7936	26.0224
822455	calcium-regulated heat stable protein CRHSP-24 [Rattus sp.]	R.DRS*PS*PLRGNVVPSPLPTR.R	S30S32	0.131516	5.6942	4583309	Q9CR86		396538	Akt_Kin (S30) 0.25% Clk2_Kin (S30) 0.74% Akt_Kin (S32) 0.77%	2.69597e+07	5.79177e+07	1.06995e+08	1.7253e+08	1.17053e+08	3.24682e+08	0.465484	0.620156	0.360515	735.698	735.694	735.693	735.694	735.699	735.696	148.108	3	3	3	3	3	3	9.20149	4.66652	2.85252	3.75952	11.1833	7.44646	4.7184	5.5168	5.6323	5.6942	5.3938	4.8419	122.999	148.108	142.324	135.018	140.126
826331	calcium-regulated heat stable protein CRHSP-24 [Rattus sp.]	R.DRS*PS*PLR.G	S30S32	1.76562	3.4035	4583309	Q9CR86		396538	Akt_Kin (S30) 0.25% Clk2_Kin (S30) 0.74% Akt_Kin (S32) 0.77%	854567	2.31283e+07	19000	215912	190990	8436.6	0.036949	0.0879987	22.6382	544.222	544.222					100	2	2					2.77717	2.54728					3.4035	2.9621					100	100
822546	calcium-regulated heat stable protein CRHSP-24 [Rattus sp.]	R.DRS*PS*PLRGNVVPS*PLPTR.R	S30S32S41	0.0700211	6.1794	4583309	Q9CR86		396538	Akt_Kin (S30) 0.25% Clk2_Kin (S30) 0.74% Akt_Kin (S32) 0.77% p38_Kin (S41) 0.86%	4.36789e+07	1.03269e+08	1.14495e+08	6.42683e+06	65105810	3.95245e+07	0.422963	17.8151	1.64723	762.35	762.351	762.349	762.346	762.356	762.349	126.269	3	3	3	3	3	3	5.23405	5.68043	3.99994	0.0700211	13.1332	3.59732	6.029	6.013	5.9557	6.1794	5.5716	5.4575	113.22	112.101	126.269	113.735	79.3107
823489	calcium-regulated heat stable protein CRHSP-24 [Rattus sp.]	R.DRS*PS*PLRGNVVPS*PLPTR.R	S30S32S41	1.57547	5.0558	4583309	Q9CR86		396538	Akt_Kin (S30) 0.25% Clk2_Kin (S30) 0.74% Akt_Kin (S32) 0.77% p38_Kin (S41) 0.86%	6.08815e+06	2.06529e+07	1.9717e+07	485577	2.57045e+07	9.24838e+06	0.294784	40.6052	2.77935	1143.03	1143.02	1143.02	1143.02	1143.03	1143.03	99.5775	2	2	2	2	2	2	10.5468	7.44844	6.06117	1.57547	10.8707	14.713	4.6507	4.7528	4.7919	4.6559	5.0558	4.6208	99.5775	95.2362	95.2905	91.8069	97.3856
822712	calcium-regulated heat stable protein CRHSP-24 [Rattus sp.]	R.DRSPS*PLRGNVVPSPLPTR.R	S32	0.291752	3.6732	4583309	Q9CR86		396538	Akt_Kin (S32) 0.77%	24311.8	3.51027e+06	3.37191e+06	1.29935e+07	6.1575e+06	7.70131e+06	0.00692592	0.259507	0.799539		709.039	709.036	709.036	709.046	709.042	60.4427		3	3	3	3	3		4.78095	0.291752	0.72938	14.5168	10.1218		3.6501	3.6732	3.5314	3.4501	2.9947		52.0794	48.3605	43.9377	60.4427
825868	calcium-regulated heat stable protein CRHSP-24 [Rattus sp.]	R.DRSPS*PLR.G	S32	2.35243	2.3483	4583309	Q9CR86		396538	Akt_Kin (S32) 0.77%	2.21131e+06	1.88031e+06	4.5585e+07	9.46855e+07	4.34051e+06	2.70514e+06	1.17604	0.481436	1.60454			504.238	504.238			10.8814			2	2					2.35243	2.47154					2.2861	2.3483					10.1889	10.8814
822713	calcium-regulated heat stable protein CRHSP-24 [Rattus sp.]	R.DRSPS*PLRGNVVPS*PLPTR.R	S32S41	4.29012	4.5921	4583309	Q9CR86		396538	Akt_Kin (S32) 0.77% p38_Kin (S41) 0.86%	3102.45	1.73762e+06	3.25346e+06	4.10854e+06	3.5789e+06	5.96644e+06	0.00178546	0.791877	0.599839		735.697	735.695	735.694	735.703	735.7	44.8521		3	3	3	3	3		8.2945	6.19935	4.70734	15.9993	11.9315		4.2788	4.0559	3.7567	4.5921	4.3217		44.8521	31.2125	28.426	40.4233
821858	calcium-regulated heat stable protein CRHSP-24 [Rattus sp.]	R.GNVVPS*PLPTR.R	S41*	0.304124	2.9764	4583309	Q9Y2V2	8515	396538	p38_Kin (S41) 0.86%	1.75864e+08	7.75926e+07	3.949e+07	4.59742e+07	1.526e+08	5.8191e+07	2.26651	0.85896	2.6224	608.808	608.81	608.809	608.81	608.809	608.811	45.8164	2	2	2	2	2	2	0.706883	2.61382	1.41376	3.21384	1.31513	5.22762	2.4847	2.5278	2.6164	2.3037	2.7878	2.9764	27.8076	41.935	45.8164	41.935	36.7575
822811	calcium-regulated heat stable protein CRHSP-24 [Rattus sp.]	R.GNVVPS*PLPTRR.T	S41*	0.961601	2.7491	4583309	Q9Y2V2	8515	396538	p38_Kin (S41) 0.86%	1.95082e+07	2.23301e+08	9.5894e+07	5.16664e+08	3.69828e+06	1729650288	0.0873628	0.185602	0.00213817	686.861	686.861	686.861	686.86	686.866	686.864	58.0006	2	2	2	2	2	2	4.24706	3.62785	4.07222	1.85035	10.2934	7.89673	2.7491	2.2206	2.2157	2.4432	2.3183	2.4955	33.224	29.3481	32.7581	25.4411	58.0006
821777	calcium-regulated heat stable protein CRHSP-24 [Rattus sp.]	R.TFS*ATVR.A	S52*	0.0348276	2.626	4583309	Q9Y2V2	8515	396538	Akt_Kin (S52) 0.02% Clk2_Kin (S52) 0.55%	5.80039e+08	7.28285e+08	3.45146e+08	4.3349e+08	4.70909e+08	2.59918e+07	0.796445	0.796202	18.1176	431.198	431.198	431.197	431.198	431.203	431.199	42.4279	2	2	2	2	2	2	2.01999	2.6585	0.742988	2.31022	14.7086	5.2125	2.5607	2.626	2.2531	2.4084	2.3991	2.3958	42.4279	40.192	40.192	38.1697	42.4279
822744	caldesmon 1 [Rattus norvegicus]	R.SGGRAS*GDKEAEGAPQVEAGK.R	S258	1.06683	4.9333	6978589	Q62736		400783		1.75589e+06	1.94484e+06	456141	508399	1.02125e+06	2.08447e+06	0.902843	0.897211	0.489932	694.315				694.324	694.32	24.5876	3				3	3	1.06683				13.5611	6.95838	4.2362				4.9333	4.7064	6.56124				14.2513
827043	calnexin [Rattus sp.]	K.AEEDEILNRS*PR.N	S582*	3.67871	2.7409	310085	P24643	252	411640	Cdc2_Kin (S583) 0.23% Cdk5_Kin (S583) 0.24%	ND	1.37621e+07	6507.55	ND	623082	ND	7.26634e-08	6507.55	623082		503.565					100		3						3.67871						2.7409						100
825006	calpastatin [Rattus norvegicus]	K.NTEKPGQDQDPIDALS*EDLDSCPPTTETSQNTTK.E	S560	0.31212	6.1176	2765338			401165		2605.57	58950.6	3.20619e+06	31753.3	ND	16412.4	0.0441993	100.972	6.09295e-05			1271.55	1271.54			89.8221			3	3					2.93497	3.62218					6.1176	4.6898					89.8221	83.4575
824589	calpastatin [Rattus rattus]	R.S*NEQIVSEK.S	S63	0.314329	2.8955	57531	P27321		401165		1.06336e+06	1.51079e+06	682958	2.30838e+06	42516.4	1.20287e+06	0.703845	0.295861	0.0353457			557.245	557.247		557.249	109.903			2	2		2			0.862159	4.70593		7.22054			2.2131	2.8955		2.111			100.972	109.903
826369	calpastatin [Rattus rattus]	R.S*NEQIVSEK.S	S63	3.23309	2.7063	57531	P27321		401165		2.89316e+06	4.97456e+06	39018.1	423875	223637	433077	0.581591	0.092051	0.516391	1113.49	1113.49					84.8837	1	1					8.4958	3.34086					2.7063	2.6332					68.3237	84.8837
821976	calpastatin [Rattus rattus]	K.SLT*PTLPMESTLNK.L	T114	3.78464	3.5694	57531	P27321		401165	Cam_Kin2 (T114) 0.77%	776423	2.88628e+06	442252	1.35041e+06	4.2533e+06	3.26817e+06	0.269004	0.327496	1.30143	806.394	806.395			806.393	806.404	18.1954	2	2			2	2	6.58899	8.09662			6.05542	19.2331	3.5694	3.0245			3.1739	2.8485	18.1954	3.95204			9.88273
825543	calpastatin/CANP inhibitor [Rattus sp.]	K.NEAITGPLPDS*PKPMGIDHAIDALSSDFTCSSPTGK.Q	S150	2.3905	6.0982	57784	P27321		401165	Erk1_Kin (S150) 0.81%	ND	3087.85	791592	ND	119.067	1797.97	0.00032385	791592	0.066223			1269.58				72.1541			3						2.3905						6.0982						72.1541
825036	calpastatin/CANP inhibitor [Rattus sp.]	R.DKELDDALDELS*DSLGQR.Q	S470	1.13868	5.1415	57784	P51125		401165		69814.6	52661.8	670627	ND	317.067	397505	1.32571	670627	0.000797642	700.314	700.308	700.313				42.2669	3	3	3				4.95015	3.30171	2.71568				4.5764	5.1415	4.7272				19.3323	23.9245	42.2669
825447	calpastatin/CANP inhibitor [Rattus sp.]	R.DKELDDALDELS*DSLGQR.Q	S470	1.2435	5.7983	57784	P51125		401165		30180.5	19073.6	192180	1793.8	898.133	90638.4	1.58232	107.136	0.00990897	1049.96	1049.96	1049.97				44.6853	2	2	2				1.2435	1.61512	2.98725				4.716	5.7983	5.523				27.6809	27.6042	44.6853
827690	calpastatin/CANP inhibitor [Rattus sp.]	R.DKELDDALDELSDS*LGQR.Q	S472	4.72146	5.1314	57784	P51125		401165		69593.6	52661.8	12037.2	ND	257.7	10011.3	1.32152	12037.2	0.025741	700.314						4.77121	3						4.72146						5.1314						4.77121
825747	cAMP-dependent protein kinase subunit C alpha [Rattus rattus]	R.T*WTLCGTPEYLAPEIILSK.G	T196*	1.27635	5.3207	56912	P05131	1482	413055	PKC_delta (T196) 0.33% Akt_Kin (T196) 0.8%	2.75971e+06	314531	1.92928e+06	2.22386e+06	6.20302e+06	101648	8.77405	0.867534	61.0248	758.043	758.04	758.039	758.042			45.7534	3	3	3	3			7.19154	3.91707	2.83878	5.902			5.3207	4.3282	4.4225	5.0031			45.7534	42.0642	41.2971	23.395
826300	cAMP-dependent protein kinase subunit C alpha [Rattus rattus]	R.T*WTLCGTPEYLAPEIILSK.G	T196*	4.56404	4.8994	56912	P05131	1482	413055	PKC_delta (T196) 0.33% Akt_Kin (T196) 0.8%	2.11782e+07	3.44397e+06	1.1303e+07	5.15987e+06	1.67472e+07	322859	6.14936	2.19055	51.8715	1136.56		1136.56	1136.56			38.7451	2		2	2			10.0787		4.79731	4.56404			4.7898		4.1561	4.8994			12.2185		38.7451	8.53872
822057	cAMP-dependent protein kinase subunit C alpha [Rattus rattus]	R.TWT*LCGTPEYLAPEIILSK.G	T198*	1.14432	5.7955	56912	P05131	1482	413055	Akt_Kin (T198) 0.2%	2.75971e+06	366332	1.69746e+06	4.97411e+06	8.59815e+06	844923	7.53335	0.341259	10.1762	758.046	758.043	758.041	758.04	758.041	758.049	60.4006	3	3	3	3	3	3	12.024	7.0287	5.58072	3.48135	5.09659	15.3292	5.5693	5.7955	5.0327	5.0062	5.7813	4.6659	37.9197	60.4006	43.5022	42.7324	12.1307
822058	cAMP-dependent protein kinase subunit C alpha [Rattus rattus]	R.TWT*LCGTPEYLAPEIILSK.G	T198*	1.55363	6.0922	56912	P05131	1482	413055	Akt_Kin (T198) 0.2%	2.11782e+07	3.23185e+06	1.1303e+07	1.62745e+07	2.61085e+07	4.13317e+06	6.55295	0.694518	6.31684	1136.56	1136.56	1136.56	1136.55	1136.56	1136.56	-0.222764	2	2	2	2	2	2	10.2591	11.1174	7.89573	2.41626	5.5323	9.40092	6.0922	5.5502	5.9531	5.8841	5.5164	5.3598
823256	cAMP-dependent protein kinase subunit C alpha [Rattus rattus]	R.TWTLCGT*PEYLAPEIILSK.G	T202*	3.6442	4.8783	56912	P05131	1482	413055		1.4031e+06	306226	1.89295e+06	4.97411e+06	3.3e+06	846131	4.58193	0.38056	3.90011	758.046	758.047	758.04		758.047		0.204588	3	3	3		3		10.9765	12.9922	3.6442		12.3497		4.8783	3.5699	3.9381		3.3559			0.204588
822710	cAMP-dependent protein kinase type II-alpha regulatory chain [Rattus norvegicus]	R.RVS*VCAETFNPDEEEDNDPR.V	S97*	0.21147	6.4857	22506905	P12368		406835	PKA_Kin (S66) 0.07%	3.54446e+06	1.28396e+07	1.50554e+07	3.36412e+07	2.24451e+07	1.43842e+07	0.276057	0.447527	1.5604	820.338	820.341	820.336	820.332	820.34	820.336	51.8477	3	3	3	3	3	3	6.63278	11.1061	5.37618	0.21147	9.39404	4.63198	4.9813	5.833	6.4121	6.2259	6.4857	5.8582	27.9338	36.9356	51.8477	44.1885	36.0634
823539	cAMP-dependent protein kinase type II-alpha regulatory chain [Rattus norvegicus]	R.RVS*VCAETFNPDEEEDNDPR.V	S97*	0.0813345	5.723	22506905	P12368		406835	PKA_Kin (S66) 0.07%	978263	5.6711e+06	8.40538e+06	1.51283e+07	8.10455e+06	7.40955e+06	0.1725	0.555608	1.0938	1230.01	1230.01	1230	1230	1229.98	1229.99	102.926	2	2	2	2	2	2	16.3927	13.3224	4.78651	2.10249	9.21528	0.0813345	4.8739	4.8203	4.3444	5.723	3.3536	4.3919	88.8668	86.797	101.229	102.926	90.3771
826575	cAMP-dependent protein kinase type II-alpha regulatory chain [Rattus norvegicus]	R.RVSVCAET*FNPDEEEDNDPR.V	T102*	5.00611	5.2842	22506905	P12368		406835		3.31102e+06	190249	72983.4	537111	132971	543411	17.4036	0.135881	0.244696	820.341						8.81908	3						11.1061						5.2842						8.81908
826836	capicua homolog (Drosophila) (predicted) [Rattus norvegicus] [MASS=134496]	R.TQS*LSALPK.E	S173	2.89895	2.6198	149056603	Q96RK0	10831	406908	Akt_Kin (S18) 0.12% Cam_Kin2 (S18) 0.34% 1433_m1 (S18) 0.54%	5.68625e+06	2.41352e+06	1.05453e+06	285136	13552.1	760107	2.356	3.69836	0.0178292	512.76						17.7936	2						4.56803						2.6198						17.7936
827479	capicua homolog (Drosophila) (predicted) [Rattus norvegicus] [MASS=134496]	K.AQS*VSPVQATPSGGSAQLLPGK.V	S899*	2.37956	4.7265	149056603	Q924A2		406908		524149	593560	760016	2.54445e+06	2.09985e+06	3.52793e+06	0.883059	0.298696	0.595206	1080.54			1080.55			6.19789	2			2			2.37956			6.66178			3.0179			4.7265			6.19789			6.19789
822820	capicua homolog (Drosophila) (predicted) [Rattus norvegicus] [MASS=134496]	K.AQSVS*PVQATPSGGSAQLLPGK.V	S901*	0.296287	5.7677	149056603	Q924A2		406908		534942	227114	760016	1.65214e+06	2.09985e+06	3.51682e+06	2.35539	0.460019	0.597086	1080.54	1080.55	1080.54	1080.54	1080.55	1080.54	17.3813	2	2	2	2	2	2	2.14344	11.7495	1.80086	1.80086	10.6199	5.07851	4.1654	4.1358	4.1817	5.7677	4.9651	5.4951	12.043	4.86719	17.3813	17.3813	4.31364
825074	capicua homolog [Rattus norvegicus] [MASS=163781]	K.NSTDLDSAPEDPTS*PK.R	S1406*	1.43695	3.7435	158711712	Q96RK0	10831	406908	Cdk5_Kin (S1254) 0.01% Cdc2_Kin (S1254) 0.02%	6.75711e+06	1.07609e+07	3.73271e+06	5.32747e+06	1.24306e+06	3.11588e+06	0.62793	0.700654	0.398943	877.369	877.368	877.366	877.365			22.4677	2	2	2	2			8.53608	7.18469	4.499	3.52393			3.7435	3.4847	2.8983	3.2371			13.8917	8.22355	19.0849	22.4677
825255	capicua homolog [Rattus norvegicus] [MASS=163781]	K.NSTDLDSAPEDPT*SPK.R	T1405*	1.36852	3.6631	158711712	Q96RK0	10831	406908		1.22776e+07	1.10991e+07	1.87715e+06	5.34146e+06	1.10831e+06	3.13456e+06	1.10618	0.35143	0.353576	877.37	877.368	877.363				93.826	2	2	2				9.23174	7.07635	1.36852				2.894	3.6631	3.186				54.1817	93.826	60.9223
827265	carbamyl phosphate synthetase I precursor [Rattus norvegicus]	K.VMIGES*VDEK.H	S1287	3.92748	2.9255	203576	P07756		403020		968526	569958	13115.3	23765.5	155271	6899.03	1.69929	0.551862	22.5062		593.759					100		2						3.92748						2.9255						100
827336	carbamyl phosphate synthetase I precursor [Rattus norvegicus]	R.DGS*IDLVINLPNNNTK.F	S1431	4.79835	4.9848	203576	P31327	1995	403020	PKC_mu (S1431) 0.08% Akt_Kin (S1431) 0.77% PKA_Kin (S1431) 01.04%	580908	552529	519474	663917	44276.4	15523.3	1.05136	0.782439	2.85225	903.944		903.942	903.942			109.841	2		2	2			9.92871		7.90314	7.49913			3.8287		4.9848	4.2944			94.4937		109.841	109.382
824910	carbamyl phosphate synthetase I precursor [Rattus norvegicus]	K.IEFEGQS*VDFVDPNKQNLIAEVSTK.D	S189	2.38624	4.7254	203576	Q8C196		403020		3763.32	165527	6936.27	134035	7095.27	22574.1	0.0227354	0.0517499	0.314311				963.133			86.9113				3						2.38624						4.7254						86.9113
827297	carbamyl phosphate synthetase I precursor [Rattus norvegicus]	K.IEFEGQS*VDFVDPNK.Q	S189	3.49819	3.8833	203576	Q8C196		403020		1.07315e+06	850796	114844	107338	104248	131371	1.26135	1.06993	0.793535	902.399	902.406					100	2	2					3.49819	12.0745					3.1669	3.8833					100	100
827308	carbamyl phosphate synthetase I precursor [Rattus norvegicus]	K.GLNSES*VTEETLR.Q	S898	7.88283	3.3755	203576	P07756		403020		2.05957e+06	1.78212e+06	599562	5682610	804647	87523.1	1.15568	0.105508	9.19354		757.846					25.8003		2						7.88283						3.3755						25.8003
822194	carbamyl phosphate synthetase I precursor [Rattus norvegicus]	K.IMGT*SPLQIDR.A	T1078	3.96758	3.2793	203576	P31327	1995	403020		3474.62	7965.07	10581.5	4072.85	945408	11995.4	0.436233	2.59806	78.8144					655.817							2						7.69097						3.2793
824772	carbohydrate responsive element binding protein [Rattus norvegicus]	R.VVPSPDS*DS*DTDLEDPSPR.R	S23S25	0.69475	3.8759	17132506	Q99MZ3			Casn_Kin2 (S25) 0.42%	3.48979e+06	2.52017e+06	6.12701e+06	6.19568e+06	1.81078e+06	5.39853e+06	1.38475	0.988918	0.335421	1094.43	1094.43	1094.43			1094.44	35.0697	2	2	2			2	4.48843	10.6268	4.15477			18.9956	2.8858	2.8797	3.8759			3.6827	35.0697	15.9988	32.9334
822776	carbohydrate responsive element binding protein [Rattus norvegicus]	R.KAS*PPTLTSATASPTATATAR.D	S516	0.0240266	5.2691	17132506				PKA_Kin (S516) 0.42%	18288.8	105568	1.61734e+06	1.35656e+07	3.23065e+06	1.63094e+07	0.173241	0.119224	0.198085				1041.02	1041.03	1041.03	90.7113				2	2	2				0.446894	16.5204	8.42365				5.2691	4.8344	4.8092				90.7113	76.816
823816	carbohydrate responsive element binding protein [Rattus norvegicus]	K.AERLS*PPASSGSER.R	S615	1.95578	3.914	17132506	Q99MZ3			GSK3_Kin (S614) 0.53%	26642.4	7.49658e+06	4.4143e+06	6.9189e+06	5.12972e+06	1.30324e+07	0.00355394	0.638006	0.393611			508.568	508.568	508.57	508.57	81.7082			3	3	3	3			2.55958	1.95578	7.00271	6.33985			2.9625	3.4737	3.7583	3.914			80.5539	45.2976	79.8518
822727	carbonic anhydrase III [Rattus norvegicus]	R.HDPSLQPWSVS*YDPGSAK.T	S50	1.81384	3.7662	2708636	P14141		400947		9882.1	380470	1.28522e+06	2.6084e+06	668997	1482217	0.0259734	0.492725	0.451349		1025.96	1025.95	1025.95	1025.95	1025.97	19.8227		2	2	2	2	2		15.3053	4.07626	5.62679	1.81384	19.674		3.6208	3.4169	3.0935	3.7662	3.5322		8.93947	13.9358	19.8227	13.9358
825578	carbonic anhydrase III [Rattus norvegicus]	R.HDPSLQPWSVS*YDPGSAK.T	S50	1.93086	5.03	2708636	P14141		400947		19286	771692	3.01958e+06	5.20205e+06	2.42267e+06	1.39718e+06	0.0249919	0.580459	1.73398			684.304	684.303			19.8227			3	3					3.6033	2.01863					4.6276	5.03					13.9358	19.8227
826745	carbonyl reductase (NADPH) [Rattus norvegicus]	K.SCS*PELQQK.F	S151	2.23092	2.5604	666087	P16152	267	416881		1.04767e+06	518034	6079.88	83935.7	2655.63	5291.53	2.0224	0.0724349	0.501865		578.74					39.8691		2						2.23092						2.5604						39.8691
823700	casein kinase 1 delta [Rattus norvegicus]	R.GAPVNVS*SSDLTGR.Q	S382	3.07018	2.4632	14422451	Q9DC28				291097	348634	391343	1.26362e+06	347681	981682	0.834964	0.309699	0.354169						720.332	20.6145						2						3.07018						2.4632
825207	cask-interacting protein 2 (predicted) [Rattus norvegicus] [MASS=126983]	R.VGLSPDSPAGDRNS*VGS*EGS*VGSIR.S	S403S406S409*	1.39011	4.9339	149054796	Q8WXE0	9872	397523		90416.9	398448	21997.4	239054	31720.3	4204.53	0.226923	0.0920186	7.54431		880.702		880.695			24.7244		3		3				6.58311		1.39011				4.561		4.9339				10.3229		24.7244
827253	cask-interacting protein 2 (predicted) [Rattus norvegicus] [MASS=126983]	R.NSVGS*EGSVGSIR.S	S406*	8.88156	3.1504	149054796	Q8WXE0	9872	397523		171613	579684	6680.88	ND	48448.1	19655.6	0.296046	6680.88	2.46485		664.802					4.16825		2						8.88156						3.1504						4.16825
827221	cask-interacting protein 2 (predicted) [Rattus norvegicus] [MASS=126983]	R.NSVGSEGS*VGSIR.S	S409*	10.3869	3.1324	149054796	Q8WXE0	9872	397523		43071.4	603277	6680.88	ND	58834.8	18736.3	0.0713957	6680.88	3.14015		664.803					8.33507		2						10.3869						3.1324						8.33507
823643	cask-interacting protein 2 (predicted) [Rattus norvegicus] [MASS=126983]	R.SPS*QESIGAR.S	S696	2.53716	3.7035	149054796	Q8WXE0	9872	397523	DNA_PK (S697) 0.2%	3.32188e+06	1.55304e+06	121641	450308	26937.1	379398	2.13895	0.270128	0.0709996		556.244				556.246	18.8596		2				2		2.53716				5.72208		3.7035				3.1683		18.8596
823408	cask-interacting protein 2 (predicted) [Rattus norvegicus] [MASS=126983]	R.SPS*QES*IGAR.S	S696S699	5.02754	3.8443	149054796	Q8WXE0	9872	397523	DNA_PK (S697) 0.2%	2.60925e+06	1.72805e+06	619935	1.12413e+06	98380.8	1.08769e+06	1.50994	0.55148	0.0904497			596.229	596.223		596.231	48.3877			2	2		2			5.32124	5.02754		8.3931			3.4241	2.7833		3.8443			22.9618	20.0535
822580	cask-interacting protein 2 (predicted) [Rattus norvegicus] [MASS=126983]	R.GS*SGEGLPFAEEGNLTIK.Q	S941	15.6266	3.2476	149054796	Q8WXE0	9872	397523		1.05333e+06	1.53181e+06	64788.8	419842	402196	120652	0.687635	0.154317	3.33352					943.447		94.095					2						15.6266						3.2476						94.095
822545	caspase-9 [Rattus norvegicus]	K.AFDS*DSEPDAVPYQEGPR.T	S348	0.189336	4.7337	8515868			402594		3.03566e+06	3.61387e+06	1.68527e+06	1.6116e+06	772057	7.72546e+06	0.840003	1.04571	0.0999367	1030.43	1030.42	1030.42	1030.43	1030.42	1030.42	60.386	2	2	2	2	2	2	8.58317	5.02952	6.92286	8.58317	3.96148	7.04423	4.5253	4.7337	4.0692	4.2063	3.8684	4.7096	53.8485	60.386	55.2084	39.2689	25.8003
826543	caspase-9 [Rattus norvegicus]	K.AFDSDS*EPDAVPYQEGPR.T	S350	5.79171	3.5465	8515868			402594		1.25522e+06	3.57436e+06	146808	1.56819e+06	674909	1208563	0.351173	0.0936161	0.558439		1030.42					21.214		2						5.79171						3.5465						21.214
822088	Cast protein [Rattus norvegicus] [MASS=73156]	K.GSDEVTASSAATGTS*PR.M	S57	0.949989	5.2026	60551833					1.97336e+07	2.29073e+07	3.06142e+06	3.19718e+06	7538799	4.92466e+06	0.861453	0.957536	1.53083	837.357	837.359	837.356	837.358	837.356	837.361	39.9127	2	2	2	2	2	2	3.02323	5.28168	2.22261	3.97321	1.92985	7.83885	4.6215	4.5213	4.802	4.4969	5.2026	5.0608	39.9127	39.9127	39.9127	39.9127	30.193
822382	Cast protein [Rattus norvegicus] [MASS=73156]	K.KGSDEVTASSAATGTS*PR.M	S57	0.0999003	7.3611	60551833					1.19747e+07	1.04645e+07	1.34751e+07	6.87362e+06	2.44986e+07	2.06541e+07	1.14431	1.96041	1.18614	901.403	901.407	901.406	901.402	901.401	901.413	33.8039	2	2	2	2	2	2	0.910202	5.72203	4.63979	0.344101	1.1211	11.888	7.1131	6.9342	7.1971	7.3611	6.7344	6.6074	27.6042	27.6042	25.5751	33.8039	27.6042
822383	Cast protein [Rattus norvegicus] [MASS=73156]	K.KGSDEVTASSAATGTS*PR.M	S57	0.0222001	4.2339	60551833					1.77719e+07	1.65531e+07	8.64225e+06	9.71286e+06	9.21362e+06	1.76542e+07	1.07363	0.889775	0.521895	601.27	601.271	601.27	601.27	601.273	601.272	29.0327	3	3	3	3	3	3	0.283051	0.632702	0.0222001	0.0222001	3.9849	2.35875	4.0865	3.6888	4.0768	4.1065	4.2158	4.2339	29.0327	22.4115	22.5438	26.0224	22.5438
827428	Cast protein [Rattus norvegicus] [MASS=73156]	K.KGSDEVTASSAATGT*SPR.M	T56	4.63979	5.3861	60551833					7.85203e+06	1.04645e+07	4.50207e+06	2.77112e+06	1.54103e+07	1.26873e+07	0.750346	1.62463	1.21462		901.406					12.0862		2						4.63979						5.3861						12.0862
823435	catalase [Rattus norvegicus]	R.FNS*ANEDNVTQVR.T	S434	0.457531	4.9363	203335	O97492		399685		502629	76406.6	379381	237548	686848	836568	6.57835	1.59707	0.821031			787.336			787.351	140.451			2			2			0.457531			18.9999			4.8239			4.9363			140.451
824024	catalase [Rattus norvegicus]	K.NAIHTYVQAGS*HIAAK.G	S517	0.545192	5.612	203335	P04762		399685		1.80551e+07	6.88667e+06	2.93979e+06	6.88428e+06	1.32171e+06	5.36434e+06	2.62175	0.427029	0.246389		587.623	587.622	587.622		587.624	73.0967		3	3	3		3		3.55509	1.57878	1.68668		5.5314		5.612	3.5942	4.9233		4.7456		73.0967	9.72046	44.7843
824849	catalase [Rattus norvegicus]	K.NAIHTYVQAGS*HIAAK.G	S517	0.198768	4.9414	203335	P04762		399685		43504.8	1.54377e+06	140185	267107	34976.4	47713.1	0.0281809	0.524828	0.733055		880.936		880.932			37.1361		2		2				9.63163		5.53707				3.9498		4.9414				19.3522		37.1361
822153	catechol-O-methyltransferase [Rattus norvegicus]	K.AIYQGPS*SPDKS.-	S259	0.203073	3.8374	55890	P22734		412841		8.35531e+08	9.04145e+08	1.30279e+08	1.21421e+08	9.44358e+08	4.88794e+08	0.924112	1.07296	1.93202	1329.59	1329.59	1329.58	1329.58	1329.59	1329.6	59.5477	1	1	1	1	1	1	10.9432	11.3118	4.97902	3.60265	12.8762	18.6598	3.8374	3.7179	3.6558	3.7505	3.6082	3.2622	46.2579	37.8745	35.5911	59.5477	36.6082
822252	catechol-O-methyltransferase [Rattus norvegicus]	K.AIYQGPS*SPDK.S	S259	1.63375	3.481	55890	P22734		412841		5.9646e+06	9.44494e+06	822760	828520	1.98564e+06	1.09518e+06	0.631512	0.993049	1.81306	1242.55	1242.56		1242.56	1242.54		21.214	1	1		1	1		7.9192	13.2227		13.4159	1.63375		3.481	3.2889		3.0706	3.1712		21.214	15.8451		7.03769	8.22355
823423	catechol-O-methyltransferase [Rattus norvegicus]	K.AIYQGPS*SPDK.S	S259	0.49093	2.705	55890	P22734		412841		2.04087e+07	3.70914e+06	5.43839e+06	7.5376e+06	5.91655e+06	778822	5.50227	0.721501	7.59679		621.776	621.775	621.775		621.783	16.9461		2	2	2		2		3.13872	1.96372	1.77056		14.7357		2.4301	2.705	2.5882		2.2954		12.0862	16.9461	10.7918
824588	catechol-O-methyltransferase [Rattus norvegicus]	K.AIYQGPS*SPDKS.-	S259	2.16611	3.4462	55890	P22734		412841		6.44848e+06	4.07618e+06	895252	7.93076e+06	9.944e+06	1.00256e+06	1.58199	0.112883	9.91862		665.295	665.292	665.28		665.303	49.1569		2	2	2		2		7.58133	3.08369	15.2232		19.2464		2.81	2.7751	3.4462		2.0722		19.3323	49.1569	28.2609
822505	catechol-O-methyltransferase [Rattus norvegicus]	K.AIYQGPS*SPDKS*.-	S259S264	0.21993	3.9497	55890	P22734		412841		1.74895e+07	2.29925e+07	7.22205e+06	1.818e+07	7.77639e+06	2.10848e+07	0.760661	0.397253	0.368815	705.276	705.279	705.274	705.274	705.276	705.283	51.7212	2	2	2	2	2	2	4.8881	8.35018	1.07837	1.85876	4.97323	14.4159	3.4389	3.9497	3.9116	3.9019	3.2271	3.4495	36.0935	40.1802	51.7212	39.0257	33.2901
825082	catechol-O-methyltransferase [Rattus norvegicus]	K.AIYQGPS*SPDKS*.-	S259S264	3.377	2.9902	55890	P22734		412841		1.49064e+06	1.80567e+06	8749.02	133360	607863	1.77223e+06	0.825534	0.0656048	0.342993	1409.56	1409.55		1409.53			27.6448	1	1		1			12.9899	5.45566		3.377			2.5591	2.5621		2.9902			19.4718	16.0236		27.6448
821778	catechol-O-methyltransferase [Rattus norvegicus]	K.AIYQGPSS*PDKS.-	S260	0.0376061	4.1577	55890	P22734		412841		6.09439e+09	5.75849e+09	2714590883	4732636666	3.54205e+09	3.41275e+09	1.05833	0.57359	1.03789	665.293	665.294	665.293	665.293	665.296	665.302	46.6469	2	2	2	2	2	2	4.27955	5.74618	4.55031	5.37764	9.87526	18.1408	3.8035	4.1577	3.9077	3.7809	3.8847	3.6478	38.2998	45.2895	46.6469	34.3204	30.193
821863	catechol-O-methyltransferase [Rattus norvegicus]	K.AIYQGPSS*PDKS.-	S260	0.481358	3.7944	55890	P22734		412841		8.35017e+08	9.0335e+08	1.44722e+08	3.46838e+08	9.43828e+08	4.91845e+08	0.924357	0.417261	1.91895	1329.59	1329.58	1329.59	1329.58	1329.59	1329.6	23.6658	1	1	1	1	1	1	11.0335	2.77532	13.7937	5.61832	12.4174	19.1186	3.7944	3.6694	3.6237	3.7386	3.7522	3.4728	12.5527	20.0607	23.6658	10.3703	10.3703
822115	catechol-O-methyltransferase [Rattus norvegicus]	K.AIYQGPSS*PDK.S	S260	0.587506	2.8366	55890	P22734		412841		2.44843e+07	2.32309e+07	9.49893e+06	1.33273e+07	5.91655e+06	5.58031e+06	1.05395	0.712741	1.06025	621.776	621.777	621.778	621.778	621.777	621.777	25.5751	2	2	2	2	2	2	3.4365	5.79455	6.77639	6.97759	5.79455	5.89112	2.3363	2.617	2.6295	2.7712	2.6335	2.8366	22.4677	25.5751	22.4677	20.096	19.0849
827286	catechol-O-methyltransferase [Rattus norvegicus]	K.AIYQGPSS*PDK.S	S260	1.92348	3.6692	55890	P22734		412841		4.12362e+06	3.57205e+06	425487	828520	1.98564e+06	791065	1.15441	0.513551	2.51008	1242.54	1242.56					23.8995	1	1					1.92348	17.5444					3.2011	3.6692					23.8995	10.3572
825182	catechol-O-methyltransferase [Rattus norvegicus]	K.AIYQGPSS*PDKS*.-	S260S264	3.58981	3.9758	55890	P22734		412841		1.74895e+07	2.29925e+07	2.11746e+06	1.43889e+07	7.77639e+06	2.10848e+07	0.760661	0.147159	0.368815		705.277	705.277	705.276			40.319		2	2	2				5.32086	5.23573	4.97323				3.9758	3.8371	3.6074				37.8133	30.6976	40.319
826356	catechol-O-methyltransferase [Rattus norvegicus]	K.AIYQGPSS*PDKS*.-	S260S264	1.99356	3.6999	55890	P22734		412841		1.49064e+06	1.80567e+06	ND	136487	657979	1.05958e+06	0.825534	7.32671e-06	0.62098	1409.54	1409.55					25.1454	1	1					3.29185	7.27892					3.0168	3.6999					25.1454	23.613
822666	catechol-O-methyltransferase [Rattus norvegicus]	K.AIYQGPSSPDKS*.-	S264	0.421188	4.3484	55890	P22734		412841		6.09005e+09	5.75615e+09	2.7146e+09	4.73264e+09	1.98993e+09	3.41231e+09	1.05801	0.57359	0.58316	665.292	665.292	665.29	665.29	665.294		71.2876	2	2	2	2	2		2.99344	3.27172	1.06801	0.421188	7.03229		3.9513	4.3484	3.8009	3.9476	3.8887		41.4063	71.2876	55.6148	41.4063	35.2652
825066	catechol-O-methyltransferase [Rattus norvegicus]	K.AIYQGPSSPDKS*.-	S264	4.06144	3.9789	55890	P22734		412841		8.3565e+08	9.05464e+08	1.52257e+08	3.45598e+08	9.43789e+08	4.88378e+08	0.922897	0.440561	1.9325	1329.58	1329.58		1329.58			37.7833	1	1		1			4.52023	5.15953		8.46882			3.5604	3.9789		3.6833			36.8124	37.7833		26.8831
824439	catechol-O-methyltransferase [Rattus norvegicus]	K.AIY*QGPSSPDK.S	Y255	7.42828	3.2665	55890	P22734		412841	Crk_SH2 (Y255) 0.26% Abl_SH2 (Y255) 0.49% Lck_SH2 (Y255) 0.77%	4.23141e+06	9.45263e+06	121709	208262	508256	1.09518e+06	0.447643	0.584402	0.464083	1242.55				1242.55		12.6423	1				1		7.42828				9.78631		3.2665				3.0708		9.20819				12.6423
825059	catechol-O-methyltransferase [Rattus norvegicus]	K.AIY*QGPSSPDKS.-	Y255	4.15169	3.6398	55890	P22734		412841	Crk_SH2 (Y255) 0.26% Abl_SH2 (Y255) 0.49% Lck_SH2 (Y255) 0.77%	8.3562e+08	5.75732e+08	1.30376e+08	1.21464e+08	6.03517e+08	4.88466e+08	1.4514	1.07337	1.23554	1329.59			1329.58			14.0051	1			1			10.2137			4.15169			3.6398			3.2963			14.0051			8.23909
824951	catenin (cadherin associated protein), delta 1 (predicted), isoform CRA_a [Rattus norvegicus] [MASS=104071]	R.SQS*SHSYDDSTLPLIDR.N	S855*	0.459802	3.3345	149022411	O60716	3026	411520		44810.8	19620.4	283979	50558.2	ND	47969.2	2.28389	5.61687	2.08467e-05			667.625				5.04395			3						0.459802						3.3345						5.04395
824972	catenin (cadherin associated protein), delta 1 (predicted), isoform CRA_a [Rattus norvegicus] [MASS=104071]	R.SQSS*HSYDDSTLPLIDR.N	S856*	3.02369	4.2682	149022411	O60716	3026	411520		44810.8	16913.2	283979	67939	ND	47969.2	2.64946	4.17991	2.08467e-05			667.627				1.57608			3						3.02369						4.2682						1.57608
825001	catenin (cadherin associated protein), delta 1 (predicted), isoform CRA_a [Rattus norvegicus] [MASS=104071]	R.SQSSHS*YDDSTLPLIDR.N	S858*	5.59256	3.5367	149022411	O60716	3026	411520		ND	8317.77	47605	11763	11613.9	7855.83	0.000120224	4.04701	1.47837			1000.94				10.7918			2						5.59256						3.5367						10.7918
825034	catenin (cadherin associated protein), delta 1 (predicted), isoform CRA_a [Rattus norvegicus] [MASS=104071]	R.SQSSHS*YDDSTLPLIDR.N	S858*	2.64386	4.401	149022411	O60716	3026	411520		44810.8	19620.4	283979	50558.2	ND	47969.2	2.28389	5.61687	2.08467e-05			667.627				2.46334			3						2.65385						4.401						2.46334
823381	Catenin (cadherin-associated protein), alpha 1, 102kDa [Rattus norvegicus]	R.TPEELDDS*DFETEDFDVR.S	S643*	0.0803981	6.668	55249717	P35221	285	398354	Casn_Kin2 (S641) 0.26%	2.977e+06	2.53e+06	4.30679e+06	8.20837e+06	1.98071e+06	3.77827e+06	1.17668	0.524683	0.524238	1119.95	1119.94	1119.94	1119.94		1119.96	110.417	2	2	2	2		2	10.5097	6.47647	5.38217	2.76033		19.8847	5.087	6.2951	5.8597	6.249		6.668	68.3411	110.417	86.9402	83.2797
827617	Catenin (cadherin-associated protein), alpha 1, 102kDa [Rattus norvegicus]	R.SRTS*VQTEDDQLIAGQSAR.A	S657*	7.54914	4.6103	55249717	P35221	228	398354		84922.9	360851	278406	9775.05	ND	41875.5	0.235341	28.4812	2.38803e-05		1071.49					7.03769		2						7.54914						4.6103						7.03769
827607	Catenin (cadherin-associated protein), alpha 1, 102kDa [Rattus norvegicus]	R.SRT*SVQTEDDQLIAGQSAR.A	T656*	5.04208	4.3235	55249717	P35221	228	398354		84922.9	359516	281842	15139.3	ND	12293.5	0.236214	18.6166	8.13438e-05		1071.49					-0.268721		2						5.04208						4.3235
826232	Catenin, beta like 1 [Rattus norvegicus]	K.EYAENIGDGRS*PEFR.E	S545	4.56101	2.9067	66910565	O62703	10850	402216	Cdc2_Kin (S104) 0.65%	3.48177e+06	4.66415e+06	6.19407e+06	8.74096e+06	489870	485366	0.746496	0.708626	1.00928	607.263	607.263					49.2146	3	3					4.56101	5.26988					2.9067	2.8709					48.95	49.2146
826425	Cbl-b [Rattus norvegicus]	R.QNSPVTSPGS*SPLAQR.R	S483*	3.62294	3.8686	21886624	Q13191	5136	396229		690205	1.3384e+06	216170	411212	147763	64809.7	0.515693	0.52569	2.27995		853.402		853.405			28.431		2		2				3.98054		6.9117				3.3443		3.8686				28.431		28.1518
828057	Cbl-b [Rattus norvegicus]	R.QNSPVTSPGSS*PLAQR.R	S484*	5.3406	3.1778	21886624	Q13191	5136	396229		12376.8	128714	169967	409432	21866.9	46306.6	0.0961579	0.415129	0.472219				853.403			6.53213				2						5.3406						3.1778						6.53213
821985	Cc2-27 [Rattus norvegicus] [MASS=120524]	K.GILFVGSGVS*GGEEGAR.Y	S284	1.78852	6.0723	33086672	P38720	1391			1.04894e+06	2.29571e+06	933488	974395	2.90829e+06	1.60576e+06	0.456912	0.958018	1.81116			836.395	836.396	836.395	836.392	30.667			2	2	2	2			5.15019	6.3166	5.73041	1.78852			5.3562	5.0143	5.0691	6.0723			30.667	28.431	20.6912
825000	Cc2-27 [Rattus norvegicus] [MASS=120524]	R.T*VSKVDDFLAK.E	T190	2.98625	3.1159	33086672					ND	ND	ND	ND	44124.6	8430.57	1	1	5.23389			651.823							2						2.98625						3.1159
826768	CCCH-type zinc finger antiviral protein [Rattus norvegicus]	R.AQLS*PVSSK.A	S307	2.11746	3.1065	21693591	Q8K3Y6		402924		5428.62	2.60775e+06	482656	1.0251e+06	4142.47	5879.9	0.00208172	0.470838	0.704513		498.743					39.9306		2						2.11746						3.1065						39.9306
822840	Ccm2 protein [Rattus norvegicus] [MASS=49831]	R.GIITDS*FGR.H	S393	3.65384	1.7967	169642193	Q6DRP4	9719	399199		138048	440595	1.14792e+06	2.85371e+06	549766	554408	0.313322	0.402255	0.991627			1045.48		1045.49		35.3857			1		1				7.6233		17.3125				1.6205		1.7967				35.3857		26.0224
824148	Ccm2 protein [Rattus norvegicus] [MASS=49831]	R.GIITDS*FGR.H	S393	0.899115	3.1484	169642193	Q6DRP4	9719	399199		217823	1.98761e+06	862999	1.03605e+06	1.83584e+06	977211	0.10959	0.83297	1.87865		523.243	523.241		523.248	523.246	55.2084		2	2		2	2		7.7859	2.41039		17.2455	12.3388		2.7252	2.7785		3.1484	3.1341		55.2084	38.1697		44.9354
822610	Ccnk protein [Rattus norvegicus] [MASS=65366]	K.KPS*PQPS*PPR.Q	S332S336*	0.175925	3.4408	120537442	O88874		398879	GSK3_Kin (S329) 0.15% Cdk5_Kin (S329) 0.28% Cdc2_Kin (S329) 0.38% GSK3_Kin (S325) 0.49% Erk1_Kin (S325) 0.7%	3.63717e+06	6.3413e+06	2.61918e+06	3.76027e+06	9.93794e+06	1.91749e+06	0.573568	0.696541	5.18278	625.773	625.773	625.77	625.771	625.775	625.779	100	2	2	2	2	2	2	5.05382	4.1822	0.175925	0.663717	8.37236	14.6255	3.0136	2.8694	3.2545	3.332	3.4408	2.8943	100	100	100	100	100
824837	Ccnk protein [Rattus norvegicus] [MASS=65366]	R.AVVVS*PKEENK.A	S348	0.500145	3.8328	120537442	O75909	10352	398879		706788	1.30754e+07	604769	274649	417190	103212	0.0540547	2.20197	4.04208	640.32		640.319	640.32			100	2		2	2			1.87554		0.500145	1.87554			3.4786		3.354	3.8328			100		100	100
822915	CCR4-NOT transcription complex, subunit 2 (predicted) [Rattus norvegicus] [MASS=47086]	R.TNSMSSSGLGS*PNR.S	S80*	1.88525	4.5421	56388618	Q9NZN8	5367	397851	Cdc2_Kin (S165) 0.36% Cdk5_Kin (S165) 0.37% p38_Kin (S165) 0.5% Erk1_Kin (S165) 0.53% GSK3_Kin (S165) 0.79%	273670	3.3148e+06	957710	841125	2.13491e+06	18612.1	0.0825599	1.13861	114.705	737.805	737.806			737.814		62.2603	2	2			2		2.95673	3.28902			14.4647		4.1811	4.5421			4.2484		51.9096	57.227			62.2603
821993	CD2AP/CMS [Rattus norvegicus]	K.S*VDLDALVAR.N	S458	1.79175	4.2665	28848862			401855	Cam_Kin2 (S458) 0.38%	622042	1.87231e+06	1.149e+06	5.93152e+06	2.02255e+06	296402	0.332232	0.193712	6.82366	569.785	569.783	569.781	569.781	569.787	569.783	100	2	2	2	2	2	2	10.2586	6.71903	3.28487	3.82942	13.7981	6.71903	3.0566	3.8732	3.6211	3.611	3.1118	4.2665	100	100	100	100	100
823963	CD2AP/CMS [Rattus norvegicus]	R.FNGGHS*PTQS*PEK.T	S510S514*	5.28602	3.5488	28848862	Q9JLQ0		401855	GSK3_Kin (S514) 0.53% Cdk5_Kin (S518) 0.75% Cdc2_Kin (S518) 0.8%	36673.3	280597	389271	133654	1.97979e+06	414259	0.130697	2.91252	4.77911					773.299	773.296	24.1246					2	2					9.4721	5.28602					3.5488	2.7459					24.1246
824431	CD2AP/CMS [Rattus norvegicus]	R.FNGGHS*PTQS*PEK.T	S510S514*	8.20399	2.5139	28848862	Q9JLQ0		401855	GSK3_Kin (S514) 0.53% Cdk5_Kin (S518) 0.75% Cdc2_Kin (S518) 0.8%	2710.35	21054.6	348803	269172	399025	920978	0.12873	1.29584	0.433262					515.868		15.7573					3						8.20399						2.5139						15.7573
825169	CD7 antigen (p41), isoform CRA_b [Homo sapiens] [MASS=21045]	K.LSS*ERLR.E	S3	11.3563	2.2844	119610170					998154	580750	1.46746e+06	1.60167e+06	959792	390706	1.71873	0.916204	2.45656				470.729			30.193				2						11.3563						2.2844						30.193
823312	CDC10 [Rattus norvegicus]	R.ILEQQNSSRT*LEK.N	T425	3.54903	3.8229	5019815	Q6Q137	4398	398649		452030	293886	2273.65	73645.4	674696	3932.1	1.53811	0.0308729	171.587		813.401			813.408		18.4321		2			2			3.54903			11.5081			3.8229			3.5956			12.1748			18.4321
828079	Cdc2l5 protein [Rattus norvegicus] [MASS=55744]	K.QTDPST*PQQESSK.S	T149	5.65902	3.2803	71051832	Q14004	4496	402778	GSK3_Kin (T1147) 0.38%	ND	ND	190269	55524.4	1228.07	243.767	1	3.42676	5.03788			756.819	756.819			23.8995			2	2					6.46556	5.90362					3.2803	3.1425					23.8995	16.9461
824624	Cdc2-related kinase, arginine/serine-rich [Mus musculus] [MASS=162754]	R.RT*PTMPQEEAAEK.R	T1240	11.5838	3.3463	123238170					34988.2	65618.9	65296.8	ND	3170.03	1.42554e+06	0.533203	65296.8	0.00222374						784.354	20.096						2						11.5838						3.3463
823485	CDC42 effector protein (Rho GTPase binding) 1 [Rattus norvegicus] [MASS=41028]	R.RSDS*LLSFR.F	S209*	0.620397	3.254	118764145	Q00587	7303	399696	Akt_Kin (S192) 0.44% PKC_mu (S192) 0.95%	1.37829e+06	933915	355097	430280	134035	996231	1.47582	0.82527	0.134542	580.777		580.777	580.778		580.78	44.6853	2		2	2		2	0.620397		0.620397	2.61945		5.87651	3.254		2.8457	3.1134		3.0998	44.6853		44.6853	37.6956
822093	Cdc42 effector, long isoform [Rattus norvegicus] [MASS=70435]	R.TVS*DGTISASK.Q	S295	0.768217	3.693	87299584			403101		8.7898e+06	7.4769e+06	8.64049e+06	3.83124e+06	1.6274e+06	1.47693e+06	1.17559	2.25527	1.10188	573.26	573.26	573.259	573.259	573.259	573.261	54.1888	2	2	2	2	2	2	3.64029	4.4958	1.83324	1.19597	1.83324	5.77033	3.1698	3.5398	3.5821	3.693	3.641	3.5831	35.8003	35.0978	40.192	54.1888	22.3754
822094	Cdc42 effector, long isoform [Rattus norvegicus] [MASS=70435]	R.TVS*DGTISASK.Q	S295	2.53162	2.0324	87299584			403101		2.83063e+06	2.18099e+06	188998	289983	427475	167233	1.29787	0.651755	2.55616	1145.52	1145.52			1145.51		28.1954	1	1			1		7.6472	10.6327			4.45215		1.9291	1.9104			2.0324		13.8917	28.1954			13.8917
826965	Cdc42 effector, long isoform [Rattus norvegicus] [MASS=70435]	R.ES*PEGSYTDDANQEVR.G	S501*	3.05318	3.938	87299584	Q5T0N5	12317	403101		4.01374e+06	1.9799e+06	26816.2	52719.9	198621	145158	2.02724	0.508654	1.36831	938.868						10.9691	2						3.05318						3.938						10.9691
826806	Cdc42 effector, long isoform [Rattus norvegicus] [MASS=70435]	R.ESPEGS*YTDDANQEVR.G	S505*	4.8382	3.7078	87299584	Q5T0N5	12317	403101		4.01374e+06	1.9799e+06	4917.95	67186.1	201021	209322	2.02724	0.0731989	0.960343	938.87						11.4617	2						4.8382						3.7078						11.4617
825165	Cdc42 effector, long isoform [Rattus norvegicus] [MASS=70435]	R.TVSDGT*ISASK.Q	T298	2.36576	2.9707	87299584			403101		8.7898e+06	5.59738e+06	8.64049e+06	3.83124e+06	1.60184e+06	1.56667e+06	1.57034	2.25527	1.02245	573.26			573.259			12.9226	2			2			4.28629			2.36576			2.9707			2.845			8.80814			12.9226
827667	CDC42-binding protein kinase beta [Rattus norvegicus] [MASS=194886]	K.HSTPSNSSNPS*GPPSPNSPHR.S	S1688	2.03067	3.888	30841498	Q9Y5S2	8516	409843	GSK3_Kin (S1686) 0.06%	119876	14564.2	183934	13985.5	301	54732	8.23084	13.1518	0.00549952	1110.97						19.1532	2						2.03067						3.888						19.1532
822473	CDC42-binding protein kinase beta [Rattus norvegicus] [MASS=194886]	K.HSTPSNSSNPSGPPS*PNSPHR.S	S1692	0.108062	6.563	30841498	Q9Y5S2	8516	409843	Erk1_Kin (S1690) 0.03% p38_Kin (S1690) 0.11% GSK3_Kin (S1690) 0.33%	1.71249e+06	7.5149e+06	1.96801e+06	1.95874e+06	5.2203e+06	1.87576e+06	0.227879	1.00474	2.78303	740.986	740.987	740.987	740.986	740.988		46.4953	3	3	3	3	3		0.986067	1.9226	1.75601	0.986067	3.89923		5.6527	6.563	6.3259	6.1516	6.1036		36.4448	36.4448	46.4953	29.1353	21.8653
824906	CDC42-binding protein kinase beta [Rattus norvegicus] [MASS=194886]	K.HSTPSNSSNPSGPPS*PNSPHR.S	S1692	3.23735	4.6839	30841498	Q9Y5S2	8516	409843	Erk1_Kin (S1690) 0.03% p38_Kin (S1690) 0.11% GSK3_Kin (S1690) 0.33%	112756	47929	186543	54002	144364	86972.5	2.35255	3.45437	1.65988	1110.99	1110.98		1110.98			75.8279	2	2		2			10.6125	4.67817		3.35892			4.573	4.6839		3.2594			75.8279	22.4009		14.3391
822369	CDC42-binding protein kinase beta [Rattus norvegicus] [MASS=194886]	K.HSTPSNSSNPSGPPSPNS*PHR.S	S1695	0.986067	5.9344	30841498	Q9Y5S2	8516	409843	Cdc2_Kin (S1693) 0.16% Cdk5_Kin (S1693) 0.24% p38_Kin (S1693) 0.57% GSK3_Kin (S1693) 0.79%	339846	7.49912e+06	1.96801e+06	4.09882e+06	4.23042e+06	1.62857e+06	0.0453181	0.480141	2.59764	740.989	740.986	740.986		740.989		28.7307	3	3	3		3		5.13743	1.01308	0.986067		4.48006		5.8341	5.3831	5.9344		5.1683		11.3454	16.8245	28.7307		13.7171
827778	cell division cycle 2 homolog (S.pombe)-like 1 [Rattus norvegicus]	R.EYGS*PLKAYT*PVVVTLWYR.A	S232T238*	2.7767	5.9759	21955152	P21127	8909	404893	Cdk5_Kin (S228) 0.55% Cdc2_Kin (S228) 0.77%	541351	271568	1.03544e+06	2.49254e+06	7719.13	22371.5	1.99343	0.415414	0.345043				801.382			20.0618				3						3.32621						5.9759						20.0618
822488	cell division cycle 2-like 5 (cholinesterase-related cell division controller) [Rattus norvegicus] [MASS=99274]	R.LYSSEESRPYT*NK.V	T257	1.04008	3.1977	149032519	Q14004	4496	402778		815869	1.18316e+06	451213	678120	898568	2.28709e+06	0.689569	0.665387	0.392887	827.368	827.365	827.362		827.366	827.369	39.9127	2	2	2		2	2	8.12709	4.8799	1.04008		5.1762	9.01598	3.1977	3.1312	2.7819		2.4836	2.4804	39.9127	39.9127	39.9127		33.8039
826064	cell membrane glycoprotein 110000Mr (surface antigen) homolog [Rattus norvegicus]	K.DKKDEEEDMS*LD.-	S405	6.03818	2.8446	7339666	Q16186	6440	399207	PDZ_class1 (S405) 00%	4.15561e+06	2.24643e+06	3564920	1.22933e+06	855473	3.41762e+06	1.84987	2.8999	0.250312	767.291	767.292					100	2	2					6.03818	6.37073					2.8446	2.379					100	100
823709	centromere autoantigen F [Rattus norvegicus] [MASS=303785]	K.DISLDS*YK.A	S868	2.62634	2.625	149041007			396948		1.69292e+06	1.88408e+06	3.45449e+06	8.69614e+06	357264	1.3359e+06	0.89854	0.397244	0.267433						1020.43	23.8995						1						2.62634						2.625
821927	Chain A, X-Ray Structure Of Cysteine Dioxygenase Type I From Mus Musculus Mm.241056	-.S*ERT*ELLK.P	S1T4	11.1934	2.3987	82407886					1.58503e+07	2.67917e+07	5.02682e+06	3.55767e+06	16167536	4.24575e+07	0.591613	1.41295	0.380793	1135.5	1135.5	1135.5	1135.5	1135.49	1135.49	100	1	1	1	1	1	1	17.5341	16.5654	16.1339	14.9538	12.805	12.1621	2.1978	2.3987	2.2695	2.1913	2.0365	2.1604	100	100	100	100	100
821928	Chain A, X-Ray Structure Of Cysteine Dioxygenase Type I From Mus Musculus Mm.241056	-.S*ERT*ELLK.P	S1T4	12.3118	2.8314	82407886					7.88578e+06	8.27474e+06	2.89155e+06	4.26197e+06	1.88701e+06	3.03748e+06	0.952995	0.678453	0.621243		568.253	568.251	568.251	568.252		100		2	2	2	2			16.7151	13.4919	12.6289	15.4294			2.3872	2.8314	2.7079	2.5449			100	100	100	100
823314	chromobox homolog 5 (Drosophila HP1a) (predicted), isoform CRA_a [Rattus norvegicus]	R.KSS*FSNSADDIK.S	S93	5.52736	4.2199	149031882	Q61686			Cam_Kin2 (S93) 0.12% PKC_epsilon (S93) 0.36% Akt_Kin (S93) 0.6% PKA_Kin (S93) 0.71%	1.81829e+06	815676	711973	502420	1.31773e+06	1.3607e+06	2.22918	1.41709	0.968421					689.804		26.0224					2						8.4506						4.2199						26.0224
824794	chromodomain helicase DNA binding protein 4, isoform CRA_a [Rattus norvegicus] [MASS=113418]	K.MSQPGS*PSPK.T	S587*	1.99004	2.6118	149049417	Q14839	4472	405603	Erk1_Kin (S1535) 0.12% Cdc2_Kin (S1535) 0.14% Cdk5_Kin (S1535) 0.27% p38_Kin (S1535) 0.54%	6.97701e+06	9.35895e+06	640930	732640	6.35907e+06	345298	0.74549	0.874822	18.4162		548.232	548.232	548.233		548.236	27.6809		2	2	2		2		1.99004	3.33194	3.77924		10.4613		2.2015	2.6118	2.495		2.4588		16.118	24.1234	14.6862
826546	chromodomain helicase DNA binding protein 4, isoform CRA_a [Rattus norvegicus] [MASS=113418]	K.MSQPGS*PSPK.T	S587*	7.07464	1.8619	149049417	Q14839	4472	405603	Erk1_Kin (S1535) 0.12% Cdc2_Kin (S1535) 0.14% Cdk5_Kin (S1535) 0.27% p38_Kin (S1535) 0.54%	1.23362e+06	4.65755e+06	1.15923e+06	5.35852e+06	1.93876e+07	10911.4	0.264863	0.216335	1776.83		1095.46					13.9358		1						7.07464						1.8619						13.9358
826496	cingulin-like 1 [Rattus norvegicus]	K.EGVGEETLS*PR.R	S251	2.63254	2.5951	157823279			404981	Cdk5_Kin (S252) 0.02% Cdc2_Kin (S252) 0.04%	2.85996e+06	3.35533e+06	595772	187864	212668	185385	0.852364	3.17129	1.14717	627.276	627.279					25.8003	2	2					2.63254	7.88959					2.4659	2.5951					25.8003	11.8089
821940	CL2AA [Rattus norvegicus]	R.GNS*DGYIIPINK.E	S1423	1.16734	3.6784	3695123	O97817	6116	412298		305270	307334	1.27622e+06	839445	504768	259662	0.993286	1.52031	1.94394			685.822	685.825	685.822		48.3877			2	2	2				1.69994	5.53025	1.16734				3.475	3.6784	2.4726				48.3877	44.9354	22.043
824107	cleavage stimulation factor, 3' pre-RNA, subunit 3 (predicted), isoform CRA_a [Rattus norvegicus] [MASS=82876]	K.RPNEDS*DEDEEKGAVVPPVHDIYR.A	S691*	0.0351338	4.8068	149022800	Q12996	2651	401865	Casn_Kin2 (S691) 0.08% Clk2_Kin (S691) 0.87%	6.13814e+06	5.12211e+06	7.75704e+06	337178	3.02143e+06	1.1118e+06	1.19836	23.0058	2.71759	949.432	949.43	949.431	949.428	949.436		166.966	3	3	3	3	3		6.01838	4.86249	5.18221	2.50503	10.7789		4.8068	4.4319	4.6237	3.9834	4.2953		166.966	142.243	166.576	95.6478	83.1104
822964	CLIP-115 protein [Rattus norvegicus]	R.KIS*GTTALQEALK.E	S353	2.11842	5.0195	2792009	Q9UDT6	1568	395838		3.35272e+06	910454	168987	1.4484e+06	2.19021e+06	1.39097e+06	3.68247	0.116671	1.5746	720.38	720.381		720.384	720.392		51.1501	2	2		2	2		2.11842	2.28511		6.77891	17.8014		5.0195	4.1712		4.2575	3.7084		51.1501	22.6067		44.9354	32.342
825753	CLIP-170 [Rattus norvegicus]	K.TAS*ESISNLSEAGSVK.K	S192	6.06715	3.1183	8247352			395838		3.20759e+06	7.25509e+06	1.44344e+06	3.20219e+06	1.12169e+06	30900.7	0.442115	0.450765	36.2999				830.382			-0.724243				2						6.06715						3.1183
825681	CLIP-170 [Rattus norvegicus]	K.TASES*ISNLSEAGSVK.K	S194	0.331376	5.1288	8247352			395838		3935995	7.23501e+06	1.43989e+06	3.20219e+06	1975736	259038	0.54402	0.449658	7.62721	830.382	830.384	830.384	830.381			32.1312	2	2	2	2			5.99485	7.61556	8.5675	4.00662			5.1288	5.0038	4.1764	4.6835			32.1312	32.1312	24.1234	32.1312
826031	CLIP-170 [Rattus norvegicus]	K.TASES*ISNLS*EAGSVK.K	S194S199	4.02363	4.2049	8247352			395838		121022	1.58106e+06	2.66078e+06	2.12232e+06	42844.5	68639.6	0.076545	1.25371	0.624195			870.364				12.2265			2						4.02363						4.2049						12.2265
827452	CLIP-170 [Rattus norvegicus]	K.TASES*ISNLSEAGS*VK.K	S194S203	3.1097	4.7905	8247352			395838	PKC_common (S203) 0.07%	433862	1.05912e+06	407695	1.16134e+06	153861	118254	0.409645	0.351057	1.3011	870.363						28.1036	2						3.1097						4.7905						28.1036
825789	CLIP-170 [Rattus norvegicus]	K.TASESIS*NLS*EAGSVK.K	S196S199	3.39135	4.1811	8247352			395838		411412	1.56439e+06	2.56605e+06	1.8336e+06	500256	122976	0.262987	1.39946	4.06793			870.363				18.1739			2						3.39135						4.1811						18.1739
822949	CLIP-170 [Rattus norvegicus]	K.TASESISNLS*EAGSVK.K	S199	0.843503	4.9861	8247352			395838		3.15386e+06	7.23501e+06	1.14439e+06	5.21879e+06	1.98122e+06	528028	0.435917	0.219284	3.7521	830.377	830.38			830.39		34.3832	2	2			2		0.843503	3.71742			14.9659		2.784	4.9861			3.4086		18.8106	34.3832			12.9226
822958	CLIP-170 [Rattus norvegicus]	K.TASESISNLS*EAGS*VK.K	S199S203	0.0229923	6.0878	8247352			395838	PKC_common (S203) 0.07%	479247	1.56439e+06	2.66078e+06	2.17461e+06	489144	139712	0.306348	1.22356	3.5011	870.363	870.367	870.364		870.356		75.5374	2	2	2		2		3.2534	7.17929	4.16159		5.51818		4.9367	5.662	6.0878		4.2904		60.4775	75.5374	70.5365		43.7809
824378	CLIP-170 [Rattus norvegicus]	K.TASESISNLSEAGS*VK.K	S203	0.475976	5.84	8247352			395838	PKC_common (S203) 0.07%	2.99192e+06	7.27007e+06	748989	5.22647e+06	1.96437e+06	335128	0.41154	0.143307	5.86154	830.38	830.382	830.382	830.381	830.386		110.417	2	2	2	2	2		3.3499	5.99485	5.10919	4.66936	10.7003		5.84	4.9303	4.9844	5.6158	5.1721		110.417	80.4819	102.3	102.3	102.3
822759	CLIP-associating protein CLASP2 [Rattus norvegicus]	R.SRS*DIDVNAAAGAK.A	S376*	1.16865	6.1009	13508651	O75122	12054	400248		2.17961e+07	2.10304e+07	2.2685e+06	9.69465e+06	1.60388e+06	1.60032e+06	1.03641	0.233995	1.00223	727.839	727.837			727.841	727.839	38.3626	2	2			2	2	4.44087	2.00733			8.04991	4.52336	6.1009	5.7871			5.6971	5.971	38.3626	25.4218			29.0327
827788	cMG1 protein (AA 1-338) [Rattus norvegicus]	R.LS*ISDD.-	S334	1.79631	1.6214	55961	Q07352	3041	417108		1.18661e+07	964261	5.03706e+06	6.17369e+06	2.51848e+06	5.37739e+06	12.3059	0.815891	0.468346			729.272	729.272			32.5648			1	1					2.53678	1.79631					1.5758	1.6214					32.5648	32.5648
824691	cMG1 protein (AA 1-338) [Rattus norvegicus]	R.LSIS*DD.-	S336	2.37223	1.997	55961	Q07352	3041	417108	PDZ_class1 (S336) 00%	3.44774e+06	1.31751e+06	2.59705e+06	6.635e+06	1.80215e+06	2.13439e+06	2.61686	0.391417	0.844339				729.273		729.278	35.5806				1		1				3.71603		10.7504				1.997		1.5566				35.5806
825155	coactosin-like 1 (Dictyostelium) (predicted), isoform CRA_a [Rattus norvegicus]	K.AGGANYDAQS*E.-	S141	2.77873	3.4388	149038324	Q9CQI6		404304		2.58834e+06	4.83497e+06	216900	852588	7728.17	ND	0.535337	0.254401	7728.17	1162.41	1162.41		1162.41			75.8541	1	1		1			8.25007	6.57254		4.46486			3.4388	3.1468		3.4073			75.8541	59.7488		56.1692
825246	coactosin-like 1 (Dictyostelium) (predicted), isoform CRA_a [Rattus norvegicus]	K.AGGANYDAQS*E.-	S141	1.15278	3.0682	149038324	Q9CQI6		404304		ND	20326.1	598786	962653	ND	ND	4.91979e-05	0.622016	1			581.709	581.708			87.5839			2	2					4.40464	4.19818					2.3765	3.0682					87.5839	87.5839
823736	coenzyme Q9 homolog (yeast), isoform CRA_a [Mus musculus] [MASS=30290]	R.YTDQS*GEEEEDYESEEQLQHR.I	S81	0.0298394	5.7116	148679200					2.75632e+07	2.3305e+07	1.89123e+07	4.44116e+07	6.22953e+06	1.55337e+07	1.18272	0.425841	0.401034	894.35	894.349	894.346	894.347	894.352	894.344	82.6354	3	3	3	3	3	3	7.06444	5.97158	2.6557	4.14766	9.86557	0.645277	4.6585	4.3313	5.4015	5.1137	4.9701	5.7116	58.497	76.5025	82.6354	82.6354	72.1659
822051	cofactor of BRCA1 [Rattus norvegicus]	R.KPS*PPQAAETPALELPLPSVPAPAAL.-	S557	0.934761	4.3572	165377254			400431		4.5053e+06	1.60001e+06	1.34713e+07	3.25961e+07	1.28379e+07	2.75897e+07	2.81579	0.413279	0.465316	881.475	881.477	881.467	881.467	881.478	881.481	37.0638	3	3	3	3	3	3	10.1801	12.3675	1.07479	0.934761	13.4082	16.3864	4.3572	4.0346	4.0495	4.1143	4.0198	4.1062	24.2983	35.5847	3.68027	21.9264	31.3535
822993	cofactor of BRCA1 [Rattus norvegicus]	R.KPS*PPQAAETPALELPLPSVPAPAAL.-	S557	0.0832581	5.5961	165377254			400431		1.07314e+06	520892	9.33467e+06	2.36005e+07	1.25789e+07	65807.9	2.06019	0.395529	191.145	1321.71	1321.7	1321.7	1321.7	1321.72		80.571	2	2	2	2	2		11.357	0.0832581	5.8129	0.098396	18.5624		5.4723	5.3217	5.3978	5.5961	5.3614		55.0797	69.3933	80.571	73.9607	56.5208
827883	cofactor of BRCA1 [Rattus norvegicus]	R.KPSPPQAAET*PALELPLPSVPAPAAL.-	T564	11.3154	3.4145	165377254			400431		35456.4	54152.8	856245	1.11021e+06	1126.57	1687.4	0.654747	0.771248	0.667635			1321.71				9.68284			2						11.3154						3.4145						9.68284
828138	cofilin [Rattus norvegicus]	K.LGGS*AVISLEGKPL.-	S156	5.12405	3.1176	509201	Q5E9F7	3261			9803.4	ND	228845	112114	82494.3	28437.2	9803.4	2.04118	2.90093			710.88				42.2714			2						5.12405						3.1176						42.2714
824359	coiled-coil domain containing 102A [Rattus norvegicus]	R.S*PGSQELDLVESLLK.S	S190	5.98886	3.4891	157823107					ND	221902	1.64724e+06	4.37143e+07	2.91928e+07	1.48631e+07	4.50648e-06	0.037682	1.96411			565.605	565.605	565.61		7.53501			3	3	3				15.2348	15.2348	5.98886				3.0963	3.4891	2.8925				7.53501	5.7682	5.68636
822462	Coiled-coil domain containing 55 [Rattus norvegicus]	R.VLQKPSVFGNDS*DDDEASVSESLQR.E	S33	0.742261	5.6892	71051820			409746		454885	264757	4.41749e+06	95107.4	2.128e+06	134673	1.71812	46.4474	15.8013	934.76	934.766	934.753	934.756	934.769		50.4436	3	3	3	3	3		6.58396	13.4854	1.02061	2.30172	16.8148		4.7945	5.255	5.6892	5.2318	5.4838		30.5657	35.9908	33.4034	33.7066	50.4436
823254	coiled-coil domain containing 97 [Rattus norvegicus]	R.S*GSPGTPAYPLSDLLFQSYQER.E	S210	3.22886	3.6805	157819587			407071		75715.9	ND	1.35766e+06	758143	2.07386e+06	9215.73	75715.9	1.79077	225.035					1247.07		10					2						3.22886						3.6805						10
824178	coiled-coil domain containing 97 [Rattus norvegicus]	R.S*GSPGTPAYPLSDLLFQSYQER.E	S210	17.0024	4.1717	157819587			407071		9600.67	ND	13460.5	2.74532e+06	730113	3962.03	9600.67	0.00490307	184.277					831.73		15.8537					3						17.0024						4.1717						15.8537
823255	coiled-coil domain containing 97 [Rattus norvegicus]	R.SGSPGT*PAYPLSDLLFQSYQER.E	T215	1.58034	4.3151	157819587			407071	p38_Kin (T79) 0.3% Cdc2_Kin (T79) 0.35%	30096.3	ND	764271	2.77763e+06	735546	4592.7	30096.3	0.275152	160.155					831.717		4.11379					3						1.58034						4.3151						4.11379
827825	coiled-coil domain containing 97 [Rattus norvegicus]	R.SGSPGT*PAYPLSDLLFQSYQER.E	T215	1.75682	4.2104	157819587			407071	p38_Kin (T79) 0.3% Cdc2_Kin (T79) 0.35%	184292	55156.9	1.76982e+06	4.93469e+06	14851.5	22837	3.34123	0.358649	0.650327			1247.08				-0.222764			2						4.3038						4.2104
826673	Component of oligomeric golgi complex 3 (predicted) [Rattus norvegicus] [MASS=94246]	K.SGS*TDSLNPR.P	S533	0.978932	3.6597	53734407	Q8CI04		395235		7.25642e+06	399273	2.15325e+06	1.82663e+06	360852	542103	18.1741	1.17881	0.665653		557.233	557.233	557.234			21.214		2	2	2				2.07462	0.978932	3.1703				2.6781	3.6597	2.801				21.214	20.096
821895	copine III (predicted), isoform CRA_b [Rattus norvegicus] [MASS=59686]	R.S*SPVEFECINEK.K	S242	0.632154	3.5424	149045496	O75131	5016	398435		216627	1.12587e+06	920951	473546	1.42988e+06	2.28985e+06	0.192408	1.9448	0.624443	759.818	759.82	759.816	759.818	759.817	759.819	11.9498	2	2	2	2	2	2	7.32239	10.1341	3.7073	6.45319	5.63667	7.64505	3.289	3.5424	3.0124	2.7516	2.816	2.8968		9.54243		11.9498
824571	copine III (predicted), isoform CRA_b [Rattus norvegicus] [MASS=59686]	R.SS*PVEFECINEK.K	S243	0.888965	3.4063	149045496	O75131	5016	398435		1.26586e+06	1.26317e+06	812900	325665	1.39967e+06	2.28215e+06	1.00213	2.49612	0.613311			759.817	759.813		759.819	-0.315171			2	2		2			5.55107	0.888965		8.20476			3.4063	2.5039		3.3773
823997	Coproporphyrinogen oxidase [Rattus norvegicus] [MASS=49278]	R.SPS*PGRLEEDGDELAR.R	S101	0.702516	4.8392	78070754			396072		2.05649e+06	479971	2.70071e+06	3.70566e+06	221588	1.22044e+06	4.2846	0.728808	0.181563			603.267	603.266		603.274	35.1415			3	3		3			0.702516	1.93054		12.352			4.8392	4.0942		4.4447			35.0978	35.1415
822416	CORO1A protein [Rattus norvegicus]	R.RAT*PEPSSTLSSDTVSR.L	T418	2.25031	3.3143	16417360			406344	PKA_Kin (T418) 0.05%	143538	402163	6337.07	5947.75	831797	ND	0.356915	1.06546	831797	935.929	935.937			935.938		48.5184	2	2			2		2.25031	7.01814			7.34418		3.1496	3.3143			3.222		46.7575	48.5184			42.3872
826497	CORO1A protein [Rattus norvegicus]	R.AT*PEPSSTLSSDTVSR.L	T418	7.32462	3.2272	16417360			406344	PKA_Kin (T418) 0.05%	4.18572e+06	2.15794e+06	76642.4	54380.6	27397.7	413654	1.93968	1.40937	0.0662333		857.888					57.4957		2						8.60758						3.2272						57.4957
823087	coronin-like protein [Rattus norvegicus]	R.NVLS*DSKPAGYSR.S	S413	8.9707	2.5891	3757680	O89046		409388		217166	2.32314e+06	2.23092e+06	611592	1.8821e+06	1.55597e+06	0.0934795	3.64773	1.2096					737.347	737.351	44.9354					2	2					8.9707	14.2703					2.5544	2.5891					44.9354
821914	CPI17 [Rattus norvegicus]	K.QPGFPQPS*PSDDPSLSPR.Q	S128	1.5285	2.7	13625937	Q91VC7		407075	GSK3_Kin (S128) 0.08%	36873.3	1.48171e+06	1.14553e+06	1.1285e+06	5.24957e+06	402501	0.0248857	1.0151	13.0424			994.943		994.951		17.7936			2		2				1.5285		9.61841				2.2478		2.7				17.7936		13.9358
821905	CPI17 [Rattus norvegicus]	K.QPGFPQPSPSDDPSLS*PR.Q	S136	0.532964	4.7113	13625937	Q91VC7		407075	Erk1_Kin (S136) 0.63% GSK3_Kin (S136) 0.84%	3.74932e+06	9.66181e+06	5.64861e+06	3.66364e+06	1.49471e+07	3.15207e+07	0.388056	1.5418	0.474198	994.946	994.948	994.948	994.945	994.946	994.948	55.2084	2	2	2	2	2	2	4.89219	7.10447	6.79777	4.15811	4.89219	7.03911	3.8594	4.337	4.7113	4.1615	4.6487	4.4986	39.2689	55.2084	51.1501	51.1501	38.1697
821907	CPI17 [Rattus norvegicus]	K.QPGFPQPSPSDDPSLS*PR.Q	S136	4.54526	4.3479	13625937	Q91VC7		407075	Erk1_Kin (S136) 0.63% GSK3_Kin (S136) 0.84%	69037.1	140503	782971	252143	1.16791e+06	1.04244e+06	0.491358	3.10527	1.12036			663.633	663.635	663.633	663.642	9.81517			3	3	3	3			5.31453	7.52681	5.13353	18.8495			4.1266	4.3479	3.8986	3.9086			9.81517	5.70571	8.31129
824541	CPI17 [Rattus norvegicus]	R.GPGGS*PSGLQK.R	S26	1.39035	3.9817	13625937	Q91VC7		407075	Cdc2_Kin (S26) 0.81%	3.50963e+06	6.7619e+06	2.11574e+06	1.30632e+06	403147	667922	0.51903	1.61962	0.603585	532.743	532.744	532.743	532.743		532.749	26.0224	2	2	2	2		2	1.39035	2.53645	2.30159	2.30159		11.8179	3.9742	3.9817	3.8748	3.9516		3.5799	19.8227	26.0224	19.8227	22.4115
826393	CPI17 [Rattus norvegicus]	R.GPGGS*PSGLQK.R	S26	5.12925	2.2148	13625937	Q91VC7		407075	Cdc2_Kin (S26) 0.81%	280794	679221	ND	11977.3	26795.9	15778.3	0.413405	8.34911e-05	1.69827	1064.48	1064.48					19.8227	1	1					5.12925	5.81503					1.7347	2.2148					19.8227	19.8227
823395	CREB-binding protein [Rattus norvegicus] [MASS=265423]	K.EEEENSANGTASQSTS*PSQPR.K	S1077	6.80685	5.1601	38505359			414273		79058.6	341258	19688	17165.3	521027	398946	0.231668	1.14696	1.30601	762.649	762.65				762.648	19.8227	3	3				3	6.88997	8.14547				6.80685	4.0836	5.1601				4.9136	7.78151	19.8227
823455	CREB-binding protein [Rattus norvegicus] [MASS=265423]	K.EEEENSANGTASQSTS*PSQPR.K	S1077	9.45783	4.9324	38505359			414273		4232.77	45342.1	755.55	13275.5	78191.5	98307.2	0.0933521	0.056913	0.795379		1143.47				1143.48	36.1646		2				2		9.48408				17.0651		4.7687				4.9324		36.1646
824068	CREB-binding protein [Rattus norvegicus] [MASS=265423]	K.VEAKEEEENSANGTASQSTS*PSQPR.K	S1077	4.25701	5.748	38505359			414273		114280	24153.1	ND	3660.07	17693.5	85352	4.73149	0.000273218	0.2073						905.062	15.0014						3						4.25701						5.748
825035	CREB-binding protein [Rattus norvegicus] [MASS=265423]	K.WGLGLDDEGSSQGEPQSKS*PQESR.R	S1764*	4.2914	5.0686	38505359	Q92793	2534	414273	Cdk5_Kin (S1764) 0.46% Cdc2_Kin (S1764) 0.78%	312295	361711	91903.3	6084.35	705440	22577.7	0.863382	15.1049	31.245			885.388				10.9255			3						4.2914						5.0686						10.9255
822040	CREB-binding protein [Rattus norvegicus] [MASS=265423]	R.SIS*PSALQDLLR.T	S2064	2.22513	3.6526	38505359	Q92793	2534	414273		354472	515307	2.41961e+06	5.94703e+06	1.58955e+07	2.84186e+06	0.687885	0.40686	5.59332	690.353	690.356	690.354	690.353	690.356	690.36	35.1415	2	2	2	2	2	2	4.34877	8.15392	5.32	3.7327	8.77724	14.3508	3.1419	2.1182	3.6526	3.5355	3.6017	3.0216	35.1415	19.8691	22.833	25.4218	29.0327
822158	CRK-II [Rattus sp.] [MASS=33844]	R.QGS*GVILR.Q	S125	0.0109956	2.5058	1304191	P46108	1267	397716		2.03068e+07	2.11454e+07	8.974e+06	1.36475e+07	3.97602e+06	2.04263e+06	0.96034	0.657557	1.94652	455.233	455.232	455.231	455.233	455.233	455.236	100	2	2	2	2	2	2	2.69391	2.49599	0.252899	3.83745	4.10134	11.0175	2.2689	2.1819	2.337	2.5058	2.3501	2.4775	100	100	100	100	100
825211	CRK-II [Rattus sp.] [MASS=33844]	R.DS*STSPGDYVLSVSENSR.V	S40*	0.0959682	3.9861	1304191	P46108	1267	397716		8.54324e+06	2.94501e+06	587201	1.58052e+06	2.20041e+06	2.9114e+06	2.90092	0.371524	0.755792		990.42	990.415	990.418			12.9667		2	2	2				4.96001	0.0959682	2.49517				3.7844	2.6108	3.9861				8.01632	12.9667	12.2185
825292	CRK-II [Rattus sp.] [MASS=33844]	R.DSS*TSPGDYVLSVSENSR.V	S41*	2.53052	3.4295	1304191	P46108	1267	397716		8.51128e+06	1.06781e+07	2.19064e+06	1.58052e+06	82475.3	291831	0.797076	1.38603	0.282613			990.418				11.9498			2						2.53052						3.4295						11.9498
823375	CRK-II [Rattus sp.] [MASS=33844]	R.DSST*SPGDYVLSVSENSR.V	T42*	1.81834	4.5732	1304191	P46108	1267	397716		7.33986e+06	4.17629e+06	1.48327e+06	660603	2.24018e+06	2.91494e+06	1.75751	2.24533	0.768515		990.425		990.417		990.433	9.77724		2		2		2		9.76845		1.81834		18.4609		4.5732		3.8546		3.5331		9.0309
826577	CSG24 [Rattus norvegicus] [MASS=22219]	K.NLATS*ADTPPS*TIPGTGK.S	S111S117	4.5714	3.8824	61651596			408428		2.19706e+06	1.19906e+06	3.4562e+06	3.30076e+06	400792	1.84954e+06	1.83232	1.04709	0.216698	944.417		944.415				13.5297	2		2				7.35237		4.5714				3.5099		3.8824				13.5297		11.4833
823618	CSG24 [Rattus norvegicus] [MASS=22219]	K.NLATS*ADT*PPSTIPGTGK.S	S111T114	2.04999	4.3775	61651596			408428	Erk1_Kin (T114) 0.81%	2.18663e+06	1.20301e+06	3.4647e+06	3.30883e+06	403478	1.84954e+06	1.81763	1.04711	0.218151	944.419	944.421	944.415			944.426	16.9461	2	2	2			2	9.29108	11.4893	4.5714			16.7916	4.3775	3.7628	3.7595			3.7354	14.2037	14.9857	16.9461
823705	CSG24 [Rattus norvegicus] [MASS=22219]	K.NLATSADTPPS*T*IPGTGK.S	S117T118	1.72686	3.8801	61651596			408428	GSK3_Kin (T118) 0.84%	1.84018e+06	732340	2.38838e+06	2.59134e+06	371261	1.84621e+06	2.51274	0.921678	0.201094						944.412	9.43091						2						1.72686						3.8801
826621	CSG24 [Rattus norvegicus] [MASS=22219]	K.NLAT*SADT*PPSTIPGTGK.S	T110T114	3.98873	4.1074	61651596			408428	Erk1_Kin (T114) 0.81%	2.19706e+06	1.20777e+06	1.95434e+06	2.32514e+06	176446	1.84621e+06	1.8191	0.840528	0.0955721	944.416						17.465	2						5.6732						4.1074						17.465
826502	Csk binding protein Cbp [Rattus norvegicus]	R.SSSS*CNDLYATVK.D	S346	8.69265	2.868	7707799					1.10021e+06	1.48012e+06	288834	500631	78679	382753	0.743324	0.576939	0.205561		756.314					12.0862		2						8.69265						2.868						12.0862
822864	Csnk1a1 protein [Rattus norvegicus]	K.AAQQAAS*SSGQGQQAQTPTGK.Q	S311*	7.6275	3.8295	117558824	P67962	2739	417096		4112.62	7092.45	28421	53870.8	5681.87	ND	0.57986	0.527577	5681.87					694.652		23.9095					3						7.6275						3.8295						23.9095
823712	Csnk1a1 protein [Rattus norvegicus]	K.AAQQAASSSGQGQQAQT*PTGK.Q	T321*	14.5728	4.4163	117558824	P67962	2739	417096		ND	ND	9940.5	21344.6	9430.27	23003.6	1	0.465714	0.409947						694.657	9.73678						3						14.5728						4.4163
824698	CTD (carboxy-terminal domain, RNA polymerase II, polypeptide A) phosphatase, subunit 1 (predicted), isoform CRA_a [Rattus norvegicus] [MASS=105989]	R.DNS*PAVFPDR.H	S739	13.6533	2.832	149015915	Q7TSG2		407877		5.67774e+07	2.2331e+07	2.99351e+07	2.20417e+07	10160469	9155785	2.54253	1.35811	1.10973						599.262	100						2						19.4569						2.832
823569	CTD-binding SR-like [Rattus norvegicus]	R.FDIYDPFHPTDEAYS*PPPAPEQK.Y	S156*	0.474248	6.1129	9507017	-	11604	406949		750033	372067	1.64253e+06	4.72012e+06	3.61244e+06	2.49426e+06	2.01585	0.347986	1.4483	914.399		914.401	914.4	914.405	914.414	41.8699	3		3	3	3	3	0.474248		3.35985	2.15965	7.03706	16.6531	5.5588		5.7144	6.1129	5.1835	5.1682	35.3857		39.2689	41.8699	35.3857
823650	CTD-binding SR-like [Rattus norvegicus]	R.APS*PAPAVS*PK.G	S593S599	2.03131	3.6693	9507017			406949		4.56813e+06	1.47184e+06	2.8435e+06	2.93314e+06	430023	932492	3.10369	0.96944	0.461155		591.255				591.25	100		2				2		2.03131				6.441		2.786				3.6693		100
823410	CTD-binding SR-like protein rA8 [Rattus norvegicus]	K.ETVQTTQS*PAAVEK.E	S617	0.452598	4.2327	20806133			404704		2.70993e+06	3.63101e+06	311526	586206	150883	1.18789e+06	0.74633	0.531427	0.127017	784.867	784.865	784.866	784.865		784.871	14.6862	2	2	2	2		2	4.60883	1.80401	2.26936	1.57453		9.66383	4.0283	4.2327	3.1525	3.5948		4.1977	13.4324	12.3145	7.78151	14.6862
827034	CTD-binding SR-like protein rA8 [Rattus norvegicus]	K.TSEPVKETVQTTQS*PAAVEK.E	S617	4.06322	5.1842	20806133			404704		11218.4	6.11479e+06	530067	1.91524e+06	1.02561e+06	10312.5	0.00183463	0.276763	99.4532		737.364					51.5287		3						7.959						5.1842						51.5287
824546	CTD-binding SR-like protein rA8 [Rattus norvegicus]	K.ETVQTT*QSPAAVEK.E	T615	0.796827	3.6162	20806133			404704		2.70993e+06	3.6243e+06	311526	586206	153851	429623	0.747712	0.531427	0.358107	784.866	784.87		784.864		784.878	14.6862	2	2		2		2	2.65821	7.33076		0.796827		17.8359	3.6162	3.4051		3.1149		2.8901	4.58638	14.6862		3.52183
824642	CTP:phosphocholine cytidylyltransferase [Rattus norvegicus]	R.MLQALS*PK.Q	S315*	2.29464	3.0438	6164927	Q9Y5K3	5376	415155		2.03864e+07	2.03646e+07	5.38246e+06	4.6274e+06	1.67676e+06	4.47168e+06	1.00107	1.16317	0.374975	484.24	484.239				484.24	100	2	2				2	3.61768	3.55566				4.43423	3.0438	2.7012				2.4768	100	100
825858	Ctr9 protein [Rattus norvegicus] [MASS=55533]	R.RKGS*GS*EQEGEEEEGGER.K	S261S263	0.175374	5.2497	81294210			405096	PKA_Kin (S941) 0.76% PKC_epsilon (S941) 0.9%	311895	4.32025e+06	281519	790182	289109	3.3496e+06	0.0721937	0.356271	0.0863117	703.934	703.934	703.933	703.93			100	3	3	3	3			5.78731	5.03368	4.1663	0.175374			4.2407	4.8294	5.0342	5.2497			100	100	100	100
826327	Ctr9 protein [Rattus norvegicus] [MASS=55533]	R.KGS*GS*EQEGEEEEGGER.K	S261S263	0.337825	6.1336	81294210			405096	PKA_Kin (S941) 0.76% PKC_epsilon (S941) 0.9%	1.14714e+06	931094	6.51386e+06	6.77996e+06	216835	1.55665e+06	1.23203	0.960753	0.139296	977.347		977.342	977.342			100	2		2	2			6.27531		0.900866	1.02371			4.8532		6.1336	4.1965			100		100	100
827755	Ctr9 protein [Rattus norvegicus] [MASS=55533]	R.KGS*GS*EQEGEEEEGGER.K	S261S263	1.89386	6.5726	81294210			405096	PKA_Kin (S941) 0.76% PKC_epsilon (S941) 0.9%	938295	124839	2.84035e+06	2.48574e+06	24771.6	39233.3	7.51604	1.14266	0.631392			651.898	651.898			100			3	3					2.17538	1.89386					6.4003	6.5726					100	100
827888	Ctr9 protein [Rattus norvegicus] [MASS=55533]	K.GS*GS*EQEGEEEEGGER.K	S261S263	3.50025	5.2836	81294210			405096	PKA_Kin (S941) 0.76% PKC_epsilon (S941) 0.9%	342441	98910.1	2.00326e+06	865122	51827.4	1.08552e+06	3.46214	2.31558	0.0477444			913.297				100			2						3.63171						5.2836						100
827065	Ctr9 protein [Rattus norvegicus] [MASS=55533]	R.KGSGS*EQEGEEEEGGER.K	S263	3.71455	5.2938	81294210			405096		231234	551203	166941	18502.2	21561.3	168910	0.419508	9.02277	0.127649		625.245					2.23912		3						6.351						5.2938						2.23912
827626	Ctr9 protein [Rattus norvegicus] [MASS=55533]	K.AIISSSDDS*SDEDKLK.I	S340*	0.307301	3.7419	81294210	Q6PD62	6717	405096	Casn_Kin2 (S1020) 0.37%	956020	19789.5	6035.95	13181.4	7365.5	1.21253e+06	48.3093	0.457916	0.0060745	895.401						18.8106	2						11.6326						3.7419						18.8106
823126	Ctr9 protein [Rattus norvegicus] [MASS=55533]	K.AIISSSDDS*S*DEDKLK.I	S340S341*	0.240675	5.58	81294210	Q6PD62	6717	405096	Casn_Kin2 (S1021) 0.25% Casn_Kin2 (S1020) 0.37% DNA_PK (S1021) 0.83%	8.95699e+06	1.05508e+07	5.10291e+06	1.71044e+07	5.30265e+06	1.33847e+06	0.84894	0.298338	3.96172	935.377	935.376	935.376	935.373	935.385		65.9915	2	2	2	2	2		3.61546	2.63137	2.04841	0.663194	11.8411		4.6088	5.58	4.9326	3.4825	4.72		64.7851	64.4628	59.4415	28.9528	65.9915
827575	Ctr9 protein [Rattus norvegicus] [MASS=55533]	K.AIISSSDDSS*DEDKLK.I	S341*	9.17426	4.6176	81294210	Q6PD62	6717	405096	Casn_Kin2 (S1021) 0.25% DNA_PK (S1021) 0.83%	959609	19789.5	4424.12	26055	7203.87	423570	48.4907	0.169799	0.0170075	895.399						7.59668	2						9.17426						4.6176						7.59668
826091	Ctr9 protein [Rattus norvegicus] [MASS=55533]	K.IADEGHPRNS*NSDS*DDDERPNR.R	S357S361	0.496987	5.0009	81294210			405096	Casn_Kin2 (S1041) 0.1%	1.14769e+06	1.91478e+06	2.80441e+06	2.05845e+06	660850	577393	0.599383	1.36239	1.14454		886.009	886.009	886.008			46.7575		3	3	3				2.99697	2.37951	1.48343				3.1885	4.5407	5.0009				36.7575	20.5475	46.7575
826122	Ctr9 protein [Rattus norvegicus] [MASS=55533]	K.IADEGHPRNSNS*DS*DDDERPNR.R	S359S361	1.96535	5.3323	81294210			405096	Casn_Kin2 (S1041) 0.1%	1.01623e+06	1.91478e+06	2.80441e+06	2.05845e+06	660850	577393	0.530727	1.36239	1.14454		886.01	886.009	886.009			29.0722		3	3	3				3.41113	2.2402	2.10089				5.3323	4.6437	3.4191				29.0722	23.224	25.8927
826320	Ctr9 protein [Rattus norvegicus] [MASS=55533]	R.ASSESDS*DDNQNKSGSEAGS*PR.R	S377S390	4.05474	4.8282	81294210			405096	Cdk5_Kin (S1070) 0.03% Cdc2_Kin (S1070) 0.03%	18555.1	20957.2	333.775	ND	34353.1	ND	0.885377	333.775	34353.1	795.625	795.63					14.897	3	3					4.05474	9.58541					4.8282	4.663					10.847	14.897
827062	Ctr9 protein [Rattus norvegicus] [MASS=55533]	R.QESDEDS*DSDQPSR.K	S403	3.90545	2.9533	81294210			405096	Casn_Kin2 (S1083) 0.21%	11098.5	84528	57266.9	118945	3707.07	19465.8	0.1313	0.481458	0.19044		837.797		837.795			37.8415		2		2				5.65513		3.90545				2.9533		2.4392				8.84607		37.8415
826070	Ctr9 protein [Rattus norvegicus] [MASS=55533]	R.SGRQESDEDSDS*DQPSR.K	S405	4.47654	3.1721	81294210			405096		21158.1	106190	38841.9	58041.2	908758	3994.87	0.199247	0.669213	227.481		658.918					5.79317		3						4.47654						3.1721						5.79317
827720	Ctr9 protein [Rattus norvegicus] [MASS=55533]	R.S*GSEQSDNESAQSGR.S	S415	7.48173	2.7539	81294210			405096		ND	11477.8	ND	30086.4	13309.4	10032.3	8.71249e-05	3.32376e-05	1.32666				809.809			46.3548				2						7.48173						2.7539						46.3548
823564	Ctr9 protein [Rattus norvegicus] [MASS=55533]	K.KGGEFDEFVNDDT*DDDLPISK.K	T245*	1.11247	4.6595	81294210	Q6PD62	6717	405096	Casn_Kin2 (T925) 0.5%	585483	2215.2	1.6249e+07	410206	2446.13	3.06213e+06	264.303	39.6117	0.000798833	812.685	812.685	812.679	812.68		812.686	70.3377	3	3	3	3		3	10.8208	10.8208	4.42114	4.87269		12.3151	4.6595	4.0377	4.1187	3.5985		3.5848	67.0681	55.5429	64.9185	50.27
826998	Ctr9 protein [Rattus norvegicus] [MASS=55533]	K.GGEFDEFVNDDT*DDDLPISK.K	T245*	1.44286	5.4748	81294210	Q6PD62	6717	405096	Casn_Kin2 (T925) 0.5%	1.60231e+06	5.2432e+06	3.58911e+06	4.35505e+06	3.56088e+06	966971	0.305598	0.824126	3.68251	1154.48		1154.46	1154.47			132.77	2		2	2			17.8166		1.94981	3.53564			5.4748		4.9137	5.1351			61.5682		106.638	132.77
827164	Ctr9 protein [Rattus norvegicus] [MASS=55533]	K.KGGEFDEFVNDDT*DDDLPISK.K	T245*	0.558289	5.0873	81294210	Q6PD62	6717	405096	Casn_Kin2 (T925) 0.5%	236190	63439.1	2.9387e+06	2.63753e+06	7143.27	728363	3.7231	1.11419	0.00980729		1218.52	1218.52	1218.51			142.03		2	2	2				7.94735	4.25283	2.20031				5.0335	5.0618	5.0873				80.4904	142.03	113.041
824614	cullin 4B (predicted) [Rattus norvegicus] [MASS=110811]	R.DSAS*PSTSSFCLGVPVATSSHVPIQK.K	S151	0.167928	3.6881	149060051			396542		2843.62	380936	1.98432e+06	383039	222059	1268551	0.00746484	5.18046	0.175049		913.772	913.765	913.767		913.763	20.5811		3	3	3		3		11.8497	3.81852	6.00887		1.25581		2.5802	3.6746	3.6881		2.7976			20.5811	13.8561
822041	cullin 4B (predicted) [Rattus norvegicus] [MASS=110811]	R.SATDGNTSTT*PPTSAK.K	T106*	3.04514	3.9772	149060051	Q13620	2251	396542		ND	76804.4	10808.5	59024.1	153704	72661.9	1.30201e-05	0.183121	2.11533					808.348		13.8917					2						3.04514						3.9772						13.8917
827731	cyclin ania-6a [Rattus norvegicus]	K.GLNLDGTPALSTLGGFS*PAS*KPS*SPR.E	S336S339S342	2.20799	5.3066	5579444			401726		879681	386136	546190	3.13928e+06	44218.2	19037.1	2.27817	0.173986	2.32273				923.078			12.2483				3						2.20799						5.3066						12.2483
824160	cyclin ania-6a [Rattus norvegicus]	K.GLNLDGTPALSTLGGFS*PASKPSS*PR.E	S336S343	0.621453	5.2789	5579444			401726	Cdc2_Kin (S347) 0.31% Cdk5_Kin (S347) 0.56%	2.27139e+06	822976	5.41053e+06	9.22707e+06	2.6931e+06	1.84483e+06	2.75998	0.586376	1.45981	896.435			896.421	896.427		11.581	3			3	3		15.7482			0.621453	7.09643		4.8685			5.2789	5.1492		5.61692			10.4685	11.581
823331	cyclin ania-6a [Rattus norvegicus]	K.AEEKS*PVSINVK.T	S353	2.5712	4.365	5579444			401726		ND	3.48577e+07	ND	22438.6	8.62068e+06	1462.3	2.86881e-08	4.45661e-05	5895.29		690.846			690.846		43.4475		2			2			6.01875			5.66386			4.066			4.365			43.4475			32.2792
823332	cyclin ania-6a [Rattus norvegicus]	K.AEEKS*PVSINVK.T	S353	0.0217285	3.4838	5579444			401726		86757.7	1.62942e+07	1.37327e+07	6.43271e+06	916176	3259548	0.00532445	2.13482	0.281075		460.898	460.898	460.897	460.899	460.9	83.4708		3	3	3	3	3		2.69432	1.03572	0.0217285	4.88164	5.47554		3.4838	3.0162	2.9415	2.6934	3.2814		76.6883	82.2844	83.4708	83.4708
824138	cyclin L2, isoform CRA_c [Rattus norvegicus] [MASS=57928]	K.AKGDS*PVNGLLK.G	S366	1.50159	3.3793	149024833			405900		58293.8	22344.3	5.02158e+06	3.49289e+06	1.4298e+06	386754	2.60889	1.43766	3.69693			639.827		639.836	639.837	100			2		2	2			1.50159		15.7273	17.2602			3.3393		3.3456	3.3793			100		100
827349	cyclin-dependent kinase 6 [Rattus norvegicus] [MASS=57174]	K.DNLHSHLSSSQS*TSELNTA.-	S512	1.32834	4.0631	34854317			400269		946374	519135	ND	31848.2	ND	221339	1.82298	3.13989e-05	4.51795e-06	1054.46						29.7221	2						11.4805						4.0631						29.7221
823291	cyclin-dependent kinase 7 (MO15 homolog, Xenopus laevis, cdk-activating kinase) [Rattus norvegicus] [MASS=39043]	R.AYT*HQVVTR.W	T170*	0.355121	3.3964	34853514	P50613	15993	405684		1.08916e+06	17131.2	3.05093e+06	1.92643e+06	2719678	2.16618e+06	63.5778	1.58372	1.25552	577.772		577.772	577.772	577.775		30.193	2		2	2	2		0.675596		0.779534	0.996071	6.80789		3.3964		3.1204	3.3326	3.2346		30.193		30.193	27.6042	30.193
822985	cystathionine gamma-lyase [Rattus norvegicus]	R.AVVLPISLATTFKQDS*PGQSSGFVYSR.S	S50	0.981106	6.7609	443705	P18757		401302		80510.2	285647	2.23163e+06	916084	2.16892e+07	5.45935e+06	0.281852	2.43605	3.97286	979.174		979.165	979.162	979.165	979.174	63.7954	3		3	3	3	3	15.9734		6.43507	3.91079	7.03122	15.9495	3.8998		4.9488	5.0012	6.7609	6.2738	11.04		43.8821	40.2363	63.7954
821848	cystathionine gamma-lyase. [Rattus norvegicus]	K.QDS*PGQSSGFVYSR.S	S16	0.244567	4.4601	56030	P18757		401302		5.49528e+07	4.52717e+07	7401709	4.20349e+07	7.22225e+07	7.42616e+07	1.21385	0.176085	0.972543	797.831	797.833	797.834	797.833	797.837	797.841	83.2797	2	2	2	2	2	2	1.3169	2.92853	4.38338	3.76883	7.82609	13.5639	4.0543	3.8288	3.9371	4.4601	3.891	3.8816	67.4031	80.3839	74.6175	83.2797	67.4031
825728	cystathionine gamma-lyase. [Rattus norvegicus]	K.QDS*PGQSSGFVYSR.S	S16	4.88505	1.9474	56030	P18757		401302		551518	86986.6	914653	1.92706e+06	238518	64710.6	6.34026	0.474635	3.68592			1594.67	1594.67			64.4284			1	1					10.3971	8.10201					1.9474	1.8696					64.4284	46.9024
823030	cystathionine gamma-lyase. [Rattus norvegicus]	R.FLES*NPR.V	S247	0.519945	2.4538	56030	P18757		401302		2.75704e+06	2.84416e+06	3.18782e+06	9.50165e+06	1.99954e+06	1.04904e+06	0.969369	0.335502	1.90606		471.709	471.709	471.709	471.714	471.712	100		2	2	2	2	2		3.69265	3.30005	3.81999	13.8579	9.45441		2.2495	2.1338	2.2652	2.4538	2.1001		100	100	100	100
825840	cystathionine gamma-lyase. [Rattus norvegicus]	K.ISFVDCSKT*K.L	T105	0.529826	3.3372	56030	Q8VCN5		401302		3.47372e+06	2.84441e+06	656378	1.34461e+06	25091	25760.3	1.22124	0.488154	0.974017	632.787	632.786	632.789	632.789			42.4279	2	2	2	2			1.39969	0.917311	5.64618	4.68143			3.1844	3.0557	3.1821	3.3372			26.0224	25.8003	32.342	42.4279
827434	cystathionine gamma-lyase. [Rattus norvegicus]	K.QDSPGQSSGFVY*SR.S	Y25	0.244567	3.2213	56030	P18757		401302		8.8535e+06	6.11407e+06	2.63848e+06	9.65685e+06	4.21655e+06	1.28283e+06	1.44805	0.273224	3.28692	797.831						33.8039	2						1.24165						3.2213						33.8039
822204	cysteine rich protein 1; cysteine rich protein [Rattus norvegicus]	K.GFGFGQGAGALVHS*E.-	S192	3.07204	5.2156	8393206	P21291	470	400010		99886.7	391653	2.73429e+06	7.73014e+06	1.41631e+06	1.01567e+06	0.255039	0.353718	1.39447			757.331	757.331	757.33	757.342	100			2	2	2	2			5.49002	4.84919	3.87804	19.6872			4.8983	5.2156	5.0272	4.5752			100	100	100
823794	cysteine string protein; CSP [Rattus sp.]	R.SLS*TSGESLYHVLGLDK.N	S10*	2.49218	4.1613	1438835	O42196	8539	403663	Akt_Kin (S10) 0.21% 1433_m1 (S10) 0.6%	ND	285848	2.12683e+06	1.23671e+06	15603.1	758518	3.49837e-06	1.71974	0.0205705				943.454		943.458	-0.268721				2		2				3.77008		7.52423				4.1613		3.4931
825601	cysteine string protein; CSP [Rattus sp.]	R.S*LSTSGESLYHVLGLDK.N	S8*	0.668118	4.0397	1438835	O42196	8539	403663	Cam_Kin2 (S8) 0.06%	ND	247984	502626	1.23671e+06	11452.9	760684	4.03251e-06	0.40642	0.015056			943.451	943.453			12.2185			2	2					0.668118	2.34901					3.1171	4.0397					12.2185	9.20819
821879	cysteinyl-tRNA synthetase (predicted), isoform CRA_a [Rattus norvegicus] [MASS=94878]	R.VQPQWS*PPAGTEPCR.L	S102	1.02248	3.8088	149061783	Q9ER72		407080		806517	429947	362867	395778	1.07504e+06	40086.9	1.87585	0.916844	26.8177			895.392		895.402		16.9218			2		2				2.45841		13.1635				2.5396		3.8088				9.04295		16.9218
823442	cysteinyl-tRNA synthetase (predicted), isoform CRA_a [Rattus norvegicus] [MASS=94878]	K.ALQEGEGDLSIS*ADR.L	S390	0.585111	4.6009	149061783	P49589	464	407080		435303	144629	398005	186497	225582	780419	3.0098	2.1341	0.289052	820.864		820.867			820.874	51.1501	2		2			2	2.83412		6.4057			15.4077	4.1497		4.6009			3.8077	44.6853		51.1501
822188	cytoplasmic polyadenylation element binding protein 4 (predicted) [Rattus norvegicus] [MASS=79144]	K.QQLS*PSPGQEAGILPETEK.A	S97	3.50887	4.2587	149052215	Q17RY0	16746	411642		258992	948263	929727	1.03956e+06	1.78368e+06	388280	0.273122	0.894346	4.59378			1045		1045.01		19.8227			2		2				3.50887		8.99951				3.2704		4.2587				19.8227		19.0849
821921	cytoplasmic polyadenylation element binding protein 4 (predicted) [Rattus norvegicus] [MASS=79144]	K.QQLSPS*PGQEAGILPETEK.A	S99	4.32265	5.0645	149052215	Q17RY0	16746	411642		719999	1.26892e+06	1.06869e+06	1.03703e+06	2.20602e+06	1.69618e+06	0.56741	1.03053	1.30059	1045.01		1045	1045	1045		53.8485	2		2	2	2		9.11439		5.61035	5.02634	6.54381		2.9278		5.0645	4.4673	3.7142		44.6853		53.8485	44.6853	32.1312
828034	cytoplasmic polyadenylation element binding protein 4 (predicted) [Rattus norvegicus] [MASS=79144]	K.QQLSPS*PGQEAGILPETEK.A	S99	4.81571	3.6244	149052215	Q17RY0	16746	411642		120621	244156	581892	392439	656166	23643.4	0.494032	1.48276	27.7526			697.004	697.003			27.8076			3	3					5.69173	4.81571					3.6244	3.1506					17.1337	27.8076
825404	cytosolic 3-hydroxy 3-methylglutaryl coenzyme A synthase (AA 1-520) [Rattus norvegicus]	R.RPS*TNDHSLDEGVGLVHSNTATEHIPSPAK.K	S471*	1.37994	5.4029	55947	P17425		405022	PKA_Kin (S471) 0.39%	25927.2	626857	3.92334e+06	ND	ND	22342.8	0.0413606	3.92334e+06	4.47572e-05		1082.86	1082.85				19.0849		3	3					10.5743	1.37994					3.9732	5.4029					7.59668	19.0849
825194	cytosolic 3-hydroxy 3-methylglutaryl coenzyme A synthase (AA 1-520) [Rattus norvegicus]	R.LPATSGEPESAVIS*NGEH.-	S516	0.240024	3.8488	55947	P17425		405022		5696.8	126002	131060	1.27218e+06	48708.7	327835	0.0452119	0.10302	0.148577			937.903	937.91			35.3523			2	2					9.48368	2.0162					2.9383	3.8488					35.3523	33.224
823999	cytosolic malate dehydrogenase [Rattus norvegicus]	K.NVIIWGNHS*STQYPDVNHAK.V	S188	1.45334	5.1605	3747085	P40925	1100	399769		1.82459e+06	3.44351e+06	1.37195e+06	7.98277e+06	446901	1.72254e+06	0.529865	0.171864	0.259444	787.371	787.362	787.367	787.368		787.369	22.4115	3	3	3	3		3	6.38533	4.2075	1.68638	2.85159		5.02099	4.6935	4.8168	4.566	5.1605		4.16	11.3033	9.0759	22.4115	22.4115
827191	cytosolic malate dehydrogenase [Rattus norvegicus]	K.NVIIWGNHS*STQYPDVNHAK.V	S188	14.012	3.9099	3747085	P40925	1100	399769		499.575	1.29153e+06	68086.4	1.64341e+06	3428	26127.2	0.000386808	0.0414301	0.131204		1180.56					31.9863		2						14.012						3.9099						31.9863
824944	cytosolic malate dehydrogenase [Rattus norvegicus]	K.NVIIWGNHSS*TQYPDVNHAK.V	S189	1.61011	4.6138	3747085	P40925	1100	399769		1.81741e+06	3.43713e+06	1.06227e+06	7.98277e+06	464034	1.69989e+06	0.528757	0.133071	0.272978	787.375	787.371	787.368				10.8814	3	3	3				11.4698	7.23275	2.57194				3.4365	3.1375	4.6138				10.8814	6.76694	6.76694
827159	cytosolic malate dehydrogenase [Rattus norvegicus]	K.NVIIWGNHSS*TQYPDVNHAK.V	S189	7.23275	4.5844	3747085	P40925	1100	399769		2112.1	1.30131e+06	72565.5	1.64341e+06	3428	26127.2	0.00162305	0.0441556	0.131204		1180.56					10.7918		2						16.1305						4.5844						10.7918
824978	cytosolic malate dehydrogenase [Rattus norvegicus]	R.KLS*SAMSAAK.A	S241	0.186305	3.6642	3747085	P40925	1100	399769		3.95595e+06	5.68243e+06	4.41476e+06	5.46412e+07	1.10312e+07	2.35426e+07	0.696172	0.0807954	0.468562	537.259	537.258	537.258	537.258			27.6042	2	2	2	2			4.05213	3.37212	2.58032	1.891			3.3584	2.6739	3.5845	3.6642			23.8995	19.0849	27.6042	23.8995
825585	cytosolic malate dehydrogenase [Rattus norvegicus]	R.KLS*SAMSAAK.A	S241	1.50907	2.6996	3747085	P40925	1100	399769		ND	1.28565e+06	557148	5.46297e+06	189616	738764	7.77819e-07	0.101986	0.256667				1073.51			12.0862				1						1.50907						2.6996						12.0862
827174	cytosolic malate dehydrogenase [Rattus norvegicus]	K.NVIIWGNHSST*QYPDVNHAK.V	T190	7.03784	4.4794	3747085	P40925	1100	399769		1.80348e+06	3.40655e+06	1.38834e+06	7.98277e+06	286929	1.70959e+06	0.529414	0.173917	0.167835	787.374	787.371					4.77121	3	3					10.1987	7.03784					3.2188	4.4794					4.77121	4.58638
826158	cytospin A [Rattus norvegicus]	R.KGS*SGNASEVSVACLTER.I	S385	5.8648	3.9159	62484085	Q69YQ0	11080	395877	Akt_Kin (S43) 0.42% PKA_Kin (S43) 0.94%	631309	241409	9.23313e+06	1.29478e+07	429218	484217	2.6151	0.713103	0.886417	966.436						33.8917	2						5.8648						3.9159						33.8917
822243	cytotoxic T lymphocyte-associated protein 2 alpha [Rattus norvegicus]	K.NSSLT*PERDQPE.-	T106	0.819221	3.7398	157819701					9.79805e+06	1.95616e+07	3.13647e+06	5.65112e+06	8.65248e+06	2.30218e+06	0.500882	0.555018	3.75838	726.808	726.808	726.805	726.806	726.806	726.808	55.2084	2	2	2	2	2	2	6.49176	5.89973	1.94823	2.45766	2.45766	5.4798	3.5797	3.7398	3.5605	3.5918	3.6885	3.4426	51.1501	55.2084	51.1501	51.1501	47.7991
826477	cytotoxic T lymphocyte-associated protein 2 alpha [Rattus norvegicus]	K.NSSLT*PERDQPE.-	T106	10.4088	2.0158	157819701					613513	1.26109e+06	2849.72	ND	24301.9	ND	0.486494	2849.72	24301.9		1452.62					22.4677		1						10.4088						2.0158						22.4677
821890	D-3-phosphoglycerate dehydrogenase [Rattus norvegicus]	R.AGT*GVDNVDLEAATR.K	T78	2.19928	5.3828	1944614	Q5EAD2	6047	406189		1.67679e+06	632226	721689	952250	2.45102e+06	398251	2.6522	0.757878	6.15447		784.857	784.853	784.856	784.862		233.095		2	2	2	2			7.17789	2.19928	6.55317	13.7883			5.2219	5.0641	5.3828	5.1092			233.095	233.095	212.435	165.758
822967	D4, zinc and double PHD fingers family 2 (predicted) [Rattus norvegicus] [MASS=44215]	R.VDDDS*LGEFPVTNSR.A	S142*	1.31159	5.317	149062118	Q92785	3394	407210		1.95171e+06	2.14928e+06	2.81038e+06	5.80361e+06	2.70134e+06	1.73521e+06	0.908077	0.484247	1.55678	865.875	865.879	865.872	865.872	865.869	865.88	123.807	2	2	2	2	2	2	9.07125	14.1499	5.89922	5.96855	2.65206	15.2073	5.317	5.1753	4.6228	5.0501	4.7914	4.5694	102.854	123.807	120.961	102.854	100.44
822472	dC-stretch binding protein (CSBP) [Rattus norvegicus]	K.IIPTLEEGLQLPS*PTATSQLPLESDAVECLNYQHYK.G	S116*	1.42201	5.3254	409389	P61978	2834	406076		81665.8	23424.4	495285	5.37327e+06	1.12779e+06	16547.4	3.48636	0.0921758	68.1552		1379.02	1379.01	1379.01	1379.03		7.32394		3	3	3	3			10.486	2.63119	1.42201	16.2416			5.3254	4.9275	4.8584	4.8167			5.00602	7.31499	7.32394	3.45234
822496	dC-stretch binding protein (CSBP) [Rattus norvegicus]	R.DYDDMS*PR.R	S284*	0.213288	2.0533	409389	P61978	2834	406076	Cdc2_Kin (S284) 0.39% Cdk5_Kin (S284) 0.4%	1.44288e+07	1.33855e+07	1.02769e+06	3.24539e+06	6.1574e+07	6.12153e+06	1.07795	0.316662	10.0586	1078.36	1078.37		1078.36	1078.37	1078.36	76.1188	1	1		1	1	1	2.50381	11.5638		6.58406	13.5946	8.84673	2.0279	2.0533		1.875	1.9696	1.8163	76.1188	52.0794		62.128	62.128
823029	dC-stretch binding protein (CSBP) [Rattus norvegicus]	R.DYDDMS*PR.R	S284*	0.176194	2.9104	409389	P61978	2834	406076	Cdc2_Kin (S284) 0.39% Cdk5_Kin (S284) 0.4%	1.15599e+07	1.75446e+07	4.50823e+06	8.66828e+06	3.698e+07	2.89737e+06	0.658885	0.520084	12.7633	539.681	539.682	539.683	539.683	539.685	539.683	135.216	2	2	2	2	2	2	0.510036	2.09578	3.7928	3.33841	7.75249	4.02463	2.6688	2.9104	2.5668	2.5531	2.535	2.357	135.216	120.772	110.417	109.283	87.5839
823060	dC-stretch binding protein (CSBP) [Rattus norvegicus]	R.RDYDDMS*PR.R	S284*	8.98363	2.4189	409389	P61978	2834	406076	Cdc2_Kin (S284) 0.39% Cdk5_Kin (S284) 0.4%	37021.9	22032.5	ND	ND	413244	ND	1.68034	1	413244					1234.47		109.371					1						8.98363						2.4189						109.371
823062	dC-stretch binding protein (CSBP) [Rattus norvegicus]	R.RDYDDMS*PR.R	S284*	0.315929	2.0856	409389	P61978	2834	406076	Cdc2_Kin (S284) 0.39% Cdk5_Kin (S284) 0.4%	7.71642e+06	5.91409e+06	1.35219e+06	1.41149e+06	2.84076e+07	10536.4	1.30475	0.95799	2696.13		617.732	617.734		617.735		87.5839		2	2		2			0.315929	3.97745		6.15652			2.0856	2.0026		2.0756			87.5839	65.2179		80.4819
824158	dC-stretch binding protein (CSBP) [Rattus norvegicus]	R.GS*YGDLGGPIITTQVTIPK.D	S379*	1.02654	4.961	409389	P61978	2834	406076		3.1279e+06	783418	1.32306e+06	1.13751e+06	464284	1.35563e+06	3.99264	1.16312	0.342486	999.011		999.005		999.021		71.2905	2		2		2		7.87175		1.63745		17.7713		4.6819		4.961		3.6222		53.5161		71.2905		57.0769
822370	dC-stretch binding protein (CSBP) [Rattus norvegicus]	K.IIPTLEEGLQLPSPT*ATSQLPLESDAVECLNYQHYK.G	T118*	1.38332	5.4233	409389	P61978	2834	406076		641443	1.10807e+06	3.38402e+06	5.37327e+06	5.73503e+06	279214	0.578884	0.629788	20.5399	1379.02			1379.01	1379.03		7.32394	3			3	3		9.86448			2.33857	15.7096		5.4233			4.3489	5.2323		2.26648			2.26648	7.32394
824810	D-dopachrome tautomerase [Rattus norvegicus]	R.SHSS*SFFK.F	S79	0.556437	2.4635	895882	P80254		395831		1.74309e+06	71541.5	1.08884e+06	585655	ND	4279.57	24.3648	1.85918	0.000233669	503.707		503.705	503.706			33.8039	2		2	2			3.40817		0.556437	1.16255			2.4472		2.4635	2.2739			6.53213		33.8039	13.8917
821971	D-dopachrome tautomerase [Rattus norvegicus]	K.FLTEELS*LDQDR.I	S90	0.336421	5.436	895882	O35215		395831	ATM_Kin (S90) 0.71%	856992	1.86301e+06	3.21265e+06	3.27159e+06	2.56507e+06	9.21922e+06	0.460003	0.981984	0.278231	773.351	773.354	773.349	773.349	773.346	773.357	76.7252	2	2	2	2	2	2	7.20712	10.843	5.2339	4.83926	1.12571	15.6627	3.867	4.7062	5.436	4.884	4.8135	4.6406	71.6986	65.1895	71.6986	76.7252	71.6986
823005	DEAD (Asp-Glu-Ala-Asp) box polypeptide 21 [Rattus norvegicus]	K.AEEPS*EEEADAPKPK.K	S119	0.193354	4.2669	77748254					3080653	1.13663e+06	173083	2.6923e+06	1.26617e+06	1.82328e+06	2.71034	0.0642882	0.694447	853.867	853.866		853.866	853.868	853.865	100	2	2		2	2	2	6.05252	4.76351		4.83382	7.48215	4.6932	4.0164	4.2669		4.1826	3.6686	3.9076	100	100		100	100
823557	DEAD (Asp-Glu-Ala-Asp) box polypeptide 42 (predicted) [Rattus norvegicus] [MASS=102066]	R.YMAENPTAGVVQEEEEDNLEYDS*DGNPIAPSKK.I	S185	0.33337	6.5161	149054552			400456		48469.5	822236	6.36483e+06	9.82922e+06	3.01634e+06	3.06885e+06	0.0589484	0.647541	0.982889			1240.54	1240.54		1240.56	28.431			3	3		3			6.6566	3.43047		15.7461			5.5974	6.5161		5.7222			13.8142	28.431
826410	DEAD box polypeptide 24 [Rattus norvegicus]	K.AQAVS*EEEEEEEGESSSPK.K	S80	4.73993	5.8858	33638101			400120	Casn_Kin2 (S80) 0.14%	10265.7	1.04883e+06	5440.12	9288.42	ND	5691.03	0.0097877	0.585689	0.000175715		1065.92					120.301		2						4.73993						5.8858						120.301
823159	DEAD/H (Asp-Glu-Ala-Asp/His) box polypeptide 16 [Rattus norvegicus]	K.LLEDS*ES*GEEAVAR.D	S103S105	0.13216	5.6728	46237659			414292	Casn_Kin2 (S105) 0.62% Casn_Kin2 (S103) 0.63%	9.26247e+06	8.09486e+06	2.06534e+07	2.19826e+07	4.45144e+06	2.24498e+07	1.14424	0.939533	0.198285	832.833	832.835	832.83	832.83	832.828	832.833	100	2	2	2	2	2	2	8.19387	9.95397	4.45739	4.82383	1.8142	8.41614	5.2558	5.0478	4.8163	5.6728	4.443	4.9219	100	100	100	100	100
824277	DEAD/H (Asp-Glu-Ala-Asp/His) box polypeptide 16 [Rattus norvegicus]	K.LLEDSES*GEEAVAR.D	S105	2.3033	5.7434	46237659			414292	Casn_Kin2 (S105) 0.62%	2.32808e+06	1.94051e+06	797019	1.44244e+06	588299	562597	1.19973	0.55255	1.04569	792.851	792.847			792.858		47.7991	2	2			2		9.62331	5.23132			19.4042		5.7434	5.5234			4.0493		47.7991	42.4279			11.3033
827036	DEAD/H (Asp-Glu-Ala-Asp/His) box polypeptide 16 [Rattus norvegicus]	K.TGGSKS*PTEEKPAS*EDEWER.T	S154S162	5.87827	4.9416	46237659			414292	Casn_Kin2 (S162) 0.44% Cdc2_Kin (S154) 0.87%	ND	3994746	ND	308439	507979	ND	2.50329e-07	3.24213e-06	507979		793.991					44.3151		3						8.07998						4.9416						44.3151
821903	death associated transcription factor 1 (predicted), isoform CRA_b [Rattus norvegicus] [MASS=229928]	R.GLS*PSYLGGPR.G	S1684	1.65604	2.8813	149034011	Q8BMD0		409032		141346	13405.3	378909	174091	735506	12810.3	10.544	2.1765	57.4153			592.282		592.278		32.1312			2		2				4.43579		1.65604				2.8813		2.7927				29.8287		32.1312
823376	death associated transcription factor 1 (predicted), isoform CRA_b [Rattus norvegicus] [MASS=229928]	R.S*PPEGDTTLFLSR.L	S878	12.7026	3.1966	149034011	Q9BTC0	10363	400515		19829	54499.4	202709	115835	407937	503793	0.363838	1.74998	0.809731						750.352	18.9706						2						12.7026						3.1966
826789	Death-associated kinase 2 (predicted) [Rattus norvegicus]	R.NCES*DTEENIAR.R	S194*	2.67534	4.6929	60551836	Q8VDF3		404941		2.16247e+06	2.18231e+06	3.05271e+06	2.64346e+06	531238	632228	0.990908	1.15482	0.840264	759.285		759.284				32.342	2		2				3.47926		2.67534				4.6929		3.4073				32.342		26.0224
824721	death-upregulated gene [Rattus norvegicus]	R.FVS*EGDGGR.L	S457*	0.767399	2.9188	21492650	Q53EL6	10549	403479	Akt_Kin (S457) 0.3% 1433_m1 (S457) 0.51%	804375	1.97156e+06	2.60242e+06	711158	662762	932970	0.407989	3.65941	0.710378	502.199		502.199	502.198		502.203	100	2		2	2		2	3.4483		1.92348	0.767399		10.8033	2.8795		2.7251	2.5035		2.9188	100		100	100
823421	death-upregulated gene [Rattus norvegicus]	R.SGVAVPTS*PK.G	S94	0.0489002	2.9311	21492650			403479	Cdk5_Kin (S94) 0.22% Cdc2_Kin (S94) 0.26% p38_Kin (S94) 0.83%	4.47866e+07	1.88324e+08	5.9278e+06	5.19574e+07	3191362	1.30005e+08	0.237817	0.11409	0.024548	511.751	511.751		511.75		511.752	23.8995	2	2		2		2	2.63082	3.41322		0.185821		4.48901	2.5299	2.9311		2.6766		2.5898	19.0849	23.8995		22.4677
826408	death-upregulated gene [Rattus norvegicus]	R.SGVAVPT*SPK.G	T93	0.547681	2.7825	21492650			403479		4.48398e+07	1.88569e+08	5.57085e+06	3.15177e+06	3.64648e+06	1.30527e+08	0.23779	1.76753	0.0279366	511.751	511.751	511.75	511.751			118.815	2	2	2	2			2.16138	2.1516	0.547681	3.28608			2.2697	2.7825	2.0057	2.1732			114.466	114.466	97.3464	118.815
822919	dedicator of cyto-kinesis 1 [Rattus norvegicus]	R.KQTS*VDSGIVQ.-	S1857	3.53581	3.2611	219804406	Q14185	3240	405902	Cam_Kin2 (S1858) 0.05% PKC_delta (S1858) 0.27%	4.38129e+06	6.15539e+06	4.84699e+06	4.19391e+06	974162	739293	0.711782	1.15572	1.31769			621.294		621.297		16.9461			2		2				3.53581		7.96561				2.3261		3.2611				7.03769		16.9461
827307	dedicator of cytokinesis 9 [Rattus norvegicus] [MASS=93516]	K.AEPYIAS*EYK.T	S375	6.28528	2.4524	149050244			411509		369751	1.77835e+06	50074.6	39121.9	278935	ND	0.207918	1.27996	278935		625.775					22.4115		2						6.28528						2.4524						22.4115
822226	delta-4-3-ketosteroid 5-beta-reductase [Rattus norvegicus]	R.NPLWVNVSS*PPLLK.D	S235	7.03828	3.2251	456303	P31210		402459		534728	ND	559397	2745.12	708041	1751.8	534728	203.778	404.179	822.445		822.437		822.44		33.8039	2		2		2		16.096		7.03828		9.78178		3.049		3.0876		3.2251		27.6042		30.193		33.8039
823308	delta-ALAD (AA 1-330) [Rattus norvegicus]	R.DAAQSS*PAFGDRR.C	S215	8.60301	2.6807	55626	Q60HH9		403681		4.2854e+06	1.24598e+06	2.46305e+06	906477	5.54017e+06	4.68257e+06	3.43939	2.71717	1.18315					729.318		13.8917					2						8.60301						2.6807						13.8917
824686	delta-ALAD (AA 1-330) [Rattus norvegicus]	R.DAAQSS*PAFGDR.R	S215	2.15902	3.3951	55626	Q60HH9		403681		4.90836e+06	3.1861e+06	4.10637e+06	2.17921e+06	978282	1.85507e+06	1.54055	1.88433	0.527355	651.265		651.263			651.27	33.8039	2		2			2	4.8789		2.7199			12.5698	2.82		2.7099			3.3951	33.8039		33.8039
822218	deltex 3-like [Rattus norvegicus]	R.TPS*LTESLDEALGDK.I	S115	3.30969	5.2623	157817937					366117	1.0498e+06	698905	514457	621274	1.00379e+06	0.348749	1.35853	0.618926			828.379	828.379	828.381	828.384	16.9024			2	2	2	2			6.11203	5.88857	7.65814	11.5657			5.2623	4.3491	5.1796	5.1458			9.22882		16.9024
824491	deltex 3-like [Rattus norvegicus]	R.T*PSLTESLDEALGDK.I	T113	16.0651	4.7877	157817937					317206	888836	58748.5	10867.4	689128	1.00012e+06	0.356878	5.40595	0.689049					828.388		8.46185					2						16.0651						4.7877						8.46185
824720	deoxycytidine kinase [Rattus norvegicus]	R.FCSS*PSTSSEGTR.I	S11	15.5742	2.8798	13162355	P48769		396918		863243	292195	732177	331894	260317	1.06591e+06	2.95433	2.20605	0.24422						741.794	18.4321						2						15.5742						2.8798
824798	deoxycytidine kinase [Rattus norvegicus]	R.FCSSPST*SSEGTR.I	T14	18.7848	3.0719	13162355	P48769		396918		882179	197060	759336	331894	166094	1.05722e+06	4.4767	2.28788	0.157104						741.796	11.5381						2						18.7848						3.0719
826801	DEP domain containing 5 (predicted) [Rattus norvegicus] [MASS=164743]	K.SASSCDVSSS*PSLPSR.A	S390	2.60609	3.3313	149047467	O75140	16795	411461		2.00787e+06	3.78851e+06	1.32592e+06	1.58301e+06	1.54101e+06	ND	0.52999	0.837593	1.54101e+06	852.353						19.0849	2						2.60609						3.3313						19.0849
825544	DEP domain containing 7 [Rattus norvegicus]	K.SDSLEDLWENLSLKPTNS*PHVSTR.L	S185	3.51119	6.0784	67677936			402020		20309	13829	211272	ND	ND	22046.4	1.46857	211272	4.53589e-05			935.778				7.9588			3						3.51119						6.0784						7.9588
823115	development and differentiation enhancing factor 2 (predicted) [Rattus norvegicus] [MASS=61866]	R.LLHEDLDES*DDDVDEK.L	S313*	0.376249	4.9082	149050986	Q7SIG6		398402	Casn_Kin2 (S529) 0.08%	4.83523e+06	9.66975e+06	368104	3.51882e+06	247280	649512	0.500036	0.10461	0.380716	656.268	656.268		656.266	656.273		100	3	3		3	3		4.56582	5.0285		1.48974	12.8482		4.3529	4.9082		3.8164	3.0054		100	100		100	100
823116	development and differentiation enhancing factor 2 (predicted) [Rattus norvegicus] [MASS=61866]	R.LLHEDLDES*DDDVDEK.L	S313*	0.0864357	5.9935	149050986	Q7SIG6		398402	Casn_Kin2 (S529) 0.08%	6.07371e+06	8.46962e+06	584175	4.795e+06	1.74143e+06	2.05503e+06	0.717117	0.12183	0.8474	983.904	983.91		983.894	983.893		100	2	2		2	2		10.7179	16.5496		0.41184	0.828766		5.9935	5.708		5.9404	5.4695		100	100		100	100
825114	development-related protein [Rattus norvegicus]	R.TAS*LTSASSVDGSR.P	S317	1.33229	3.9285	4105412	Q9ULP0	14817	413507	Akt_Kin (S317) 0.03% PKC_delta (S317) 0.1% Clk2_Kin (S317) 0.48%	6.08494e+07	1.23737e+08	4.06836e+07	5.27388e+07	4.44435e+07	4.98501e+07	0.491765	0.771418	0.891543		709.826	709.826	709.825			14.6862		2	2	2				19.8147	19.8147	18.4049				3.6551	3.9285	3.4972				7.23456	14.6862	7.23456
825118	development-related protein [Rattus norvegicus]	R.TAS*LTSASS*VDGSR.P	S317S323	2.1487	4.2636	4105412	Q9ULP0	14817	413507	Akt_Kin (S317) 0.03% PKC_delta (S317) 0.1% Clk2_Kin (S317) 0.48%	8.63371e+06	3.43911e+06	7.76835e+06	7.29856e+06	3.81103e+06	2.83854e+06	2.51045	1.06437	1.3426			749.806	749.81			21.3732			2	2					15.2008	19.8717					3.6999	4.2636					21.3732	11.8761
825237	development-related protein [Rattus norvegicus]	R.TASLTS*ASSVDGSR.P	S320	19.1098	3.9531	4105412	Q9ULP0	14817	413507		5.9152e+06	3.7781e+07	3.87195e+06	5.64308e+06	1.84257e+06	1.57447e+07	0.156565	0.686142	0.117028			709.825	709.826			8.93947			2	2					19.1098	19.8147					3.9531	3.068					8.93947	4.02739
825125	development-related protein [Rattus norvegicus]	R.TASLTSAS*S*VDGSR.P	S322S323	17.2026	3.5613	4105412	Q9ULP0	14817	413507		1.29333e+07	5.68105e+06	712226	6.16834e+06	1.96315e+06	6.39164e+06	2.27656	0.115465	0.307143			749.81	749.809			21.5729			2	2					19.8717	18.5372					3.5613	3.518					21.5729	21.5729
825099	development-related protein [Rattus norvegicus]	R.TASLTSASS*VDGSR.P	S323	16.9952	4.3672	4105412	Q9ULP0	14817	413507		6.14333e+06	3.79266e+07	6.27725e+06	5.64653e+06	2.06005e+06	2.20051e+06	0.161979	1.1117	0.936169			709.824	709.826			13.8917			2	2					16.9952	19.8147					4.3672	3.7864					13.8917	13.8917
825280	development-related protein [Rattus norvegicus]	R.T*ASLTSASSVDGSR.P	T315	19.1098	3.38	4105412	Q9ULP0	14817	413507	1433_m1 (T315) 0.05% Akt_Kin (T315) 0.51%	6.08602e+07	1.23737e+08	4.06782e+07	5.27388e+07	44459984	4.98855e+07	0.491852	0.771316	0.89124			709.825				8.23909			2						19.1098						3.38						8.23909
825110	development-related protein [Rattus norvegicus]	R.TASLT*SASSVDGSR.P	T319	19.8147	3.7652	4105412	Q9ULP0	14817	413507		4.45967e+07	1.23737e+08	3.2691e+06	1.46358e+06	37105274	4.98501e+07	0.360416	2.23362	0.744337				709.826			4.02739				2						19.8147						3.7652						4.02739
824033	diaphorase (NADH/NADPH); NAD(P)H:menadione oxidoreductase [Rattus norvegicus]	K.EGRLS*PDIVAEQK.K	S82	0.0131429	3.1787	27501444	P05982		402246		116808	1.84875e+06	3.65162e+06	1.66816e+06	243112	2.00842e+06	0.0631822	2.18901	0.121046		761.373	761.37	761.369		761.378	100		2	2	2		2		5.46743	1.61658	0.0131429		11.6445		3.0716	3.1787	2.904		2.4434		100	100	100
824672	Dicer1 protein [Rattus norvegicus] [MASS=45180]	K.SPSGSCAAAVS*PR.S	S107	3.43747	4.1342	71051733			401037		2.43358e+06	337482	2411556	453428	196938	822514	7.21101	5.31849	0.239434			663.781			663.79	62.6955			2			2			3.43747			16.961			2.9076			4.1342			62.6955
827259	Dihydrolipoamide dehydrogenase (E3 component of pyruvate dehydrogenase complex, 2-oxo-glutarate complex, branched chain keto acid dehydrogenase complex) [Rattus norvegicus] [MASS=54038]	K.IDVSVEAAS*GGK.A	S297	2.96894	3.3978	38303871	O08749		398712		1.48409e+06	715758	422570	262796	5201.8	3304.5	2.07345	1.60798	1.57416		606.781					93.8848		2						2.96894						3.3978						93.8848
822152	dihydroorotase [Rattus rattus]	R.AS*DPGLPAEEPK.E	S463*	0.937576	2.85	2506025	P27708	6437	407809		2.63328e+07	673596	7.82098e+06	142482	1.55879e+06	284392	39.0929	54.8909	5.48116	645.787		645.786		645.787		100	2		2		2		4.33918		3.39386		4.53289		2.85		2.7578		2.0794		100		100		100
822758	dihydroorotase [Rattus rattus]	R.IHRAS*DPGLPAEEPK.E	S463*	0.129655	4.7989	2506025	P27708	6437	407809		3.33257e+06	854630	1.00444e+07	823437	4.89078e+06	1.84968e+06	3.89943	12.1982	2.64412	566.275		566.273		566.277	566.276	100	3		3		3	3	2.45755		0.129655		6.02305	4.18432	4.0409		4.7989		4.5211	4.2413	100		100		100
823061	dihydroorotase [Rattus rattus]	R.IHRAS*DPGLPAEEPK.E	S463*	3.25905	4.2227	2506025	P27708	6437	407809		617663	68594.9	253538	ND	736644	ND	9.0045	253538	736644					848.911		100					2						5.56336						4.2227						100
822137	dihydropyrimidinase [Rattus norvegicus]	R.DQTCT*PIPVK.R	T484	0.557103	3.2776	1378019	Q63150		397541		12660924	1.1322e+07	1.003e+06	5.69336e+06	3538422	1.88087e+06	1.11826	0.17617	1.88127		619.78	619.778	619.781	619.779		44.6853		2	2	2	2			3.49602	0.557103	4.10963	1.64709			2.8744	2.8304	2.5656	3.2776			32.342	38.1697	35.3857	44.6853
822650	dihydropyrimidinase [Rattus norvegicus]	R.DQTCT*PIPVKR.A	T484	2.7462	4.0619	1378019	Q63150		397541		318679	5.66605e+06	407910	7.10817e+06	1.68276e+06	7.81873e+06	0.0562435	0.0573861	0.215222		697.832	697.831	697.83	697.832	697.834	44.6853		2	2	2	2	2		5.28445	3.97231	2.7462	4.93311	8.34611		3.5591	3.2228	3.331	3.0001	4.0619		44.6853	39.2689	44.6853	32.1312
826392	dihydropyrimidine dehydrogenase [Rattus norvegicus]	R.ACS*PLQR.K	S905	1.20696	2.7716	3628593			404874		2.35744e+06	1.10391e+06	3.79718e+06	1.28521e+06	231490	255095	2.13554	2.95453	0.907467	456.194	456.196	456.196	456.195			100	2	2	2	2			1.20696	5.22282	5.22282	2.76503			2.7716	2.6217	2.2928	2.3828			100	100	100	100
822842	Dihydrouridine synthase 3-like (S. cerevisiae) [Rattus norvegicus]	R.QGS*PVPTCGPLTDEDVVR.L	S267	0.209279	3.731	77415407					7.16586e+06	2.68682e+06	1.16649e+07	5.57404e+06	4.8937e+06	1.63765e+07	2.66704	2.09273	0.298824	1003.96	1003.96	1003.95	1003.96	1003.96	1003.95	69.9212	2	2	2	2	2	2	10.8575	7.26991	6.7218	7.38949	8.24154	0.209279	2.9659	3.3608	3.3188	3.731	3.4993	3.3195	51.706	42.0673	53.997	57.4957	51.4874
823631	Dihydroxyacetone kinase 2 homolog (yeast) [Rattus norvegicus]	K.S*PGASLLPVLTK.A	S511	2.32046	3.0964	68533714			407096		67068.4	15927.8	1.15343e+06	3.48467e+06	823580	1.24729e+06	4.21077	0.331	0.660295				631.843		631.843	50.9383				2		2				2.90652		2.32046				2.6215		3.0964				22.729
826116	Dmx-like 2 [Mus musculus] [MASS=340693]	R.KQS*ESVEEHVEQVK.H	S2637	0.316859	3.6473	168984055					389645	2.06632e+06	6.05925e+06	2.07579e+06	161375	354428	0.18857	2.91901	0.455312	579.27	579.268	579.269				24.3391	3	3	3				3.69283	0.316859	1.68799				3.2267	3.2928	3.6473				15.986	5.6244	24.3391
826602	DNA binding protein B [Rattus sp.]	R.NYQQNYQNS*ESGEKNEGSESAPEGQAQQR.R	S163*	1.03675	6.7306	220895	P67808	1095	415650		9283141	1.51877e+06	ND	5557.23	ND	ND	6.11226	0.000179946	1	1113.13	1113.14					29.2362	3	3					2.83457	8.47968					6.7306	6.205					26.7084	29.2362
823011	DNA binding protein B [Rattus sp.]	R.NYQQNYQNSESGEKNEGS*ESAPEGQAQQR.R	S172*	2.66377	6.6577	220895	P67808	1095	415650		9283141	1.51877e+06	867726	4.37235e+06	1.18234e+06	1.38527e+06	6.11226	0.198458	0.853505	1113.13	1113.13		1113.13	1113.13		33.1745	3	3		3	3		5.53128	4.74924		2.66377	3.32297		6.6577	5.6136		5.9521	5.7017		33.1745	7.31499		9.12045	9.12045
823386	DNA binding protein B [Rattus sp.]	K.NEGS*ESAPEGQAQQR.R	S172*	1.1753	5.5644	220895	P67808	1095	415650		1.5338e+06	3.87819e+06	2.41865e+06	1.50493e+06	552382	1.69532e+06	0.395493	1.60715	0.325827	834.342		834.339	834.34	834.347	834.343	39.2689	2		2	2	2	2	6.21823		2.70437	4.31739	12.7362	8.04711	5.3735		5.0112	5.3989	5.5644	5.5272	39.2689		22.4115	12.0412	32.1312
826931	DNA binding protein B [Rattus sp.]	K.NEGS*ESAPEGQAQQR.R	S172*	2.36857	5.0083	220895	P67808	1095	415650		478736	ND	ND	ND	5958.77	143501	478736	1	0.0415243	556.563						6.74238	3						4.89304						5.0083						6.74238
822867	DNA binding protein B [Rattus sp.]	K.NEGSES*APEGQAQQR.R	S174*	2.70437	5.7258	220895	P67808	1095	415650		2.91044e+06	593474	1130329	1.50493e+06	906810	1.32958e+06	4.90408	0.751083	0.682026	834.339	834.339	834.34	834.339	834.344	834.351	55.2084	2	2	2	2	2	2	3.07015	3.51388	3.72975	3.43593	9.07248	17.4912	5.2372	5.5251	5.0115	4.563	5.1731	5.7258	55.2084	32.342	37.8415	13.9358	51.1501
822870	DNA binding protein B [Rattus sp.]	K.NEGSES*APEGQAQQR.R	S174*	3.68778	5.3776	220895	P67808	1095	415650		485764	ND	2104.62	21779.2	41872.5	176068	485764	0.0966349	0.23782	556.562				556.565	556.566	7.87106	3				3	3	3.68778				8.73669	9.83401	5.3776				4.9906	5.2777	7.87106				4.77121
825606	DNA binding protein B [Rattus sp.]	R.NYQQNYQNSESGEKNEGSES*APEGQAQQR.R	S174*	1.01877	5.8558	220895	P67808	1095	415650		9.23597e+06	1.51877e+06	867726	4.37235e+06	897263	1.38527e+06	6.0812	0.198458	0.647717		1113.13		1113.13			7.31499		3		3				5.07884		1.01877				5.8558		5.6434				7.31499
825049	DNA binding protein B [Rattus sp.]	K.AADPPAENSS*APEAEQGGAE.-	S312	3.31685	4.8409	220895	P67808	1095	415650		2.14367e+06	6.36797e+06	660893	1.66198e+06	3.02721e+06	122667	0.336633	0.397653	24.6783		989.395		989.392			25.5751		2		2				6.15841		3.31685				4.8409		3.2074				25.5751		12.0862
826603	DNA binding protein B [Rattus sp.]	R.NYQQNY*QNSESGEKNEGSESAPEGQAQQR.R	Y160*	4.63238	6.0505	220895	P67808	1095	415650		9.21868e+06	1.51877e+06	ND	5557.23	ND	ND	6.06982	0.000179946	1	1113.13	1113.15					-0.264749	3	3					5.53128	19.0147					6.0505	5.9865
823815	DNA topoisomerase I [Rattus norvegicus]	K.EKENGFSS*PPR.I	S114	4.48939	3.0709	4809197	Q07050		402038	Cdk5_Kin (S114) 0.46% Cdc2_Kin (S114) 0.54%	899381	662579	1.75211e+06	3.27083e+06	2.57622e+06	5.16216e+06	1.35739	0.535679	0.499059						664.294	12.0862						2						9.54368						3.0709
825492	DNA topoisomerase IIbeta [Rattus norvegicus] [MASS=181964]	K.S*EDDSAKFDSNEEDTTSVFAPSFGLK.Q	S1444	0.258334	4.6369	109945583					215586	196656	3.9743e+06	ND	190.8	20016.4	1.09626	3.9743e+06	0.00953218			968.41				11.549			3						0.258334						4.6369						11.549
823367	DNA topoisomerase IIbeta [Rattus norvegicus] [MASS=181964]	K.VVEPANS*DS*DSELGNIPK.K	S1510S1512	0.502257	5.1682	109945583					3.19827e+06	711124	3.40486e+06	7.59457e+06	820703	7.62046e+06	4.49748	0.448328	0.107697	1015.93	1015.92	1015.93	1015.92		1015.93	40.3062	2	2	2	2		2	11.1578	0.940499	4.48582	0.502257		6.77057	4.7292	5.1682	4.1214	5.11		4.2543	33.1842	39.3989	40.3062	36.7487
826161	DNA topoisomerase IIbeta [Rattus norvegicus] [MASS=181964]	R.KVVEPANS*DS*DSELGNIPK.K	S1510S1512	0.0138958	5.9524	109945583					958036	2.14883e+06	2286516	4.50639e+06	1.21121e+06	701599	0.445841	0.507394	1.72636	1079.98		1079.97	1079.97			50.7485	2		2	2			8.69404		0.0138958	3.03853			4.5639		4.3121	5.9524			41.8114		41.4299	50.7485
826216	DNA topoisomerase IIbeta [Rattus norvegicus] [MASS=181964]	R.KVVEPANS*DSDS*ELGNIPK.K	S1510S1514	8.56898	4.0198	109945583					790080	4459.35	196721	5933.77	220477	69770.6	177.174	33.1528	3.16003	720.321						6.59229	3						8.56898						4.0198						6.59229
823174	DNA topoisomerase IIbeta [Rattus norvegicus] [MASS=181964]	K.VVEPANSDS*DSELGNIPK.K	S1512	0.574103	5.0183	109945583					9.89916e+06	4.17152e+06	2.36906e+06	2902113	2.00284e+06	2.53884e+06	2.37303	0.816321	0.788878	975.948	975.943			975.952	975.955	35.3857	2	2			2	2	9.6879	4.8696			14.132	16.946	4.5069	4.5162			5.0183	4.0535	35.3857	13.4324			13.4324
826146	DNA topoisomerase IIbeta [Rattus norvegicus] [MASS=181964]	R.KVVEPANSDS*DSELGNIPK.K	S1512	9.62489	4.1843	109945583					1.60456e+06	35883.4	275711	94860.6	494122	100414	44.716	2.90648	4.92084	1040						22.6067	2						9.62489						4.1843						22.6067
826985	DNA topoisomerase IIbeta [Rattus norvegicus] [MASS=181964]	K.VVEPANSDSDS*ELGNIPK.K	S1514	7.56068	4.2232	109945583					1.01185e+07	4.20344e+06	2.38936e+06	2.90147e+06	1.99288e+06	2.53165e+06	2.4072	0.823498	0.787185	975.946	975.948					10.8814	2	2					7.56068	10.2517					4.2232	2.664					6.76694	10.8814
826298	DNA topoisomerase IIbeta [Rattus norvegicus] [MASS=181964]	R.KAS*GS*ENEGDYNPGR.K	S1539S1541*	3.90088	4.8432	109945583	Q64399	537		PKA_Kin (S1545) 0.86%	1.87154e+06	181496	4.07753e+06	1.15966e+06	281239	2777.47	10.3117	3.51614	101.257	870.826		870.82				89.9429	2		2				10.4846		3.90088				2.5647		4.8432				66.5039		89.9429
825452	DNA topoisomerase IIbeta [Rattus norvegicus] [MASS=181964]	K.KTS*FDQDSDVDIFPSDFTSEPPALPR.T	S1565*	0.240696	5.5759	109945583	Q64399			PKC_epsilon (S1563) 0.66%	148756	134763	1877117	7.5659e+06	2.83244e+06	29479.3	1.10384	0.248102	96.0824	997.775	997.801	997.781	997.782			9.08485	3	3	3	3			6.8699	19.2051	0.240696	0.922666			4.3982	4.2981	5.2687	5.5759			9.08485			8.86057
822364	DNA topoisomerase IIbeta [Rattus norvegicus] [MASS=181964]	K.KTSFDQDS*DVDIFPSDFTSEPPALPR.T	S1570*	0.150435	5.8432	109945583	Q64399				1.40535e+06	190997	1.96353e+06	7.50444e+06	2.83938e+06	1.22149e+07	7.35798	0.261649	0.232452	997.784	997.79	997.78	997.784	997.8	997.794	39.0822	3	3	3	3	3	3	2.49053	8.20699	1.22019	2.39024	18.4296	12.4926	4.4933	4.7019	5.1577	5.5183	5.8432	5.1017	20.9918	20.7259	15.5207	39.0822	26.8668
821936	DOC-2 p82 isoform [Rattus norvegicus]	K.S*ADNSLENPFSK.G	S729	3.48558	4.7633	3157993	P98078		415367		712256	1.15183e+06	2.32618e+06	4.34587e+06	876075	3.44523e+06	0.618369	0.535263	0.254286	694.794	694.794	694.794	694.793	694.794	694.799	74.7163	2	2	2	2	2	2	5.94132	5.94132	6.29419	3.74484	5.06273	12.8043	4.4082	4.1625	3.8967	4.7633	4.4794	4.6517	71.7855	26.7778	55.8149	74.7163	68.5184
825613	DOC-2 p82 isoform [Rattus norvegicus]	R.QGVLSGTKS*ADNSLENPFSK.G	S729	2.742	3.9209	3157993	O88797		415367		44495.3	76000.5	157994	2.51446e+06	208406	838949	0.58546	0.0628341	0.248413				720.341			9.42795				3						2.742						3.9209						9.42795
825219	DOC2/DAB2 interactive protein [Rattus norvegicus]	R.LPS*PTPENK.D	S509	0.828245	3.0103	15277525	Q5VWQ8	9903	406167	Erk1_Kin (S578) 0.33% GSK3_Kin (S578) 0.92%	510332	1.37311e+06	656021	888801	18482.5	182906	0.371662	0.738096	0.101049		531.747	531.747	531.748			60.386		2	2	2				0.828245	0.828245	1.40237				2.8638	3.0103	2.961				51.1501	60.386	55.2084
822021	docking protein 3 (predicted) [Rattus norvegicus]	R.ALS*LPSLEPPGELR.E	S274	2.66232	3.6619	149039855	Q9QZK7		402700	1433_m1 (S274) 0.06% Akt_Kin (S274) 0.45%	638691	418196	978347	1.04088e+06	3.83254e+06	1.83696e+06	1.52725	0.939919	2.08635	779.909		779.902	779.902	779.902	779.9	46.8588	2		2	2	2	2	14.7997		6.26124	6.33822	5.24123	2.66232	3.6117		2.4138	3.3902	3.6619	2.6157	46.8588		46.8588	22.3754	46.8588
825721	DRPLA [Rattus norvegicus]	K.TAS*PPGPPQYSK.R	S625*	1.42793	3.391	995557	P54258		403353	Erk1_Kin (S625) 0.57%	2.88055e+06	4.66027e+06	560852	3.72571e+06	724987	331545	0.618108	0.150535	2.18669		655.297	655.296	655.297			16.9024		2	2	2				3.19948	1.79446	2.63442				3.391	2.4271	2.7155				16.9024	16.9024	13.8039
825710	DRPLA [Rattus norvegicus]	R.TGT*PPGYR.G	T662*	2.98364	2.6188	995557	P54259	6311	403353	Cdc2_Kin (T664) 0.62% Cdk5_Kin (T664) 0.65% Akt_Kin (T664) 0.68%	158650	607468	358426	1.59692e+06	ND	ND	0.261166	0.224448	1				464.701			50.6181				2						2.98364						2.6188						50.6181
822628	Dsp protein [Rattus norvegicus] [MASS=69749]	R.S*SSLSDPLEESSPIAAIFDTENLEK.I	S371	4.73676	6.3841	67678070					4.83021e+06	1.07584e+07	172430	243650	42413.7	13989.3	0.44897	0.707693	3.03186				920.427	920.434		20.6912				3	3					4.73676	11.5066					6.3841	5.1027					20.6912	10.048
826394	Dsp protein [Rattus norvegicus] [MASS=69749]	R.S*SSLSDPLEESSPIAAIFDTENLEK.I	S371	9.39013	5.4349	67678070					635860	638419	ND	1314.08	831.833	1106.1	0.99599	0.000760992	0.752042	1380.14						13.9794	2						9.39013						5.4349						13.9794
824540	Dsp protein [Rattus norvegicus] [MASS=69749]	R.SS*SLSDPLEESSPIAAIFDTENLEK.I	S372	15.9533	5.2873	67678070					ND	313694	170540	222103	15024.5	248765	3.18782e-06	0.76784	0.0603964						920.438	11.9498						3						15.9533						5.2873
823416	Dtd1 protein [Rattus norvegicus] [MASS=23394]	R.S*ASSGAEGDVSSEREP.-	S194	2.14028	4.508	166796825	Q8TEA8	13631	400236		4.36282e+06	8427146	1.61402e+06	3.40169e+06	2.54569e+06	293632	0.51771	0.474475	8.66967	822.827	822.828		822.827		822.828	79.8637	2	2		2		2	5.1926	5.9344		5.04668		6.37826	4.4318	4.508		3.9535		4.2964	40.126	79.8637		58.725
826263	Dtd1 protein [Rattus norvegicus] [MASS=23394]	R.S*AS*SGAEGDVSSEREP.-	S194S196	1.61196	4.2296	166796825	Q8TEA8	13631	400236	Clk2_Kin (S120) 0.29% 1433_m1 (S120) 0.41% Akt_Kin (S120) 0.92%	1.00067e+06	2.10415e+06	66518.4	151559	39997.5	111257	0.47557	0.438895	0.359506	862.811	862.807					76.7748	2	2					5.4331	1.61196					2.9278	4.2296					52.7013	76.7748
826352	Dtd1 protein [Rattus norvegicus] [MASS=23394]	R.S*ASS*GAEGDVSSEREP.-	S194S197	0.440681	5.38	166796825	Q8TEA8	13631	400236	Casn_Kin1 (S121) 0.63%	1.00067e+06	2.09892e+06	105980	153679	63121.7	153018	0.476754	0.689616	0.412512	862.806	862.812					53.5199	2	2					0.440681	6.42462					2.8132	5.38					19.3819	53.5199
822102	Dtd1 protein [Rattus norvegicus] [MASS=23394]	R.SAS*SGAEGDVSSEREP.-	S196	0.376983	4.759	166796825	Q8TEA8	13631	400236	Clk2_Kin (S120) 0.29% 1433_m1 (S120) 0.41% Akt_Kin (S120) 0.92%	5.98777e+06	8.41858e+06	1.44796e+06	3.40244e+06	2.54569e+06	1.29897e+06	0.711256	0.425564	1.95978	822.825	822.827	822.828	822.828	822.826	822.839	19.0849	2	2	2	2	2	2	2.59631	5.04668	5.78847	6.23233	3.557	19.0737	3.8662	4.759	3.2508	4.0503	4.466	4.5541	9.55447	14.2441	9.77724	9.77724	19.0849
826317	Dtd1 protein [Rattus norvegicus] [MASS=23394]	R.SAS*S*GAEGDVSSEREP.-	S196S197	5.71722	4.0975	166796825	Q8TEA8	13631	400236	Clk2_Kin (S120) 0.29% 1433_m1 (S120) 0.41% Casn_Kin1 (S121) 0.63% Akt_Kin (S120) 0.92%	995306	2.1271e+06	112108	158418	46090.3	83548.7	0.467917	0.707673	0.551658	862.814	862.812					3.22613	2	2					8.76135	6.92328					3.5651	4.0975						3.22613
823467	Dtd1 protein [Rattus norvegicus] [MASS=23394]	R.SASS*GAEGDVSSEREP.-	S197	2.74224	4.8185	166796825	Q8TEA8	13631	400236	Casn_Kin1 (S121) 0.63%	4.35719e+06	8.42422e+06	1.72054e+06	3.42101e+06	2.54569e+06	1.32632e+06	0.517221	0.502934	1.91936	822.831	822.827	822.827	822.827		822.832	13.8917	2	2	2	2		2	9.49744	4.74874	5.41757	4.67578		10.6831	4.5224	4.6029	3.7925	4.2478		4.8185	10.7918	8.94362	12.0862	10.7918
824098	Dtd1 protein [Rattus norvegicus] [MASS=23394]	R.SASSGAEGDVSS*EREP.-	S205	1.53225	4.621	166796825	Q8TEA8	13631	400236		1.94702e+06	2.46889e+06	134329	227409	870758	1.29559e+06	0.788623	0.590696	0.672094	822.828	822.829			822.832		27.6042	2	2			2		6.60323	7.64296			11.4249		3.9389	4.621			4.4836		19.0849	27.6042			22.4677
822136	Dual Specificity Yak1-related Kinase (Dyrk) [Rattus norvegicus]	R.IYQY*IQSR.F	Y321*	0.399816	3.0819	2582816	Q13627	5188	412474		9.54055e+06	1.26229e+07	8.91196e+06	6.53515e+06	3.93272e+06	2.59759e+06	0.755814	1.3637	1.51399	575.77	575.769	575.769	575.769	575.773	575.773	55.2084	2	2	2	2	2	2	2.73786	1.2516	1.67749	1.88608	8.89148	7.50953	2.5773	2.9849	2.9222	2.9312	3.0819	2.9492	51.1501	55.2084	55.2084	55.2084	55.2084
823968	during insulin stimulation, undergoes tyrosine phosphorylation and binds phosphatidylinositol 3-kinase [Rattus norvegicus]	R.HSS*ETFSAPTR.A	S1100*	4.15531	3.7089	56504	P35569		403243	Akt_Kin (S1100) 0.21% Clk2_Kin (S1100) 0.49% 1433_m1 (S1100) 0.5%	21155.5	60939.2	18582	278264	44298.4	1395.13	0.347157	0.0667783	31.7521						650.275	16.9461						2						4.15531						3.7089
825841	during insulin stimulation, undergoes tyrosine phosphorylation and binds phosphatidylinositol 3-kinase [Rattus norvegicus]	R.AS*SDGEGTMSRPASVDGSPVSPSTNR.T	S324*	4.35125	5.9545	56504	Q28224	943	403243		400562	2.63547e+06	1.06181e+06	1.26511e+06	235382	756607	0.151989	0.839304	0.311103		877.049	877.049	877.05			56.068		3	3	3				4.8381	4.6289	5.67107				4.9823	4.0156	5.9545				29.7754	27.3721	56.068
825878	during insulin stimulation, undergoes tyrosine phosphorylation and binds phosphatidylinositol 3-kinase [Rattus norvegicus]	R.ASS*DGEGTMSRPASVDGSPVSPSTNR.T	S325*	4.8381	5.1841	56504	Q28224	943	403243	Akt_Kin (S325) 0.13%	235054	4748.52	ND	1.26511e+06	23283.4	7083.43	49.5003	7.90446e-07	3.28703				877.05			16.902				3						6.08945						5.1841						16.902
826791	during insulin stimulation, undergoes tyrosine phosphorylation and binds phosphatidylinositol 3-kinase [Rattus norvegicus]	R.PASVDGSPVS*PSTNR.T	S343*	1.48321	2.7558	56504	Q28224	943	403243	Cdc2_Kin (S343) 0.61% p38_Kin (S343) 0.99%	8.8436e+06	3.36055e+06	1.9007e+06	855542	1.40236e+06	192641	2.6316	2.22163	7.27967	775.848						17.7936	2						2.42473						2.7558						17.7936
826004	during insulin stimulation, undergoes tyrosine phosphorylation and binds phosphatidylinositol 3-kinase [Rattus norvegicus]	R.THSAGTS*PTISHQK.T	S526*	1.6583	2.7095	56504	P35569		403243		ND	6984.2	134768	33600.3	738.667	ND	0.00014318	4.01093	738.667			511.236				17.7936			3						1.6583						2.7095						17.7936
825797	during insulin stimulation, undergoes tyrosine phosphorylation and binds phosphatidylinositol 3-kinase [Rattus norvegicus]	K.S*PGEYVNIEFGSGQPGYLAGPATSR.S	S891*	4.48334	5.8391	56504	P35569		403243	Erk1_Kin (S891) 0.67%	12894.4	264295	390435	166872	5194.63	81214.4	0.048788	2.33972	0.063962			1317.6				16.902			2						5.32609						5.8391						16.902
824942	during insulin stimulation, undergoes tyrosine phosphorylation and binds phosphatidylinositol 3-kinase [Rattus norvegicus]	R.THSAGT*S*PTISHQK.T	T525S526*	2.50673	2.9247	56504	P35569		403243		ND	ND	8364.73	ND	30241.7	2445.43	1	8364.73	12.3666			537.892				-5.22405			3						2.50673						2.9247
822584	during insulin stimulation, undergoes tyrosine phosphorylation and binds phosphatidylinositol 3-kinase [Rattus norvegicus]	K.SPGEY*VNIEFGSGQPGYLAGPATSR.S	Y895*	17.0031	4.9241	56504	P35569		403243	PDGFR_Kin (Y895) 0.01% EGFR_Kin (Y895) 0.13% Grb2_SH2 (Y895) 0.15% Fgr_Kin (Y895) 0.62%	72604	10170.7	ND	ND	279574	13351.2	7.13853	1	20.94					1317.62		-0.315171					2						17.0031						4.9241
826038	during insulin stimulation, undergoes tyrosine phosphorylation and binds phosphatidylinositol 3-kinase [Rattus norvegicus]	K.SPGEY*VNIEFGSGQPGYLAGPATSR.S	Y895*	3.02559	3.9006	56504	P35569		403243	PDGFR_Kin (Y895) 0.01% EGFR_Kin (Y895) 0.13% Grb2_SH2 (Y895) 0.15% Fgr_Kin (Y895) 0.62%	365088	23939.1	825358	300351	391328	23570.4	15.2507	2.74798	16.6025			878.739				7.41992			3						5.87654						3.9006						7.41992
824813	dynamin-like protein [Rattus norvegicus]	K.SKPIPIMPAS*PQK.G	S635*	0.468192	3.6109	2425052	O00429	4833	396142	Cdk5_Kin (S616) 0.56% Cdc2_Kin (S616) 0.72% p38_Kin (S616) 0.93%	3.05211e+06	2.05141e+06	3.59641e+06	1926459	1.93247e+06	3.1558e+06	1.48781	1.86685	0.612354	737.382	737.384	737.381	737.382			99.254	2	2	2	2			2.61916	4.60726	0.468192	2.78879			3.3433	3.3819	3.5768	3.6109			65.0614	52.2284	99.254	96.8057
823148	dynein cytoplasmic 1 heavy chain 1 [Rattus norvegicus]	R.TDS*TSDGRPAWMR.T	S4366	1.87865	3.1794	148491097			398887	Akt_Kin (S554) 0.54%	970223	5.03705e+06	2.92856e+06	2.38017e+06	1.12791e+06	1.80755e+06	0.192617	1.2304	0.623999		520.551	520.549		520.552	520.553	15.0014		3	3		3	3		4.34716	1.87865		7.51454	8.92511		3.1794	2.975		2.5995	2.6165		15.0014	13.7946		12.2185
827619	dynein cytoplasmic 1 heavy chain 1 [Rattus norvegicus]	R.TDSTS*DGRPAWMR.T	S4368	3.05199	3.161	148491097			398887		970223	3.78905e+06	2.92856e+06	ND	ND	3693	0.25606	2.92856e+06	0.000270783		520.55					7.31499		3						3.05199						3.161						7.31499
825832	dynein light intermediate chain 1 [Rattus norvegicus]	R.DFQEYVEPGEDFPAS*PQRR.T	S207*	4.0477	3.0094	6651427	Q90828	10917	401092	Cdk5_Kin (S207) 0.03% Cdc2_Kin (S207) 0.03%	78680	3725.6	3.0921e+06	4.68735e+06	934927	379643	21.1187	0.659669	2.46265			783.009	783.011			60.071			3	3					4.0477	6.46778					2.6811	3.0094					36.2761	60.071
825723	dynein light intermediate chain 1 [Rattus norvegicus]	R.KPASVS*PTTPPSPTEGEAS.-	S510	4.16695	3.43	6651427	Q9QXU8		401092	Erk1_Kin (S510) 0.26%	42358.8	8.73112e+07	2.1624e+07	2.38623e+06	2.18144e+07	3.14649e+06	0.000485147	9.06201	6.93291				960.439			24.1234				2						4.16695						3.43						24.1234
825071	dynein light intermediate chain 1 [Rattus norvegicus]	R.KPASVS*PTTPPS*PTEGEAS.-	S510S516	1.67014	3.8883	6651427	Q9QXU8		401092	Erk1_Kin (S510) 0.26% GSK3_Kin (S516) 0.3% Erk1_Kin (S516) 0.76%	2.0776e+06	5.45522e+06	1.82456e+06	2.43275e+06	1.62199e+06	1.5545e+06	0.380846	0.749999	1.04341	1000.43	1000.43	1000.42	1000.42			29.4356	2	2	2	2			11.6159	7.65059	3.14026	4.35535			2.9786	3.8432	3.7482	3.8883			14.5245	29.0768	19.868	29.4356
822661	dynein light intermediate chain 1 [Rattus norvegicus]	R.KPASVSPTTPPS*PTEGEAS.-	S516	0.348983	5.2777	6651427	Q9QXU8		401092	GSK3_Kin (S516) 0.3% Erk1_Kin (S516) 0.76%	4.27743e+07	8.70902e+07	2.1636e+07	2.38005e+06	2.17715e+07	3.14649e+06	0.49115	9.09058	6.91929	960.441	960.438	960.439		960.438	960.445	32.1312	2	2	2		2	2	5.50036	3.20855	4.16695		2.32308	10.1412	4.4655	5.2777	4.8598		4.4718	4.0963	32.1312	32.1312	32.1312		32.1312
827223	dynein light intermediate chain 1 [Rattus norvegicus]	R.KPASVSPT*TPPS*PTEGEAS.-	T512S516	9.97075	3.3782	6651427	Q9QXU8		401092	GSK3_Kin (T512) 0.05% GSK3_Kin (S516) 0.3% Erk1_Kin (S516) 0.76%	463482	5.47848e+06	933779	1.97105e+06	752510	603224	0.0846005	0.473747	1.24748		1000.43					12.9885		2						9.97075						3.3782						12.9885
824563	dynein light intermediate chain 1 [Rattus norvegicus]	R.KPASVSPTT*PPS*PTEGEAS.-	T513S516	0.590051	4.7963	6651427	Q9QXU8		401092	p38_Kin (T513) 0.05% Erk1_Kin (T513) 0.29% GSK3_Kin (S516) 0.3% Erk1_Kin (S516) 0.76%	74455124	9.61267e+07	654481	383416	1.98498e+07	480995	0.774552	1.70697	41.2682		1000.43	1000.42	1000.43		1000.44	38.0386		2	2	2		2		7.34557	0.640054	7.04055		19.2463		4.0683	2.682	4.7963		4.229		24.4943	18.6582	31.1621
825278	dynein light intermediate chain 1 [Rattus norvegicus]	R.KPASVSPTT*PPSPT*EGEAS.-	T513T518	3.3353	4.8073	6651427	Q9QXU8		401092	p38_Kin (T513) 0.05% Erk1_Kin (T513) 0.29%	1.43944e+06	1.9939e+06	654481	566795	2.16937e+07	2.22183e+07	0.721922	1.15471	0.976388	1000.43	1000.43	1000.42	1000.43			25.397	2	2	2	2			6.67552	15.0361	3.80531	7.40558			2.9884	4.8073	3.0273	4.1994			18.9176	25.397	20.7927	15.4259
826023	dynein light intermediate chain 1 [Rattus norvegicus]	R.KPASVSPTTPPSPT*EGEAS.-	T518	1.75012	4.5467	6651427	Q9QXU8		401092		1.90262e+07	8.734e+07	2.16288e+07	2.38766e+06	2.18221e+07	3.13998e+06	0.21784	9.05859	6.94976	960.437	960.443	960.44				13.9358	2	2	2				1.75012	8.4224	5.12013				3.4821	4.5467	3.7422				13.4324	13.9358	10.8814
824911	E1A binding protein p300, isoform CRA_a [Rattus norvegicus] [MASS=254693]	K.TEVKEEEDQPSTSAAQSS*PAPGQSK.K	S998	2.67975	5.0647	149065844					559574	942265	205724	400389	187750	39293.2	0.593861	0.513811	4.77818				890.057			40.192				3						2.67975						5.0647						40.192
822910	E1A binding protein p400, isoform CRA_a [Rattus norvegicus] [MASS=333231]	K.ALS*PVTSR.S	S698	2.2187	2.4769	149063710	Q96L91	9378			638851	1.20478e+06	1.34828e+06	844053	307512	131250	0.530263	1.59739	2.34296		455.725			455.726		48.6251		2			2			3.7015			5.0415			2.4769			2.342			48.6251			48.6251
824551	E2F transcription factor 3 [Rattus norvegicus]	R.Y*DTSLGLLT*K.K	Y172T180	17.205	2.9032	212549627	Q14209	2692	411384		ND	ND	ND	ND	ND	ND	1	1	1						635.783	20.6697						2						17.205						2.9032
821832	echinoderm microtubule associated protein like 4 (predicted), isoform CRA_c [Rattus norvegicus] [MASS=11383]	R.AS*PSPQPSSQPLQINR.Q	S79	0.195876	4.5437	149050564					1.3207e+08	1.67935e+08	4.68191e+07	1.28923e+08	2.79472e+07	4.66311e+07	0.786433	0.363157	0.599326	893.927	893.933	893.931	893.932	893.93	893.93	42.3641	2	2	2	2	2	2	0.363769	5.71953	3.67125	4.48833	1.95875	2.16582	4.4779	4.4485	4.5437	4.4475	4.2591	4.3375	41.9074	35.2009	42.3641	28.1518	33.6415
823949	echinoderm microtubule associated protein like 4 (predicted), isoform CRA_c [Rattus norvegicus] [MASS=11383]	R.AS*PS*PQPSSQPLQINR.Q	S79S81	1.77843	4.7228	149050564					3.36281e+06	3.75203e+06	4.08866e+06	8.52418e+06	2.6867e+06	5.11795e+06	0.896266	0.479654	0.524957	933.913	933.918	933.914	933.915	933.927	933.928	60.1299	2	2	2	2	2	2	1.77843	7.0976	3.2408	4.81031	16.7073	18.7374	4.2968	4.7228	3.9409	4.5921	3.474	3.8801	56.2776	53.9361	60.1299	53.9361	23.9969
821819	echinoderm microtubule associated protein like 4 (predicted), isoform CRA_c [Rattus norvegicus] [MASS=11383]	R.ASPS*PQPSSQPLQINR.Q	S81	0.050368	4.6514	149050564					1.32089e+08	1.67928e+08	4.68345e+07	1.28986e+08	1.60948e+08	4.66563e+07	0.786583	0.363099	3.44964	893.928	893.931	893.932	893.93	893.941	893.944	35.8493	2	2	2	2	2	2	0.223858	3.72162	4.62264	2.03151	14.8024	17.9475	4.417	4.6514	4.5834	4.4706	4.423	4.6061	20.8518	35.8493	20.8039	22.833	9.0309
825676	echinoderm microtubule associated protein like 4 (predicted), isoform CRA_c [Rattus norvegicus] [MASS=11383]	R.ASPS*PQPSSQPLQINR.Q	S81	0.453312	4.2334	149050564					2.15446e+06	4.03924e+06	3.81668e+06	2.10049e+07	609071	106416	0.533382	0.181705	5.72351	596.291	596.29	596.283	596.289			26.2665	3	3	3	3			5.26623	3.72162	7.85188	3.01088			2.8033	3.0719	3.8784	4.2334			14.389	15.0978	26.2665	18.8596
827291	EF hand domain containing 2 [Rattus norvegicus]	R.ADLNQGIGEPQS*PSR.R	S73*	6.99927	3.4581	71051785	Q96C19	13266	402956	Cdc2_Kin (S74) 0.02% p38_Kin (S74) 0.03% Cdk5_Kin (S74) 0.07%	2.63665e+06	5.92326e+06	661505	354485	665835	9.31679e+07	0.445135	1.8661	0.00714662		824.879	824.876				24.1234		2	2					10.5231	6.99927					3.4581	3.0382					7.78151	24.1234
822466	EG3RVC [Rattus norvegicus] [MASS=43877]	K.IYQFPDCDS*DEDEDFKLQDQALK.E	S226	0.144867	5.3841	32423788	O43236	4738	399078	Casn_Kin2 (S325) 0.07%	2.35799e+06	2.07878e+06	2.01672e+07	1.3818e+07	15345103	9.1983e+06	1.13432	1.45949	1.66825		967.079	967.075	967.074	967.084	967.083	121.917		3	3	3	3	3		7.17779	3.51475	1.86948	11.9135	11.6617		5.3841	5.2559	5.3329	5.0161	3.649		102.262	121.917	99.2026	89.9872
826514	EG3RVC [Rattus norvegicus] [MASS=43877]	R.ES*GTDFPIPAVPPGTDPETEK.L	S333	3.25971	3.4813	32423788	O43236	4738	399078		954272	970549	32962.7	28601.1	545713	1.16597e+06	0.983229	1.1525	0.468033		1132.51					10.7221		2						3.25971						3.4813						10.7221
823447	EG3RVC [Rattus norvegicus] [MASS=43877]	R.ESGT*DFPIPAVPPGTDPETEK.L	T335	1.36484	3.9156	32423788	O43236	4738	399078		664992	740840	348156	278741	762562	1.19773e+06	0.897619	1.24903	0.636672		1132.51	1132.52	1132.51		1132.51	-0.396848		2	2	2		2		6.54147	11.2852	5.35333		1.36484		3.4003	3.7371	3.6994		3.9156
821822	EH- and SH3-domain containing protein EHSH1 [Rattus norvegicus]	R.S*GSGMSVISSSSADQR.L	S313	0.366823	5.0899	4835853	Q9WVE9		396240		3.58023e+06	4.66096e+06	4.08867e+06	4.51246e+06	4.06176e+06	8.47963e+06	0.768133	0.906083	0.479002	818.341	818.34	818.338	818.341	818.341	818.346	68.3411	2	2	2	2	2	2	4.03503	2.31709	0.599143	4.70753	3.58873	10.6011	4.9095	4.546	4.6976	4.4782	4.7796	5.0899	46.6786	68.3411	57.227	46.6786	49.1703
825100	EH- and SH3-domain containing protein EHSH1 [Rattus norvegicus]	R.SGS*GMSVISSSSADQR.L	S315	0.37905	4.843	4835853	Q9WVE9		396240	PKC_delta (S315) 0.67% Akt_Kin (S315) 0.96%	2.71294e+06	9.53727e+06	3.28938e+06	4.52064e+06	4.04009e+06	7.99274e+06	0.284457	0.727636	0.50547	818.339	818.337	818.338	818.338			7.59668	2	2	2	2			1.79743	1.26554	0.37905	0.525779			4.6085	4.843	4.8137	4.7047						7.59668
822499	EH- and SH3-domain containing protein EHSH1 [Rattus norvegicus]	R.LPEEPS*SEDEQQVEK.K	S334	2.18779	4.2508	4835853	Q9WVE9		396240	Casn_Kin2 (S334) 0.42%	2.43225e+07	7.75627e+07	1.41216e+07	5.59386e+06	4.69478e+06	2.1104e+06	0.313586	2.52448	2.22459	912.394	912.39	912.388	912.385	912.39	912.397	12.0862	2	2	2	2	2	2	11.8929	8.41661	5.26931	2.86221	7.6106	15.5775	4.2351	4.2508	3.6773	3.6101	3.3127	3.7617	9.77724	12.0862		12.0862
825088	EH- and SH3-domain containing protein EHSH1 [Rattus norvegicus]	R.LPEEPS*S*EDEQQVEK.K	S334S335	0.22062	4.6329	4835853	Q9WVE9		396240	Casn_Kin2 (S335) 0.27% Casn_Kin2 (S334) 0.42%	2.39635e+06	2.7976e+06	467157	344592	4.16054e+06	2.96492e+06	0.856574	1.35568	1.40325	952.366	952.379	952.365	952.365			100	2	2	2	2			0.22062	13.9514	0.798435	0.735401			3.0021	4.6329	3.7532	4.0369			100	100	100	100
822142	EH- and SH3-domain containing protein EHSH1 [Rattus norvegicus]	R.LPEEPSS*EDEQQVEK.K	S335	0.383823	5.8532	4835853	Q9WVE9		396240	Casn_Kin2 (S335) 0.27%	4.65248e+07	7.79722e+07	1.70681e+07	202268	5.70312e+06	3.02335e+07	0.596685	84.3838	0.188636	912.388	912.389	912.388	912.388	912.386	912.39	30.193	2	2	2	2	2	2	5.80666	6.54139	5.47219	5.66958	3.79435	7.94507	5.3148	5.2606	5.4335	5.8532	5.1067	5.2709	25.5751	25.5751	27.6042	30.193	21.214
822182	EH- and SH3-domain containing protein EHSH1 [Rattus norvegicus]	R.SAFTPATATGSS*PSPVLGQGEK.V	S899*	0.211981	6.7037	4835853	Q15811	3898	396240		3.09389e+06	5.73025e+06	9.97436e+06	3.24005e+06	8.03545e+06	1.59667e+07	0.539923	3.07846	0.503263	1085.51	1085.52	1085.51	1085.51	1085.51		33.8039	2	2	2	2	2		0.211981	9.12431	5.5253	6.0875	5.1889		5.9934	6.334	6.7037	6.1573	5.9166		21.214	23.8995	33.8039	23.8995	19.0849
825144	EH- and SH3-domain containing protein EHSH1 [Rattus norvegicus]	R.SAFTPATATGSS*PS*PVLGQGEK.V	S899S901*	0.871121	6.2179	4835853	Q15811	3898	396240		6.45746e+06	8.57571e+06	462793	1.0053e+06	1.0537e+06	1.23274e+06	0.752994	0.460352	0.85476	1125.49		1125.49	1125.49			27.8211	2		2	2			3.04003		4.44892	1.91113			4.4204		6.2179	4.9947			12.4623		27.8211	22.2554
821891	EH- and SH3-domain containing protein EHSH1 [Rattus norvegicus]	R.SAFTPATATGSSPS*PVLGQGEK.V	S901*	0.170506	6.4307	4835853	Q15811	3898	396240		8.85388e+06	8.94714e+06	8.21571e+06	2.97737e+06	8.01693e+06	1.51136e+07	0.989577	2.75939	0.530447	1085.52	1085.51	1085.51	1085.51	1085.51	1085.52	13.4324	2	2	2	2	2	2	13.5113	6.4239	6.64971	5.9723	1.13824	15.8753	6.2829	6.1513	5.7949	6.2789	6.4307	6.2946	10.8814	10.8814	9.0759	13.4324	7.78151
826281	EH- and SH3-domain containing protein EHSH1 [Rattus norvegicus]	R.SAFTPATATGSSPS*PVLGQGEK.V	S901*	5.3594	4.3627	4835853	Q15811	3898	396240		1.369e+06	2138392	2.38475e+06	675273	2.19047e+06	2.98782e+06	0.640203	3.53154	0.733135	724.011	724.011	724.011	724.012			58.0006	3	3	3	3			5.80179	6.13819	5.54834	6.30409			3.9344	4.3627	4.13	3.3909			42.2669	58.0006	52.9315	33.224
826428	EH- and SH3-domain containing protein EHSH1 [Rattus norvegicus]	K.STS*IDTGPTEAPSSLK.R	S975	3.54929	3.5934	4835853	Q9WVE9		396240		2.24759e+06	1.9767e+06	117161	87563.6	9376.77	558931	1.13704	1.338	0.0167763		835.888					-0.315171		2						9.54651						3.5934
822217	EH domain binding protein Epsin [Rattus norvegicus]	R.TALPTS*GSSTGELELLAGEVPAR.S	S416	3.91242	4.4483	3249559	Q80VP1		403995		1.20369e+06	832685	1.36857e+06	851329	1.79577e+06	842394	1.44555	1.60757	2.13175	779.387	779.39	779.387	779.388	779.391		18.1532	3	3	3	3	3		3.91242	7.05005	3.98947	5.40205	8.06881		4.159	4.4483	3.3292	3.4875	3.4243		9.0759	12.043	10.3253	18.1532
826333	EH domain binding protein Epsin [Rattus norvegicus]	R.TALPTS*GSSTGELELLAGEVPAR.S	S416	8.94203	5.8898	3249559	Q80VP1		403995		2.76122e+06	1.53359e+06	29229.5	169779	1.99319e+06	1.66429e+06	1.80049	0.172162	1.19762	1168.59	1168.59					19.0849	2	2					18.6544	15.1016					5.4702	5.8898					12.0862	19.0849
822016	EH domain binding protein Epsin [Rattus norvegicus]	R.TALPTSGSS*TGELELLAGEVPAR.S	S419	1.33126	5.9429	3249559	Q80VP1		403995		2.76122e+06	1.53359e+06	870384	708022	3.01611e+06	2.10287e+06	1.80049	1.22932	1.43428	1168.58	1168.58	1168.58	1168.58	1168.59		76.7283	2	2	2	2	2		7.47382	8.41125	7.3668	4.96544	17.9224		5.9429	5.6975	5.6156	5.7966	5.7426		67.701	71.6986	76.7283	67.4031	67.701
826366	EH domain binding protein Epsin [Rattus norvegicus]	R.TALPTSGSS*TGELELLAGEVPAR.S	S419	3.75404	4.9788	3249559	Q80VP1		403995		1.18805e+06	832685	1.36857e+06	851329	1.73363e+06	827929	1.42677	1.60757	2.09394	779.391	779.389	779.387				76.6883	3	3	3				8.51398	5.71453	3.75404				4.4154	4.9788	4.378				67.6275	76.6883	54.6611
825528	EH domain binding protein Epsin [Rattus norvegicus]	R.KTPES*FLGPNAALVDLDSLVSR.P	S472	1.60634	5.9379	3249559	Q9Y6I3	6270	403995		19902.6	4309.9	187086	ND	183.8	ND	4.61787	187086	183.8			803.742				-0.315171			3						1.60634						5.9379
822588	EH domain binding protein Epsin [Rattus norvegicus]	R.TALPT*SGSSTGELELLAGEVPAR.S	T415	3.71124	5.2402	3249559	Q80VP1		403995		977903	1.34602e+06	865325	699774	1.98274e+06	2.15064e+06	0.726516	1.23658	0.921932	1168.59			1168.58	1168.58		10.7918	2			2	2		18.7571			6.74185	3.71124		3.8285			5.2402	4.1077						10.7918
826297	EH domain binding protein Epsin [Rattus norvegicus]	R.TALPTSGSST*GELELLAGEVPAR.S	T420	5.08957	4.6419	3249559	Q80VP1		403995		2.79796e+06	1.53359e+06	871746	711803	3.36358e+06	1.74279e+06	1.82445	1.2247	1.93	1168.58			1168.58			15.7978	2			2			6.80178			5.08957			4.6419			4.4741			12.0862			15.7978
826334	EH domain binding protein Epsin [Rattus norvegicus]	R.TALPTSGSST*GELELLAGEVPAR.S	T420	3.80541	4.3055	3249559	Q80VP1		403995		1.17995e+06	832685	123943	256181	626353	652205	1.41705	0.483809	0.960362	779.393						62.3765	3						10.8896						4.3055						62.3765
825460	EH domain binding protein Epsin [Rattus norvegicus]	R.KT*PESFLGPNAALVDLDSLVSR.P	T469	0.996178	6.1355	3249559	Q9Y6I3	6270	403995		19902.6	4309.9	187086	ND	183.8	ND	4.61787	187086	183.8			803.741				22.729			3						0.996178						6.1355						22.729
827071	EH-domain containing 2 [Rattus norvegicus]	R.GPDEAIEDGEEGS*EDDAEWVVTK.D	S438	15.2598	4.9537	66911991			402329	Casn_Kin2 (S338) 0.15%	268960	779718	821414	838006	45487.1	5589.03	0.344946	0.980201	8.13863		1279.03					65.1762		2						15.2598						4.9537						65.1762
824669	Eif3c protein [Rattus norvegicus] [MASS=105434]	K.QNPEQS*ADEDAEK.N	S166*	5.45246	3.4597	197246622	Q99613	4889	406010	Casn_Kin2 (S166) 0.53%	321130	432699	215595	112017	290667	1.46776e+06	0.742155	1.92466	0.198034						770.805	100						2						15.2797						3.4597
822708	Eif3c protein [Rattus norvegicus] [MASS=105434]	K.QPLLLS*EDEEDTKR.V	S39*	0.599039	2.6767	197246622	Q99613	4889	406010	Casn_Kin2 (S39) 0.31%	2.38014e+08	5.21473e+08	3.25703e+07	4.72147e+08	5.29006e+08	3.95306e+07	0.456426	0.0689834	13.3822	876.916	876.916	876.911	876.912	876.915	876.901	89.3265	2	2	2	2	2	2	10.9766	11.6726	5.12319	6.09876	9.58454	6.5039	2.5954	2.6005	2.4528	2.2087	2.6767	2.3008	60.9223	89.3265	77.2384	82.2844	83.4708
827068	Eif3c protein [Rattus norvegicus] [MASS=105434]	K.QPLLLS*EDEEDTK.R	S39*	9.24396	2.7581	197246622	Q99613	4889	406010	Casn_Kin2 (S39) 0.31%	1.39074e+06	2.39102e+06	5.18252e+06	7.45655e+06	843414	2.92705e+06	0.58165	0.69503	0.288145		798.863					116.815		2						9.24396						2.7581						116.815
823134	ELL associated factor 1 (predicted) [Rattus norvegicus] [MASS=38251]	K.T*SPLKDNPS*PEPQLDDIKR.E	T243S251*	1.96966	4.8776	149034174	Q96JC9	12209	406354		4.26041e+06	5.06571e+06	1.92796e+06	1.10585e+07	4.77501e+06	87746.1	0.841029	0.174342	54.4185	1155.53	1155.54	1155.53	1155.53	1155.54		89.9941	2	2	2	2	2		2.26402	12.4109	4.16441	3.95229	14.8393		4.4102	4.7146	3.8295	4.8776	4.2428		55.3471	71.5796	89.9941	71.5796	57.0225
825488	elongation factor [Rattus rattus]	R.LGQHVVGMAPLSVGS*LDDEPGGETETR.M	S269	0.321408	6.541	6002248	Q9CZR8				79364.6	392717	1.22906e+06	3.87587e+06	750060	78956.5	0.202091	0.317105	9.49967			944.439	944.435			58.0946			3	3					3.55314	0.392047					5.0801	6.541					27.5978	58.0946
824362	elongation factor 1 alpha [Rattus norvegicus]	R.EHALLAYT*LGVK.Q	T142*	3.1476	3.2119	56080	P13549	559	402140		11511.8	ND	328202	697459	2.2089e+06	374652	11511.8	0.470568	5.89588			697.86		697.864		13.8917			2		2				3.1476		9.18463				3.2119		3.0956				13.8917		7.59668
824336	elongation factor 1 alpha [Rattus norvegicus]	R.EHALLAY*TLGVK.Q	Y141*	3.49893	2.8188	56080	P13549	559	402140		28178	36083.8	328202	697459	2.21499e+06	468840	0.780906	0.470568	4.7244	697.865		697.86	697.862	697.861		13.8917	2		2	2	2		10.1454		3.75704	5.59971	4.37366		2.8188		2.531	2.5958	2.6733		9.77724		8.22355	13.0583	13.8917
826555	Endothelial cell growth factor 1 (platelet-derived) (predicted) [Rattus norvegicus] [MASS=49901]	K.ALCSGS*PTQR.R	S357	1.55644	3.1131	58477364	Q99N42		411165	Cdc2_Kin (S350) 0.7% Cdk5_Kin (S350) 0.72%	1.73907e+06	2.86728e+06	2.48601e+06	1.63617e+06	332253	3.05626e+06	0.606524	1.51941	0.108712		578.747	578.745				27.6809		2	2					4.2975	1.55644					3.112	3.1131					4.02739	27.6809
825751	endothelial monocyte activating polypeptide 2 [Rattus norvegicus] [MASS=34574]	R.S*ASVTTTTMTGGGGEEK.K	S108	3.68423	4.2645	34860578			401380		873169	2.71263e+06	479227	1.70545e+06	226244	1.24441e+06	0.32189	0.280996	0.181809		847.356		847.357			28.1954		2		2				3.68423		4.33369				4.2645		4.1495				28.1954		28.1518
823694	endothelial monocyte activating polypeptide 2 [Rattus norvegicus] [MASS=34574]	R.SAS*VTTTTMTGGGGEEK.K	S110	2.43846	5.1598	34860578			401380	1433_m1 (S110) 0.35% Akt_Kin (S110) 0.55% Clk2_Kin (S110) 0.61%	1.36265e+06	2.69434e+06	479227	1.7111e+06	230382	1.2517e+06	0.505744	0.280069	0.184055		847.358		847.357		847.361	9.77724		2		2		2		5.48501		5.27246		9.16329		5.1598		4.711		5.014		8.22355		9.77724
824320	enoyl-Coenzyme A, hydratase/3-hydroxyacyl Coenzyme A dehydrogenase [Rattus norvegicus]	K.TASAQPVSSVGVLGLGT*MGR.G	T306	3.18097	6.4438	19424318	Q9DBM2		396124		4402.55	169667	3636.95	29132.3	283912	125540	0.0259482	0.124842	2.26152					984.482		107.689					2						3.18097						6.4438						107.689
827526	ENP [Mus musculus]	K.RGLS*QAAEER.I	S23	5.3237	2.2393	6630607					2.84772e+06	3.09722e+06	ND	883619	ND	56524.9	0.919444	1.13171e-06	1.76913e-05		598.771					100		2						5.3237						2.2393						100
822367	epidermal growth factor receptor pathway substrate 15 [Rattus norvegicus] [MASS=98613]	K.LDS*SDPFKLNDPFQPFPGNDSPK.E	S797	6.54758	4.5143	154425473			400888		ND	78350.7	ND	ND	338357	ND	1.27631e-05	1	338357					881.404		16.9461					3						6.54758						4.5143						16.9461
824523	epidermal growth factor receptor pathway substrate 15 [Rattus norvegicus] [MASS=98613]	K.LDS*SDPFK.L	S797	1.98299	3.3684	154425473			400888		8.39602e+06	948856	343957	ND	7108.93	990720	8.84856	343957	0.00717553	494.707					494.714	30.193	2					2	4.3302					17.6747	3.3684					2.8506	30.193
826435	epidermal growth factor receptor pathway substrate 15 [Rattus norvegicus] [MASS=98613]	K.LDS*SDPFK.L	S797	6.94045	1.7294	154425473			400888		789585	986616	341148	403643	35080.3	222645	0.800296	0.845172	0.157561	988.41	988.413					16.9461	1	1					7.6183	10.5219					1.7294	1.6976					16.9461	16.9461
823784	epidermal growth factor receptor pathway substrate 15 isoform B [Rattus norvegicus]	R.FHDS*SSPLLTSGTSVAELPWAVK.S	S106	1.97274	4.9486	37779543			400888		77661.5	14390.7	981544	2.42617e+06	373459	1.20139e+06	5.39666	0.404565	0.310857			837.074	837.075		837.079	10.9691			3	3		3			1.97274	4.1248		8.13798			4.8403	4.2135		4.9486			10.9691	10.048
822734	epidermal growth factor receptor pathway substrate 15 isoform B [Rattus norvegicus]	R.FHDSSS*PLLTSGTSVAELPWAVK.S	S108	2.37127	4.8829	37779543			400888		72942.2	5676.3	981544	36500.7	373459	1.20139e+06	12.8503	26.8911	0.310857			837.074		837.079		12.2175			3		3				2.37127		8.20972				4.6237		4.8829				5.84331		12.2175
823218	epidermal growth factor receptor pathway substrate 15 isoform B [Rattus norvegicus]	K.NTIGSS*PVADFSAIK.E	S324	2.13014	5.2175	37779543			400888		393950	843012	2.76181e+06	367018	602990	963691	0.467312	7.525	0.625709	793.884	793.888	793.879	793.882	793.892	793.892	33.8039	2	2	2	2	2	2	8.70957	13.5937	3.35906	6.59206	18.6668	18.7487	3.8143	4.43	5.2175	4.7851	3.8634	2.9475	16.9461	33.8039	27.6042	25.5751	30.193
823229	epidermal growth factor receptor pathway substrate 15, related; epidermal growth factor pathway substrate 15, related sequence [Mus musculus]	K.SGLS*DIILGK.I	S49	1.95834	2.935	6679669	Q9UBC2	9445			2.16495e+06	1.22968e+06	4.93601e+06	9.37067e+06	2.39071e+06	5.66128e+06	1.76057	0.526751	0.422291	541.782	541.783	541.779	541.78	541.783		8.94362	2	2	2	2	2		6.46618	8.38754	1.95834	2.74352	8.04576		2.2119	2.9119	2.7377	2.7814	2.935		6.37239	8.94362	7.42694	7.42694	7.34803
827264	Epidermal growth factor receptor pathway substrate 15-like 1 [Rattus norvegicus] [MASS=96446]	R.STPS*HGSVSSLNSTGSLS*PK.H	S241S255*	3.88537	4.6794	67678290	Q9UBC2	9445	402994	Cdk5_Kin (S255) 0.11% Cdc2_Kin (S255) 0.27% Erk1_Kin (S255) 0.38%	2.82701e+06	2706507	840252	1.18184e+06	524582	40948	1.04452	0.71097	12.8109		697.305	697.303	697.304			15.8988		3	3	3				7.21566	4.93805	6.77545				3.5439	4.286	4.6794				14.0274	13.9086	15.8988
827303	Epidermal growth factor receptor pathway substrate 15-like 1 [Rattus norvegicus] [MASS=96446]	R.STPSHGS*VSSLNSTGSLS*PK.H	S244S255*	4.32558	4.1647	67678290	Q9UBC2	9445	402994	Cdk5_Kin (S255) 0.11% Cdc2_Kin (S255) 0.27% Erk1_Kin (S255) 0.38%	2.82701e+06	2706507	840252	1.18184e+06	524582	40948	1.04452	0.71097	12.8109		697.305	697.303	697.304			13.1817		3	3	3				7.2348	4.84235	6.07686				3.3492	4.0917	4.1647				6.93942	13.1817	10.6025
822660	Epidermal growth factor receptor pathway substrate 15-like 1 [Rattus norvegicus] [MASS=96446]	R.STPSHGSVSSLNSTGSLS*PK.H	S255*	0.194038	4.6212	67678290	Q9UBC2	9445	402994	Cdk5_Kin (S255) 0.11% Cdc2_Kin (S255) 0.27% Erk1_Kin (S255) 0.38%	4.51438e+06	7.33893e+06	2.36981e+06	2.42386e+06	2.54872e+06	4.48875e+06	0.615128	0.977702	0.567803	670.647	670.647	670.645	670.645	670.65	670.65	26.7778	3	3	3	3	3	3	4.70166	3.93049	2.015	1.83589	8.30375	8.39331	3.2351	3.6044	3.6343	4.6212	3.3126	3.9884	8.41041	25.5284	26.7778	26.7342	19.1645
824025	Epidermal growth factor receptor pathway substrate 15-like 1 [Rattus norvegicus] [MASS=96446]	R.STPSHGSVSSLNSTGSLS*PK.H	S255*	8.91571	4.551	67678290	Q9UBC2	9445	402994	Cdk5_Kin (S255) 0.11% Cdc2_Kin (S255) 0.27% Erk1_Kin (S255) 0.38%	1.9769e+07	2.58795e+07	190835	963556	1.73268e+07	630109	0.763887	0.198053	27.4981						1005.47	34.6479						2						8.91571						4.551
824597	epithelial protein lost in neoplasm [Rattus norvegicus] [MASS=83797]	K.GENEETLGRPAQPPSAGETPHS*PGVEDAPIAK.V	S488	0.126562	6.1537	149032054			406232		1.77141e+06	3.55852e+06	4.66139e+06	2.94694e+06	1.23552e+06	2.37408e+06	0.497794	1.58177	0.520422	1106.85	1106.85	1106.85	1106.85		1106.87	89.7284	3	3	3	3		3	4.69483	6.8102	4.69483	4.05299		19.0593	4.5037	5.6925	5.8278	6.1537		4.9521	45.1738	64.2614	59.7678	68.9437
824933	epithelial protein lost in neoplasm [Rattus norvegicus] [MASS=83797]	R.PAQPPSAGETPHS*PGVEDAPIAK.V	S488	1.74447	4.1844	149032054			406232		1.5728e+06	1985335	2.57838e+06	1214149	3.62627e+06	4.97588e+06	0.792208	2.12361	0.728771	778.367		778.368				53.4379	3		3				1.74447		3.45893				4.1785		4.1844				45.2616		53.4379
823231	epithelial protein lost in neoplasm [Rattus norvegicus] [MASS=83797]	R.S*PLEPESPGWPGFGDTTTAK.E	S697	1.2303	4.7333	149032054			406232		8.85814e+06	484721	1.43555e+07	1.76255e+07	4.06255e+06	3.28395e+07	18.2747	0.814476	0.123709	1077.49	1077.49	1077.48	1077.48	1077.49	1077.49	96.6032	2	2	2	2	2	2	15.1719	18.4588	4.28979	5.53865	14.9445	15.1719	4.0068	3.5017	4.4735	4.7325	4.7333	4.3792	46.7796	63.6816	75.8551	96.6032	58.4755
823234	epithelial protein lost in neoplasm [Rattus norvegicus] [MASS=83797]	R.SPLEPES*PGWPGFGDTTTAK.E	S703	2.02419	4.5787	149032054			406232		8.92966e+06	4.04555e+06	9.11681e+06	1.00659e+07	1.362e+06	3.2918e+07	2.20728	0.905713	0.0413755	1077.49		1077.48		1077.49		64.2974	2		2		2		13.4728		2.02419		9.50341		4.4311		3.792		4.5787		64.2974		42.2999		42.3435
823095	epithelial protein lost in neoplasm isoform beta; EPLIN [Rattus norvegicus] [MASS=16471]	K.NNTES*LPQHFR.R	S48	2.03849	3.4527	48526711			406232		673766	4.64505e+06	7.23959e+06	3.96931e+06	3.63497e+06	8.66402e+06	0.14505	1.82389	0.419548				711.813	711.819	711.819	44.9354				2	2	2				2.03849	9.75658	9.93231				2.0873	3.4527	3.0963				27.6809	42.4279
822405	eps8 binding protein [Rattus norvegicus]	R.TNPPTQKPPS*PPVSGR.G	S178	1.56336	3.3314	5882255	Q8CBW3		417050	p38_Kin (S93) 0.31% GSK3_Kin (S93) 0.38% Cdc2_Kin (S93) 0.74%	2.23388e+06	6.54819e+06	2.13302e+06	9.95139e+06	2.98972e+06	8381974	0.341146	0.214344	0.356685	870.431	870.436		870.43	870.426	870.435	58.0006	2	2		2	2	2	4.04631	9.73064		2.50596	2.05766	8.46619	2.7231	2.6671		2.9716	3.0765	3.3314	37.1361	39.8127		58.0006	44.3857
821974	EPS8-like 2 (predicted), isoform CRA_a [Rattus norvegicus] [MASS=75575]	R.QSILPPPQS*PAPIPFQR.Q	S143	1.84844	3.6469	149061606			405549	Erk1_Kin (S204) 0.02% p38_Kin (S204) 0.08% GSK3_Kin (S204) 0.61%	614855	431629	1.17292e+06	829036	6.68689e+06	1.60385e+06	1.4245	1.4148	4.16926				977.009	977.01	977.011	93.1578				2	2	2				5.59649	6.84583	8.16174				2.9844	3.6469	3.0237				93.1578	84.9957
828040	EPS8-like 2 (predicted), isoform CRA_a [Rattus norvegicus] [MASS=75575]	R.QSILPPPQS*PAPIPFQR.Q	S143	2.74449	3.7485	149061606			405549	Erk1_Kin (S204) 0.02% p38_Kin (S204) 0.08% GSK3_Kin (S204) 0.61%	96926.1	21486	691833	576583	1721584	16565.8	4.51114	1.19988	103.924			651.674	651.676			65.4591			3	3					4.80797	6.49766					3.7485	3.5743					64.1647	65.4591
823517	EPS8-like 2 (predicted), isoform CRA_a [Rattus norvegicus] [MASS=75575]	K.YWGPAS*PTHK.L	S512	0.228847	3.1958	149061606	Q9H6S3	10940	405549	Cdc2_Kin (S573) 0.08% Cdk5_Kin (S573) 0.11% Erk1_Kin (S573) 0.34% p38_Kin (S573) 0.43%	8.47257e+06	7.56601e+06	2.83582e+06	3.89975e+06	463495	1766696	1.11982	0.727179	0.262351	612.269	612.267	612.268	612.267		612.268	38.1697	2	2	2	2		2	5.45961	1.46298	3.06491	1.16875		2.95866	2.8839	2.6683	3.1958	2.3242		2.9147	38.1697	24.306	34.1535	17.7936
822741	ERC1b [Rattus norvegicus]	R.SVGKVEPSSQS*PGRS*PR.L	S17S21	5.50433	4.0832	23664282	Q8IUD2	6181	414597	GSK3_Kin (S21) 0.17% Cdc2_Kin (S21) 0.29% Cdk5_Kin (S21) 0.43% Cdk5_Kin (S17) 0.66% Cdc2_Kin (S17) 0.75%	ND	752780	210837	313565	405785	435788	1.32841e-06	0.672385	0.931153					957.932	957.933	20.6416					2	2					5.50433	6.33467					3.8228	4.0832					20.6416
825781	ERC1b [Rattus norvegicus]	K.VEPSSQS*PGRS*PR.L	S17S21	2.68198	3.4075	23664282	Q8IUD2	6181	414597	GSK3_Kin (S21) 0.17% Cdc2_Kin (S21) 0.29% Cdk5_Kin (S21) 0.43% Cdk5_Kin (S17) 0.66% Cdc2_Kin (S17) 0.75%	700698	2.36391e+06	1.69299e+06	588590	140166	109271	0.296415	2.87634	1.28274	772.322	772.321	772.321	772.322			59.5579	2	2	2	2			4.58009	2.68198	3.31685	4.42462			3.4075	3.1168	3.2282	3.1252			28.0632	33.407	59.5579	39.5146
823470	ERM-binding phosphoprotein [Rattus norvegicus]	R.S*ASSDTSEELNAQDSPK.R	S285*	0.0108358	6.7778	8132349	Q9JJ19		396879		3.40819e+08	4.97315e+08	1.06458e+08	1.66892e+08	1.42062e+06	1.54515e+08	0.685318	0.637886	0.00919409	923.379	923.384	923.377	923.376	923.384	923.384	26.1101	2	2	2	2	2	2	6.4039	12.0926	4.48599	3.55954	12.4881	12.1576	5.6565	6.1382	6.3622	6.7778	5.3449	5.4706	26.1101	24.1683	26.1101	26.1101	22.5438
825073	ERM-binding phosphoprotein [Rattus norvegicus]	R.S*ASSDTS*EELNAQDSPK.R	S285S291*	2.38873	5.3947	8132349	Q9JJ19		396879		8.94359e+06	1.26992e+07	3.30795e+06	4.72057e+06	397483	1.23756e+06	0.704261	0.700752	0.321183	963.361	963.366		963.358			28.6576	2	2		2			5.30712	10.6298		2.38873			4.4576	4.9279		5.3947			18.1432	28.6576		26.3684
826462	ERM-binding phosphoprotein [Rattus norvegicus]	R.S*ASSDTSEELNAQDS*PK.R	S285S299*	4.79822	5.876	8132349	Q9JJ19		396879	Cdk5_Kin (S299) 0.06% Cdc2_Kin (S299) 0.13%	525760	1.26999e+07	2.69518e+06	1.46814e+06	268889	2.15382e+06	0.0413986	1.83578	0.124843	963.366	963.361	963.362				66.5398	2	2	2				10.4272	4.79822	5.6862				4.1598	4.7406	5.876				30.9267	51.052	66.5398
825254	ERM-binding phosphoprotein [Rattus norvegicus]	R.S*ASSDT*SEELNAQDSPK.R	S285T290*	4.16469	5.4329	8132349	Q9JJ19		396879		2.98753e+06	1.27211e+07	2.69518e+06	964321	409354	2.15382e+06	0.234849	2.7949	0.19006		963.369	963.363	963.361			16.0206		2	2	2				13.735	7.31155	5.30712				5.0899	5.4329	4.2302				16.0206	13.9355	15.954
822117	ERM-binding phosphoprotein [Rattus norvegicus]	R.SAS*SDTSEELNAQDSPK.R	S287*	0.0108358	6.8258	8132349	Q9JJ19		396879		3.40856e+08	4.97745e+08	1.06465e+08	1.66843e+08	102606183	1.54902e+08	0.684801	0.638117	0.662396	923.385	923.383	923.382	923.379	923.383	923.386	30.3253	2	2	2	2	2	2	12.5585	11.4316	9.31326	6.73439	10.9711	14.0105	6.2166	6.765	6.8258	5.759	5.6853	6.5421	10.7918	13.9794	30.3253	13.9794
826460	ERM-binding phosphoprotein [Rattus norvegicus]	R.SAS*SDTSEELNAQDSPK.R	S287*	2.93107	5.5694	8132349	Q9JJ19		396879		529051	5.22154e+06	3.0453e+06	1.87951e+06	337081	106408	0.101321	1.62027	3.16781		615.921	615.92				7.23456		3	3					5.37451	3.0936					5.5694	5.0895					6.6281	7.23456
825183	ERM-binding phosphoprotein [Rattus norvegicus]	R.SAS*S*DTSEELNAQDSPK.R	S287S288*	4.60608	5.1123	8132349	Q9JJ19		396879		472201	1.06475e+06	26041.4	119189	34384.3	7364.43	0.443485	0.218488	4.66896				963.361			-0.132283				2						4.60608						5.1123
823471	ERM-binding phosphoprotein [Rattus norvegicus]	R.SAS*SDTS*EELNAQDSPK.R	S287S291*	1.63057	5.943	8132349	Q9JJ19		396879		8.9793e+06	1.858e+07	3.72298e+06	4.72176e+06	327851	1.63508e+06	0.483278	0.788472	0.20051	963.364	963.36	963.36	963.362		963.371	23.8917	2	2	2	2		2	8.28261	4.28932	3.65579	6.38204		15.511	4.4971	4.9966	5.8767	5.943		5.1447	13.9319	21.5061	23.4666	23.8917
826262	ERM-binding phosphoprotein [Rattus norvegicus]	R.SAS*SDTSEELNAQDS*PK.R	S287S299*	3.67656	5.8609	8132349	Q9JJ19		396879	Cdk5_Kin (S299) 0.06% Cdc2_Kin (S299) 0.13%	9.0914e+06	1.85812e+07	2.69636e+06	1.47086e+06	409354	2.15382e+06	0.489279	1.83319	0.19006	963.37	963.37	963.361	963.362			58.9011	2	2	2	2			13.9895	14.4309	4.60608	5.74851			5.2533	5.8609	5.6728	5.4625			54.3029	51.0335	58.9011	51.0355
827207	ERM-binding phosphoprotein [Rattus norvegicus]	R.SAS*SDTSEELNAQDS*PKR.H	S287S299*	7.84409	4.5459	8132349	Q9JJ19		396879	Cdk5_Kin (S299) 0.06% Cdc2_Kin (S299) 0.13%	167117	531256	162948	53812.3	ND	34762.7	0.314569	3.02808	2.87665e-05		694.612					23.0641		3						7.84409						4.5459						23.0641
825178	ERM-binding phosphoprotein [Rattus norvegicus]	R.SAS*SDT*SEELNAQDSPK.R	S287T290*	2.38873	5.0848	8132349	Q9JJ19		396879		3.15626e+06	1.26864e+07	3.72241e+06	1.12524e+06	397483	1.51439e+06	0.248791	3.30811	0.262471	963.363	963.369	963.362	963.36			15.9662	2	2	2	2			7.46215	13.5429	5.94065	3.97256			4.6978	4.7588	5.0848	4.8636			8.38438	15.4627	15.9662	8.38438
826532	ERM-binding phosphoprotein [Rattus norvegicus]	R.SAS*SDT*S*EELNAQDSPK.R	S287T290S291*	4.16816	3.3083	8132349	Q9JJ19		396879		163725	2.36549e+06	ND	85352.4	ND	42404.7	0.069214	1.17161e-05	2.35823e-05		1003.34					10.6697		2						4.16816						3.3083						10.6697
824021	ERM-binding phosphoprotein [Rattus norvegicus]	R.SASS*DTSEELNAQDSPKR.H	S288*	16.8043	3.1553	8132349	Q9JJ19		396879		ND	ND	ND	ND	ND	ND	1	1	1						1001.44	-0.457575						2						16.8043						3.1553
824562	ERM-binding phosphoprotein [Rattus norvegicus]	R.SASS*DTSEELNAQDSPK.R	S288*	0.520117	5.4169	8132349	Q9JJ19		396879		3.34844e+08	2.99175e+08	1.01168e+08	1.67125e+08	1.02619e+08	1.54602e+08	1.11923	0.605343	0.66376	923.379	923.381	923.378	923.375		923.378	16.8142	2	2	2	2		2	6.07341	9.18323	5.6129	1.84208		5.14696	5.0934	5.3122	4.7285	5.4169		4.2424	7.79356	2.64818	16.8142	15.563
825072	ERM-binding phosphoprotein [Rattus norvegicus]	R.SASS*DTS*EELNAQDSPK.R	S288S291*	0.867214	5.8633	8132349	Q9JJ19		396879		9.0914e+06	1.85812e+07	3.72298e+06	4.71212e+06	327851	103216	0.489279	0.790086	3.17637	963.365	963.362	963.358	963.359			23.5036	2	2	2	2			9.3004	5.62388	1.56306	2.95995			4.2022	4.8076	5.8633	5.0558			17.6989	22.5786	23.5036	22.5786
827217	ERM-binding phosphoprotein [Rattus norvegicus]	R.SASS*DTSEELNAQDS*PK.R	S288S299*	6.408	3.8678	8132349	Q9JJ19		396879	Cdk5_Kin (S299) 0.06% Cdc2_Kin (S299) 0.13%	78506.7	747832	105692	13988.3	2981.63	11837.4	0.104979	7.55573	0.251882		642.577					31.2686		3						6.408						3.8678						31.2686
826316	ERM-binding phosphoprotein [Rattus norvegicus]	R.SASS*DT*SEELNAQDSPK.R	S288T290*	6.89094	3.6897	8132349	Q9JJ19		396879		2.98753e+06	4.41907e+06	1.55238e+06	2.23471e+06	258426	1.34154e+06	0.676054	0.694668	0.192634	963.366	963.363					8.36164	2	2					9.93393	6.89094					3.5717	3.6897					6.83445	8.36164
825085	ERM-binding phosphoprotein [Rattus norvegicus]	R.SASS*DT*S*EELNAQDSPK.R	S288T290S291*	0.458699	5.7909	8132349	Q9JJ19		396879		401844	2.36627e+06	250250	371558	ND	130367	0.169822	0.673516	7.67065e-06		1003.35	1003.35	1003.35			44.7133		2	2	2				5.87331	7.85267	6.11762				3.2301	3.9785	5.7909				12.7459	6.96624	44.7133
824593	ERM-binding phosphoprotein [Rattus norvegicus]	R.SASSDTS*EELNAQDSPK.R	S291*	0.0758504	6.1189	8132349	Q9JJ19		396879		3.25459e+06	4.39402e+06	695324	765365	4.84472e+07	1.54534e+08	0.740687	0.908487	0.313506	923.381	923.381	923.378	923.378		923.387	39.9127	2	2	2	2		2	9.24824	8.45725	5.63999	5.41244		15.5328	6.1189	4.9045	5.8639	5.1559		5.8099	33.8039	39.9127	33.8039	39.9127
826257	ERM-binding phosphoprotein [Rattus norvegicus]	R.SASSDTS*EELNAQDSPK.R	S291*	0.910204	5.2807	8132349	Q9JJ19		396879		7.73718e+06	5.72912e+06	3.04661e+06	1.87828e+06	337081	529041	1.3505	1.62202	0.637155	615.918		615.921				12.3145	3		3				0.910204		6.06799				4.3153		5.2807				12.3145		4.58638
825168	ERM-binding phosphoprotein [Rattus norvegicus]	R.SASSDTSEELNAQDS*PK.R	S299*	0.0758504	5.8632	8132349	Q9JJ19		396879	Cdk5_Kin (S299) 0.06% Cdc2_Kin (S299) 0.13%	3.25963e+07	9.85514e+07	3.96201e+06	3.62978e+06	9.82126e+06	2.16498e+06	0.330754	1.09153	4.53641	923.382	923.38	923.373	923.377			219.073	2	2	2	2			10.1097	7.33035	0.0758504	4.22593			5.0394	5.8632	3.8775	5.333			193.23	194.99	219.073	139.156
826255	ERM-binding phosphoprotein [Rattus norvegicus]	R.SASSDT*SEELNAQDSPK.R	T290*	1.8475	6.0822	8132349	Q9JJ19		396879		7.49131e+06	5.22154e+06	3.0453e+06	1.87951e+06	337081	524860	1.43469	1.62027	0.642231	615.92	615.921	615.921				5.92917	3	3	3				3.47285	5.77001	5.17405				4.8783	6.0822	5.787				2.4677	4.02739	5.92917
826491	ERM-binding phosphoprotein [Rattus norvegicus]	R.SASSDT*SEELNAQDSPK.R	T290*	5.0982	3.8466	8132349	Q9JJ19		396879		2.60227e+06	923143	19110.7	5704.98	64385.9	328768	2.81893	3.34983	0.19584		923.378					10.8814		2						5.0982						3.8466						10.8814
824303	erythroid spectrin beta [Rattus norvegicus] [MASS=246327]	R.LSS*SWESLLPEPAHPF.-	S2124	3.78292	2.9481	33303720	P15508		398941	Clk2_Kin (S2115) 0.83%	668918	88801.2	1.15398e+06	1.3303e+06	43779.4	25135.5	7.53276	0.867463	1.74174			938.933		938.936		-0.409586			2		2				3.78292		6.96907				2.9481		2.9141
823304	EST AA437822 [Mus musculus]	R.TAS*NPKVENEDEPVR.L	S294	1.34861	5.3343	28492259	Q8BKC8			1433_m1 (S294) 0.61%	12011.6	4.9306e+06	2.39113e+06	3.51288e+06	1.541e+06	5649.23	0.00243613	0.680675	272.781		588.935		588.933	588.938		31.4588		3		3	3			5.19042		2.18157	10.7944			4.8403		5.3343	4.8762			31.4588		25.2895	22.6557
824258	EST AA437822 [Mus musculus]	R.TAS*NPKVENEDEPVR.L	S294	1.49593	2.8746	28492259	Q8BKC8			1433_m1 (S294) 0.61%	8.69285e+06	6.52015e+06	4.6364e+06	5.72713e+06	5.42893e+06	2.81623e+06	1.33323	0.80955	1.92773	882.899	882.901	882.895	882.895	882.906	882.906	11.9539	2	2	2	2	2	2	5.85339	7.99527	1.84159	1.49593	14.0865	14.2225	2.8746	2.2043	2.7303	2.1188	2.3261	2.1976	7.59668		11.9539
825594	Estrogen receptor-binding fragment-associated gene 9 (predicted) [Rattus norvegicus]	R.KLS*GDQITLPTTVDYSSVPK.Q	S36*	3.2883	5.4337	56268883	Q865S0	5775	397428	Akt_Kin (S36) 0.21% PKA_Kin (S36) 0.81%	ND	42533.2	79066.6	1.13187e+06	5169.2	228142	2.3511e-05	0.0698549	0.0226578				1115.06			90.0827				2						3.2883						5.4337						90.0827
823479	ethylmalonic encephalopathy 1 (predicted) [Rattus norvegicus]	R.RLS*QQSASGAPVLLR.Q	S14	0.414946	4.2421	149056650	Q9DCM0		406614	ATM_Kin (S14) 0.07% PKA_Kin (S14) 0.4%	2.3251e+06	4.84714e+06	717840	1.03127e+07	571268	1.00086e+07	0.479685	0.0696075	0.057078	831.947	831.946	831.94	831.94	831.946	831.94	67.701	2	2	2	2	2	2	10.6502	9.62183	2.7242	1.99053	9.39933	2.13486	3.5074	3.444	4.2421	3.896	3.9594	3.5722	43.4475	55.8469	46.8588	55.8469	39.3892
824819	ethylmalonic encephalopathy 1 (predicted) [Rattus norvegicus]	R.RLSQQS*ASGAPVLLR.Q	S17	1.28092	4.0178	149056650	Q9DCM0		406614		847659	201365	51179.4	341876	20255.7	553254	4.20957	0.149702	0.036612				554.962			21.7173				3						1.28092						4.0178						21.7173
824710	eukaryotic initiation factor 5 (eIF-5) [Rattus norvegicus]	K.GLTLS*DDLER.T	S227	11.5807	2.829	9910214	P59325		408469		151888	5539.43	103576	83474	15027.9	64834.1	27.4195	1.24081	0.23179						599.778	53.8485						2						11.5807						2.829
826945	eukaryotic initiation factor 5 (eIF-5) [Rattus norvegicus]	K.EAEEES*S*GGEEEDEDENIEVVYSK.T	S387S388*	3.51498	4.5656	9910214	P55010	3417	408469	Casn_Kin2 (S388) 0.05% Casn_Kin2 (S387) 0.09%	4.14397e+06	713869	8.94381e+06	6.42568e+06	649936	1.88814e+06	5.80494	1.39189	0.344221	1431.54		1431.52				179.496	2		2				14.4336		3.51498				4.5656		3.7164				179.496		115.285
826946	eukaryotic initiation factor 5 (eIF-5) [Rattus norvegicus]	K.EAEEES*S*GGEEEDEDENIEVVYSK.T	S387S388*	10.6112	5.3934	9910214	P55010	3417	408469	Casn_Kin2 (S388) 0.05% Casn_Kin2 (S387) 0.09%	4.33804e+06	1.32211e+06	2.09682e+06	4.25235e+06	57470.7	356293	3.28116	0.493098	0.161302	954.691						136.466	3						10.6112						5.3934						136.466
823200	eukaryotic initiation factor 5 (eIF-5) [Rattus norvegicus]	K.VETVKS*DNKDDDIDIDAI.-	S417	3.77949	4.2428	9910214	P55010	3417	408469		763186	61552	498515	1.06586e+06	881157	895497	12.399	0.467713	0.983987	1042.97				1042.98		48.6251	2				2		3.77949				14.9547		3.6366				4.2428		38.1697				48.6251
824559	eukaryotic initiation factor eIF-2B beta subunit [Rattus norvegicus]	R.ET*LGLLR.R	T38	3.67575	1.5653	2149254	P49770	5923	398609		216396	259233	ND	85786.1	ND	191025	0.834755	1.16569e-05	5.2349e-06						881.452	100						1						3.67575						1.5653
823191	eukaryotic translation elongation factor 1 delta (guanine nucleotide exchange protein), isoform CRA_c [Rattus norvegicus] [MASS=30801]	K.VMLPNS*PETLGQATPR.T	S47	2.16656	4.0708	149066166					1.04033e+06	694017	2.3635e+06	309257	1.11111e+06	1.19192e+06	1.499	7.6425	0.932199	895.934		895.931		895.923	895.944	26.1646	2		2		2	2	5.37172		2.6412		6.9018	17.2987	3.1017		3.5285		2.9277	4.0708	7.31499		26.1646		12.1748
826241	eukaryotic translation elongation factor 1-delta [Mus musculus]	K.DIDLFGS*DEEEEDKEAAR.L	S162*	5.47517	3.6607	10442752	P57776			Casn_Kin2 (S162) 0.17% ATM_Kin (S162) 0.59%	310200	ND	ND	ND	2325.37	79610.2	310200	1	0.0292094	716.631						100	3						5.61019						3.6607						100
824256	eukaryotic translation elongation factor 2 [Rattus norvegicus]	R.AGETRFT*DTR.K	T57*	0.0243205	2.3121	8393296	P29691	561	412138		3.07872e+07	2.96417e+07	4.1022e+07	9.85345e+07	1.15683e+07	2.96797e+06	1.03865	0.416321	3.89771	617.267	617.269	617.266	617.267	617.27		58.0215	2	2	2	2	2		1.36195	4.23175	0.624227	0.0243205	5.51262		2.1271	2.274	2.3121	2.1042	2.0988		51.3101	39.3892	44.9354	58.0215	28.396
824839	eukaryotic translation elongation factor 2 [Rattus norvegicus]	R.AGETRFT*DTR.K	T57*	0.0162137	3.1594	8393296	P29691	561	412138		1.31806e+07	2.65907e+07	1.36211e+07	1.97675e+07	ND	350179	0.495684	0.689066	2.85568e-06	411.848	411.848	411.847	411.847			28.8472	3	3	3	3			2.732	2.58608	0.0162137	0.356701			3.1594	2.8728	3.0405	3.0742			27.2817	16.8385	28.8472	20.494
822032	Eukaryotic translation initiation factor 3, subunit 4 (delta) (predicted) [Rattus norvegicus]	K.GIPLPTGDTS*PEPELLPGDPLPPPK.E	S42*	2.59726	4.8468	55778376	Q9Z1D1		407029	GSK3_Kin (S42) 0.49% Erk1_Kin (S42) 0.61%	4.06529e+06	2.84492e+06	2.99406e+07	2.88219e+07	2.49343e+06	3.11397e+06	1.42897	1.03881	0.800722	1307.68	1307.68	1307.66	1307.67	1307.65	1307.68	30.193	2	2	2	2	2	2	14.7723	18.0389	5.15239	6.92722	2.59726	16.7307	4.609	4.8468	4.2982	4.3028	4.7378	4.3425	27.6042	30.193	27.6042	25.5751	22.4677
822984	Eukaryotic translation initiation factor 3, subunit 4 (delta) (predicted) [Rattus norvegicus]	K.GIPLPTGDTS*PEPELLPGDPLPPPK.E	S42*	2.36774	4.795	55778376	Q9Z1D1		407029	GSK3_Kin (S42) 0.49% Erk1_Kin (S42) 0.61%	8.08272e+06	8.78731e+06	1.04e+07	1.74855e+07	4.77167e+07	4.62879e+07	0.919817	0.59478	1.03087	872.115	872.117	872.109	872.109	872.12	872.122	29.8287	3	3	3	3	3	3	9.87633	11.4063	2.36774	3.07155	15.1166	17.9165	4.2694	4.3603	4.3861	4.6398	4.795	4.5552	11.3033	7.78151	4.02739		29.8287
826057	Eukaryotic translation initiation factor 3, subunit 4 (delta) (predicted) [Rattus norvegicus]	K.GIPLPT*GDTSPEPELLPGDPLPPPK.E	T38*	1.80927	4.9772	55778376	Q9Z1D1		407029	GSK3_Kin (T38) 0.2%	4.49144e+06	8.78731e+06	2.8268e+07	2.87221e+07	4.77167e+07	3.5916e+07	0.511128	0.984189	1.32856	872.115			872.108			7.9588	3			3			9.4441			1.80927			4.9264			4.9772			2.59637			7.9588
827840	Eukaryotic translation initiation factor 3, subunit 4 (delta) (predicted) [Rattus norvegicus]	K.GIPLPT*GDT*SPEPELLPGDPLPPPK.E	T38T41*	1.27678	4.3716	55778376	Q9Z1D1		407029	GSK3_Kin (T38) 0.2%	2.27319e+06	1.87579e+06	5.19641e+06	1.06648e+07	2.29109e+06	71933.5	1.21186	0.487248	31.85			1347.64				8.16012			2						1.27678						4.3716						8.16012
822221	Eukaryotic translation initiation factor 3, subunit 4 (delta) (predicted) [Rattus norvegicus]	K.GIPLPTGDT*SPEPELLPGDPLPPPK.E	T41*	3.06392	4.5488	55778376	Q9Z1D1		407029		4.06529e+06	3469089	4.48984e+06	2.88219e+07	950108	2.19535e+07	1.17186	0.155779	0.0432783	1307.68	1307.68	1307.66	1307.67	1307.68		30.7224	2	2	2	2	2		17.8515	19.1596	5.24802	6.83542	15.4264		4.5488	4.2526	4.2118	4.4062	4.133		30.5262	29.8691	21.4123	30.7224	9.77724
823720	Eukaryotic translation initiation factor 3, subunit 4 (delta) (predicted) [Rattus norvegicus]	K.GIPLPTGDT*SPEPELLPGDPLPPPK.E	T41*	1.10928	4.7692	55778376	Q9Z1D1		407029		4.47947e+06	8.79121e+06	1.36333e+07	4.47692e+07	3.2542e+07	1.44248e+07	0.509539	0.304524	2.25597	872.113	872.119	872.11	872.111	872.114	872.108	47.939	3	3	3	3	3	3	7.1988	14.0647	3.84039	4.81961	8.74412	1.31966	4.6364	3.9293	4.1614	4.7692	4.4388	4.4215	24.3654	6.92031	9.86906	47.939	16.8807
824468	Eukaryotic translation initiation factor 3, subunit 4 (delta) (predicted) [Rattus norvegicus]	K.GIPLPTGDT*S*PEPELLPGDPLPPPK.E	T41S42*	2.77996	5.0773	55778376	Q9Z1D1		407029	GSK3_Kin (S42) 0.49% Erk1_Kin (S42) 0.61%	1.52141e+06	415217	5.12286e+06	1.10336e+06	282330	116177	3.66412	4.64295	2.43017	1347.66	1347.65	1347.64	1347.65	1347.63		57.6162	2	2	2	2	2		17.3142	10.5185	3.18081	9.16009	5.51915		4.4998	4.5794	4.2912	5.0773	4.1888		30.2653	30.5757	35.0033	57.6162	26.2004
826593	Eukaryotic translation initiation factor 3, subunit 4 (delta) (predicted) [Rattus norvegicus]	K.GIPLPTGDT*S*PEPELLPGDPLPPPK.E	T41S42*	0.341465	4.4485	55778376	Q9Z1D1		407029	GSK3_Kin (S42) 0.49% Erk1_Kin (S42) 0.61%	3.30508e+06	1.37585e+06	7.67724e+06	11794033	4.61901e+06	867416	2.4022	0.650943	5.32502	898.772	898.77	898.762	898.765			18.2705	3	3	3	3			11.1495	8.49944	0.341465	3.53712			4.4485	4.3819	3.5641	4.3731			15.6916	13.8036	11.2366	18.2705
822898	Eukaryotic translation initiation factor 3, subunit 9 (eta) [Rattus norvegicus]	R.AEEEGGS*DGSAAEAEPR.A	S114	0.683258	4.9906	71051705			395841		5.44843e+06	8.69292e+06	1.33047e+07	9.04327e+06	8.50301e+06	3.76837e+06	0.626766	1.47123	2.25641	871.335	871.338	871.336	871.333	871.338	871.339	48.3877	2	2	2	2	2	2	4.96077	7.90621	5.37991	2.79044	7.41244	8.74448	4.7146	4.9458	4.9906	4.6713	4.7142	4.7581	44.9354	39.9306	48.3877	39.3892	39.3892
823723	Eukaryotic translation initiation factor 3, subunit 9 (eta) [Rattus norvegicus]	R.AEEEGGS*DGSAAEAEPR.A	S114	9.26122	4.7082	71051705			395841		217466	714307	250730	462876	199475	414728	0.304444	0.541678	0.480977						581.229	4.31364						3						9.26122						4.7082
822904	Eukaryotic translation initiation factor 3, subunit 9 (eta) [Rattus norvegicus]	R.AEEEGGS*DGS*AAEAEPR.A	S114S117	0.977151	5.3084	71051705			395841		1.15301e+07	9.59063e+06	3.27063e+07	2.73646e+07	6.53281e+06	2.15743e+07	1.20222	1.1952	0.302806	911.321	911.319	911.315	911.318	911.318	911.322	100	2	2	2	2	2	2	7.88303	4.7979	0.977151	3.66156	4.59479	9.01936	4.798	4.9395	5.0449	4.9912	5.2384	5.3084	100	100	100	100	100
825711	Eukaryotic translation initiation factor 3, subunit 9 (eta) [Rattus norvegicus]	R.AEEEGGS*DGS*AAEAEPR.A	S114S117	2.94791	4.384	71051705			395841		288878	463232	703781	3.76883e+06	21786.6	17510	0.623614	0.186737	1.24423				607.881			100				3						3.34865						4.384						100
822996	Eukaryotic translation initiation factor 3, subunit 9 (eta) [Rattus norvegicus]	R.AEEEGGSDGS*AAEAEPR.A	S117	1.66508	5.7921	71051705			395841		8.79953e+06	6.99091e+06	7.71918e+06	1.07034e+07	1.03049e+07	1.53528e+07	1.25871	0.721186	0.671205	871.337	871.335	871.333	871.336	871.346	871.337	67.701	2	2	2	2	2	2	6.9933	4.82298	1.73398	5.59235	16.5931	6.57416	5.6832	5.7921	5.1503	5.745	5.6476	5.7773	61.229	61.229	51.9673	67.701	57.2546
823269	Eukaryotic translation initiation factor 3, subunit 9 (eta) [Rattus norvegicus]	R.ALENGEADEPSFS*DPEDFVDDVSEEELLGDVLK.D	S137	6.71346	6.6947	71051705			395841		382149	1.67485e+06	78143.6	522425	2.08085e+06	388345	0.228169	0.149579	5.35825		1230.54			1230.54		18.8106		3			3			11.0824			6.71346			3.8018			6.6947			15.8433			18.8106
824687	Eukaryotic translation initiation factor 3, subunit 9 (eta) [Rattus norvegicus]	R.QQPVSES*PPTDEAAGSGGSEVGR.T	S28	9.22477	3.7263	71051705			395841		2.7842e+06	461802	3.48237e+06	413289	423352	1.21161e+06	6.02899	8.42598	0.349414	1161.51					1161.51	22.4115	2					2	11.223					12.1705	3.7263					3.1846	22.4115
826636	Eukaryotic translation initiation factor 3, subunit 9 (eta) [Rattus norvegicus]	R.AKPAAQS*EEETAAS*PAAS*PTPQSAQEPSAPGK.A	S68S75S79	5.65528	6.7635	71051705			395841		1.67156e+06	647855	49314.1	228358	ND	243359	2.58014	0.21595	4.10916e-06	1111.14						16.991	3						5.65528						6.7635						16.991
823327	Eukaryotic translation initiation factor 3, subunit 9 (eta) [Rattus norvegicus]	R.AKPAAQSEEETAAS*PAASPTPQSAQEPSAPGK.A	S75	0.141891	7.52	71051705			395841		601485	4.07857e+06	84056.3	1.09995e+06	1.29121e+06	1.16187e+06	0.147475	0.0764186	1.11133	1057.82	1057.82		1057.82	1057.84	1057.82	57.5158	3	3		3	3	3	4.34188	2.10314		2.68016	18.0388	3.32341	3.89	7.1276		7.0046	5.8547	7.52	13.4057	57.5158		54.9564	51.5438
823021	Eukaryotic translation initiation factor 3, subunit 9 (eta) [Rattus norvegicus]	R.AKPAAQSEEETAAS*PAAS*PTPQSAQEPSAPGK.A	S75S79	0.0184535	8.2685	71051705			395841		3.05663e+07	1.58258e+07	7.13563e+07	2.00021e+07	1.59396e+07	7.04212e+06	1.93142	3.56743	2.26347	1084.48	1084.49	1084.48	1084.48	1084.49	1084.49	42.246	3	3	3	3	3	3	7.978	8.27325	3.35238	2.12215	13.271	10.6814	7.8106	7.7822	8.2685	8.1425	7.3744	6.6328	40.7884	38.4132	42.246	36.2729	38.7006
825553	Eukaryotic translation initiation factor 3, subunit 9 (eta) [Rattus norvegicus]	K.PAAQSEEETAAS*PAAS*PTPQSAQEPSAPGK.A	S75S79	0.46195	4.8707	71051705			395841		4.35105e+06	5.71478e+06	5.70641e+06	3.93572e+06	25573.1	52301.8	0.761368	1.4499	0.488952	1018.11	1018.1	1018.1	1018.1			20.7059	3	3	3	3			10.1497	5.53681	0.46195	5.29765			4.4588	4.5584	4.4632	4.8707			17.6892	20.7059	17.946	18.3538
827901	Eukaryotic translation initiation factor 3, subunit 9 (eta) [Rattus norvegicus]	K.PAAQSEEETAAS*PAAS*PTPQSAQEPSAPGK.A	S75S79	6.8735	3.8502	71051705			395841		ND	19918.8	1.43326e+06	945223	12991.3	4827.33	5.02039e-05	1.51632	2.6912			1526.66				24.1063			2						6.8735						3.8502						24.1063
825668	Eukaryotic translation initiation factor 3, subunit 9 (eta) [Rattus norvegicus]	K.PAAQSEEETAAS*PAASPT*PQSAQEPSAPGK.A	S75T81	6.85712	5.6172	71051705			395841		6.74507e+06	5.73797e+06	1.2823e+06	3.94137e+06	31707.9	2.50141e+06	1.17551	0.325344	0.012676	1018.11	1018.11		1018.11			18.9816	3	3		3			7.15853	8.0562		6.85712			4.0304	5.6172		3.9093			18.9816	18.5459		12.7061
826610	Eukaryotic translation initiation factor 3, subunit 9 (eta) [Rattus norvegicus]	R.AKPAAQSEEET*AAS*PAAS*PTPQSAQEPSAPGK.A	T72S75S79	1.07163	6.9255	71051705			395841		1.63748e+06	660110	4.92799e+06	1175729	155376	846725	2.48062	4.19144	0.183502	1111.14	1111.14	1111.13				22.6518	3	3	3				10.5991	10.377	1.07163				6.9255	5.8877	6.6243				19.8099	13.3708	22.6518
824647	Eukaryotic translation initiation factor 3, subunit J [Rattus norvegicus]	K.LQEES*DLELAK.E	S128	2.46564	3.917	117558290	O75822	4883	404511		4.70965e+06	2.02366e+06	2.5992e+06	2.17063e+06	680637	1.4938e+06	2.32729	1.19744	0.455641	677.815		677.812			677.817	100	2		2			2	7.33045		2.46564			9.22764	3.7242		3.5571			3.917	100		100
827886	Eukaryotic translation initiation factor 4B (predicted) [Rattus norvegicus] [MASS=69064]	R.S*QSS*DTEQPSPTSGGGK.V	S495S498*	1.79039	5.326	55715687	Q8BGD9		400883		1.19644e+06	1.83686e+06	9.90153e+06	2.68241e+06	928521	1.01039e+06	0.651349	3.69129	0.918975			905.334				21.0215			2						1.79039						5.326						21.0215
825193	Eukaryotic translation initiation factor 4B (predicted) [Rattus norvegicus] [MASS=69064]	R.SQS*SDTEQPSPTSGGGK.V	S497*	0.156097	5.9093	55715687	Q8BGD9		400883		517909	17792318	1.06819e+07	4.56185e+07	1.16801e+06	7.56569e+06	0.0291086	0.234157	0.154383	865.352	865.354	865.351	865.352			30.193	2	2	2	2			2.80396	5.13384	2.31255	3.65382			4.1422	5.3183	5.139	5.9093			18.1068	21.214	12.0862	30.193
825137	Eukaryotic translation initiation factor 4B (predicted) [Rattus norvegicus] [MASS=69064]	R.SQS*S*DTEQPSPTSGGGK.V	S497S498*	1.65777	4.6563	55715687	Q8BGD9		400883		1.19644e+06	1.83686e+06	9.90153e+06	2.68241e+06	928521	467526	0.651349	3.69129	1.98603			905.337	905.335			35.3754			2	2					4.69147	2.93977					4.6563	4.646					34.3402	35.3754
823935	Eukaryotic translation initiation factor 4B (predicted) [Rattus norvegicus] [MASS=69064]	R.SQSS*DTEQPSPTSGGGK.V	S498*	2.31255	5.6778	55715687	Q8BGD9		400883		493780	1.95776e+07	1.28872e+07	2.7338e+07	1.36344e+06	250040	0.0252217	0.471403	5.4529	865.355		865.352	865.353		865.363	33.8039	2		2	2		2	7.04167		2.87334	3.86195		15.5112	4.7195		5.6778	5.4461		5.4649	16.8124		23.8995	25.5751
824532	Eukaryotic translation initiation factor 4B (predicted) [Rattus norvegicus] [MASS=69064]	R.SQSS*DTEQPSPTSGGGK.V	S498*	0.786267	3.9852	55715687	Q8BGD9		400883		3.21811e+06	21490.5	2.32351e+06	4.56262e+06	1.96759e+06	87934.6	149.746	0.50925	22.3756		577.239	577.239	577.238		577.244	6.6281		3	3	3		3		6.39416	5.65416	4.2782		14.6556		3.354	3.8178	3.9852		3.142		6.07455	6.6281
823982	Eukaryotic translation initiation factor 4B (predicted) [Rattus norvegicus] [MASS=69064]	R.SQSS*DTEQPS*PTSGGGK.V	S498S504*	1.72408	4.6004	55715687	Q8BGD9		400883		1.19644e+06	1.26481e+06	6.11095e+06	1.64379e+06	315846	259332	0.94594	3.71759	1.21792			905.334	905.34		905.345	32.7894			2	2		2			1.99485	8.13407		14.1351			4.4487	4.6004		3.7373			32.7894	24.7373
825101	Eukaryotic translation initiation factor 4B (predicted) [Rattus norvegicus] [MASS=69064]	R.SQSSDTEQPS*PTSGGGK.V	S504*	1.89051	4.9082	55715687	Q8BGD9		400883		1.46008e+07	1.77869e+07	1.74361e+07	4.56266e+07	240727	4.10834e+06	0.82087	0.382148	0.0585947	865.352	865.354	865.353	865.354			51.1501	2	2	2	2			3.65382	5.06446	4.14523	5.20321			4.0683	4.5386	4.8463	4.9082			32.1312	51.1501	26.0224	36.4844
827812	Eukaryotic translation initiation factor 4B (predicted) [Rattus norvegicus] [MASS=69064]	K.YAALS*VDGEDEDEGDDCTE.-	S597	3.4382	4.184	55715687	Q8BGD9		400883		118755	30289.4	1.61472e+06	57089.7	42452	43792.2	3.92066	28.2839	0.969398			1085.38				17.2496			2						5.01442						4.184						17.2496
822509	eukaryotic translation initiation factor 4E binding protein 1 [Rattus norvegicus]	K.FLMECRNS*PVAK.T	S64	1.09031	3.8843	16758724	Q60876		402112		1.49177e+06	1.65429e+06	339417	130348	4.32817e+06	1.17114e+06	0.901759	2.60392	3.69569	766.349	766.352	766.346	766.346	766.35	766.354	100	2	2	2	2	2	2	6.7246	11.5819	3.36884	3.53206	8.78766	13.3316	3.3174	3.7943	3.3435	3.3844	3.8843	3.2917	100	100	100	100	100
828076	Eukaryotic translation initiation factor 4E binding protein 2 [Rattus norvegicus]	R.TVAISDAAQLPQDYCTT*PGGTLFS*TTPGGTR.I	T37S44	5.37165	6.4754	71682965	P70445		395435		2.61472e+07	2.60854e+07	2.34558e+07	1.56816e+07	4.64017e+07	1.50923e+06	1.00237	1.49576	30.7453				1115.16			5.83351				3						5.37165						6.4754						5.83351
822012	Eukaryotic translation initiation factor 4E binding protein 2 [Rattus norvegicus]	R.TVAISDAAQLPQDYCTT*PGGTLFSTT*PGGTR.I	T37T46	0.442655	6.1869	71682965	P70445		395435		2.64032e+07	2.64742e+07	2.34437e+07	1.84231e+07	4.62841e+07	3.46814e+07	0.997319	1.27251	1.33455	1115.18	1115.17	1115.16	1115.16	1115.16	1115.17	29.217	3	3	3	3	3	3	15.7768	13.0402	5.15332	2.96399	3.83733	11.8349	5.8547	5.1006	5.2106	6.1869	6.0977	4.9639	29.217	9.66042	14.2091	17.6454	23.2398
824234	excision repair cross-complementing rodent repair deficiency, complementation group 5 (mapped) [Rattus norvegicus] [MASS=96100]	R.SAWATADAGSIS*PQTCAAIQR.A	S384	18.4386	5.0894	149046241					518615	1.04591e+06	2.48982e+06	4.17136e+06	1.20948e+06	1.19596e+06	0.49585	0.596885	1.0113					1121.52		12.1748					2						18.4386						5.0894						12.1748
823597	excision repair cross-complementing rodent repair deficiency, complementation group 5 (mapped) [Rattus norvegicus] [MASS=96100]	K.DAEEPKETLEEGS*PR.N	S691	6.46381	3.9999	149046241					3.16802e+06	3.32707e+06	3.5072e+06	1.24911e+06	734841	1.20705e+06	0.952195	2.80777	0.60879		883.883				883.89	80.3839		2				2		6.46381				13.5784		2.5868				3.9999		80.3839
824678	Exosc5 protein [Rattus norvegicus] [MASS=24958]	K.VLTDTGTESS*PR.S	S18	1.944	4.2722	187469539			407052		5.09501e+06	1.04101e+06	562450	828109	1.05345e+06	2.76311e+06	4.89429	0.679199	0.381257		671.8	671.8			671.806	30.193		2	2			2		3.40386	2.49517			12.5875		2.6361	3.9495			4.2722		22.4677	30.193
823836	Exosc5 protein [Rattus norvegicus] [MASS=24958]	K.VLTDTGTESSPRS*PVCSLR.H	S21	1.47059	3.5298	187469539			407052		258165	1.50698e+07	9.44239e+06	5.19656e+06	4.42882e+06	4.33003e+06	0.0171312	1.81705	1.02282		714.675	714.67	714.67	714.682	714.674	21.5638		3	3	3	3	3		9.85056	3.35201	2.75444	19.7663	8.73946		3.4239	3.4412	3.5298	3.3428	2.8519		8.36742	21.5638	10.2773	4.33905
827051	Exosc5 protein [Rattus norvegicus] [MASS=24958]	K.VLTDTGTESSPRS*PVCSLR.H	S21	1.87676	3.6391	187469539			407052		255650	5.05734e+06	3.20211e+06	1.05703e+06	2.08973e+06	441747	0.0505503	3.02934	4.73061		1071.52	1071.5				29.7221		2	2					15.5554	1.87676					3.6391	3.1101					29.7221	29.7221
825286	Fam65a protein [Rattus norvegicus] [MASS=97269]	R.FSTYSQS*PPDTPSLR.E	S45*	2.20675	4.2267	71051815	-	8586	405085	GSK3_Kin (S76) 0.25% Erk1_Kin (S76) 0.5%	1.62756e+06	2.32096e+06	1.23367e+06	2.19982e+06	398776	395632	0.701244	0.560805	1.00795	881.898	881.894	881.893				40.192	2	2	2				11.0734	7.335	5.46297				3.9858	4.2267	3.8678				26.0224	40.192	33.224
826845	Fam65a protein [Rattus norvegicus] [MASS=97269]	K.SPSS*SPSSIVPEPQR.S	S450	6.01926	3.2871	71051815			405085		2.45602e+06	199128	1498464	25597.8	118421	22043	12.3339	58.5387	5.37226	817.884						25.5751	2						11.5246						3.2871						25.5751
823454	FANG1 [Rattus norvegicus]	R.SGT*FDLLEMDR.L	T406	16.8453	4.3965	15277839	Q9NVE7	7313	410707	Akt_Kin (T406) 0.02% Cam_Kin2 (T406) 0.45%	ND	7647.32	ND	ND	7873.93	593792	0.000130765	1	0.0132604						682.295	-0.315171						2						16.8453						4.3965
822803	Far upstream element (FUSE) binding protein 1 [Rattus norvegicus] [MASS=67197]	R.QQAAYYAQTS*PQGMPQHPPAPQGQ.-	S625	0.920652	4.4377	79160170	Q96AE4	10349			141693	2.06693e+06	3.05652e+06	1.90854e+06	2.4191e+06	3.4867e+06	0.0685527	1.60149	0.693809			887.728	887.728	887.728	887.724	27.6809			3	3	3	3			5.59904	4.83998	5.46001	0.920652			3.5939	4.4377	4.0184	4.3474			12.3145	16.118	27.6809
822804	Far upstream element (FUSE) binding protein 1 [Rattus norvegicus] [MASS=67197]	R.QQAAYYAQTS*PQGMPQHPPAPQGQ.-	S625	5.18945	4.0195	79160170	Q96AE4	10349			ND	2.69945e+06	1.47119e+06	174890	785264	1.42584e+06	3.70445e-07	8.4121	0.550739			1331.09		1331.09	1331.09	22.4677			2		2	2			10.3262		5.18945	6.56853			3.5642		4.0195	3.6528			22.4677		13.8917
821861	Far upstream element (FUSE) binding protein 1 [Rattus norvegicus] [MASS=67197]	R.QQAAYYAQT*SPQGMPQHPPAPQGQ.-	T624	3.73896	3.908	79160170	Q96AE4	10349			ND	1.95039e+06	2.31087e+06	375894	2.42072e+06	3.40737e+06	5.12718e-07	6.14765	0.710436					887.731		5.92917					3						8.624						3.908						5.92917
827024	farnesyltransferase, CAAX box, alpha; Farnesyltransferase, subunit alpha [Rattus norvegicus]	R.ESDIPAS*V.-	S376	6.17363	2.0011	6978849	Q61239		403247		2.78999e+06	4.19975e+07	8.26998e+06	5.6737e+06	7.71747e+06	416893	0.0664323	1.4576	18.5119	897.366						42.934	1						6.17363						2.0011						42.934
824502	Fas death domain associated protein [Rattus norvegicus]	R.DSTVSFSET*P.-	T207	13.8675	1.9704	20145614			407185		18110.6	35520.3	3887.05	3437.18	ND	488351	0.509867	1.13089	2.04771e-06						1149.45	17.6965						1						13.8675						1.9704
824703	fas-associated factor 1 [Rattus norvegicus]	R.TPS*GEFLER.R	S581	5.9974	3.0636	15284036	Q9UNN5	5124	399912		2.06461e+06	911135	358282	245072	68791	407870	2.26598	1.46195	0.168659						558.245	45.1572						2						5.9974						3.0636
822109	fatty acid synthase (AA 1 - 2431) [Rattus norvegicus]	K.AGS*DTELAAPK.S	S2117	0.0351032	4.3616	56133	P12785				1.42026e+08	3.18084e+08	4.98458e+07	5.445e+07	4.67851e+07	1.08682e+08	0.446506	0.91544	0.430476	570.254	570.253	570.254	570.253	570.254	570.258	55.2084	2	2	2	2	2	2	1.68495	0.50022	3.17683	0.0702063	1.68495	10.1447	4.0693	4.2836	4.3442	4.3616	4.2673	4.2463	55.2084	51.1501	51.1501	55.2084	51.1501
822110	fatty acid synthase (AA 1 - 2431) [Rattus norvegicus]	K.AGS*DTELAAPK.S	S2117	1.74638	2.574	56133	P12785				1.4571e+07	3.4146e+07	7.44988e+06	5.719e+06	1.99881e+07	3.05398e+07	0.426728	1.30265	0.654494	1139.51	1139.51	1139.5	1139.5	1139.51	1139.51	45.2895	1	1	1	1	1	1	7.31896	8.06489	3.02764	1.74638	7.52957	10.3202	2.4446	2.574	2.4064	2.4352	2.4542	2.3958	45.2895	38.3626	41.4063	41.4063	33.7015
824709	F-box and WD-40 domain protein 9 [Rattus norvegicus]	R.SCEDES*DPEPEPDPDAQAEAYVAR.V	S18	1.64306	4.9842	126012523			397374		2.08438e+06	1.60984e+06	2.1343e+06	5.2773e+06	535221	1.69499e+06	1.29477	0.404431	0.315766		919.694	919.69	919.691		919.693	38.2077		3	3	3		3		6.15872	1.90783	2.57158		5.2302		4.9842	4.2356	4.4795		4.3625		38.2077	18.6743	21.0621
826934	F-box and WD-40 domain protein 9 [Rattus norvegicus]	R.SCEDES*DPEPEPDPDAQAEAYVAR.V	S18	2.69853	4.6469	126012523			397374		1.53618e+06	1.11407e+06	2.40642e+06	7193874	1.10884e+06	1.37016e+06	1.37889	0.334509	0.809274	1379.05		1379.04	1379.03			33.7162	2		2	2			18.3381		5.76337	3.28611			3.5465		4.4676	4.6469			20.8518		33.7162	33.7162
823538	F-box only protein 30 [Rattus norvegicus]	K.DVNGS*PLSHATSFK.F	S379	2.83824	4.1517	53734553	Q5XI67		403375	Cdc2_Kin (S379) 0.87%	244437	2.79116e+06	4.2654e+06	5.29163e+06	5.19691e+06	5.92118e+06	0.0875752	0.806064	0.877682	770.353	770.351	770.348	770.348	770.356	770.355	46.4953	2	2	2	2	2	2	9.5798	7.20273	3.6306	2.83824	13.6974	11.6386	4.0046	4.1517	3.6275	3.6905	3.5798	3.4273	18.4321	40.0233	15.617	29.6036	28.396
823147	F-box only protein 30 [Rattus norvegicus]	K.DVNGSPLS*HATSFK.F	S382	2.04587	3.092	53734553	Q5XI67		403375		94027.8	2.80177e+06	4.25074e+06	5.33374e+06	5.19967e+06	26672.1	0.0335602	0.796952	194.948				770.347	770.349		-7.97037				2	2					2.04587	5.05945					3.092	2.8715
823113	F-box only protein 4 (predicted) [Rattus norvegicus] [MASS=48572]	R.GAGS*PPPASDWGR.L	S57*	0.202315	3.462	149016524	Q8CHQ0		403829	Erk1_Kin (S11) 0.28%	7.44674e+07	6.66793e+07	6.71632e+07	7.10921e+07	37194276	3.77414e+07	1.1168	0.944735	0.985504	667.783	667.784	667.781	667.782	667.791	667.79	62.2603	2	2	2	2	2	2	4.50336	5.59735	2.12805	2.67505	16.3048	14.9336	3.3305	3.462	3.4403	3.3153	3.1294	3.3716	55.7884	62.2603	60.4958	57.8451	62.2603
823117	F-box only protein 4 (predicted) [Rattus norvegicus] [MASS=48572]	R.GAGS*PPPASDWGR.L	S57*	0.929151	2.1958	149016524	Q8CHQ0		403829	Erk1_Kin (S11) 0.28%	697728	593704	3.73446e+06	5.26183e+06	2.79026e+06	434886	1.17521	0.709726	6.41609				1334.56	1334.57		63.5938				1	1					4.55581	16.08					2.1958	1.7634					38.8208	63.5938
823271	F-box protein FBG2 [Rattus norvegicus]	K.ILSFGSWEDLS*P.-	S283	3.38313	2.7572	14595688	Q923V4		400140		1.10474e+06	732006	1.4571e+06	203256	2.54325e+06	233535	1.50919	7.16881	10.8902	1430.65		1430.63		1430.63		44.7993	1		1		1		19.5995		3.38313		6.54256		2.602		2.5387		2.7572		44.7993		36.7575		23.9769
824251	F-box protein FBG2 [Rattus norvegicus]	K.ILSFGSWEDLS*P.-	S283	2.30668	3.2297	14595688	Q923V4		400140		5.99391e+06	1.46834e+06	5.90749e+06	3.47878e+06	7.60042e+06	1.26496e+07	4.08209	1.69815	0.600841				715.817	715.82	715.822	118.946				2	2	2				2.30668	6.49363	8.36691				2.5002	2.7068	3.2297				51.6008	91.4198
823616	FCH domain only 2 (predicted) [Rattus norvegicus] [MASS=71018]	R.AES*SSSISSSASLSAANTPTVGVSR.G	S358	1.06859	4.5259	149059149	Q0JRZ9	13319	403716		614842	2.7053e+06	8.38094e+06	9.02595e+06	2.99923e+06	4.02066e+06	0.227273	0.928539	0.745954			811.712		811.718	811.717	10.7918			3		3	3			3.52222		10.5995	9.09115			4.5259		4.437	4.3684			7.03769		10.7918
826702	FCH domain only 2 (predicted) [Rattus norvegicus] [MASS=71018]	R.AES*SSS*ISSSASLSAANTPTVGVSR.G	S358S361	3.4181	4.743	149059149	Q0JRZ9	13319	403716		21563.5	338972	1.6803e+06	2.77349e+06	7665.4	127698	0.0636142	0.605844	0.0600277		1257.06		1257.05			10.6169		2		2				13.6802		3.4181				4.743		3.7714				10.6169		9.94276
826762	FCH domain only 2 (predicted) [Rattus norvegicus] [MASS=71018]	R.AESS*S*SISSSASLSAANTPTVGVSR.G	S359S360	0.274563	5.3844	149059149	Q0JRZ9	13319	403716		21563.5	338972	1.67208e+06	2.7826e+06	10032.6	127698	0.0636142	0.600905	0.0785655		1257.05	1257.06	1257.05			3.95419		2	2	2				7.65986	9.69717	5.71407				4.2447	5.3844	4.9985				3.95419
826737	FCH domain only 2 (predicted) [Rattus norvegicus] [MASS=71018]	R.AESS*SS*ISSSASLSAANTPTVGVSR.G	S359S361	1.83042	4.8974	149059149	Q0JRZ9	13319	403716		21563.5	338972	1.67208e+06	2.7826e+06	7665.4	127698	0.0636142	0.600905	0.0600277		1257.05	1257.05	1257.05			6.78825		2	2	2				4.06273	6.00853	1.83042				4.8974	4.7175	4.6384				6.78825	6.76308	4.75426
822825	FCH domain only 2 (predicted) [Rattus norvegicus] [MASS=71018]	R.AESSS*SISSSASLSAANTPTVGVSR.G	S360	3.10301	6.7745	149059149	Q0JRZ9	13319	403716		1.47992e+06	1.47678e+06	5.94639e+06	8.1279e+06	3.01678e+06	3.75653e+06	1.00213	0.731603	0.803077	1217.05	1217.07	1217.06	1217.07	1217.07	1217.08	7.59668	2	2	2	2	2	2	10.4435	7.61981	3.10301	7.91983	7.1184	15.3422	3.7534	6.6023	6.409	6.7745	5.8929	5.8955			7.59668		6.53213
827971	FCH domain only 2 (predicted) [Rattus norvegicus] [MASS=71018]	R.AESSS*S*ISSSASLSAANTPTVGVSR.G	S360S361	1.42852	4.2494	149059149	Q0JRZ9	13319	403716		10975.7	338972	1.67208e+06	2.1378e+06	7665.4	127698	0.0323793	0.782148	0.0600277				1257.05			4.54845				2						1.42852						4.2494						4.54845
824314	FCH domain only 2 (predicted) [Rattus norvegicus] [MASS=71018]	R.AESSSS*ISSSASLSAANTPTVGVSR.G	S361	2.3961	5.0168	149059149	Q0JRZ9	13319	403716		614842	2.3601e+06	8.37344e+06	9.02595e+06	2.99923e+06	4.02066e+06	0.260516	0.927707	0.745954			811.711		811.719		-0.457575			3		3				2.3961		11.1995				4.3531		5.0168
826897	FERM, RhoGEF (Arhgef) and pleckstrin domain protein 1 (chondrocyte-derived) (predicted) [Rattus norvegicus] [MASS=118841]	K.SPDEATAADQES*EDDLSASR.T	S893	11.4037	4.0188	149050235	-	16006	401405	Casn_Kin2 (S889) 0.1%	529139	321105	15293.5	50293.7	587374	53014.1	1.64787	0.304083	11.0796	1087.44						55.5226	2						11.4037						4.0188						55.5226
826447	Fermt3 protein [Rattus norvegicus] [MASS=75622]	K.TAS*GDYIDSSWELR.V	S8	3.26844	4.9679	183985890	Q86UX7	7440	407401		323603	745374	402383	755064	349222	25060.3	0.434149	0.532912	13.9353		840.359	840.356	840.355			13.8039		2	2	2				9.5195	5.74506	5.16163				4.9679	4.824	4.7576				10.6145	11.9539	13.8039
826813	ferredoxin 1-like [Rattus norvegicus]	R.AGEDEADS*PELPR.D	S51	3.50712	4.5658	157819373			407107		4.3562e+06	1.3872e+06	251437	228599	479894	441073	3.14027	1.0999	1.08801	733.3						100	2						5.92252						4.5658						100
824124	fetuin precursor [Rattus norvegicus]	R.VLHAQCHS*TPDSAEDVRK.F	S134*	0.286393	3.8687	56140	P24090		396139		2.22603e+07	229296	302376	1.04581e+07	103837	126682	97.0811	0.028913	0.819672	1065.48	1065.49	1065.47	1065.48	1065.49		24.2815	2	2	2	2	2		1.22538	11.587	0.338037	0.286393	15.7091		3.8687	3.3604	3.2122	2.7757	3.6947		8.93947	10.7918	10.7918	12.833	24.2815
822374	fetuin precursor [Rattus norvegicus]	R.VLHAQCHSTPDS*AEDVRK.F	S138*	0	5.588	56140	P24090		396139		1.20758e+08	2.01659e+08	8.78883e+07	5.80594e+07	3.88937e+08	899381	0.598823	1.51376	432.449	710.654	710.654	710.653	710.653	710.658	710.658	83.8657	3	3	3	3	3	3	1.54933	1.69488	0.347427	0.755888	7.13629	6.96727	5.1807	5.588	5.5435	5.3552	5.5218	4.9128	76.1537	83.8657	71.6986	67.4031	61.5682
822386	fetuin precursor [Rattus norvegicus]	R.VLHAQCHSTPDS*AEDVR.K	S138*	0.06494	4.666	56140	P24090		396139		1.27306e+08	1.95695e+08	6.48449e+07	9.43894e+07	5.06271e+08	3.03826e+08	0.650535	0.686994	1.66632	667.955	667.954	667.954	667.955	667.956	667.961	91.6636	3	3	3	3	3	3	1.28381	0.339686	0.119889	0.284737	3.04717	10.73	4.666	4.32	4.4353	4.6027	4.2267	4.3162	84.1237	83.4708	91.6636	91.6636	75.3542
822387	fetuin precursor [Rattus norvegicus]	R.VLHAQCHSTPDS*AEDVR.K	S138*	0.124885	5.535	56140	P24090		396139		2.58006e+07	2.48151e+07	1.30148e+07	7414448	7.64315e+07	4.77022e+07	1.03971	1.75533	1.60226	1001.43	1001.43	1001.43	1001.43	1001.44	1001.44	71.7192	2	2	2	2	2	2	4.27103	4.27103	2.21296	1.70842	14.5164	7.50301	4.7837	4.728	4.9229	5.1445	5.535	4.7548	55.8469	46.8588	55.2084	71.7192	46.8588
822596	fetuin precursor [Rattus norvegicus]	R.VLHAQCHSTPDS*AEDVRK.F	S138*	0.464801	4.1746	56140	P24090		396139		2.22517e+07	4.57862e+07	3.8176e+07	1.04581e+07	9.59055e+07	126682	0.485991	3.65037	757.059	1065.47	1065.48	1065.47	1065.48	1065.48		34.6839	2	2	2	2	2		0.6526	5.45082	0.6526	1.84042	8.26306		3.7768	4.1746	3.7984	3.5093	3.4073		33.1543	34.6839	27.6965	34.6839	34.6839
827427	fetuin precursor [Rattus norvegicus]	R.HAFS*PVASVESAS*GEVLHSPK.V	S309S318	6.24124	2.885	56140	P24090		396139		1.3281e+06	1.61754e+06	5.33508e+06	1.80894e+06	4.53974e+06	9.46385e+06	0.821062	2.94929	0.479693		766.011					13.1326		3						6.24124						2.885						13.1326
822326	fetuin precursor [Rattus norvegicus]	R.HAFSPVAS*VESASGEVLHSPK.V	S313	0.148914	4.7502	56140	P24090		396139		687689	985312	1.78425e+06	15908.2	2.09738e+07	3.74489e+06	0.697941	112.159	5.60065	739.354	739.358	739.351		739.355		60.4582	3	3	3		3		4.77426	9.32286	0.148914		5.27064		4.2278	4.4331	4.7502		4.2805		32.7548	26.7084	28.3679		60.4582
827383	fetuin precursor [Rattus norvegicus]	R.HAFSPVAS*VESASGEVLHSPK.V	S313	10.1532	4.6609	56140	P24090		396139		47674	ND	7705.7	7559.65	311801	5992.3	47674	1.01932	52.0336	1108.53						10.7068	2						10.1532						4.6609						10.7068
822345	fetuin precursor [Rattus norvegicus]	R.HAFSPVAS*VES*ASGEVLHSPK.V	S313S316	0.797036	5.2354	56140	P24090		396139		3.75194e+06	1.0312e+07	3.93425e+07	1.14169e+07	3.42444e+07	4.89054e+06	0.36384	3.44599	7.00217	766.012	766.013	766.01	766.003	766.013	766.016	35.8064	3	3	3	3	3	3	6.93809	7.97466	4.06356	4.64722	9.09398	12.6	4.6982	4.2915	5.2354	4.7732	3.1725	3.8705	28.0538	33.8651	31.9015	35.8064	28.1477
822562	fetuin precursor [Rattus norvegicus]	R.HAFSPVAS*VES*ASGEVLHSPK.V	S313S316	1.59843	6.0917	56140	P24090		396139		217139	405997	3.77533e+06	6000.1	2.42101e+06	380931	0.534829	629.212	6.35551	1148.5	1148.52	1148.51		1148.52	1148.5	44.844	2	2	2		2	2	1.59843	12.7742	2.45208		15.5311	4.56447	5.2159	6.0917	5.6196		5.2882	4.6867	16.4645	24.6661	44.844		16.408
822464	fetuin precursor [Rattus norvegicus]	R.HAFSPVAS*VES*AS*GEVLHSPK.V	S313S316S318	0.0589233	5.835	56140	P24090		396139		3.13227e+07	6.36184e+07	1.05521e+08	1.36672e+08	1.49514e+08	1.45084e+08	0.492353	0.772075	1.03054	792.671	792.67	792.664	792.664	792.675	792.665	55.0678	3	3	3	3	3	3	11.3636	9.68016	3.33336	2.94616	16.1994	3.71636	5.1564	5.2792	5.6262	5.835	5.3698	4.677	47.1474	36.4228	49.7204	55.0678	48.2705
822556	fetuin precursor [Rattus norvegicus]	R.HAFSPVAS*VES*AS*GEVLHSPK.V	S313S316S318	0.408254	6.0694	56140	P24090		396139		5.78824e+06	9.68584e+06	1.41174e+07	3.60585e+07	3.66613e+07	3.07629e+07	0.597598	0.391514	1.19174	1188.5	1188.5	1188.49	1188.49	1188.51	1188.49	73.1503	2	2	2	2	2	2	13.0471	8.41754	0.614485	1.4352	14.1793	3.69532	6.0099	5.9435	6.0694	5.6702	5.9713	3.605	61.503	71.6212	59.8828	73.1503	61.3447
824112	fetuin precursor [Rattus norvegicus]	R.HAFSPVAS*VES*ASGEVLHS*PK.V	S313S316S324	1.68352	5.3687	56140	P24090		396139	p38_Kin (S324) 0.54%	1.89166e+07	2.72044e+07	1.05518e+08	1.36656e+08	3.89094e+07	232592	0.695352	0.77214	167.286	792.667	792.669	792.663		792.672		23.97	3	3	3		3		6.73404	8.83841	1.68352		12.4242		4.0286	3.8492	5.3687		4.965		17.9054	12.7226	10.3967		23.97
824898	fetuin precursor [Rattus norvegicus]	R.HAFSPVAS*VESAS*GEVLHSPK.V	S313S318	0	5.1869	56140	P24090		396139		4.45147e+06	6.14473e+06	9.66916e+06	4.71744e+06	105074	3.35316e+06	0.724437	2.04966	0.0313357	766.009	766.013	766.008	766.009			37.8383	3	3	3	3			2.75696	8.05741	1.88588	3.67158			4.5607	5.0554	5.1869	4.9341			33.5472	37.8383	37.4253	31.1808
824970	fetuin precursor [Rattus norvegicus]	R.HAFSPVAS*VESAS*GEVLHSPK.V	S313S318	1.16289	6.3917	56140	P24090		396139		381848	686417	3.91977e+06	3.5848e+06	101543	6.45473e+06	0.556291	1.09344	0.0157315	1148.52	1148.5	1148.51				21.7913	2	2	2				12.3387	1.16289	3.09232				6.2757	6.3917	5.3749				20.5751	17.0405	21.7913
825484	fetuin precursor [Rattus norvegicus]	R.HAFSPVAS*VESAS*GEVLHS*PK.V	S313S318S324	1.71298	4.3625	56140	P24090		396139	p38_Kin (S324) 0.54%	803935	6.3599e+07	1.05581e+08	1.02077e+07	557547	230712	0.0126407	10.3432	2.41664		792.666	792.663				12.5112		3	3					5.05054	1.71298					4.3625	4.3598					12.5112	11.1243
822451	fetuin precursor [Rattus norvegicus]	R.HAFSPVASVES*ASGEVLHSPK.V	S316	1.09204	5.1914	56140	P24090		396139		5.64661e+07	4.47682e+07	1.30172e+06	1.91172e+07	1.7191e+08	2.32071e+06	1.2613	0.0680918	74.0762			739.352		739.354		37.8097			3		3				1.2229		4.52607				5.0391		5.1914				37.8097		26.74
822322	fetuin precursor [Rattus norvegicus]	R.HAFSPVASVES*AS*GEVLHSPK.V	S316S318	0	6.2081	56140	P24090		396139		2.61753e+07	5.98814e+07	1.48788e+08	2.71107e+07	6.7328e+08	2.01447e+08	0.437119	5.48816	3.34221	766.012	766.009	766.008	766.008	766.011	766.009	64.7246	3	3	3	3	3	3	7.54784	3.03134	1.88588	1.59407	6.14106	2.87019	4.8469	5.4981	5.6045	6.2081	5.5932	6.1339	36.6256	45.6264	62.15	45.0463	35.6058
822324	fetuin precursor [Rattus norvegicus]	R.HAFSPVASVES*AS*GEVLHSPK.V	S316S318	0.431184	7.4837	56140	P24090		396139		1.28556e+06	4.05674e+06	1.6925e+07	3.5848e+06	1.48909e+08	1.525e+07	0.316895	4.72133	9.76453	1148.52	1148.51	1148.51	1148.51	1148.52	1148.53	65.7507	2	2	2	2	2	2	12.9789	5.37017	2.45208	3.19249	9.46853	17.4474	6.8384	7.3993	7.0047	6.1008	7.4837	6.9569	54.2136	61.954	65.7507	53.1128	45.962
824123	fetuin precursor [Rattus norvegicus]	R.HAFSPVASVES*ASGEVLHS*PK.V	S316S324	3.62803	4.4341	56140	P24090		396139	p38_Kin (S324) 0.54%	1.46905e+06	1.03597e+07	3.94544e+07	554972	133932	4.9599e+06	0.141804	71.0927	0.027003	766.009				766.017		6.9897	3				3		3.62803				13.3186		4.0159				4.4341		5.25494				6.9897
822305	fetuin precursor [Rattus norvegicus]	R.HAFSPVASVESAS*GEVLHSPK.V	S318	0.925075	6.7772	56140	P24090		396139		4.42141e+07	5.25524e+07	5.06165e+07	2.2051e+07	1.7161e+08	7.93969e+07	0.841332	2.29542	2.16142	739.358	739.354	739.353	739.354	739.359	739.358	38.1697	3	3	3	3	3	3	10.0629	4.35911	2.5541	3.90786	10.2299	9.98168	5.8972	6.2787	6.5051	6.7772	5.8741	5.1496	33.9769	31.741	33.9769	35.553	38.1697
822532	fetuin precursor [Rattus norvegicus]	R.HAFSPVASVESAS*GEVLHSPK.V	S318	0.0947637	7.3338	56140	P24090		396139		2.61356e+06	2.12543e+06	3.19812e+06	987525	2.87372e+06	2.49001e+06	1.22966	3.23852	1.1541	1108.54	1108.54	1108.52	1108.52	1108.54	1108.54	16.118	2	2	2	2	2	2	15.55	11.5791	1.5072	1.20034	15.9922	17.9732	7.2705	6.4043	7.3338	6.4589	7.1725	6.3748	12.3145	10.8814	13.9358	16.118	6.76694
822375	fetuin precursor [Rattus norvegicus]	R.VLHAQCHST*PDSAEDVRK.F	T135*	0.450716	3.8963	56140	P24090		396139		22211506	4.538e+07	3.8176e+07	1.04581e+07	4.58735e+07	126682	0.489456	3.65037	362.116	1065.47	1065.48	1065.47	1065.47	1065.47		25.5751	2	2	2	2	2		1.1221	3.57285	0.450716	0.450716	0.793449		3.6102	3.8963	3.0589	3.5086	3.1073		20.096	15.6526	25.5751	7.59668	12.0862
822780	fetuin-like protein IRL685 [Mus musculus]	R.S*PPAPPLPQR.P	S20	2.50097	2.9448	6562691	Q9QXC1				2.65726e+08	2.04346e+08	4.24837e+07	2.40476e+07	2.52187e+07	503075	1.30037	1.76665	50.1291	570.274	570.274	570.273	570.273	570.277	570.283	100	2	2	2	2	2	2	17.9283	17.7089	19.8501	18.9989	12.7858	2.50097	2.9448	2.688	2.1694	2.6184	2.2835	2.4785	100	100	100	100	100
822986	fibronectin type III domain containing 3a (predicted), isoform CRA_a [Rattus norvegicus]	K.DKMSS*PPPSPQK.C	S221*	1.22587	3.8076	149049931	Q8BX90		403469	GSK3_Kin (S203) 0.24% Erk1_Kin (S203) 0.26%	967350	629895	1.87734e+06	3.32705e+06	9.01764e+06	1.19133e+06	1.53573	0.564266	7.56938	689.808	689.808	689.81	689.81	689.811		31.741	2	2	2	2	2		1.66835	1.40722	4.50453	3.26415	5.03404		2.9948	3.0555	3.8076	3.566	3.2078		30.2302	23.8995	27.6042	31.741	27.6042
822987	fibronectin type III domain containing 3a (predicted), isoform CRA_a [Rattus norvegicus]	K.MSS*PPPSPQK.C	S221*	1.99033	3.3389	149049931	Q8BX90		403469	GSK3_Kin (S203) 0.24% Erk1_Kin (S203) 0.26%	2.23927e+06	5.5028e+06	1.01313e+07	19489844	2.89771e+06	529548	0.406932	0.519827	5.47205	568.248	568.248	568.248	568.251	568.251	568.252	39.9127	2	2	2	2	2	2	2.30738	3.27612	3.60197	8.43685	8.111	10.3743	3.0873	2.9923	2.9404	3.3389	2.6304	2.483	39.9127	33.8039	39.9127	39.9127	33.8039
825744	fibronectin type III domain containing 3a (predicted), isoform CRA_a [Rattus norvegicus]	K.MSS*PPPS*PQK.C	S221S225*	2.84667	3.027	149049931	Q8BX90		403469	GSK3_Kin (S207) 0.05% Cdc2_Kin (S207) 0.11% Cdk5_Kin (S207) 0.11% Erk1_Kin (S207) 0.18% GSK3_Kin (S203) 0.24% Erk1_Kin (S203) 0.26%	289872	519421	1.72462e+06	1.82033e+06	102728	19332.2	0.558067	0.947423	5.31385		608.232		608.231			40.8308		2		2				4.54973		2.84667				2.7836		3.027				32.0407		40.8308
822933	fibronectin type III domain containing 3a (predicted), isoform CRA_a [Rattus norvegicus]	K.CPS*PISEHNGLIK.G	S231*	0.385193	2.9431	149049931	Q8BX90		403469		4.02494e+06	3.48995e+06	68737.8	2.81203e+06	1.26589e+07	1.50125e+06	1.15329	0.0244442	8.43223	766.359	766.345		766.355	766.36		48.6251	2	2		2	2		8.2718	9.4406		3.25128	9.94312		2.7801	2.9431		2.7497	2.3868		46.8588	48.6251		46.8588	37.6956
825842	fibronectin type III domain containing 3a (predicted), isoform CRA_a [Rattus norvegicus]	K.CPS*PISEHNGLIK.G	S231*	2.14794	3.4844	149049931	Q8BX90		403469		4.39441e+06	1.64869e+06	10105.4	1.13428e+07	1209.8	525627	2.66539	0.000890909	0.00230163				511.239			83.4708				3						2.80734						3.4844						83.4708
823076	filamin, alpha (predicted), isoform CRA_a [Rattus norvegicus] [MASS=280493]	R.RAPS*VANVGSHCDLSLK.I	S2144*	0.116347	4.5914	149029877	P21333	2060		PKC_delta (S2152) 0.05% Akt_Kin (S2152) 0.19% Clk2_Kin (S2152) 0.33% PKA_Kin (S2152) 0.93%	6.96376e+06	8.29169e+06	9.53995e+06	4.00443e+06	1.15942e+06	8885842	0.839849	2.38235	0.130479	630.97	630.971	630.97	630.968	630.97	630.97	75.0882	3	3	3	3	3	3	2.98271	4.43705	3.75483	0.438947	3.17839	2.98271	4.577	4.179	4.5914	4.2279	3.4376	3.6297	54.4485	58.4247	75.0882	70.9643	42.4687
823478	filamin, alpha (predicted), isoform CRA_a [Rattus norvegicus] [MASS=280493]	R.APS*VANVGSHCDLSLK.I	S2144*	4.26563	4.2431	149029877	P21333	2060		PKC_delta (S2152) 0.05% Akt_Kin (S2152) 0.19% Clk2_Kin (S2152) 0.33% PKA_Kin (S2152) 0.93%	831829	9.00368e+06	771111	204766	2.17591e+06	2.64493e+06	0.0923877	3.76581	0.822675	867.907	867.908				867.915	83.4708	2	2				2	11.0214	11.4941				19.5351	4.2431	3.9323				3.8864	83.4708	71.755
824864	filamin, alpha (predicted), isoform CRA_a [Rattus norvegicus] [MASS=280493]	R.APS*VANVGSHCDLSLK.I	S2144*	0.317042	3.8068	149029877	P21333	2060		PKC_delta (S2152) 0.05% Akt_Kin (S2152) 0.19% Clk2_Kin (S2152) 0.33% PKA_Kin (S2152) 0.93%	2.22304e+06	6.9408e+06	1.31181e+06	347306	502123	1.07265e+06	0.320286	3.77711	0.468116		578.937	578.936	578.937			63.0971		3	3	3				5.15334	2.95712	4.4328				2.7869	3.8068	2.7116				43.8574	63.0971	23.9181
821972	filamin, beta (predicted) [Rattus norvegicus] [MASS=275314]	R.APS*VATVGSICDLNLK.I	S2083	0.875448	5.9013	149040087	O75369	4543	400358	PKC_delta (S2107) 0.07% Clk2_Kin (S2107) 0.45%	2.07221e+06	5.80841e+06	2.70433e+06	1.16664e+07	2.87395e+06	4.03262e+06	0.35676	0.231806	0.712677	862.929	862.922	862.916	862.922	862.92	862.932	90.579	2	2	2	2	2	2	12.9055	5.11932	2.73651	4.98018	2.08136	16.3028	4.6951	4.8868	5.9013	5.6048	4.9163	5.504	82.8127	76.7283	90.579	90.579	76.7252
823474	FIP1 like 1 (S. cerevisiae) (predicted) [Rattus norvegicus]	R.DHS*PTPSVFNSDEER.Y	S434*	0.0556572	4.6383	55249697	Q6UN15	9646	396378	Clk2_Kin (S418) 0.13% Akt_Kin (S418) 0.39%	1.30797e+07	4.75424e+06	2.91389e+06	2.33668e+06	2.57103e+06	4.122e+06	2.75116	1.24702	0.623734	898.863	898.865	898.864	898.864	898.857	898.863	51.1501	2	2	2	2	2	2	4.08522	5.39315	4.76423	4.56387	2.84409	3.0667	4.5659	4.6099	4.5543	4.6383	4.3405	4.5926	51.1501	44.6853	44.6853	44.6853	26.0224
824028	FIP1 like 1 (S. cerevisiae) (predicted) [Rattus norvegicus]	R.ERDHS*PTPSVFNSDEER.Y	S434*	0.470734	3.5707	55249697	Q6UN15	9646	396378	Clk2_Kin (S418) 0.13% Akt_Kin (S418) 0.39%	3.09978e+06	2.58598e+06	3.03768e+06	5.76364e+06	2.60171e+06	1.55491e+06	1.19869	0.527042	1.67322	694.624	694.628	694.628	694.626	694.634	694.628	27.7853	3	3	3	3	3	3	1.24888	6.23478	6.71512	4.15013	15.0536	7.13781	3.0858	2.8503	2.9316	3.5707	3.0784	2.6358	7.87106	6.0656	13.1326	27.7853	7.99612
824963	FIP1 like 1 (S. cerevisiae) (predicted) [Rattus norvegicus]	R.DHS*PTPSVFNSDEER.Y	S434*	0.384035	4.9331	55249697	Q6UN15	9646	396378	Clk2_Kin (S418) 0.13% Akt_Kin (S418) 0.39%	4.20196e+06	5.38367e+06	4.37841e+06	6.1221e+06	3.91502e+06	3.35595e+06	0.780501	0.715182	1.16659	599.579	599.578	599.577	599.577			17.8076	3	3	3	3			5.40429	3.56761	2.24298	2.75502			3.6781	2.7808	4.9331	3.7864			17.8076	6.19789	4.20216	10.9691
824870	FIP1 like 1 (S. cerevisiae) (predicted) [Rattus norvegicus]	R.DHS*PTPSVFNS*DEERYR.Y	S434S442*	1.99012	3.9949	55249697	Q6UN15	9646	396378	Clk2_Kin (S418) 0.13% Akt_Kin (S418) 0.39%	314251	149061	1.2427e+06	144488	270.067	634142	2.1082	8.60067	0.000425877			732.621	732.621			23.8877			3	3					1.99012	2.73698					3.1939	3.9949					19.2041	23.8877
824390	FIP1 like 1 (S. cerevisiae) (predicted) [Rattus norvegicus]	R.DHSPTPSVFNS*DEERYR.Y	S442*	1.24299	3.2257	55249697	Q6UN15	9646	396378		937995	366335	283950	669787	2.22434e+06	641.867	2.56049	0.423941	3465.42		705.963			705.967		18.0663		3			3			1.24299			3.94634			3.1728			3.2257			18.0663			13.9245
827650	FIP1 like 1 (S. cerevisiae) (predicted) [Rattus norvegicus]	R.DHSPTPSVFNS*DEER.Y	S442*	5.24288	3.8236	55249697	Q6UN15	9646	396378		1.30854e+07	2.24014e+06	117150	2.33668e+06	27768	ND	5.84135	0.0501353	27768	898.865						13.6615	2						5.24288						3.8236						13.6615
824859	FIP1 like 1 (S. cerevisiae) (predicted) [Rattus norvegicus]	R.DHSPT*PSVFNSDEER.Y	T436*	0.300549	5.221	55249697	Q6UN15	9646	396378		5.72581e+06	5.38494e+06	4.3964e+06	6.14082e+06	3.86909e+06	3.38042e+06	1.0633	0.71593	1.14456	599.577	599.579	599.577	599.578			13.2766	3	3	3	3			2.65484	5.19836	1.53057	3.36725			4.503	3.4826	5.221	5.1154			13.2766	6.93492	7.62964	12.6621
827629	FIP1 like 1 (S. cerevisiae) (predicted) [Rattus norvegicus]	R.DHSPT*PSVFNSDEER.Y	T436*	2.93313	4.1622	55249697	Q6UN15	9646	396378		1.30878e+07	1.76289e+06	68427.1	2.34187e+06	23081.7	654.933	7.42407	0.0292191	35.2428	898.862						5.92917	2						2.93313						4.1622						5.92917
824930	FIP-2 like protein [Rattus norvegicus]	R.KNS*ATPSELNEK.Q	S347	0.85144	4.7479	21743245	Q95KA2		405290	PKA_Kin (S345) 0.94%	5.35151e+06	8248045	455470	754631	5.81762e+06	731039	0.648821	0.603567	7.95802				699.32			29.8287				2						0.85144						4.7479						29.8287
826665	FIP-2 like protein [Rattus norvegicus]	R.TS*DSDQQAYLFQR.G	S532	6.73709	3.0691	21743245	Q8R5M4		405290		532989	760845	6.80459e+06	5.22599e+06	306631	525626	0.700522	1.30207	0.583363	819.849						-0.222764	2						6.73709						3.0691
823671	FIP-2 like protein [Rattus norvegicus]	R.T*SDSDQQAYLFQR.G	T531	1.51951	3.5922	21743245	Q8R5M4		405290		532989	949587	6.81309e+06	5.18089e+06	312966	669971	0.561285	1.31504	0.467133	819.849		819.846		819.851	819.854	31.6376	2		2		2	2	6.37094		3.53332		9.41603	13.5168	3.5922		3.3993		3.4545	3.5736	17.7815		31.6376		17.7815
827571	FK506 binding protein 3 (predicted), isoform CRA_b [Rattus norvegicus] [MASS=25179]	K.FLQDHGS*DSFLAEHK.L	S34*	0.883598	3.3253	149051312	P26884		397769		2.03609e+06	3.73889e+06	52314.8	171121	33867.4	ND	0.544569	0.305717	33867.4		905.893					3.52183		2						0.883598						3.3253						3.52183
823037	FK506 binding protein 3 (predicted), isoform CRA_b [Rattus norvegicus] [MASS=25179]	K.FLQDHGSDS*FLAEHK.L	S36*	1.40271	3.4814	149051312	P26884		397769		2.94378e+06	2.20694e+06	446334	1.63825e+06	553286	41023.1	1.33387	0.272446	13.4872	604.266		604.268	604.267	604.263		33.224	3		3	3	3		1.40271		4.83767	3.62826	3.04842		2.7922		3.4623	3.4814	3.3513		6.0656		33.224	30.2302	32.6992
821894	focal adhesion kinase; pp125FAK [Rattus norvegicus]	R.LQPQEIS*PPPTANLDR.S	S913*	0.711247	4.0828	2465667	Q05397	2859	413411	Erk1_Kin (S737) 0.62%	759067	1.0574e+06	972811	439418	3.19309e+06	344202	0.71786	2.21386	9.2768	928.459	928.457	928.454		928.459		36.7575	2	2	2		2		8.34092	6.62749	2.8827		8.27626		3.2449	3.7564	4.0828		3.9034		36.7575	30.2302	20.7239		19.3323
824179	folliculin [Rattus norvegicus]	R.AHS*PAEGASTDSSSPGPK.K	S62	1.54873	3.7358	38423528			396912	Clk2_Kin (S62) 0.44%	1.2766e+06	3.513e+06	2.10856e+06	830921	1.56441e+06	23002.2	0.363394	2.53762	68.0114		588.249	588.249		588.251		58.9185		3	3		3			3.21092	2.06498		6.01337			3.7358	3.577		3.4643			39.8922	58.9185		56.0765
824181	folliculin [Rattus norvegicus]	R.AHS*PAEGASTDSSSPGPK.K	S62	2.69468	5.4207	38423528			396912	Clk2_Kin (S62) 0.44%	4.97105e+06	2.50987e+06	2.69684e+06	1.78021e+06	3.1919e+06	3321.07	1.9806	1.5149	961.106	881.872	881.875	881.87		881.876		116.815	2	2	2		2		4.77666	8.58321	2.69468		9.34339		4.8607	4.3016	4.6697		5.4207		116.815	107.684	99.2187		110.417
824186	folliculin [Rattus norvegicus]	R.AHS*PAEGASTDSSS*PGPK.K	S62S73	1.30787	5.426	38423528			396912	Clk2_Kin (S62) 0.44% Cdk5_Kin (S73) 0.74% Cdc2_Kin (S73) 0.85%	784994	296658	1.81949e+06	1.98248e+06	527784	485036	2.64613	0.917788	1.08813			921.852		921.855		53.9162			2		2				1.30787		4.75389				4.5782		5.426				53.9162		43.8685
824248	folliculin [Rattus norvegicus]	R.AHS*PAEGASTDSSS*PGPK.K	S62S73	12.2319	3.9592	38423528			396912	Clk2_Kin (S62) 0.44% Cdk5_Kin (S73) 0.74% Cdc2_Kin (S73) 0.85%	ND	88202.6	687382	839250	214447	56863.3	1.13375e-05	0.819043	3.77127					614.91		10.8442					3						12.2319						3.9592						10.8442
827304	forkhead box J3 (predicted) [Rattus norvegicus] [MASS=68779]	K.VTLYNTDQDGSDS*PR.S	S223	10.5622	3.161	149035427	Q9UPW0	13549	399884		698913	1.2229e+06	229717	243907	162380	27741	0.571519	0.941822	5.85343		874.371					38.1697		2						10.5622						3.161						38.1697
822907	forkhead box K1 [Rattus norvegicus]	R.QS*PGPALAR.L	S87	0.256027	2.3067	167900441	-	18750			966014	3.70192e+06	2.48974e+06	3.83166e+06	985829	265622	0.26095	0.649781	3.7114	488.735	488.735	488.735	488.736	488.736	488.738	100	2	2	2	2	2	2	1.12652	1.3723	2.31447	3.62532	3.44099	8.6229	2.2447	2.3067	2.027	2.0477	2.1718	2.2264	100	100	100	100	100
825205	formiminotransferase-cyclodeaminase [Rattus norvegicus]	R.IS*SLLQEAK.T	S519	0.393062	2.9567	14286341	Q91XD4		395846		6.93637e+06	5.54914e+06	2.47525e+06	1.36256e+06	507606	3.08773e+06	1.24999	1.81662	0.164394	534.772	534.773	534.773	534.77			30.193	2	2	2	2			2.69528	4.7448	4.17393	0.393062			2.686	2.2221	2.2558	2.9567			30.193	30.193	27.6042	16.9461
825467	formiminotransferase-cyclodeaminase [Rattus norvegicus]	R.HRIS*SLLQEAK.T	S519	0.631566	4.0777	14286341	O88618		395846		1.69983e+06	1.37554e+06	2.06227e+06	108713	ND	15181.6	1.23576	18.9698	6.58694e-05	454.57	454.571	454.57				14.6862	3	3	3				0.631566	3.1872	1.57157				3.3664	3.6066	4.0777				14.6862	13.9358	13.9358
828144	formiminotransferase-cyclodeaminase [Rattus norvegicus]	R.ISS*LLQEAK.T	S520	1.20726	3.0456	14286341	Q91XD4		395846		6.93637e+06	5.65346e+06	2.47525e+06	866981	423293	311477	1.22692	2.85502	1.35899			534.771				27.6042			2						1.20726						3.0456						27.6042
823324	formin binding protein 4 [Rattus norvegicus] [MASS=115286]	R.ALEEGDGSVSGSS*PR.S	S485*	2.06201	5.0013	149022577	-	10996	399021		8.73217e+06	5.13715e+06	1.04538e+07	2.47817e+06	1.85928e+06	9.11381e+06	1.69981	4.21834	0.204007	764.325	764.326	764.322		764.324		30.193	2	2	2		2		6.29729	8.37891	3.10283		5.98308		4.7766	5.0013	4.8097		4.3802		27.6042	30.193	27.6042		23.8995
823590	formin binding protein 4 [Rattus norvegicus] [MASS=115286]	K.INENS*DKEAEVEESSEK.I	S552	3.47078	5.4372	149022577			399021		5.04063e+06	850578	2.17457e+06	546352	1557528	1.04002e+06	5.92612	3.98016	1.49759	1008.93	1008.92				1008.93	173.95	2	2				2	9.03886	6.55976				13.5805	5.4372	4.0414				3.4821	158.372	173.95
824758	formin binding protein 4 [Rattus norvegicus] [MASS=115286]	K.INENS*DKEAEVEESSEK.I	S552	3.91703	6.5711	149022577			399021		6.12511e+06	1367333	4.30578e+06	1.54043e+06	1.49168e+06	1.10584e+06	4.4796	2.79517	1.34891			672.95			672.957	125.29			3			3			3.91703			13.8136			6.5711			4.5962			125.29
824905	Fos-related antigen [Rattus norvegicus]	R.QPASLHGS*TELLPLSR.N	S180	1.85341	3.8636	1016712	Q91WG2		405692		30855.2	817398	255415	139882	302277	175496	0.0377481	1.82594	1.72241			595.97	595.969			8.45098			3	3					3.07969	1.85341					3.0611	3.8636					3.20331	8.45098
828104	fragile X mental retardation gene 2, autosomal homolog (predicted) [Rattus norvegicus] [MASS=63747]	R.TDGS*IS*GDRQPVTVADYISR.A	S508S510*	4.61908	4.2061	149053062	P51116	5629	401788		641284	887201	185151	52000.4	214117	40303.2	0.722818	3.56058	5.31265			766.338				14.0997			3						6.67828						4.2061						14.0997
827585	fragile X mental retardation gene 2, autosomal homolog (predicted) [Rattus norvegicus] [MASS=63747]	R.TDGSIS*GDRQPVTVADYISR.A	S510*	0.88858	5.1895	149053062	P51116	5629	401788		67662.1	ND	ND	32086.5	ND	ND	67662.1	3.11657e-05	1	739.678						13.3686	3						0.88858						5.1895						13.3686
822391	Fructose-1,6- biphosphatase 1 [Rattus norvegicus]	R.KTS*ANEPSEKDALQPGR.N	S144	0.209656	4.0372	50925519	P19112		405077		961498	1.19019e+06	2.53129e+06	2.44092e+06	4.51777e+06	43530.7	0.807851	1.03702	103.783				636.634	636.643		27.6042				3	3					0.59752	15.5667					4.0372	3.6134					27.6042	25.5751
822277	fructose-1,6-bisphosphatase 1 [Rattus norvegicus]	K.SRPS*LPLPQSR.A	S342	0.0379458	2.7951	6978831	P19112		405077		1.89173e+07	7.57482e+06	7.67625e+06	3.95584e+07	2.03829e+07	1.3128e+06	2.49739	0.194049	15.5263	659.338	659.34	659.338	659.338	659.337	659.347	49.8691	2	2	2	2	2	2	0.500885	3.83252	1.42676	1.14596	0.0531242	13.9335	2.7787	2.6013	2.502	2.7951	2.6039	2.5946	49.4124	29.9127	49.8691	49.4124	49.4124
822027	fructose-1,6-bisphosphatase 1 [Rattus norvegicus]	R.ES*PVHSICDELF.-	S353	2.30727	3.8608	6978831	P19112		405077		1.01858e+08	1.58141e+08	3.15207e+07	8.43037e+07	1.05445e+08	2.23515e+08	0.644096	0.373894	0.471758	756.815	756.814	756.81	756.81	756.819	756.812	62.4764	2	2	2	2	2	2	10.3	8.36297	3.7617	3.92037	14.6566	6.42595	3.5935	3.8608	3.1234	3.3628	3.6913	3.7684	58.1329	58.0006	62.4764	62.2536	58.0006
822337	fructose-1,6-bisphosphatase 1 [Rattus norvegicus]	R.ARES*PVHSICDELF.-	S353	0.0459837	4.0747	6978831	P19112		405077		1.52415e+07	6.8789e+08	1.80693e+09	1.85266e+09	1.40649e+09	4.47469e+08	0.0221568	0.975319	3.14321	870.385	870.382	870.38	870.382	870.38	870.383	80.3839	2	2	2	2	2	2	9.49555	6.05832	4.10403	5.9836	4.37418	7.17916	3.6016	4.0747	3.6303	3.8478	4.0517	3.6647	67.4031	67.0279	74.6175	67.4031	68.3411
825436	fructose-1,6-bisphosphatase 1 [Rattus norvegicus]	R.ARES*PVHSICDELF.-	S353	3.85112	3.2358	6978831	P19112		405077		ND	517127	7.92337e+06	6.47617e+06	ND	1.30937e+06	1.93376e-06	1.22347	7.63723e-07		1739.75	1739.76	1739.76			69.5942		1	1	1				3.85112	6.2365	9.39784				2.5029	3.2358	2.6777				42.0673	69.5942	54.1363
822576	fructose-1,6-bisphosphatase 1 [Rattus norvegicus]	R.ARES*PVHS*ICDELF.-	S353S357	1.48375	3.6284	6978831	P19112		405077		2.82587e+06	2.40172e+06	1.02564e+07	1.77192e+07	2.13542e+07	67485.1	1.1766	0.57883	316.429	910.366	910.367	910.362	910.362	910.369		100	2	2	2	2	2		7.03953	7.79238	2.35751	2.89056	9.66627		3.0826	2.654	3.2768	3.4579	3.6284		100	100	100	100	100
823706	fumarylacetoacetate hydrolase [Rattus norvegicus]	R.FGEPIPIS*K.A	S219	13.8075	3.0052	8393349	P35505		402583		ND	379311	6550.23	449578	358667	271168	2.63636e-06	0.0145697	1.32268						534.27	100						2						13.8075						3.0052
823664	fumarylacetoacetate hydrolase [Rattus norvegicus]	K.GEGMS*QAATICR.S	S309	8.42306	3.5025	8393349	P35505		402583		ND	ND	ND	ND	ND	ND	1	1	1						680.78	21.741						2						10.04						3.5025
822851	fumarylacetoacetate hydrolase [Rattus norvegicus]	K.VLPALS*PA.-	S417	0.0708021	2.0904	8393349	P35505		402583	PDZ_class1 (S417) 00%	2.41592e+08	3.38663e+08	1.6265e+07	4.41077e+07	8.95593e+07	1.04105e+08	0.71337	0.368757	0.86028	847.44	847.441	847.436	847.435	847.438	847.44	100	1	1	1	1	1	1	8.42538	9.79419	3.7407	2.87928	6.90316	8.77938	1.908	1.9015	1.7922	2.0904	1.9273	1.8409	100	100	100	100	100
823632	fumarylacetoacetate hydrolase [Rattus norvegicus]	R.AS*LQNLLSASQAQLR.D	S84	3.32172	4.2881	8393349	P25093		402583		2886924	1.72444e+06	1.60862e+06	2.68286e+06	539615	6.85054e+06	1.67413	0.599593	0.0787697			840.431	840.431		840.438	56.4627			2	2		2			4.77422	3.79795		12.9832			3.2638	4.2881		3.4398			30.0233	56.4627
822916	fumarylacetoacetate hydrolase [Rattus norvegicus]	K.GEGMSQAAT*ICR.S	T313	3.49125	4.2944	8393349	P35505		402583		323321	5.03328e+06	1.04064e+06	1.25133e+06	1.12998e+06	35004.8	0.0642367	0.831628	32.2807		680.775			680.78		69.606		2			2			3.49125			10.04			4.2944			3.9806			69.606			69.606
824414	FUS interacting protein (serine-arginine rich) 1 [Rattus norvegicus] [MASS=19971]	R.SRS*FDYNYR.R	S133*	11.2153	3.3178	68533686	O75494	5562	399654	Akt_Kin (S133) 00% PKC_zeta (S133) 0.05% Clk2_Kin (S133) 0.05%	206738	326263	904.625	29229.8	154708	15113	0.633653	0.0309487	10.2368					644.269		19.1283					2						11.2153						3.3178						19.1283
825981	FYN binding protein [Rattus norvegicus]	R.HTYGQKPSLS*TEDAQEEESIPK.N	S203	4.88226	5.0509	157821549			402863		16675.2	23218.5	200655	664506	29898.4	ND	0.71819	0.301961	29898.4			852.054				11.3033			3						4.88226						5.0509						11.3033
822885	FYN binding protein [Rattus norvegicus]	K.VAGQNS*PSGIQSK.K	S28	4.38406	4.5174	157821549			402863		1.58808e+06	453257	353428	1.29689e+06	2.07544e+06	3.41228e+06	3.5037	0.272519	0.608227		676.817			676.825		32.1312		2			2			4.38406			16.1166			4.1559			4.5174			26.0224			32.1312
823525	FYN binding protein [Rattus norvegicus]	-.IDYDS*LKR.K	S562	0.660855	2.5706	157821549			402863		6.77565e+06	1.03152e+07	1.64894e+07	1.70748e+07	922249	1.46289e+07	0.65686	0.965714	0.0630427	545.254	545.254	545.254	545.253		545.258	40.192	2	2	2	2		2	2.90041	2.56081	2.34052	1.44103		9.84848	2.3824	2.5706	2.4951	2.2304		2.5203	22.6067	32.342	40.192	38.1697
827301	FYVE, RhoGEF and PH domain containing 6 [Rattus norvegicus]	K.AAS*EELVEK.S	S500	1.01377	2.8654	212549635	Q69ZL1		398772		998705	1.01166e+06	202579	199363	156226	20783.5	0.987193	1.01613	7.51684		528.237		528.239			100		2		2				1.27905		4.60458				2.8654		2.8432				100		100
823450	G protein-coupled receptor kinase [Rattus norvegicus]	K.DVLDIEQFS*TVK.G	S484*	5.8221	4.1391	1707667	P32866	2925	401581		254654	15016.3	17661.7	333086	33428.3	515218	16.9584	0.0530243	0.0648818						737.355	23.8995						2						10.5449						4.1391
824953	G protein-coupled receptor kinase-associated ADP ribosylation factor GTPase-activating protein [Rattus norvegicus]	R.HGS*GAESDYENTQSGEPLLGLEGK.R	S601*	0.958868	6.4383	3978464	Q9Z272		403460	PKC_mu (S601) 0.91%	393856	810651	3.71564e+06	69749	73225.7	112951	0.485852	53.2716	0.648299	852.378	852.378	852.37				19.5861	3	3	3				9.6473	10.43	1.38938				5.9922	6.4383	5.7313				15.3262	14.4588	19.5861
826513	G protein-coupled receptor kinase-associated ADP ribosylation factor GTPase-activating protein [Rattus norvegicus]	R.HGS*GAESDY*ENTQSGEPLLGLEGK.R	S601Y607*	7.40775	5.4545	3978464	Q9Z272		403460	Fgr_SH2 (Y607) 0.17% Grb2_SH2 (Y607) 0.77% PKC_mu (S601) 0.91%	470745	758647	43006.7	189714	199012	358671	0.620506	0.226692	0.55486		879.031					8.54884		3						7.40775						5.4545						8.54884
827408	G protein-coupled receptor kinase-associated ADP ribosylation factor GTPase-activating protein [Rattus norvegicus]	R.HGSGAES*DYENTQSGEPLLGLEGK.R	S605*	6.33241	5.1631	3978464	Q9Z272		403460		393856	810651	134373	67267.4	66354.5	77986.1	0.485852	1.9976	0.85085		852.377					1.09144		3						9.41248						5.1631						1.09144
823711	GABA-B receptor-interacting scaffolding protein [Rattus norvegicus] [MASS=128489]	K.GS*SISDLADSVAYQSR.E	S103	3.38181	5.6811	78057970			399222		4.51522e+07	1.86844e+07	36974870	3.83757e+07	1.86664e+07	1.66125e+07	2.41657	0.963496	1.12363			868.384	868.385		868.386	60.7059			2	2		2			3.87726	4.86242		6.48129			5.6811	4.4865		3.6115			60.7059	35.4218
827193	GABA-B receptor-interacting scaffolding protein [Rattus norvegicus] [MASS=128489]	K.KGS*SISDLADSVAYQSR.E	S103	10.8216	3.4	78057970			399222		ND	415088	101600	921113	220212	1.98622e+06	2.40913e-06	0.110301	0.11087		932.438					32.2792		2						10.8216						3.4						32.2792
827177	GABA-B receptor-interacting scaffolding protein [Rattus norvegicus] [MASS=128489]	K.KGSS*ISDLADSVAYQSR.E	S104	11.8034	5.5933	78057970			399222		ND	419747	101600	1.33847e+06	220212	1.98622e+06	2.38239e-06	0.0759074	0.11087		932.439					16.9461		2						11.8034						5.5933						16.9461
821783	gamma-butyrobetaine hydroxylase [Rattus norvegicus]	R.INFNNAT*R.D	T295	0.00971391	2.8057	5825482	O75936	4498	397622		3.86289e+06	497111	5.88857e+06	2.45621e+06	1.55879e+06	3149.07	7.77067	2.39742	495.002	515.232		515.229	515.229	515.232		100	2		2	2	2		5.34262		0.252562	0.22342	5.22606		2.6231		2.8057	2.7267	2.5607		100		100	100	100
826292	gamma-glutamylcysteine synthetase light chain [Rattus sp.]	K.TLNEWSSQIS*PDLVR.E	S59	6.05525	4.986	425362	O09172		402742		353081	1.05489e+06	102852	43452.9	109435	18268.1	0.334709	2.36697	5.99046	912.937	912.936	912.936				37.6956	2	2	2				7.52384	6.70187	6.05525				4.23	4.986	4.0541				28.396	33.1745	37.6956
822554	gamma-PAK [Rattus sp.]	K.YLS*FTPPEK.D	S141*	0.507954	3.4367	1245844	Q13177	5428			5.9205e+06	8.46209e+06	2.25515e+06	6.16849e+06	5.0224e+06	3.80798e+06	0.69965	0.365592	1.31891	581.267	581.268	581.266	581.266	581.275	581.275	59.8254	2	2	2	2	2	2	3.34904	4.29607	1.35167	1.5583	17.4337	17.7436	3.0051	3.0511	3.3377	3.2218	3.4367	3.4001	59.8254	28.945	50.6181	59.8254	29.8287
822567	gamma-PAK [Rattus sp.]	K.YLS*FTPPEKDGFPSGTPALNTK.G	S141*	0.641562	4.7977	1245844	Q8CIN4				1.12451e+06	1.9028e+06	1.97909e+07	2.03889e+07	2.4485e+06	1.57937e+06	0.590979	0.970673	1.5503	816.394	816.394	816.391	816.389	816.404		33.3864	3	3	3	3	3		5.70864	5.30001	2.03093	0.641562	18.5151		4.1789	4.7756	4.6975	4.7977	4.2543		18.4321	21.8209	25.2895	25.8493	33.3864
822581	gamma-PAK [Rattus sp.]	K.YLS*FTPPEKDGFPS*GTPALNTK.G	S141S152*	1.04467	4.4117	1245844	Q8CIN4				1.28139e+06	1.88052e+06	486695	673384	2.71429e+06	2356.73	0.681403	0.722759	1151.72		843.053		843.046	843.059		17.2312		3		3	3			9.35444		1.04467	17.0033			4.4117		3.9676	3.784			13.2141		17.2312	6.25454
824456	gamma-PAK [Rattus sp.]	K.YLS*FTPPEKDGFPSGT*PALNTK.G	S141T154*	1.78464	5.4239	1245844	Q8CIN4				1.28139e+06	1.86984e+06	486695	673384	2.70944e+06	2356.73	0.685298	0.722759	1149.66	843.055	843.048		843.049	843.06		15.8488	3	3		3	3		12.1481	4.21031		5.00172	18.0162		4.4264	4.2733		5.4239	4.1979		10.8845	6.86604		13.2062	15.8488
824716	gamma-PAK [Rattus sp.]	R.S*TMVGTPYWMAPEVVTR.K	S401*	9.20239	3.6677	1245844	Q13153	2142	413344	PKC_epsilon (S421) 0.9%	798108	370995	35663.1	47941.1	273000	306218	2.15126	0.743894	0.891521						1002.96	45.8164						2						9.20239						3.6677
825214	gamma-PAK [Rattus sp.]	K.YLSFT*PPEKDGFPS*GTPALNTK.G	T143S152*	2.62749	3.9523	1245844	Q8CIN4			PDK1_Bind (T143) 0.68%	1.28672e+06	1.88487e+06	388255	673384	2.72227e+06	2356.73	0.682659	0.576572	1155.1				843.047			5.99313				3						2.62749						3.9523						5.99313
825153	gamma-PAK [Rattus sp.]	K.YLSFT*PPEKDGFPSGT*PALNTK.G	T143T154*	1.06049	5.8314	1245844	Q8CIN4			PDK1_Bind (T143) 0.68%	597060	1.88487e+06	388255	673384	2.72227e+06	2356.73	0.316764	0.576572	1155.1				843.046			-3.0103				3						1.06049						5.8314
823644	gap junction protein (aa 1-283) [Rattus norvegicus]	R.S*PGTGAGLAEK.S	S266	5.34903	3.1676	56206	O18968	2367	397132		222670	11359.6	69358.8	2.71068e+06	16270.8	397999	19.6019	0.0255872	0.0408816						534.245	37.7833						2						5.34903						3.1676
822828	GAPDH (aa 1-333) [Rattus norvegicus]	K.IVSNAS*CTTNCLAPLAK.V	S149	3.99499	4.7837	56188	P80534		412523		1.90299e+06	5.18279e+06	7.20128e+06	1.40176e+07	3.01282e+07	3.64689e+07	0.367174	0.513733	0.826133				950.443	950.443		22.6067				2	2					3.99499	4.88452					3.1771	4.7837					11.3033	22.6067
825689	GAPDH (aa 1-333) [Rattus norvegicus]	K.IVSNAS*CTTNCLAPLAK.V	S149	3.46865	3.2402	56188	P80534		412523		7287.5	360832	145688	3.25094e+06	6790.6	7605	0.0201964	0.0448142	0.892913				633.964			9.42795				3						3.46865						3.2402						9.42795
823606	GAPDH (aa 1-333) [Rattus norvegicus]	R.GAAQNIIPAS*TGAAK.A	S208	1.56583	4.1739	56188	O16027		416430		1.51828e+06	8.8708e+06	9.699e+06	2.6738e+07	7.10791e+07	3.09253e+07	0.171155	0.362743	2.29841		725.362	725.361	725.361	725.365	725.365	27.6042		2	2	2	2	2		4.65608	3.81454	3.39377	8.86376	9.3673		4.1739	2.6914	3.7233	3.8439	3.4385		27.6042		13.8917	9.77724
821886	GAPDH (aa 1-333) [Rattus norvegicus]	K.IVSNASCT*TNCLAPLAK.V	T151	0.257912	5.3781	56188	P80534		412523		3.15275e+06	8.92222e+06	3.22663e+06	1.47177e+07	4.99363e+07	2.62807e+07	0.353359	0.219235	1.90011	950.44	950.444	950.445	950.442	950.452	950.449	20.096	2	2	2	2	2	2	0.768473	5.39508	6.29513	3.21073	13.5586	10.6638	5.2105	4.9461	5.3781	4.8363	5.0615	4.5436	16.9461	20.096	16.9461	16.9461	16.9461
823704	GAPDH (aa 1-333) [Rattus norvegicus]	K.IVSNASCT*TNCLAPLAK.V	T151	1.95276	5.4174	56188	P80534		412523		34503.2	1.25443e+06	7124.82	812622	1.33206e+06	1.14258e+06	0.0275051	0.00876769	1.16583					633.968	633.963	30.2302					3	3					9.66372	1.95276					4.3004	5.4174					10.9255
825584	GAPDH (aa 1-333) [Rattus norvegicus]	K.VIHDNFGIVEGLMTTVHAITAT*QK.T	T182	3.64066	7.572	56188	P80534	713	416430		7191.12	68422.8	705339	4.95664e+06	2224.23	67887.4	0.105098	0.142302	0.0327636			892.451	892.451			35.1489			3	3					4.38823	4.76201					7.572	7.2137					35.1489	33.0476
822789	GAPDH (aa 1-333) [Rattus norvegicus]	R.GAAQNIIPAST*GAAK.A	T209	1.71068	4.0033	56188	O16027		416430		1.51828e+06	8.8708e+06	9.699e+06	2.6738e+07	7.10791e+07	3.09253e+07	0.171155	0.362743	2.29841		725.361	725.362	725.361	725.36	725.371	25.5751		2	2	2	2	2		3.73177	4.65608	2.973	1.71068	17.7067		4.0033	3.1004	3.4555	3.8059	3.5319		22.4677	20.096	25.5751	13.8917
824276	GAPDH (aa 1-333) [Rattus norvegicus]	R.GAAQNIIPAST*GAAK.A	T209	16.4927	3.7441	56188	O16027		416430		ND	8319.12	5004.77	230790	769564	16290	0.000120205	0.0216854	47.2415					1449.73		6.53213					1						16.4927						3.7441						6.53213
822190	Gars_predicted protein [Rattus norvegicus] [MASS=72030]	R.AEVS*ELPSVVR.D	S598	0.568894	4.4952	56971386			401196		1.69522e+06	1.5866e+06	2.03683e+06	921361	2.27594e+06	1.01785e+06	1.06846	2.21068	2.23602	633.313	633.314	633.312	633.313	633.317	633.308	87.5839	2	2	2	2	2	2	4.03755	5.19903	1.72248	4.51953	10.1136	3.96647	4.2521	3.8818	4.33	4.2105	3.3472	4.4952	87.5839	41.935	87.5839	80.4819	41.935
825695	GATA zinc finger domain containing 2A [Rattus norvegicus] [MASS=67569]	K.RPPS*PDVIVLS*DSEQPS*SPR.V	S96S103S109*	4.59423	5.1215	149035972	Q8CHY6		407007	Clk2_Kin (S10) 0.87% p38_Kin (S96) 01.01%	1.18163e+06	380377	4.90857e+06	4.99632e+06	262591	184568	3.10647	0.982436	1.42273	801.677			801.676			43.5174	3			3			5.81353			4.59423			5.1215			3.5893			43.5174			28.8982
827863	GATA zinc finger domain containing 2A [Rattus norvegicus] [MASS=67569]	K.RPPS*PDVIVLS*DSEQPS*SPR.V	S96S103S109*	2.82146	4.4503	149035972	Q8CHY6		407007	Clk2_Kin (S10) 0.87% p38_Kin (S96) 01.01%	151715	318317	4.28991e+06	3.80083e+06	939922	441355	0.476615	1.12868	2.12963			1202.01				63.0256			2						2.82146						4.4503						63.0256
825779	GATA zinc finger domain containing 2A [Rattus norvegicus] [MASS=67569]	K.RPPS*PDVIVLS*DSEQPSS*PR.V	S96S103S110*	2.38451	6.1091	149035972	Q8CHY6		407007	Cdc2_Kin (S110) 0.66% p38_Kin (S110) 0.84% Clk2_Kin (S10) 0.87% p38_Kin (S96) 01.01%	1.58326e+06	1.75685e+06	4.88017e+06	8.91321e+06	1.10124e+06	1.07558e+06	0.901189	0.547521	1.02386	801.677	801.682	801.676	801.675			48.2383	3	3	3	3			4.98124	11.6395	4.7482	3.14605			6.1091	4.3481	5.974	5.1409			44.6299	43.68	43.4537	48.2383
827864	GATA zinc finger domain containing 2A [Rattus norvegicus] [MASS=67569]	K.RPPS*PDVIVLS*DSEQPSS*PR.V	S96S103S110*	3.22928	6.3383	149035972	Q8CHY6		407007	Cdc2_Kin (S110) 0.66% p38_Kin (S110) 0.84% Clk2_Kin (S10) 0.87% p38_Kin (S96) 01.01%	151715	318317	4.28991e+06	3.80083e+06	939922	441355	0.476615	1.12868	2.12963			1202.01				59.7116			2						3.22928						6.3383						59.7116
827877	GATA zinc finger domain containing 2A [Rattus norvegicus] [MASS=67569]	K.RPPS*PDVIVLSDS*EQPSS*PR.V	S96S105S110*	3.60381	4.2197	149035972	Q8CHY6		407007	Cdc2_Kin (S110) 0.66% p38_Kin (S110) 0.84% Clk2_Kin (S10) 0.87% p38_Kin (S96) 01.01%	1.17441e+06	215865	5.42319e+06	2.48042e+06	5018	951837	5.4405	2.1864	0.00527191			801.675				24.1528			3						3.60381						4.2197						24.1528
826850	GATA zinc finger domain containing 2B [Rattus norvegicus] [MASS=65260]	R.LQQQAALS*PTTAPAVSSVSK.Q	S486	4.22471	5.6005	66910611	Q8WXI9	15094	404083	Erk1_Kin (S486) 0.41%	2.69281e+06	1.32146e+06	1.26725e+06	173979	700700	260856	2.03775	7.28393	2.68616	1032.53						19.8227	2						4.31676						5.6005						19.8227
822248	Gem-interacting protein (predicted) [Rattus norvegicus] [MASS=107196]	R.SLDS*PTSSPGAGAR.R	S434	0.52076	4.2739	149035956	Q6PGG2		409323		4.42687e+06	2.26751e+06	2073641	1.81053e+06	3.23817e+06	486891	1.95231	1.14532	6.6507		691.804		691.8	691.801		26.0224		2		2	2			4.78084		2.01795	0.52076			3.5013		2.7749	4.2739			26.0224		12.3145	13.9358
824550	Gem-interacting protein (predicted) [Rattus norvegicus] [MASS=107196]	R.SLDS*PTSS*PGAGAR.R	S434S438	0.998248	4.2299	149035956	Q6PGG2		409323		1.28718e+06	2.06649e+06	3.11149e+06	1.41185e+06	525177	1.29615e+06	0.622882	2.20384	0.405182		731.789	731.785	731.798		731.798	26.6508		2	2	2		2		7.00821	1.33328	19.192		19.3561		4.2299	4.1511	2.8782		3.7356		26.6508	15.2186	21.4912
822408	gene 33 polypeptide [Rattus rattus]	R.SHS*GPAGSFNKPAIR.I	S250	0.0747313	4.6253	57569	Q9UJM3	9218	405493	1433_m1 (S250) 0.09% Clk2_Kin (S250) 0.47%	8.78335e+06	1.50367e+07	3.77547e+07	2.90748e+07	3.02023e+06	1.11261e+06	0.584129	1.29854	2.71455	535.926	535.923	535.923	535.924	535.925	535.927	50.6181	3	3	3	3	3	3	7.03092	0.759767	0.871864	1.67522	5.09416	8.51307	4.106	4.6253	4.4193	3.825	4.4736	3.0297	50.6181	41.0518	41.229	35.0978	44.4221
826079	gene 33 polypeptide [Rattus rattus]	R.SHS*GPAGSFNKPAIR.I	S250	0.691264	4.1995	57569	Q9UJM3	9218	405493	1433_m1 (S250) 0.09% Clk2_Kin (S250) 0.47%	510440	1.51205e+06	9.32189e+06	6.38988e+06	390968	71657.4	0.337582	1.45885	5.45607		803.384	803.381				25.4218		2	2					4.77655	1.3763					3.0052	4.1995					15.1851	25.4218
823763	Gephyrin [Rattus norvegicus]	K.VKEVHDELEDLPS*PPPPLS*PPPTTSPHK.Q	S188S194*	1.00297	5.4145	56312	Q9NQX3	4893		Erk1_Kin (S194) 00% GSK3_Kin (S194) 0.01% Erk1_Kin (S188) 0.11% GSK3_Kin (S188) 0.22% p38_Kin (S194) 0.39% Cdc2_Kin (S194) 0.57%	1.34945e+07	835157	4343068	2.74026e+06	484112	2.79819e+06	16.158	1.58491	0.173009		1067.5	1067.5	1067.51		1067.51	44.6188		3	3	3		3		2.26528	1.00297	6.17088		7.6925		4.925	5.4145	4.2416		4.9376		28.3615	44.6188	27.4149
823771	Gephyrin [Rattus norvegicus]	K.EVHDELEDLPS*PPPPLS*PPPTTSPHK.Q	S188S194*	0.0403588	5.2551	56312	Q9NQX3	4893		Erk1_Kin (S194) 00% GSK3_Kin (S194) 0.01% Erk1_Kin (S188) 0.11% GSK3_Kin (S188) 0.22% p38_Kin (S194) 0.39% Cdc2_Kin (S194) 0.57%	1.74877e+07	8.37051e+06	3.78059e+07	2.73924e+07	1.4221e+06	9.87824e+06	2.08921	1.38016	0.143963	991.79	991.796	991.786	991.788		991.78	69.1607	3	3	3	3		3	7.90353	14.2464	4.27128	5.9327		2.56615	5.1945	4.2001	5.2551	5.0993		4.8526	62.355	55.1223	69.1607	53.9293
827070	Gephyrin [Rattus norvegicus]	K.EVHDELEDLPS*PPPPLSPPPTTS*PHK.Q	S188S200*	15.4773	4.0323	56312	Q9NQX3	4893		Erk1_Kin (S188) 0.11% GSK3_Kin (S188) 0.22% Cdk5_Kin (S200) 0.25% Cdc2_Kin (S200) 0.43%	14008.9	5.89667e+06	73455.5	106868	15205589	230172	0.00237573	0.687348	66.0619		991.797					26.4441		3						15.4773						4.0323						26.4441
822729	Gephyrin [Rattus norvegicus]	K.EVHDELEDLPS*PPPPLSPPPT*TSPHK.Q	S188T198*	0.0403588	5.8043	56312	Q9NQX3	4893		Erk1_Kin (S188) 0.11% GSK3_Kin (S188) 0.22% GSK3_Kin (T198) 0.69%	1.74695e+07	8.36539e+06	3.78059e+07	2.73924e+07	1.53153e+07	3.87211e+07	2.08831	1.38016	0.395528	991.793	991.793	991.787	991.788	991.789	991.8	77.7048	3	3	3	3	3	3	10.5503	10.8598	5.08518	6.09414	7.04255	18.003	4.9555	5.8043	5.5004	4.7011	4.8118	4.6045	40.9221	39.3001	56.0127	29.4649	77.7048
825988	Gephyrin [Rattus norvegicus]	K.EVHDELEDLPS*PPPPLSPPPTT*SPHK.Q	S188T199*	2.73094	4.5707	56312	Q9NQX3	4893		Erk1_Kin (S188) 0.11% GSK3_Kin (S188) 0.22%	5.43433e+06	114331	3.253e+06	3.44544e+06	9753.6	15260	47.5316	0.944148	0.639163	991.787		991.788				35.2809	3		3				5.00782		6.09414				4.5707		3.4899				35.2809		14.5945
826107	Gephyrin [Rattus norvegicus]	K.EVHDELEDLPSPPPPLS*PPPTTSPHK.Q	S194*	8.79591	4.7748	56312	Q9NQX3	4893		Erk1_Kin (S194) 00% GSK3_Kin (S194) 0.01% p38_Kin (S194) 0.39% Cdc2_Kin (S194) 0.57%	76880	5.11346e+06	6.83647e+06	6.57234e+06	92584.8	184773	0.0150348	1.04019	0.501074		965.135					10.5495		3						8.79591						4.7748						10.5495
823858	Gephyrin [Rattus norvegicus]	K.EVHDELEDLPSPPPPLSPPPTTS*PHK.Q	S200	16.7795	4.3216	56312	Q9NQX3	4893		Cdk5_Kin (S200) 0.25% Cdc2_Kin (S200) 0.43%	553.425	588266	324565	3.96739e+06	120687	2.3711e+06	0.000940773	0.0818083	0.0508992						965.143	5.5055						3						16.7795						4.3216
825955	Gephyrin [Rattus norvegicus]	R.ASHS*AVDITK.V	S305	0.956245	3.3952	56312	Q9NQX3	4893	399848		625888	129774	1.28888e+06	1.56217e+06	2.08308e+06	5800.93	4.8229	0.825057	359.094	554.755		554.757				35.3857	2		2				0.956245		3.66258				3.3952		3.0955				35.3857		32.342
823906	Gephyrin [Rattus norvegicus]	K.EVHDELEDLPSPPPPLSPPPT*TSPHK.Q	T198*	8.9307	5.4035	56312	Q9NQX3	4893		GSK3_Kin (T198) 0.69%	76880	5.11346e+06	6.83647e+06	6.57234e+06	135807	2.3822e+06	0.0150348	1.04019	0.0570092		965.136				965.138	8.01632		3				3		9.24866				11.2739		5.4035				4.0931		8.01632
827959	GHS transferase YA subunit (452 is 2nd base in codon) [Rattus norvegicus]	-.MS*GKPVLHYFNAR.G	S2	2.8192	3.471	56330			413027		8850.62	183545	656089	1.25613e+06	42349.3	50657.1	0.0482204	0.52231	0.835999				800.376			20.3659				2						2.8192						3.471						20.3659
822807	GHS transferase YA subunit (452 is 2nd base in codon) [Rattus norvegicus]	K.LIQS*PEDLEK.L	S37	6.74339	2.8583	56330	P04903		410259		1.74178e+06	2.98591e+06	3.08137e+06	6.64393e+06	347581	2.66825e+06	0.583334	0.463788	0.130266					626.303	626.301	100					2	2					9.47588	6.74339					2.7423	2.8583					100
825053	glioma tumor suppressor candidate region gene 1 (predicted), isoform CRA_a [Rattus norvegicus] [MASS=136707]	R.GAGS*PTPLPTK.V	S1183	0.93168	3.2323	149056913			401308		88425.9	70846.3	569841	718595	6482869	68079.6	1.24814	0.792994	95.2249			553.269	553.27			39.2689			2	2					1.26636	3.25635					3.0996	3.2323					29.8287	39.2689
821999	glutamate dehydrogenase (AA 1-558) [Rattus norvegicus]	R.DDGS*WEVIEGYR.A	S128	0.63098	4.3096	56198	P00366	2143	400781		1.85593e+06	2.66289e+06	913212	1.32693e+06	1.94159e+06	3.07874e+06	0.696959	0.688215	0.630645	753.306	753.308	753.302	753.305	753.314	753.302	140.451	2	2	2	2	2	2	7.12006	8.9864	1.93279	5.82491	17.6605	1.60734	4.3096	4.2576	4.1822	3.917	4.2457	3.5345	140.451	115.052	140.451	126.212	120.961
827384	glutamate dehydrogenase (AA 1-558) [Rattus norvegicus]	R.RDDGS*WEVIEGYR.A	S128	9.73695	3.3486	56198	P00366	2143	400781		84497.6	127732	ND	ND	108177	78036.2	0.66152	1	1.38624	831.359						70.3201	2						9.73695						3.3486						70.3201
822645	glutamate dehydrogenase (AA 1-558) [Rattus norvegicus]	K.NLNHVS*YGR.L	S450	0.289601	2.3152	56198	P82264	2143	400781		5.72679e+06	2.48338e+06	1.72793e+06	2.32744e+06	6.43621e+06	9.36074e+06	2.30604	0.742416	0.687575	570.256	570.254	570.253		570.258	570.258	27.6042	2	2	2		2	2	4.25624	1.448	0.289601		8.96877	7.36283	2.183	2.3152	2.2113		2.2944	2.1544	19.0849	23.8995	21.214		23.8995
822573	glutamate dehydrogenase (AA 1-558) [Rattus norvegicus]	R.GAS*IVEDKLVEDLK.T	S79	0.369722	4.3059	56198	P00366		400781		293119	231863	4.20075e+06	79075.8	548432	686556	1.26419	53.1231	0.798817			798.402	798.404	798.406	798.404	100			2	2	2	2			2.58805	4.58077	7.33173	5.03822			3.9241	4.3059	4.2132	4.1522			100	100	100
828019	glutamate dehydrogenase (AA 1-558) [Rattus norvegicus]	R.GAS*IVEDK.L	S79	2.94971	2.8374	56198	P00366	2143	400781		1.19364e+06	39150.6	450560	671509	4810.3	32866.1	30.4883	0.670965	0.14636				449.701			100				2						3.89584						2.8374						100
822830	glutamate oxaloacetate transaminase 2; Glutamate oxaloacetate transaminase 2, mitochondrial (aspartate aminotransferase 2) [Rattus norvegicus]	R.VGAS*FLQR.F	S143	12.1884	3.426	6980972	P05202		401705		8223.7	38266.8	ND	241476	178256	22044.9	0.214904	4.1412e-06	8.08603					479.237		100					2						12.1884						3.426						100
821967	glutamine fructose-6-phosphate transaminase 1 [Rattus norvegicus]	R.VDS*TTCLFPVEEK.A	S243*	0.810124	4.9962	54400724	Q06210	702	405701		8.8697e+07	5.10345e+07	1.2117e+08	1.1835e+08	9.79691e+07	1.35224e+08	1.73798	1.02382	0.724497	802.854	802.853	802.851	802.852	802.852	802.854	30.193	2	2	2	2	2	2	5.98865	4.23756	2.03154	3.09716	3.62685	5.90764	4.9962	4.6376	4.5723	4.3486	4.5301	4.9543	27.6042	27.6042	27.6042	25.5751	27.6042
826291	glutamine fructose-6-phosphate transaminase 1 [Rattus norvegicus]	R.VDS*TTCLFPVEEK.A	S243*	0.392599	3.2754	54400724	Q06210	702	405701		830536	960807	6.29393e+06	5.84813e+06	2.7167e+06	912751	0.864415	1.07623	2.97638	1604.71	1604.69	1604.7	1604.7			19.9564	1	1	1	1			11.5099	0.629404	6.03228	6.48719			3.036	3.0133	3.1998	3.2754			19.9564	19.9564	19.9564	19.9564
826442	glutamine fructose-6-phosphate transaminase 1 [Rattus norvegicus]	R.VDST*TCLFPVEEK.A	T244*	4.16278	3.9032	54400724	Q06210	702	405701		8.8697e+07	3.43991e+07	6.65566e+06	1.1835e+08	1.27812e+08	1.00962e+08	2.57847	0.0562371	1.26594	802.857	802.863	802.853				13.8917	2	2	2				9.11693	16.5948	4.16278				3.5536	3.9032	3.3729				10.7918	9.77724	13.8917
822336	glutamine synthetase (AA 1-373) [Rattus norvegicus]	R.RPS*ANCDPYAVTEAIVR.T	S343	3.49189	4.2541	57577	Q9QY94			PKA_Kin (S343) 0.43%	37798.8	37456.4	66773.4	ND	2.62222e+06	3.63634e+06	1.00914	66773.4	0.721116					999.977	999.967	95.5981					2	2					17.9645	8.68466					4.0703	4.2541					71.755
824613	glutamine synthetase (AA 1-373) [Rattus norvegicus]	R.RPS*ANCDPYAVTEAIVR.T	S343	11.6865	4.0544	57577	Q9QY94			PKA_Kin (S343) 0.43%	230665	ND	206571	ND	ND	1.42267e+06	230665	206571	7.02902e-07						666.967	23.0777						3						11.6865						4.0544
821946	glutathione peroxidase [Rattus norvegicus]	R.PLAGGEPVSLGS*LR.G	S32	2.61041	4.5896	2654236	P07203	11749			1.86721e+06	1.34479e+06	2.98187e+06	5.40188e+06	2.22397e+06	1.2022e+07	1.38848	0.552005	0.184991		716.868	716.867	716.867	716.869	716.876	51.9673		2	2	2	2	2		6.95875	4.40419	4.32044	7.3845	17.9516		4.1568	4.3589	4.5896	4.2784	3.6784		30.667	51.9673	48.3877	48.3877
823755	glutathione peroxidase [Rattus norvegicus]	R.PLAGGEPVSLGS*LRGK.V	S32	5.4517	3.2813	2654236	P07203	11749			ND	ND	7215.02	1.16448e+06	106325	1.56397e+06	1	0.0061959	0.0679839						539.953	18.7249						3						5.4517						3.2813
822849	glutathione peroxidase [Rattus norvegicus]	R.NALPAPSDDPTALMT*DPK.Y	T143	2.16665	4.257	2654236	P04041				40632.7	386778	1.16998e+06	363354	1.50227e+06	3.7796e+06	0.105054	3.21996	0.397467					967.449	967.432	76.3394					2	2					15.6369	2.16665					4.257	4.2266					76.3394
824321	glutathione peroxidase [Rattus norvegicus]	K.Y*IIWSPVCR.N	Y147	2.56756	2.692	2654236	P11352				245228	309420	951006	1.85664e+06	1.19881e+06	822345	0.792543	0.51222	1.4578				637.295	637.304		68.5184				2	2					2.56756	15.6957					2.2547	2.692					67.1157	68.5184
826754	glutathione S-transferase omega 1 [Rattus norvegicus]	R.SLGKGS*APPGPVPEGQIR.V	S13	4.84968	3.8245	27684369	O09131		402095		8104.8	1.09238e+06	ND	ND	ND	ND	0.00741941	1	1		609.646							3						4.84968						3.8245
826689	glutathione S-transferase omega 1 [Rattus norvegicus]	R.S*LGKGSAPPGPVPEGQIR.V	S8	3.62358	3.7028	27684369	O09131		402095		11843	885023	11297.1	3.65503e+06	3570.47	8595	0.0133816	0.00309085	0.415412		913.968		913.965			35.7959		2		2				6.89682		3.62358				3.7028		3.3854				35.7959		22.3408
823801	glutathione S-transferase Yb3 subunit [Rattus norvegicus]	K.LGLDFPNLPYLIDGS*HK.I	S67	2.14253	4.7507	529588	P10649		406085		1090.17	ND	1204.25	1.49419e+06	2583.73	1.99747e+06	1090.17	0.000805953	0.0012935				660.329		660.333	63.0585				3		3				2.60741		8.62058				4.7507		4.5525				45.1329
823802	glutathione S-transferase Yb3 subunit [Rattus norvegicus]	K.LGLDFPNLPYLIDGS*HK.I	S67	1.68775	5.0882	529588	P10649		406085		ND	ND	5028.2	661720	1353.4	280533	1	0.00759868	0.00482439				989.989		990.003	75.823				2		2				1.68775		15.6898				4.0968		5.0882				52.8501
822706	glutathione S-transferase Yrs-Yrs [Rattus norvegicus]	R.NRNS*MVLALQR.L	S138	6.46312	4.6926	220757	P30713		408817		205478	6019.73	366457	1908525	858395	524209	34.1341	0.19201	1.6375					461.233	461.237	100					3	3					6.46312	14.7427					4.0836	4.6926					100
823749	glutathione S-transferase Yrs-Yrs [Rattus norvegicus]	R.NRNS*MVLALQR.L	S138	0.0434255	4.3882	220757	P30713		408817		1.22611e+06	1.7041e+07	4.66052e+06	1.41403e+07	8.51951e+07	8.47851e+07	0.0719509	0.329591	1.00484	691.345	691.347	691.345	691.346	691.346	691.35	100	2	2	2	2	2	2	3.6622	7.72968	3.92999	4.89982	5.87688	11.4425	3.9512	4.3133	3.5318	4.0122	4.3882	4	100	100	100	100	100
822767	glutathione transferase [Rattus norvegicus]	K.VLKS*HGQDYLVGNR.L	S142	4.67638	4.3665	576438	P13745		413027		95815.2	875219	971589	4.6946e+06	1.85372e+06	4.72985e+06	0.109476	0.206959	0.391919					555.947	555.944	51.5204					3	3					8.96252	4.67638					4.2681	4.3665					51.2976
826654	glutathione transferase [Rattus norvegicus]	K.S*HGQDYLVGNR.L	S142	3.50039	3.4211	576438	P13745		413027		6.39804e+06	9.96529e+06	3.36881e+06	6.29825e+06	1.59809e+06	5073020	0.642033	0.53488	0.315018	663.289	663.288					63.5061	2	2					5.73338	4.69987					2.4675	3.4211					57.4824	63.5061
822764	glutathione-S-transferase, alpha type2; Glutathione-S-transferase, alpha type (Yc?) [Rattus norvegicus]	R.ISS*LPNVKK.F	S190	2.60892	2.5998	8393499	P13745		413027	1433_m1 (S190) 0.1% Akt_Kin (S190) 0.89%	27139.6	5.60549e+06	9.05495e+06	4.24491e+07	3.49251e+07	5.62146e+07	0.0048416	0.213313	0.621282		533.291	533.29		533.294	533.29	33.8039		2	2		2	2		3.75384	2.83415		9.25317	2.72154		2.5413	2.5998		2.4482	2.4471		33.8039	33.8039		33.8039
822791	glutathione-S-transferase, alpha type2; Glutathione-S-transferase, alpha type (Yc?) [Rattus norvegicus]	R.ISS*LPNVK.K	S190	0.288007	2.7255	8393499	P13745		413027	1433_m1 (S190) 0.1% Akt_Kin (S190) 0.89%	5.98493e+06	9.58852e+06	1.34521e+07	2.28491e+07	2.18987e+07	2.08587e+06	0.624176	0.588737	10.4986	469.243	469.243	469.242	469.242	469.244	469.244	39.9127	2	2	2	2	2	2	3.48808	2.63473	1.79204	1.72804	6.5388	6.02679	2.5598	2.7255	2.6855	2.6649	2.6862	2.5886	39.9127	39.9127	39.9127	39.9127	39.9127
822817	glutathione-S-transferase, alpha type2; Glutathione-S-transferase, alpha type (Yc?) [Rattus norvegicus]	K.FIQS*PEDLEK.L	S37	2.21691	3.1217	8393499	P13745		413027		378558	782657	4.22127e+06	4.43216e+06	2.65976e+06	2.8506e+06	0.483683	0.952417	0.933055			643.291	643.291	643.294		100			2	2	2				2.97921	2.21691	7.06296				3.1217	2.854	3.0916				100	100	100
822219	Glutathione-S-transferase, mu type 2 (Yb2); glutathione S-transferase Yb2 subunit [Rattus norvegicus]	R.LQLAMVCYS*PDFER.K	S117	2.35518	5.696	28933457	P08010		406085		215353	331200	2.40494e+06	2.26124e+06	161385	263151	0.65022	1.06355	0.613281			904.894	904.895	904.903	904.9	33.8039			2	2	2	2			3.57147	4.64953	12.7488	10.0454			5.696	4.731	3.9353	4.6299			33.8039	33.8039	33.8039
823760	glycine N-methyltransferase [Mus musculus]	R.TRS*LGVAAEGLPDQYADGEAAR.V	S10*	3.53233	5.1994	6552346	Q14749	5970			49980.1	474821	885366	3.40673e+06	1.13113e+06	3.12633e+06	0.105261	0.259887	0.361807				776.364		776.369	10.3253				3		3				4.15973		10.9278				5.1994		4.8748				5.27678
827878	glycine N-methyltransferase [Mus musculus]	R.S*LGVAAEGLPDQYADGEAAR.V	S10*	1.99524	5.741	6552346	Q14749	5970			986404	1.13368e+06	6.07248e+06	1.29315e+07	1.87067e+06	5.33972e+06	0.870092	0.469587	0.35033			1035.47	1035.46			102.856			2	2					3.05808	2.34791					5.5955	5.741					102.856	98.9908
824163	glycogen synthase 2 (liver) [Rattus norvegicus]	R.S*LSVTSLGGLPAWEAER.L	S6	2.44483	5.3986	6981002	P17625		402318		2.94874e+06	1.47501e+06	4.99657e+06	1.10451e+07	5.49609e+06	4.04845e+06	1.99913	0.452377	1.35758			926.948	926.948	926.952		22.043			2	2	2				2.44483	2.70928	7.18874				5.0905	4.5163	5.3986				6.77781	22.043	15.2288
827820	glycogen synthase 2 (liver) [Rattus norvegicus]	K.FYLEPTS*PPTTDGFK.Y	S626	1.12935	4.4854	6981002	P17625			p38_Kin (S626) 0.1% Erk1_Kin (S626) 0.61%	3.54854e+06	1.532e+06	5.35772e+06	1.32175e+06	795913	718135	2.31628	4.05352	1.10831			890.398				12.0862			2						1.12935						4.4854						12.0862
822029	glycogen synthase 2 (liver) [Rattus norvegicus]	R.SLS*VTSLGGLPAWEAER.L	S8	0.599066	6.1525	6981002	P17625		402318	Akt_Kin (S8) 0.03% Clk2_Kin (S8) 0.34%	2.94874e+06	1.47501e+06	4.99657e+06	1.10451e+07	5.49609e+06	4.04845e+06	1.99913	0.452377	1.35758			926.949	926.949	926.955	926.952	26.0224			2	2	2	2			3.76169	3.76169	9.82243	7.11858			6.1525	5.2513	5.6376	4.6343			26.0224	14.8319	10.6145
827819	glycogen synthase 2 (liver) [Rattus norvegicus]	K.FYLEPT*SPPTTDGFK.Y	T625	5.59052	3.5987	6981002	P17625				3.35471e+06	1504167	5.29328e+06	1.2326e+06	868955	723086	2.23028	4.29438	1.20173			890.402				12.0862			2						5.59052						3.5987						12.0862
827997	glycogen synthase kinase 3 alpha (AA 1 - 483) [Rattus norvegicus]	R.GEPNVS*YICSR.Y	S278*	3.04798	2.2395	56332	P49840	5418	396671		273007	58907.4	4.849e+06	4.68324e+06	2.4924e+06	102622	4.6345	1.03539	24.2871			1361.56				16.9461			1						6.0078						2.2395						16.9461
821813	glycogen synthase kinase 3 alpha (AA 1 - 483) [Rattus norvegicus]	R.GEPNVSY*ICSR.Y	Y279*	0.124857	3.5116	56332	P49840	5418	396671		2.16567e+07	4.78658e+07	7.81883e+07	7.64281e+07	1.09429e+08	3.04293e+07	0.452447	1.02303	3.59618	681.282	681.284	681.284	681.283	681.286	681.292	30.193	2	2	2	2	2	2	1.38077	4.3406	3.35644	2.54855	6.22079	14.8284	3.4199	3.1896	3.3046	3.2032	3.5116	3.4505	30.193	30.193	30.193	30.193	27.6042
827867	glycogen synthase kinase 3 alpha (AA 1 - 483) [Rattus norvegicus]	R.GEPNVSY*ICSR.Y	Y279*	3.13611	2.5464	56332	P49840	5418	396671		273007	58907.4	4.849e+06	4.68324e+06	2.4924e+06	102622	4.6345	1.03539	24.2871			1361.56	1361.56			16.9461			1	1					5.38352	6.0078					2.5006	2.5464					13.8917	16.9461
825656	glycoprotein IIIa [Mus musculus]	K.GS*GSS*A.-	S99S102	19.8844	1.5221	1778856					ND	ND	213502	138348	ND	23549.2	1	1.54322	4.24642e-05			625.114				10.7133			1						19.8844						1.5221						10.7133
825807	growth arrest-specific 2 [Rattus norvegicus]	K.EIEQEETLSAPS*PSPSPSSK.S	S184	4.4817	4.026	189011542	O43903	4158	404541	GSK3_Kin (S184) 0.02% Erk1_Kin (S184) 0.44%	6.54432e+06	8.74701e+06	5.7543e+06	4.07316e+06	6.96023e+06	1.85206e+06	0.748178	1.41274	3.75811			1090.49				10.1889			2						4.4817						4.026						10.1889
822947	growth arrest-specific 2 [Rattus norvegicus]	K.EIEQEETLSAPSPS*PSPSSK.S	S186	0.146791	5.3707	189011542	O43903	4158	404541	GSK3_Kin (S186) 0.17% Erk1_Kin (S186) 0.65%	6.54925e+06	8.71375e+06	6.04701e+06	4.07315e+06	6.92893e+06	1.84659e+06	0.7516	1.4846	3.7523	1090.49	1090.49	1090.49	1090.49	1090.5	1090.49	53.8485	2	2	2	2	2	2	4.22482	3.5505	5.45419	2.76609	17.3257	7.24777	5.1011	5.3707	4.991	5.2686	4.9156	4.0626	26.0224	44.6853	53.8485	44.6853	16.118
825677	growth arrest-specific 2 [Rattus norvegicus]	K.EIEQEETLSAPSPSPS*PSSK.S	S188	4.66519	4.0644	189011542	O43903	4158	404541	GSK3_Kin (S188) 0.2% Cdc2_Kin (S188) 0.61% Erk1_Kin (S188) 0.69% Cdk5_Kin (S188) 0.7%	265288	1.13362e+06	1.95835e+06	2.40869e+06	556833	149097	0.234018	0.813037	3.73471				727.33			2.82547				3						4.66519						4.0644						2.82547
825809	growth arrest-specific 2 [Rattus norvegicus]	K.EIEQEETLSAPSPSPS*PSSK.S	S188	1.27066	5.6192	189011542	O43903	4158	404541	GSK3_Kin (S188) 0.2% Cdc2_Kin (S188) 0.61% Erk1_Kin (S188) 0.69% Cdk5_Kin (S188) 0.7%	6.54432e+06	8.744e+06	5.75076e+06	4.07316e+06	6.97503e+06	1.85206e+06	0.748436	1.41187	3.7661	1090.49	1090.49	1090.49				26.0224	2	2	2				1.27066	7.47254	5.78905				4.4599	3.2245	5.6192				26.0224	22.4115	26.0224
827498	growth arrest-specific 2 [Rattus norvegicus]	K.EIEQEETLSAPSPSPSPSS*K.S	S191	7.69273	3.324	189011542	O43903	4158	404541		6.53339e+06	8.74147e+06	5.74293e+06	4.06699e+06	6.96365e+06	1.8417e+06	0.747402	1.41208	3.78109		1090.49					8.53872		2						7.69273						3.324						8.53872
822215	growth arrest-specific 2 like 1 (predicted), isoform CRA_b [Rattus norvegicus]	R.GPS*PGPELAATPASIFR.T	S493	3.42135	4.4764	149047595	Q8JZP9		400225	GSK3_Kin (S493) 0.11%	285334	599776	1.37033e+06	3.0301e+06	613862	400546	0.475735	0.45224	1.53256		874.43	874.43	874.429	874.428		131.161		2	2	2	2			6.21334	6.35637	5.235	3.70169			3.4972	4.2872	4.4764	4.2368			88.0363	91.7708	131.161	94.2076
824084	growth factor receptor binding protein GRB7 [Rattus norvegicus]	R.LSYLGS*PPLR.S	S364	4.65082	3.4184	6018122	Q03160		398850	Cdc2_Kin (S364) 0.6% Cdk5_Kin (S364) 0.62%	39930.4	1928.17	196565	ND	662756	2406.23	20.7089	196565	275.433					591.807		67.701					2						12.7938						3.4184						67.701
824807	growth factor receptor bound protein 2-associated protein 1 (predicted), isoform CRA_a [Rattus norvegicus] [MASS=76789]	R.SYS*HDVLPK.E	S266*	0.0977345	2.705	149037937	Q13480	5116	405403		52403.1	375379	1.03358e+06	1.81028e+06	2764268	396960	0.1396	0.570947	6.96359			563.252	563.253			27.6042			2	2					0.124389	0.0977345					2.2255	2.705					27.6042	25.5751
824293	GST Y(b) subunit (aa 1-218) [Rattus norvegicus]	R.YLS*TPIFSK.L	S205	15.4813	2.2277	56338	P04905			1433_m1 (S205) 0.37%	242099	497684	55403.8	565545	400671	146602	0.486452	0.0979652	2.73306					568.284		27.6042					2						15.4813						2.2277						27.6042
[truncated: 3,092 more rows]
[truncated: 12 more columns]

## Sheet: Replicate Data Std Dev & CV
counter	protein name	phospho site	peak area Control 1 replicate 1	peak area Control 1 replicate 2	peak area Control 1 replicate 3	peak area Control 1 replicate 4	peak area Control 1 average	peak area Control 1 St.Dev.	peak area Control 1 Coefficient of Var. percent	peak area Rapamycin 1 replicate 1	peak area Rapamycin 1 replicate 2	peak area Rapamycin 1 replicate 3	peak area Rapamycin 1 replicate 4	peak area Rapamycin 1 average	peak area Rapamycin 1 St.Dev.	peak area Rapamycin 1 Coefficient of Var. percent	peak area Control 2 replicate 1	peak area Control 2 replicate 2	peak area Control 2 replicate 3	peak area Control 2 replicate 4	peak area Control 2 average	peak area Control 2 St.Dev.	peak area Control 2 Coefficient of Var. percent	peak area Rapamycin 2 replicate 1	peak area Rapamycin 2 replicate 2	peak area Rapamycin 2 replicate 3	peak area Rapamycin 2 replicate 4	peak area Rapamycin 2 average	peak area Rapamycin 2 St.Dev.	peak area Rapamycin 2 Coefficient of Var. percent	peak area Control 3 replicate 1	peak area Control 3 replicate 2	peak area Control 3 replicate 3	peak area Control 3 average	peak area Control 3 St.Dev.	peak area Control 3 Coefficient of Var. percent	peak area Rapamycin 3 replicate 1	peak area Rapamycin 3 replicate 2	peak area Rapamycin 3 replicate 3	peak area Rapamycin 3 average	peak area Rapamycin 3 St.Dev.	peak area Rapamycin 3 Coefficient of Var. percent	Control 1 / Rapa 1 Ratio	Control 2 / Rapa 2 Ratio	Control 3 / Rapa 3 Ratio	Control / Rapa Average Ratio	peak area Biological Cont Reps (C1, C2, C3) St.Dev.	peak area Biological Control Reps Average	peak area Biological Cont Reps Coefficient of Var. percent
[truncated: 4,241 more rows]
[truncated: 3 more columns]
